# Supplementary material for: Genotype-based “virtual” metabolomics in a clinical biobank identifies novel metabolite-disease associations
Source: Research Square preprint supplement (doi:10.21203/rs.3.rs-3222588/v1), 2023-09-11
Supplement: Supplementary file 1 [file c56c3d2cbdd25776ec7f2e87.xlsx]

## Sheet: Contents
Table	Description
ST1	The association of the genetic risk score for metabolites and BioVU phenotypes in European ancestry.
ST2	The association of the genetic risk score for metabolites and BioVU phenotypes in African ancestry.
ST3	Inverse-variance weighted association (IVWA), MR-Egger and weighted median mendelian randomization results for the association between metabolites and BioVU phenotypes in European ancestry.
ST4	Inverse-variance weighted association (IVWA), MR-Egger and weighted median mendelian randomization results for the association between metabolites and BioVU phenotypes in African ancestry.
ST5	List of single nucleotide polymorphisms (SNP) driving each significant metabolite-phenotype association by mendelian randomization (IVWA) in European ancestry.
ST6	List of single nucleotide polymorphisms (SNP) driving each significant metabolite-phenotype association by mendelian randomization (IVWA) in African ancestry.
ST7	Summary of association analyses between genetic instruments for metabolites in in METSIM and genetic predisposition of phenotypes derived from external GWAS summary statistics by MR methods and MR-PRESSO.
ST8	Summary of association analyses between genetic instruments for metabolites in in METSIM and genetic predisposition of phenotypes derived from external GWAS summary statistics by mendelian randomization (IVWA).

## Sheet: ST1
Supplemental table 1: The association of the genetic risk score for metabolites and BioVU phenotypes in European ancestry.
Phenotype	Phenotype codes	Metabolite ID	Metabolite status	Metabolite biochemical name	Super pathway	Sub pathway	Estimate	Standard Error	z value	Pr(>|z|)	fdr_p	Phen_fdr_p
Abnormal results of function study of pulmonary system	514.1	M34214	Known	1-arachidonoyl-GPI (20:4)*	Lipid	Lysolipid	-1.80935	0.427836	-4.22908	2.34645e-05	0.061989	0.0163548
Acute pulmonary heart disease	415.1	M17769	Known	sphinganine	Lipid	Sphingolipid Metabolism	3.25997	0.444604	7.3323	2.26233e-13	2.39796e-09	1.57685e-10
Acute pulmonary heart disease	415.1	M17747	Known	sphingosine	Lipid	Sphingolipid Metabolism	1.35347	0.246031	5.50123	3.77147e-08	0.000195119	1.31436e-05
Acute reaction to stress	300.8	M35678	Known	hexadecanedioate	Lipid	Fatty Acid Dicarboxylate	0.888324	0.249261	3.56383	0.000365476	0.316573	0.036391
Acute reaction to stress	300.8	M46604	Unknown	X - 11538	NA	NA	1.10001	0.290904	3.78136	0.000155976	0.199366	0.0271789
Acute reaction to stress	300.8	M47652	Unknown	X - 11549	NA	NA	1.53679	0.424078	3.62384	0.000290261	0.285388	0.0337187
Acute reaction to stress	300.8	M46367	Unknown	X - 11905	NA	NA	0.94284	0.238997	3.94499	7.98037e-05	0.135738	0.0251989
Acute reaction to stress	300.8	M46656	Unknown	X - 14662	NA	NA	2.01207	0.519803	3.87084	0.00010846	0.163378	0.0251989
Acute reaction to stress	300.8	M46707	Unknown	X - 17653	NA	NA	1.25211	0.344248	3.63722	0.000275593	0.276712	0.0337187
Acute reaction to stress	300.8	M52544	Unknown	X - 24348	NA	NA	0.69518	0.177017	3.92721	8.59381e-05	0.142004	0.0251989
Adrenal hypofunction	255.2	M52504	Unknown	X - 24309	NA	NA	-0.306918	0.0766438	-4.00447	6.21556e-05	0.115272	0.0433225
Alcoholic liver damage	317.11	M52126	Unknown	X - 24097	NA	NA	-2.94227	0.719951	-4.08676	4.37432e-05	0.0936449	0.030489
Althete's foot	110.12	M46590	Unknown	X - 07765	NA	NA	2.58045	0.630028	4.09576	4.20781e-05	0.0907508	0.0293284
Alzheimer's disease	290.11	M46798	Known	1-oleoyl-2-linoleoyl-glycerol (18:1/18:2)	Lipid	Diacylglycerol	1.34474	0.264489	5.0843	3.68991e-07	0.00161162	4.28645e-05
Alzheimer's disease	290.11	M46799	Known	1-oleoyl-3-linoleoyl-glycerol (18:1/18:2)	Lipid	Diacylglycerol	1.69582	0.284284	5.96523	2.44295e-09	1.54986e-05	4.25683e-07
Alzheimer's disease	290.11	M52616	Known	1-palmitoyl-2-stearoyl-GPC (16:0/18:0)	Lipid	Phospholipid Metabolism	3.00915	0.330596	9.1022	8.85183e-20	1.53873e-15	2.05658e-17
Alzheimer's disease	290.11	M48492	Known	behenoyl sphingomyelin (d18:1/22:0)*	Lipid	Sphingolipid Metabolism	4.0191	0.739432	5.43539	5.46767e-08	0.000270016	7.62193e-06
Alzheimer's disease	290.11	M00063	Known	cholesterol	Lipid	Sterol	2.72669	0.290213	9.39547	5.69608e-21	1.10018e-16	1.98508e-18
Alzheimer's disease	290.11	M44877	Known	N-palmitoyl-sphingosine (d18:1/16:0)	Lipid	Sphingolipid Metabolism	4.19069	0.322668	12.9876	1.43837e-38	7.81356e-34	1.00254e-35
Alzheimer's disease	290.11	M52434	Known	palmitoyl dihydrosphingomyelin (d18:0/16:0)*	Lipid	Sphingolipid Metabolism	1.08038	0.25663	4.20987	2.55519e-05	0.0662946	0.00254424
Alzheimer's disease	290.11	M37506	Known	palmitoyl sphingomyelin (d18:1/16:0)	Lipid	Sphingolipid Metabolism	1.08412	0.268472	4.03812	5.38803e-05	0.104859	0.00469432
Angina pectoris	411.3	M52478	Known	1-(1-enyl-palmitoyl)-2-oleoyl-GPC (P-16:0/18:1)*	Lipid	Plasmalogen	-0.656441	0.175075	-3.74949	0.000177196	0.214203	0.0260257
Angina pectoris	411.3	M52447	Known	1-stearoyl-2-arachidonoyl-GPE (18:0/20:4)	Lipid	Phospholipid Metabolism	0.219038	0.061055	3.58755	0.000333803	0.305076	0.0387767
Angina pectoris	411.3	M00063	Known	cholesterol	Lipid	Sterol	0.570253	0.127489	4.47296	7.71454e-06	0.0249262	0.00268852
Angina pectoris	411.3	M00513	Known	creatinine	Amino Acid	Creatine Metabolism	-0.799027	0.213851	-3.73637	0.000186698	0.220476	0.0260257
Angina pectoris	411.3	M52434	Known	palmitoyl dihydrosphingomyelin (d18:0/16:0)*	Lipid	Sphingolipid Metabolism	0.514553	0.118539	4.34078	1.41975e-05	0.0424052	0.00329856
Angina pectoris	411.3	M37506	Known	palmitoyl sphingomyelin (d18:1/16:0)	Lipid	Sphingolipid Metabolism	0.695553	0.125244	5.55357	2.79886e-08	0.000149243	1.95081e-05
Astigmatism	367.2	M52616	Known	1-palmitoyl-2-stearoyl-GPC (16:0/18:0)	Lipid	Phospholipid Metabolism	-1.52633	0.319498	-4.77728	1.77683e-06	0.00674387	0.00123845
Astigmatism	367.2	M44877	Known	N-palmitoyl-sphingosine (d18:1/16:0)	Lipid	Sphingolipid Metabolism	-1.49245	0.344965	-4.32637	1.51585e-05	0.0443607	0.00528273
Atherosclerosis	440	M00513	Known	creatinine	Amino Acid	Creatine Metabolism	-1.01892	0.228301	-4.46306	8.07984e-06	0.0257241	0.00563165
Atherosclerosis	440	M02829	Known	N-formylmethionine	Amino Acid	Methionine Cysteine SAM and Taurine Metabolism	0.46793	0.11883	3.93782	8.22258e-05	0.138273	0.0286557
Atherosclerosis of the extremities	440.2	M00513	Known	creatinine	Amino Acid	Creatine Metabolism	-1.25481	0.314132	-3.99454	6.482e-05	0.118608	0.0451795
Atopic/contact dermatitis due to other or unspecified	939	M52689	Known	1-(1-enyl-palmitoyl)-2-arachidonoyl-GPC (P-16:0/20:4)*	Lipid	Plasmalogen	-0.202532	0.0562447	-3.60091	0.00031711	0.298612	0.021964
Atopic/contact dermatitis due to other or unspecified	939	M52630	Known	1-(1-enyl-palmitoyl)-2-docosahexaenoyl-GPC (P-16:0/22:6)*	Lipid	Plasmalogen	-0.583342	0.143622	-4.06165	4.87262e-05	0.101076	0.00533744
Atopic/contact dermatitis due to other or unspecified	939	M52677	Known	1-(1-enyl-palmitoyl)-2-linoleoyl-GPE (P-16:0/18:2)*	Lipid	Plasmalogen	0.391664	0.109474	3.5777	0.000346634	0.309641	0.021964
Atopic/contact dermatitis due to other or unspecified	939	M52477	Known	1-(1-enyl-palmitoyl)-2-oleoyl-GPE (P-16:0/18:1)*	Lipid	Plasmalogen	1.21139	0.366515	3.30515	0.000949268	0.451102	0.0417775
Atopic/contact dermatitis due to other or unspecified	939	M52474	Known	1-(1-enyl-palmitoyl)-GPC (P-16:0)*	Lipid	Lysoplasmalogen	-0.546982	0.141381	-3.86884	0.000109353	0.163589	0.00846879
Atopic/contact dermatitis due to other or unspecified	939	M52613	Known	1-(1-enyl-stearoyl)-2-arachidonoyl-GPC (P-18:0/20:4)	Lipid	Plasmalogen	-0.228948	0.0693697	-3.30041	0.000965446	0.45518	0.0417775
Atopic/contact dermatitis due to other or unspecified	939	M52707	Known	1-myristoyl-2-linoleoyl-GPC (14:0/18:2)*	Lipid	Phospholipid Metabolism	0.642216	0.143235	4.48366	7.33726e-06	0.0238848	0.00402232
Atopic/contact dermatitis due to other or unspecified	939	M45453	Known	1-myristoyl-GPC (14:0)	Lipid	Lysolipid	0.877372	0.22288	3.93652	8.26724e-05	0.138684	0.00720283
Atopic/contact dermatitis due to other or unspecified	939	M33230	Known	1-palmitoleoyl-GPC (16:1)*	Lipid	Lysolipid	0.444195	0.13521	3.28524	0.00101896	0.46296	0.0417775
Atopic/contact dermatitis due to other or unspecified	939	M52470	Known	1-palmitoyl-2-palmitoleoyl-GPC (16:0/16:1)*	Lipid	Phospholipid Metabolism	0.743244	0.169456	4.38607	1.15418e-05	0.0353228	0.00402232
Atopic/contact dermatitis due to other or unspecified	939	M52452	Known	1-stearoyl-2-linoleoyl-GPC (18:0/18:2)*	Lipid	Phospholipid Metabolism	0.484884	0.148346	3.2686	0.00108082	0.470316	0.0418518
Atopic/contact dermatitis due to other or unspecified	939	M46203	Known	2-docosahexaenoyl-GPC (22:6)*	Lipid	Lysolipid	-0.444688	0.134089	-3.31638	0.00091192	0.445033	0.0417775
Atopic/contact dermatitis due to other or unspecified	939	M47118	Known	2-palmitoleoyl-GPC (16:1)*	Lipid	Lysolipid	0.629761	0.180685	3.48542	0.000491372	0.355604	0.0263451
Atopic/contact dermatitis due to other or unspecified	939	M27719	Known	galactonate	Carbohydrate	Fructose Mannose and Galactose Metabolism	-1.10937	0.273922	-4.04994	5.12301e-05	0.103072	0.00533744
Atopic/contact dermatitis due to other or unspecified	939	M33364	Known	gamma-glutamylthreonine*	Peptide	Gamma-glutamyl Amino Acid	-0.669688	0.189235	-3.53893	0.000401752	0.326894	0.0233351
Atopic/contact dermatitis due to other or unspecified	939	M01284	Known	threonine	Amino Acid	Glycine Serine and Threonine Metabolism	-0.859489	0.21278	-4.03933	5.36042e-05	0.104859	0.00533744
Atopic/contact dermatitis due to other or unspecified	939	M52053	Unknown	X - 24024	NA	NA	0.73774	0.180168	4.09473	4.22662e-05	0.0909309	0.00533744
Atopic/contact dermatitis due to other or unspecified	939	M52126	Unknown	X - 24097	NA	NA	1.29087	0.308789	4.18043	2.90959e-05	0.0734403	0.00533744
Atrial fibrillation	427.21	M27719	Known	galactonate	Carbohydrate	Fructose Mannose and Galactose Metabolism	0.863681	0.214694	4.02285	5.74977e-05	0.109354	0.0400759
Atrial fibrillation and flutter	427.2	M27719	Known	galactonate	Carbohydrate	Fructose Mannose and Galactose Metabolism	0.870443	0.224762	3.87274	0.000107618	0.162632	0.037505
Atrial fibrillation and flutter	427.2	M49704	Unknown	X - 23314	NA	NA	0.2555	0.0652521	3.91558	9.01872e-05	0.14631	0.037505
Back pain	760	M27719	Known	galactonate	Carbohydrate	Fructose Mannose and Galactose Metabolism	-0.854921	0.153135	-5.58278	2.36709e-08	0.000129264	1.64986e-05
Bone cancer	170.1	M22137	Known	homoarginine	Amino Acid	Urea cycle; Arginine and Proline Metabolism	0.598464	0.157307	3.80443	0.000142131	0.189739	0.0495326
Bone cancer	170.1	M47670	Unknown	X - 18899	NA	NA	-1.00775	0.264233	-3.81387	0.000136806	0.185212	0.0495326
Cancer of esophagus	150	M00542	Known	3-hydroxybutyrate (BHBA)	Lipid	Ketone Bodies	3.97715	0.942106	4.22155	2.4263e-05	0.0633286	0.0169113
Cancer of other lymphoid, histiocytic tissue	202	M35718	Known	dihomo-linolenate (20:3n3 or n6)	Lipid	Polyunsaturated Fatty Acid (n3 and n6)	1.57129	0.382696	4.10584	4.0285e-05	0.0884193	0.0280786
Cancer within the respiratory system	165	M32445	Known	3-methylxanthine	Xenobiotics	Xanthine Metabolism	0.982995	0.230786	4.25934	2.05028e-05	0.0555147	0.0142905
Cardiac defibrillator in situ	426.92	M36594	Known	1-linoleoyl-GPI (18:2)*	Lipid	Lysolipid	0.653589	0.173279	3.77189	0.000162016	0.203788	0.0376417
Cardiac defibrillator in situ	426.92	M52450	Known	1-palmitoyl-2-linoleoyl-GPI (16:0/18:2)	Lipid	Phospholipid Metabolism	0.56455	0.133024	4.24398	2.19592e-05	0.0587261	0.0153055
Cardiac defibrillator in situ	426.92	M52669	Known	1-palmitoyl-2-oleoyl-GPI (16:0/18:1)*	Lipid	Phospholipid Metabolism	0.555652	0.140651	3.95057	7.79652e-05	0.134598	0.0271709
Cardiac pacemaker/device in situ	426.9	M27719	Known	galactonate	Carbohydrate	Fructose Mannose and Galactose Metabolism	1.26739	0.318931	3.97386	7.07176e-05	0.125438	0.0492902
Cardiomegaly	416	M27719	Known	galactonate	Carbohydrate	Fructose Mannose and Galactose Metabolism	0.891833	0.237162	3.76044	0.000169613	0.208221	0.0394067
Cardiomegaly	416	M48009	Unknown	X - 17357	NA	NA	-0.279668	0.0733232	-3.81419	0.000136631	0.185212	0.0394067
Cardiomegaly	416	M48047	Unknown	X - 18886	NA	NA	0.586483	0.144776	4.05096	5.10075e-05	0.102862	0.0355522
Cataract	366	M27719	Known	galactonate	Carbohydrate	Fructose Mannose and Galactose Metabolism	-1.03921	0.218568	-4.75464	1.98801e-06	0.00744785	0.00138565
Celiac disease	557.1	M31787	Known	3-carboxy-4-methyl-5-propyl-2-furanpropanoate (CMPF)	Lipid	Fatty Acid Dicarboxylate	-2.92891	0.64831	-4.51776	6.24984e-06	0.0208127	0.000871228
Celiac disease	557.1	M37181	Known	4-allylphenol sulfate	Xenobiotics	Food Component/Plant	3.03554	0.730069	4.15788	3.21211e-05	0.0774852	0.00373141
Celiac disease	557.1	M36099	Known	4-ethylphenylsulfate	Xenobiotics	Benzoate Metabolism	5.1552	0.93442	5.51701	3.44818e-08	0.000181637	1.20169e-05
Celiac disease	557.1	M36098	Known	4-vinylphenol sulfate	Xenobiotics	Benzoate Metabolism	6.40369	1.14192	5.60784	2.04868e-08	0.000114143	1.20169e-05
Celiac disease	557.1	M42027	Known	histidylalanine	Peptide	Dipeptide	-0.98656	0.24475	-4.03089	5.5567e-05	0.107088	0.00553288
Celiac disease	557.1	M46111	Known	O-methylcatechol sulfate	Xenobiotics	Benzoate Metabolism	4.48227	0.860455	5.20919	1.89664e-07	0.000867624	3.3049e-05
Celiac disease	557.1	M46294	Unknown	X - 21285	NA	NA	1.00253	0.281421	3.56238	0.000367506	0.316701	0.0284613
Celiac disease	557.1	M46356	Unknown	X - 21312	NA	NA	2.07003	0.3831	5.40336	6.54048e-08	0.00032117	1.51957e-05
Celiac disease	557.1	M46455	Unknown	X - 21410	NA	NA	0.658768	0.177216	3.71732	0.000201344	0.22962	0.0175421
Cholecystitis without cholelithiasis	574.3	M48885	Known	arabitol/xylitol	Carbohydrate	Pentose Metabolism	1.52452	0.42824	3.55997	0.000370899	0.316744	0.0416884
Cholecystitis without cholelithiasis	574.3	M32586	Known	bilirubin (E E)*	Cofactors and Vitamins	Hemoglobin and Porphyrin Metabolism	0.292767	0.0885198	3.30736	0.000941786	0.450147	0.0437617
Cholecystitis without cholelithiasis	574.3	M43807	Known	bilirubin (Z Z)	Cofactors and Vitamins	Hemoglobin and Porphyrin Metabolism	0.320171	0.0901188	3.55276	0.000381209	0.318894	0.0416884
Cholecystitis without cholelithiasis	574.3	M02137	Known	biliverdin	Cofactors and Vitamins	Hemoglobin and Porphyrin Metabolism	0.307148	0.0894998	3.43183	0.000599526	0.382021	0.0416884
Cholecystitis without cholelithiasis	574.3	M41888	Known	succinimide	Xenobiotics	Chemical	0.359286	0.107922	3.32912	0.00087121	0.441118	0.0433738
Cholecystitis without cholelithiasis	574.3	M47478	Unknown	X - 10458	NA	NA	-1.16921	0.327097	-3.57452	0.000350875	0.310496	0.0416884
Cholecystitis without cholelithiasis	574.3	M46360	Unknown	X - 11441	NA	NA	0.502293	0.144515	3.4757	0.000509513	0.357901	0.0416884
Cholecystitis without cholelithiasis	574.3	M46443	Unknown	X - 11442	NA	NA	0.476449	0.136578	3.48848	0.00048578	0.354806	0.0416884
Cholecystitis without cholelithiasis	574.3	M46914	Unknown	X - 11522	NA	NA	0.34513	0.0986199	3.4996	0.00046596	0.348831	0.0416884
Cholecystitis without cholelithiasis	574.3	M46603	Unknown	X - 11530	NA	NA	0.339637	0.0986626	3.44241	0.000576564	0.377585	0.0416884
Cholecystitis without cholelithiasis	574.3	M46517	Unknown	X - 16946	NA	NA	0.321078	0.0933242	3.44045	0.000580741	0.377721	0.0416884
Cholecystitis without cholelithiasis	574.3	M46493	Unknown	X - 21448	NA	NA	0.31197	0.092552	3.37075	0.00074963	0.420897	0.0433738
Cholecystitis without cholelithiasis	574.3	M46503	Unknown	X - 21458	NA	NA	0.33262	0.0997536	3.33442	0.000854787	0.441118	0.0433738
Cholecystitis without cholelithiasis	574.3	M46972	Unknown	X - 21796	NA	NA	1.32545	0.38909	3.40654	0.000657923	0.398985	0.0416884
Cholecystitis without cholelithiasis	574.3	M49681	Unknown	X - 23782	NA	NA	1.70696	0.493971	3.45559	0.000549087	0.368382	0.0416884
Cholelithiasis and cholecystitis	574	M32586	Known	bilirubin (E E)*	Cofactors and Vitamins	Hemoglobin and Porphyrin Metabolism	0.175099	0.045787	3.8242	0.000131198	0.181096	0.0057153
Cholelithiasis and cholecystitis	574	M43807	Known	bilirubin (Z Z)	Cofactors and Vitamins	Hemoglobin and Porphyrin Metabolism	0.180655	0.0466827	3.86986	0.000108899	0.163473	0.0057153
Cholelithiasis and cholecystitis	574	M02137	Known	biliverdin	Cofactors and Vitamins	Hemoglobin and Porphyrin Metabolism	0.180803	0.046323	3.90309	9.49722e-05	0.151739	0.0057153
Cholelithiasis and cholecystitis	574	M38102	Known	oleoyl ethanolamide	Lipid	Endocannabinoid	-0.267467	0.0820796	-3.25864	0.00111949	0.475646	0.0458993
Cholelithiasis and cholecystitis	574	M41888	Known	succinimide	Xenobiotics	Chemical	0.214225	0.0558371	3.83661	0.000124745	0.178426	0.0057153
Cholelithiasis and cholecystitis	574	M02761	Known	thyroxine	Amino Acid	Phenylalanine and Tyrosine Metabolism	-0.795831	0.192519	-4.13378	3.56841e-05	0.082541	0.00481711
Cholelithiasis and cholecystitis	574	M47478	Unknown	X - 10458	NA	NA	-0.68601	0.169146	-4.05572	4.99807e-05	0.101975	0.00481711
Cholelithiasis and cholecystitis	574	M46360	Unknown	X - 11441	NA	NA	0.301215	0.0747641	4.02887	5.60454e-05	0.107771	0.00481711
Cholelithiasis and cholecystitis	574	M46443	Unknown	X - 11442	NA	NA	0.299754	0.0705963	4.24603	2.1759e-05	0.0585228	0.00481711
Cholelithiasis and cholecystitis	574	M46914	Unknown	X - 11522	NA	NA	0.206792	0.0510784	4.04853	5.15407e-05	0.103457	0.00481711
Cholelithiasis and cholecystitis	574	M46603	Unknown	X - 11530	NA	NA	0.201616	0.0510525	3.9492	7.84141e-05	0.134641	0.00546546
Cholelithiasis and cholecystitis	574	M46517	Unknown	X - 16946	NA	NA	0.186274	0.0482807	3.85814	0.000114252	0.16831	0.0057153
Cholelithiasis and cholecystitis	574	M46493	Unknown	X - 21448	NA	NA	0.184237	0.0478829	3.84766	0.000119254	0.173039	0.0057153
Cholelithiasis and cholecystitis	574	M46503	Unknown	X - 21458	NA	NA	0.215335	0.0515115	4.18033	2.91083e-05	0.0734403	0.00481711
Cholelithiasis and cholecystitis	574	M46972	Unknown	X - 21796	NA	NA	0.806725	0.201464	4.0043	6.22009e-05	0.115272	0.00481711
Cholelithiasis and cholecystitis	574	M49681	Unknown	X - 23782	NA	NA	1.06228	0.25563	4.15555	3.24509e-05	0.0774862	0.00481711
Cholelithiasis and cholecystitis	574	M15679	Known	xanthurenate	Amino Acid	Tryptophan Metabolism	0.556827	0.133476	4.17173	3.02293e-05	0.0744308	0.00481711
Chronic liver disease and cirrhosis	571	M44877	Known	N-palmitoyl-sphingosine (d18:1/16:0)	Lipid	Sphingolipid Metabolism	-0.63925	0.14738	-4.33744	1.44153e-05	0.0429081	0.0100474
Chronic osteomyelitis	710.12	M01498	Known	N6 N6 N6-trimethyllysine	Amino Acid	Lysine Metabolism	0.902508	0.202143	4.4647	8.01804e-06	0.0257157	0.00558857
Chronic pericarditis	420.22	M01414	Known	3-phosphoglycerate	Carbohydrate	Glycolysis Gluconeogenesis and Pyruvate Metabolism	2.15745	0.606597	3.55665	0.00037562	0.317043	0.037401
Chronic pericarditis	420.22	M32342	Known	adenosine 5'-monophosphate (AMP)	Nucleotide	Purine Metabolism Adenine containing	0.877133	0.249617	3.51391	0.000441562	0.340539	0.0384711
Chronic pericarditis	420.22	M48782	Known	C-glycosyltryptophan	Amino Acid	Tryptophan Metabolism	2.73657	0.740649	3.69482	0.00022004	0.241953	0.0255613
Chronic pericarditis	420.22	M15586	Known	maltose	Carbohydrate	Glycogen Metabolism	0.849983	0.203381	4.17926	2.92465e-05	0.0734559	0.0109837
Chronic pericarditis	420.22	M00594	Known	nicotinamide	Cofactors and Vitamins	Nicotinate and Nicotinamide Metabolism	1.46894	0.353605	4.15418	3.26457e-05	0.0777377	0.0109837
Chronic pericarditis	420.22	M41374	Known	phenylalanylalanine	Peptide	Dipeptide	-2.46206	0.643108	-3.82838	0.00012899	0.180246	0.0179812
Chronic pericarditis	420.22	M01600	Known	phosphoethanolamine	Lipid	Phospholipid Metabolism	1.24444	0.308437	4.03465	5.46834e-05	0.105854	0.0109837
Chronic pericarditis	420.22	M02125	Known	taurine	Amino Acid	Methionine Cysteine SAM and Taurine Metabolism	1.16644	0.291526	4.00115	6.30342e-05	0.11632	0.0109837
Chronic pulmonary heart disease	415.2	M35157	Known	N6-carbamoylthreonyladenosine	Nucleotide	Purine Metabolism Adenine containing	-1.3568	0.332108	-4.08541	4.39987e-05	0.0939604	0.0306671
Cirrhosis of liver without mention of alcohol	571.51	M44877	Known	N-palmitoyl-sphingosine (d18:1/16:0)	Lipid	Sphingolipid Metabolism	-0.876311	0.181865	-4.81847	1.44664e-06	0.00558826	0.00100831
Colles' fracture	803.21	M48009	Unknown	X - 17357	NA	NA	1.63892	0.383132	4.27769	1.88842e-05	0.0519411	0.0131623
Complications of surgical and medical procedures	1011	M52689	Known	1-(1-enyl-palmitoyl)-2-arachidonoyl-GPC (P-16:0/20:4)*	Lipid	Plasmalogen	-0.34178	0.111147	-3.07504	0.00210476	0.564729	0.048917
Complications of surgical and medical procedures	1011	M52677	Known	1-(1-enyl-palmitoyl)-2-linoleoyl-GPE (P-16:0/18:2)*	Lipid	Plasmalogen	0.667785	0.217335	3.0726	0.002122	0.564729	0.048917
Complications of surgical and medical procedures	1011	M52613	Known	1-(1-enyl-stearoyl)-2-arachidonoyl-GPC (P-18:0/20:4)	Lipid	Plasmalogen	-0.445329	0.136253	-3.2684	0.00108158	0.470316	0.0447833
Complications of surgical and medical procedures	1011	M52475	Known	1-(1-enyl-stearoyl)-2-arachidonoyl-GPE (P-18:0/20:4)*	Lipid	Plasmalogen	-0.765364	0.241421	-3.17025	0.0015231	0.522853	0.0461567
Complications of surgical and medical procedures	1011	M52698	Known	1-adrenoyl-GPC (22:4)*	Lipid	Lysolipid	-0.777155	0.251838	-3.08593	0.00202914	0.560897	0.048917
Complications of surgical and medical procedures	1011	M33228	Known	1-arachidonoyl-GPC (20:4n6)*	Lipid	Lysolipid	-0.312966	0.0962415	-3.25189	0.00114641	0.47991	0.0447833
Complications of surgical and medical procedures	1011	M33822	Known	1-docosahexaenoyl-GPC (22:6)*	Lipid	Lysolipid	-0.771949	0.237361	-3.25222	0.00114508	0.47991	0.0447833
Complications of surgical and medical procedures	1011	M37231	Known	1-docosapentaenoyl-GPC (22:5n3)*	Lipid	Lysolipid	-0.675765	0.210248	-3.21414	0.00130837	0.500055	0.0447833
Complications of surgical and medical procedures	1011	M45675	Known	1-docosapentaenoyl-GPC (22:5n6)*	Lipid	Lysolipid	-1.08133	0.274487	-3.93947	8.16611e-05	0.137818	0.0447833
Complications of surgical and medical procedures	1011	M44563	Known	1-eicosapentaenoyl-GPC (20:5)*	Lipid	Lysolipid	-0.481259	0.143588	-3.35166	0.000803293	0.431514	0.0447833
Complications of surgical and medical procedures	1011	M36594	Known	1-linoleoyl-GPI (18:2)*	Lipid	Lysolipid	0.872098	0.234024	3.72654	0.000194127	0.225957	0.0447833
Complications of surgical and medical procedures	1011	M52462	Known	1-palmitoyl-2-arachidonoyl-GPC (16:0/20:4)	Lipid	Phospholipid Metabolism	-0.338421	0.105862	-3.19681	0.00138957	0.506434	0.0447833
Complications of surgical and medical procedures	1011	M52610	Known	1-palmitoyl-2-docosahexaenoyl-GPC (16:0/22:6)	Lipid	Phospholipid Metabolism	-0.92226	0.296432	-3.1112	0.00186329	0.551517	0.048917
Complications of surgical and medical procedures	1011	M52616	Known	1-palmitoyl-2-stearoyl-GPC (16:0/18:0)	Lipid	Phospholipid Metabolism	-0.911428	0.293536	-3.105	0.00190281	0.552967	0.048917
Complications of surgical and medical procedures	1011	M52718	Known	1-palmityl-2-arachidonoyl-GPC (O-16:0/20:4)*	Lipid	Phospholipid Metabolism	-0.46057	0.138271	-3.33093	0.000865577	0.441118	0.0447833
Complications of surgical and medical procedures	1011	M42450	Known	1-stearoyl-2-arachidonoyl-GPC (18:0/20:4)	Lipid	Phospholipid Metabolism	-0.279829	0.0869964	-3.21656	0.00129739	0.498466	0.0447833
Complications of surgical and medical procedures	1011	M52611	Known	1-stearoyl-2-docosahexaenoyl-GPC (18:0/22:6)	Lipid	Phospholipid Metabolism	-0.861564	0.255711	-3.36929	0.000753619	0.421026	0.0447833
Complications of surgical and medical procedures	1011	M52700	Known	1-stearoyl-2-docosapentaenoyl-GPC (18:0/22:5n6)*	Lipid	Phospholipid Metabolism	-0.802763	0.213591	-3.75842	0.000170991	0.20854	0.0447833
Complications of surgical and medical procedures	1011	M52468	Known	1-stearoyl-2-linoleoyl-GPI (18:0/18:2)	Lipid	Phospholipid Metabolism	0.497904	0.155991	3.19187	0.00141353	0.507924	0.0447833
Complications of surgical and medical procedures	1011	M52738	Known	1-stearoyl-2-meadoyl-GPC (18:0/20:3n9)*	Lipid	Phospholipid Metabolism	-0.671548	0.197094	-3.40725	0.000656222	0.398985	0.0447833
Complications of surgical and medical procedures	1011	M33387	Known	2-arachidonoyl-GPC (20:4)*	Lipid	Lysolipid	-0.35601	0.116383	-3.05894	0.00222123	0.568508	0.048917
Complications of surgical and medical procedures	1011	M46203	Known	2-docosahexaenoyl-GPC (22:6)*	Lipid	Lysolipid	-0.83615	0.260174	-3.21382	0.00130983	0.500055	0.0447833
Complications of surgical and medical procedures	1011	M37184	Known	5alpha-androstan-3alpha 17beta-diol disulfate	Lipid	Steroid	0.707612	0.209965	3.37014	0.000751299	0.421018	0.0447833
Complications of surgical and medical procedures	1011	M37185	Known	5alpha-androstan-3alpha 17beta-diol monosulfate (2)	Lipid	Steroid	0.389046	0.107717	3.61176	0.000304132	0.291889	0.0447833
Complications of surgical and medical procedures	1011	M01110	Known	arachidonate (20:4n6)	Lipid	Polyunsaturated Fatty Acid (n3 and n6)	-0.41179	0.13094	-3.14488	0.00166152	0.537381	0.0482534
Complications of surgical and medical procedures	1011	M44675	Known	docosahexaenoate (DHA; 22:6n3)	Lipid	Polyunsaturated Fatty Acid (n3 and n6)	-1.23151	0.367735	-3.34889	0.000811359	0.433702	0.0447833
Complications of surgical and medical procedures	1011	M18467	Known	eicosapentaenoate (EPA; 20:5n3)	Lipid	Polyunsaturated Fatty Acid (n3 and n6)	-0.560997	0.174145	-3.22144	0.00127547	0.497552	0.0447833
Complications of surgical and medical procedures	1011	M52720	Known	phosphatidylcholine (18:0/20:5 16:0/22:5n6)*	Lipid	Phospholipid Metabolism	-0.44664	0.131069	-3.40769	0.000655164	0.398985	0.0447833
Complications of surgical and medical procedures	1011	M33969	Known	stearidonate (18:4n3)	Lipid	Polyunsaturated Fatty Acid (n3 and n6)	-0.805925	0.244904	-3.29078	0.000999102	0.461539	0.0447833
Complications of surgical and medical procedures	1011	M46471	Unknown	X - 12824	NA	NA	-0.397661	0.13014	-3.05564	0.00224583	0.570269	0.048917
Complications of surgical and medical procedures	1011	M46681	Unknown	X - 16935	NA	NA	0.361807	0.1165	3.10564	0.00189866	0.552967	0.048917
Complications of surgical and medical procedures	1011	M49583	Unknown	X - 23705	NA	NA	-0.540352	0.161605	-3.34365	0.000826833	0.436338	0.0447833
Congestive heart failure (CHF) NOS	428.1	M27719	Known	galactonate	Carbohydrate	Fructose Mannose and Galactose Metabolism	1.00251	0.220218	4.55233	5.30546e-06	0.0179428	0.00369791
Congestive heart failure; nonhypertensive	428	M27719	Known	galactonate	Carbohydrate	Fructose Mannose and Galactose Metabolism	1.04237	0.210565	4.95036	7.40746e-07	0.00299454	0.0005163
Contusion	916	M48076	Unknown	X - 22771	NA	NA	-2.16009	0.539083	-4.00698	6.15008e-05	0.115203	0.0428661
Corneal opacity	364.1	M52437	Known	sphingomyelin (d18:2/24:1 d18:1/24:2)*	Lipid	Sphingolipid Metabolism	-3.13053	0.767463	-4.07906	4.52173e-05	0.0956229	0.0315165
Corneal opacity and other disorders of cornea	364	M37207	Known	4-androsten-3alpha 17alpha-diol monosulfate (2)	Lipid	Steroid	0.804659	0.208442	3.86035	0.000113226	0.167366	0.015118
Corneal opacity and other disorders of cornea	364	M37202	Known	4-androsten-3beta 17beta-diol disulfate (1)	Lipid	Steroid	-0.688126	0.164623	-4.18	2.91511e-05	0.0734403	0.00507957
Corneal opacity and other disorders of cornea	364	M37185	Known	5alpha-androstan-3alpha 17beta-diol monosulfate (2)	Lipid	Steroid	0.558271	0.151645	3.68143	0.000231928	0.250329	0.0230934
Corneal opacity and other disorders of cornea	364	M31912	Known	glycolithocholate	Lipid	Secondary Bile Acid Metabolism	1.49842	0.357706	4.18899	2.80203e-05	0.0716297	0.00507957
Corneal opacity and other disorders of cornea	364	M32562	Known	pregnen-diol disulfate*	Lipid	Steroid	-0.517634	0.135287	-3.82619	0.000130141	0.180691	0.015118
Corneal opacity and other disorders of cornea	364	M46599	Unknown	X - 11440	NA	NA	-0.619725	0.13005	-4.76527	1.88597e-06	0.00709615	0.00131452
Corneal opacity and other disorders of cornea	364	M46515	Unknown	X - 21470	NA	NA	-0.679562	0.158075	-4.29897	1.7159e-05	0.048297	0.00507957
Coronary atherosclerosis	411.4	M52612	Known	1-(1-enyl-stearoyl)-2-oleoyl-GPC (P-18:0/18:1)	Lipid	Plasmalogen	0.434233	0.109256	3.97445	7.05428e-05	0.125438	0.00702405
Coronary atherosclerosis	411.4	M32350	Known	1-methylimidazoleacetate	Amino Acid	Histidine Metabolism	0.179693	0.0464566	3.86797	0.000109743	0.163609	0.00905366
Coronary atherosclerosis	411.4	M33997	Known	campesterol	Lipid	Sterol	0.183689	0.0515246	3.56507	0.000363766	0.315539	0.0184296
Coronary atherosclerosis	411.4	M00063	Known	cholesterol	Lipid	Sterol	0.446372	0.0707391	6.31011	2.7883e-10	1.98646e-06	9.71724e-08
Coronary atherosclerosis	411.4	M00513	Known	creatinine	Amino Acid	Creatine Metabolism	-0.459131	0.119891	-3.82958	0.000128361	0.180018	0.00905366
Coronary atherosclerosis	411.4	M40730	Known	imidazole propionate	Amino Acid	Histidine Metabolism	0.505461	0.139984	3.61085	0.000305197	0.291889	0.0184296
Coronary atherosclerosis	411.4	M44877	Known	N-palmitoyl-sphingosine (d18:1/16:0)	Lipid	Sphingolipid Metabolism	0.386478	0.09415	4.10491	4.04466e-05	0.0885504	0.00563825
Coronary atherosclerosis	411.4	M33447	Known	palmitoleate (16:1n7)	Lipid	Long Chain Fatty Acid	-0.651246	0.170187	-3.82666	0.000129895	0.180691	0.00905366
Coronary atherosclerosis	411.4	M52434	Known	palmitoyl dihydrosphingomyelin (d18:0/16:0)*	Lipid	Sphingolipid Metabolism	0.315186	0.0650211	4.84744	1.25065e-06	0.00485275	0.000217926
Coronary atherosclerosis	411.4	M37506	Known	palmitoyl sphingomyelin (d18:1/16:0)	Lipid	Sphingolipid Metabolism	0.441666	0.0685919	6.43904	1.20229e-10	8.94621e-07	8.37995e-08
Coronary atherosclerosis	411.4	M52615	Known	sphingomyelin (d18:1/17:0 d17:1/18:0 d19:1/16:0)	Lipid	Sphingolipid Metabolism	0.334212	0.0831342	4.02015	5.81604e-05	0.110132	0.0067563
Coronary atherosclerosis	411.4	M48490	Known	sphingomyelin (d18:1/20:0 d16:1/22:0)*	Lipid	Sphingolipid Metabolism	0.19234	0.0540209	3.56048	0.000370178	0.316744	0.0184296
Coronary atherosclerosis	411.4	M19503	Known	stearoyl sphingomyelin (d18:1/18:0)	Lipid	Sphingolipid Metabolism	0.33943	0.062382	5.44115	5.29386e-08	0.000262926	1.22994e-05
Coronary atherosclerosis	411.4	M00606	Known	uridine	Nucleotide	Pyrimidine Metabolism Uracil containing	-0.319868	0.089264	-3.58339	0.000339166	0.307077	0.0184296
Decreased white blood cell count	288.1	M47888	Known	1-eicosapentaenoyl-GPE (20:5)*	Lipid	Lysolipid	-0.723492	0.17851	-4.05295	5.05762e-05	0.102349	0.0352516
Decreased white blood cell count	288.1	M52462	Known	1-palmitoyl-2-arachidonoyl-GPC (16:0/20:4)	Lipid	Phospholipid Metabolism	-0.230916	0.0648656	-3.55991	0.000370985	0.316744	0.0430961
Decreased white blood cell count	288.1	M52737	Known	1-palmitoyl-2-meadoyl-GPC (16:0/20:3n9)*	Lipid	Phospholipid Metabolism	-0.457641	0.127802	-3.58087	0.000342447	0.308094	0.0430961
Decreased white blood cell count	288.1	M52738	Known	1-stearoyl-2-meadoyl-GPC (18:0/20:3n9)*	Lipid	Phospholipid Metabolism	-0.435095	0.120851	-3.60026	0.000317896	0.299028	0.0430961
Decreased white blood cell count	288.1	M52703	Known	1-stearyl-GPC (O-18:0)*	Lipid	Lyso-phospho-ether	-1.47133	0.402678	-3.65386	0.000258323	0.269536	0.0430961
Decreased white blood cell count	288.1	M42459	Known	sphingomyelin (d18:2/16:0 d18:1/16:1)*	Lipid	Sphingolipid Metabolism	-1.52074	0.4018	-3.78483	0.000153814	0.197559	0.0430961
Deep vein thrombosis [DVT]	452.2	M34420	Known	bradykinin des-arg(9)	Peptide	Polypeptide	0.286026	0.0736542	3.88336	0.000103023	0.158765	0.0179518
Deep vein thrombosis [DVT]	452.2	M33962	Known	bradykinin hydroxy-pro(3)	Peptide	Polypeptide	0.413774	0.0962057	4.30093	1.70081e-05	0.0481522	0.00395154
Deep vein thrombosis [DVT]	452.2	M17769	Known	sphinganine	Lipid	Sphingolipid Metabolism	2.72506	0.370348	7.35811	1.86531e-13	2.02657e-09	1.30012e-10
Deep vein thrombosis [DVT]	452.2	M17747	Known	sphingosine	Lipid	Sphingolipid Metabolism	1.22206	0.203954	5.99184	2.07481e-09	1.34578e-05	7.23072e-07
Delirium dementia and amnestic and other cognitive disorders	290	M46798	Known	1-oleoyl-2-linoleoyl-glycerol (18:1/18:2)	Lipid	Diacylglycerol	0.777187	0.156531	4.96506	6.86807e-07	0.00281577	7.9784e-05
Delirium dementia and amnestic and other cognitive disorders	290	M46799	Known	1-oleoyl-3-linoleoyl-glycerol (18:1/18:2)	Lipid	Diacylglycerol	0.930706	0.169322	5.49666	3.8705e-08	0.000199058	5.39547e-06
Delirium dementia and amnestic and other cognitive disorders	290	M52616	Known	1-palmitoyl-2-stearoyl-GPC (16:0/18:0)	Lipid	Phospholipid Metabolism	1.56357	0.193344	8.08696	6.11738e-16	8.43965e-12	2.13191e-13
Delirium dementia and amnestic and other cognitive disorders	290	M48492	Known	behenoyl sphingomyelin (d18:1/22:0)*	Lipid	Sphingolipid Metabolism	1.96786	0.357691	5.50157	3.76435e-08	0.000195119	5.39547e-06
Delirium dementia and amnestic and other cognitive disorders	290	M00063	Known	cholesterol	Lipid	Sterol	1.23535	0.158718	7.78329	7.06605e-15	8.77361e-11	1.64168e-12
Delirium dementia and amnestic and other cognitive disorders	290	M44877	Known	N-palmitoyl-sphingosine (d18:1/16:0)	Lipid	Sphingolipid Metabolism	1.94843	0.194502	10.0175	1.27678e-23	3.17064e-19	8.89914e-21
Delirium dementia and amnestic and other cognitive disorders	290	M37506	Known	palmitoyl sphingomyelin (d18:1/16:0)	Lipid	Sphingolipid Metabolism	0.679257	0.151857	4.47301	7.71279e-06	0.0249262	0.000767973
Dementia with cerebral degenerations	290.12	M44877	Known	N-palmitoyl-sphingosine (d18:1/16:0)	Lipid	Sphingolipid Metabolism	3.15056	0.672519	4.68472	2.80346e-06	0.0101952	0.00195401
Dementias	290.1	M46798	Known	1-oleoyl-2-linoleoyl-glycerol (18:1/18:2)	Lipid	Diacylglycerol	1.0314	0.174743	5.90236	3.58329e-09	2.22461e-05	4.99511e-07
Dementias	290.1	M46799	Known	1-oleoyl-3-linoleoyl-glycerol (18:1/18:2)	Lipid	Diacylglycerol	1.23894	0.18881	6.56183	5.31523e-11	4.16196e-07	9.26179e-09
Dementias	290.1	M52616	Known	1-palmitoyl-2-stearoyl-GPC (16:0/18:0)	Lipid	Phospholipid Metabolism	2.17772	0.216881	10.0411	1.00554e-23	2.57052e-19	3.50432e-21
Dementias	290.1	M48492	Known	behenoyl sphingomyelin (d18:1/22:0)*	Lipid	Sphingolipid Metabolism	2.37693	0.409713	5.80145	6.57447e-09	3.99598e-05	7.63734e-07
Dementias	290.1	M00063	Known	cholesterol	Lipid	Sterol	1.76651	0.180943	9.76276	1.62659e-22	3.53442e-18	3.77912e-20
Dementias	290.1	M44877	Known	N-palmitoyl-sphingosine (d18:1/16:0)	Lipid	Sphingolipid Metabolism	2.88728	0.216314	13.3476	1.22319e-40	7.59392e-36	8.52565e-38
Dementias	290.1	M52434	Known	palmitoyl dihydrosphingomyelin (d18:0/16:0)*	Lipid	Sphingolipid Metabolism	0.600073	0.160783	3.73219	0.000189822	0.222053	0.0165383
Dementias	290.1	M37506	Known	palmitoyl sphingomyelin (d18:1/16:0)	Lipid	Sphingolipid Metabolism	0.867451	0.171563	5.05617	4.27756e-07	0.0018136	4.25922e-05
Diseases and other conditions of the tongue	529	M02730	Known	gamma-glutamylglutamine	Peptide	Gamma-glutamyl Amino Acid	-2.16213	0.540818	-3.99788	6.39122e-05	0.117194	0.0445468
Diseases of the salivary glands	527	M38116	Known	indole-3-carboxylic acid	Amino Acid	Tryptophan Metabolism	1.74188	0.406991	4.27988	1.86991e-05	0.0518757	0.0130333
Disorders of bilirubin excretion	277.4	M32586	Known	bilirubin (E E)*	Cofactors and Vitamins	Hemoglobin and Porphyrin Metabolism	0.966082	0.137394	7.03146	2.04379e-12	1.86987e-08	1.5828e-10
Disorders of bilirubin excretion	277.4	M43807	Known	bilirubin (Z Z)	Cofactors and Vitamins	Hemoglobin and Porphyrin Metabolism	1.01137	0.140403	7.20329	5.87754e-13	5.67613e-09	6.82774e-11
Disorders of bilirubin excretion	277.4	M02137	Known	biliverdin	Cofactors and Vitamins	Hemoglobin and Porphyrin Metabolism	1.004	0.139333	7.20575	5.77262e-13	5.67613e-09	6.82774e-11
Disorders of bilirubin excretion	277.4	M00058	Known	glycine	Amino Acid	Glycine Serine and Threonine Metabolism	0.730547	0.216243	3.37836	0.000729203	0.416114	0.0317659
Disorders of bilirubin excretion	277.4	M41888	Known	succinimide	Xenobiotics	Chemical	1.19564	0.167632	7.13249	9.85663e-13	9.41427e-09	9.81439e-11
Disorders of bilirubin excretion	277.4	M02761	Known	thyroxine	Amino Acid	Phenylalanine and Tyrosine Metabolism	-3.97669	0.587871	-6.76456	1.33715e-11	1.13941e-07	6.21329e-10
Disorders of bilirubin excretion	277.4	M47478	Unknown	X - 10458	NA	NA	-3.52925	0.51176	-6.8963	5.33757e-12	4.6392e-08	2.86176e-10
Disorders of bilirubin excretion	277.4	M46360	Unknown	X - 11441	NA	NA	1.65801	0.225462	7.35385	1.92577e-13	2.06642e-09	6.82774e-11
Disorders of bilirubin excretion	277.4	M46443	Unknown	X - 11442	NA	NA	1.53765	0.213192	7.21252	5.4927e-13	5.55063e-09	6.82774e-11
Disorders of bilirubin excretion	277.4	M46914	Unknown	X - 11522	NA	NA	1.10496	0.153234	7.21096	5.556e-13	5.55063e-09	6.82774e-11
Disorders of bilirubin excretion	277.4	M46603	Unknown	X - 11530	NA	NA	1.10773	0.153754	7.20457	5.82281e-13	5.67613e-09	6.82774e-11
Disorders of bilirubin excretion	277.4	M46517	Unknown	X - 16946	NA	NA	1.0171	0.145667	6.98236	2.90257e-12	2.62791e-08	1.87236e-10
Disorders of bilirubin excretion	277.4	M46493	Unknown	X - 21448	NA	NA	1.0165	0.144054	7.05636	1.70923e-12	1.58042e-08	1.48917e-10
Disorders of bilirubin excretion	277.4	M46503	Unknown	X - 21458	NA	NA	1.07858	0.155504	6.93602	4.0329e-12	3.57677e-08	2.34244e-10
Disorders of bilirubin excretion	277.4	M46972	Unknown	X - 21796	NA	NA	4.20647	0.602659	6.97985	2.95494e-12	2.64774e-08	1.87236e-10
Disorders of bilirubin excretion	277.4	M49681	Unknown	X - 23782	NA	NA	5.21794	0.767686	6.79698	1.06837e-11	9.19392e-08	5.31897e-10
Disorders of iron metabolism	275.1	M12017	Known	3-methoxytyrosine	Amino Acid	Phenylalanine and Tyrosine Metabolism	-0.981004	0.276945	-3.54224	0.00039675	0.32532	0.0307261
Disorders of iron metabolism	275.1	M37203	Known	4-androsten-3beta 17beta-diol disulfate (2)	Lipid	Steroid	-2.16914	0.361501	-6.00037	1.96867e-09	1.29628e-05	3.4304e-07
Disorders of iron metabolism	275.1	M37210	Known	4-androsten-3beta 17beta-diol monosulfate (2)	Lipid	Steroid	-1.27632	0.280663	-4.54752	5.42807e-06	0.0182863	0.00063056
Disorders of iron metabolism	275.1	M47114	Known	ferulic acid 4-sulfate	Xenobiotics	Food Component/Plant	1.53337	0.274705	5.58186	2.37956e-08	0.000129264	3.31711e-06
Disorders of iron metabolism	275.1	M33959	Known	N-acetyltryptophan	Amino Acid	Tryptophan Metabolism	0.984118	0.275331	3.5743	0.000351165	0.310496	0.0305952
Disorders of iron metabolism	275.1	M46991	Unknown	X - 12814	NA	NA	-6.76773	0.977719	-6.92196	4.45436e-12	3.91066e-08	1.55235e-09
Disorders of iron metabolism	275.1	M46471	Unknown	X - 12824	NA	NA	0.731538	0.213937	3.41941	0.000627571	0.39129	0.0364514
Disorders of iron metabolism	275.1	M46417	Unknown	X - 13866	NA	NA	1.31754	0.30431	4.32959	1.49385e-05	0.044114	0.00148745
Disorders of iron metabolism	275.1	M46294	Unknown	X - 21285	NA	NA	-1.79633	0.293311	-6.12432	9.10711e-10	6.28216e-06	2.11588e-07
Disorders of iron metabolism	275.1	M46409	Unknown	X - 21364	NA	NA	-7.78592	0.948522	-8.20848	2.24011e-16	3.30003e-12	1.56136e-13
Disorders of iron metabolism	275.1	M46455	Unknown	X - 21410	NA	NA	-0.696083	0.203217	-3.42532	0.000614081	0.386764	0.0364514
Disorders of iron metabolism	275.1	M52865	Unknown	X - 24544	NA	NA	-0.808533	0.23275	-3.47383	0.000513091	0.358395	0.0357625
Disorders of lipoid metabolism	272	M52682	Known	1-(1-enyl-palmitoyl)-2-linoleoyl-GPC (P-16:0/18:2)*	Lipid	Plasmalogen	-0.41995	0.100945	-4.16017	3.18008e-05	0.0772065	0.000820931
Disorders of lipoid metabolism	272	M52478	Known	1-(1-enyl-palmitoyl)-2-oleoyl-GPC (P-16:0/18:1)*	Lipid	Plasmalogen	-0.442796	0.0805863	-5.49468	3.91419e-08	0.000200121	1.60482e-06
Disorders of lipoid metabolism	272	M52713	Known	1-(1-enyl-palmitoyl)-2-palmitoleoyl-GPC (P-16:0/16:1)*	Lipid	Plasmalogen	-0.151901	0.0369423	-4.11184	3.92511e-05	0.0869945	0.000943379
Disorders of lipoid metabolism	272	M52612	Known	1-(1-enyl-stearoyl)-2-oleoyl-GPC (P-18:0/18:1)	Lipid	Plasmalogen	0.323663	0.0901975	3.58838	0.000332742	0.304748	0.00539351
Disorders of lipoid metabolism	272	M45675	Known	1-docosapentaenoyl-GPC (22:5n6)*	Lipid	Lysolipid	0.283395	0.0714921	3.96401	7.37023e-05	0.129151	0.00155668
Disorders of lipoid metabolism	272	M45951	Known	1-linolenoyl-GPC (18:3)*	Lipid	Lysolipid	0.424762	0.110578	3.84128	0.000122396	0.17642	0.00243743
Disorders of lipoid metabolism	272	M45453	Known	1-myristoyl-GPC (14:0)	Lipid	Lysolipid	0.542918	0.115006	4.7208	2.34922e-06	0.00872583	7.11915e-05
Disorders of lipoid metabolism	272	M46798	Known	1-oleoyl-2-linoleoyl-glycerol (18:1/18:2)	Lipid	Diacylglycerol	0.470138	0.0612099	7.68075	1.58161e-14	1.85766e-10	1.10238e-12
Disorders of lipoid metabolism	272	M46799	Known	1-oleoyl-3-linoleoyl-glycerol (18:1/18:2)	Lipid	Diacylglycerol	0.468634	0.0663842	7.05942	1.67195e-12	1.56257e-08	8.96423e-11
Disorders of lipoid metabolism	272	M35628	Known	1-oleoyl-GPE (18:1)	Lipid	Lysolipid	0.542579	0.146201	3.7112	0.000206283	0.232546	0.00368665
Disorders of lipoid metabolism	272	M52683	Known	1-palmitoleoyl-2-linoleoyl-GPC (16:1/18:2)*	Lipid	Phospholipid Metabolism	-0.180912	0.0537296	-3.36709	0.000759671	0.421901	0.0115107
Disorders of lipoid metabolism	272	M33230	Known	1-palmitoleoyl-GPC (16:1)*	Lipid	Lysolipid	0.207729	0.0688226	3.01832	0.00254177	0.590696	0.0347375
Disorders of lipoid metabolism	272	M52633	Known	1-palmitoyl-2-linoleoyl-glycerol (16:0/18:2)*	Lipid	Diacylglycerol	0.211999	0.0724154	2.92754	0.0034166	0.63167	0.0435536
Disorders of lipoid metabolism	272	M52470	Known	1-palmitoyl-2-palmitoleoyl-GPC (16:0/16:1)*	Lipid	Phospholipid Metabolism	0.432191	0.0877986	4.92252	8.54368e-07	0.00342204	2.70679e-05
Disorders of lipoid metabolism	272	M52616	Known	1-palmitoyl-2-stearoyl-GPC (16:0/18:0)	Lipid	Phospholipid Metabolism	0.558739	0.074508	7.49906	6.42786e-14	7.25563e-10	4.07293e-12
Disorders of lipoid metabolism	272	M52634	Known	1-palmitoyl-3-linoleoyl-glycerol (16:0/18:2)*	Lipid	Diacylglycerol	0.591561	0.0802253	7.37374	1.65902e-13	1.84866e-09	9.63617e-12
Disorders of lipoid metabolism	272	M33955	Known	1-palmitoyl-GPC (16:0)	Lipid	Lysolipid	0.446007	0.0881022	5.06238	4.1405e-07	0.00176409	1.44296e-05
Disorders of lipoid metabolism	272	M52447	Known	1-stearoyl-2-arachidonoyl-GPE (18:0/20:4)	Lipid	Phospholipid Metabolism	0.107697	0.0281053	3.83192	0.000127149	0.179989	0.00246175
Disorders of lipoid metabolism	272	M52449	Known	1-stearoyl-2-arachidonoyl-GPI (18:0/20:4)	Lipid	Phospholipid Metabolism	0.154502	0.0358905	4.30483	1.67115e-05	0.0476227	0.000447996
Disorders of lipoid metabolism	272	M52466	Known	1-stearoyl-2-docosahexaenoyl-GPE (18:0/22:6)*	Lipid	Phospholipid Metabolism	0.130428	0.0323556	4.0311	5.5517e-05	0.107088	0.00120923
Disorders of lipoid metabolism	272	M52699	Known	1-stearoyl-2-docosapentaenoyl-GPC (18:0/22:5n3)*	Lipid	Phospholipid Metabolism	0.154162	0.042123	3.65981	0.000252402	0.265374	0.00439811
Disorders of lipoid metabolism	272	M52438	Known	1-stearoyl-2-oleoyl-GPC (18:0/18:1)	Lipid	Phospholipid Metabolism	0.394832	0.116758	3.38162	0.000720603	0.414506	0.0111613
Disorders of lipoid metabolism	272	M42448	Known	1-stearoyl-2-oleoyl-GPE (18:0/18:1)	Lipid	Phospholipid Metabolism	0.224858	0.0589647	3.81344	0.000137047	0.18525	0.00251373
Disorders of lipoid metabolism	272	M33961	Known	1-stearoyl-GPC (18:0)	Lipid	Lysolipid	0.318223	0.0955025	3.33209	0.000861976	0.441118	0.0125166
Disorders of lipoid metabolism	272	M52281	Known	2-hydroxybutyrate/2-hydroxyisobutyrate	Amino Acid	Methionine Cysteine SAM and Taurine Metabolism	0.263776	0.0879601	2.99881	0.00271033	0.602745	0.0356434
Disorders of lipoid metabolism	272	M35253	Known	2-palmitoyl-GPC (16:0)*	Lipid	Lysolipid	0.448765	0.129561	3.46373	0.000532739	0.363608	0.00843907
Disorders of lipoid metabolism	272	M45452	Known	2-palmitoyl-GPE (16:0)*	Lipid	Lysolipid	0.142525	0.0473626	3.00922	0.00261916	0.597185	0.0351069
Disorders of lipoid metabolism	272	M48492	Known	behenoyl sphingomyelin (d18:1/22:0)*	Lipid	Sphingolipid Metabolism	1.13366	0.120171	9.43372	3.95804e-21	8.19086e-17	3.94107e-19
Disorders of lipoid metabolism	272	M33997	Known	campesterol	Lipid	Sterol	0.153026	0.0424488	3.60494	0.000312223	0.295611	0.00518141
Disorders of lipoid metabolism	272	M00063	Known	cholesterol	Lipid	Sterol	0.965946	0.0588191	16.4223	1.32418e-60	5.7546e-55	9.22952e-58
Disorders of lipoid metabolism	272	M33364	Known	gamma-glutamylthreonine*	Peptide	Gamma-glutamyl Amino Acid	-0.423882	0.0984028	-4.30763	1.65016e-05	0.0471794	0.000447996
Disorders of lipoid metabolism	272	M15990	Known	glycerophosphorylcholine (GPC)	Lipid	Phospholipid Metabolism	0.376641	0.0985165	3.82313	0.00013177	0.181504	0.00248227
Disorders of lipoid metabolism	272	M53013	Known	glycosyl-N-palmitoyl-sphingosine	Lipid	Sphingolipid Metabolism	0.124055	0.0371132	3.3426	0.000829964	0.43683	0.0123082
Disorders of lipoid metabolism	272	M53010	Known	lactosyl-N-palmitoyl-sphingosine	Lipid	Sphingolipid Metabolism	0.318312	0.0505348	6.29887	2.99827e-10	2.11161e-06	1.30612e-08
Disorders of lipoid metabolism	272	M44877	Known	N-palmitoyl-sphingosine (d18:1/16:0)	Lipid	Sphingolipid Metabolism	0.939091	0.0774225	12.1294	7.37654e-34	3.20569e-29	1.71382e-31
Disorders of lipoid metabolism	272	M33447	Known	palmitoleate (16:1n7)	Lipid	Long Chain Fatty Acid	-0.569001	0.140212	-4.05815	4.94637e-05	0.101575	0.00111214
Disorders of lipoid metabolism	272	M52434	Known	palmitoyl dihydrosphingomyelin (d18:0/16:0)*	Lipid	Sphingolipid Metabolism	0.623573	0.0537655	11.598	4.21749e-31	1.46627e-26	7.34897e-29
Disorders of lipoid metabolism	272	M37506	Known	palmitoyl sphingomyelin (d18:1/16:0)	Lipid	Sphingolipid Metabolism	0.8824	0.0570175	15.4759	5.04259e-54	1.0957e-48	1.75734e-51
Disorders of lipoid metabolism	272	M52719	Known	phosphatidylcholine (16:0/22:5n3 18:1/20:4)*	Lipid	Phospholipid Metabolism	0.098467	0.0336559	2.9257	0.0034368	0.633058	0.0435536
Disorders of lipoid metabolism	272	M01806	Known	retinol (Vitamin A)	Cofactors and Vitamins	Vitamin A Metabolism	0.292669	0.0916706	3.19262	0.0014099	0.507049	0.0200551
Disorders of lipoid metabolism	272	M17769	Known	sphinganine	Lipid	Sphingolipid Metabolism	0.454738	0.156295	2.90949	0.00362024	0.641283	0.0450591
Disorders of lipoid metabolism	272	M42463	Known	sphingomyelin (d18:1/14:0 d16:1/16:0)*	Lipid	Sphingolipid Metabolism	0.136661	0.04393	3.11088	0.00186529	0.551581	0.0260022
Disorders of lipoid metabolism	272	M52433	Known	sphingomyelin (d18:1/15:0 d16:1/17:0)*	Lipid	Sphingolipid Metabolism	0.215602	0.0491133	4.38989	1.1341e-05	0.034831	0.000329363
Disorders of lipoid metabolism	272	M52615	Known	sphingomyelin (d18:1/17:0 d17:1/18:0 d19:1/16:0)	Lipid	Sphingolipid Metabolism	0.772605	0.068725	11.242	2.53635e-29	7.87318e-25	3.53567e-27
Disorders of lipoid metabolism	272	M48490	Known	sphingomyelin (d18:1/20:0 d16:1/22:0)*	Lipid	Sphingolipid Metabolism	0.347891	0.044585	7.80288	6.05115e-15	7.73443e-11	4.68628e-13
Disorders of lipoid metabolism	272	M48491	Known	sphingomyelin (d18:1/20:1 d18:2/20:0)*	Lipid	Sphingolipid Metabolism	0.156571	0.0380184	4.1183	3.81684e-05	0.0863918	0.000943379
Disorders of lipoid metabolism	272	M52495	Known	sphingomyelin (d18:1/21:0 d17:1/22:0 d16:1/23:0)*	Lipid	Sphingolipid Metabolism	0.159181	0.0436276	3.64862	0.00026365	0.271185	0.00448205
Disorders of lipoid metabolism	272	M48493	Known	sphingomyelin (d18:1/22:1 d18:2/22:0 d16:1/24:1)*	Lipid	Sphingolipid Metabolism	0.485743	0.0757134	6.41555	1.4032e-10	1.03356e-06	6.52018e-09
Disorders of lipoid metabolism	272	M52435	Known	sphingomyelin (d18:2/23:0 d18:1/23:1 d17:1/24:1)*	Lipid	Sphingolipid Metabolism	0.744853	0.0953131	7.8148	5.50486e-15	7.1412e-11	4.68628e-13
Disorders of lipoid metabolism	272	M33969	Known	stearidonate (18:4n3)	Lipid	Polyunsaturated Fatty Acid (n3 and n6)	0.26331	0.0642434	4.09863	4.156e-05	0.0900804	0.000965578
Disorders of lipoid metabolism	272	M19503	Known	stearoyl sphingomyelin (d18:1/18:0)	Lipid	Sphingolipid Metabolism	0.529403	0.0514853	10.2826	8.44253e-25	2.22361e-20	9.8074e-23
Disorders of lipoid metabolism	272	M01284	Known	threonine	Amino Acid	Glycine Serine and Threonine Metabolism	-0.571929	0.109617	-5.21752	1.81339e-07	0.000838365	6.65229e-06
Disorders of lipoid metabolism	272	M46621	Unknown	X - 12524	NA	NA	0.735385	0.147532	4.98458	6.20961e-07	0.00255788	2.061e-05
Disorders of lipoid metabolism	272	M47715	Unknown	X - 12681	NA	NA	-0.209271	0.0534939	-3.91206	9.15134e-05	0.147591	0.00187602
Disorders of lipoid metabolism	272	M52053	Unknown	X - 24024	NA	NA	0.617964	0.0938145	6.58708	4.48558e-11	3.54425e-07	2.23318e-09
Disorders of lipoid metabolism	272	M52126	Unknown	X - 24097	NA	NA	0.871567	0.159911	5.45032	5.02789e-08	0.000251152	1.94691e-06
Disorders of optic nerve and visual pathways	377	M44630	Known	1-dihomo-linolenoyl-GPE (20:3n3 or 6)*	Lipid	Lysolipid	-0.974587	0.261766	-3.72313	0.000196768	0.226968	0.0339285
Disorders of optic nerve and visual pathways	377	M52705	Known	1-oleoyl-2-dihomo-linolenoyl-GPC (18:1/20:3)*	Lipid	Phospholipid Metabolism	-0.945454	0.250122	-3.77997	0.000156846	0.199544	0.0339285
Disorders of optic nerve and visual pathways	377	M52454	Known	1-palmitoyl-2-dihomo-linolenoyl-GPC (16:0/20:3n3 or 6)*	Lipid	Phospholipid Metabolism	-0.973926	0.272432	-3.57493	0.000350325	0.310496	0.0406961
Disorders of optic nerve and visual pathways	377	M52629	Known	1-stearoyl-2-dihomo-linolenoyl-GPC (18:0/20:3n3 or 6)*	Lipid	Phospholipid Metabolism	-0.993827	0.270863	-3.66912	0.000243389	0.258611	0.0339285
Disorders of optic nerve and visual pathways	377	M35718	Known	dihomo-linolenate (20:3n3 or n6)	Lipid	Polyunsaturated Fatty Acid (n3 and n6)	-1.85463	0.487006	-3.80823	0.000139965	0.188025	0.0339285
Disorders of optic nerve and visual pathways	377	M52670	Unknown	X - 24438	NA	NA	-0.763661	0.199095	-3.83567	0.000125224	0.178426	0.0339285
Disorders of plasma protein metabolism	270.3	M52449	Known	1-stearoyl-2-arachidonoyl-GPI (18:0/20:4)	Lipid	Phospholipid Metabolism	-0.654224	0.160216	-4.08339	4.43827e-05	0.0943169	0.0309347
Disorders of plasma protein metabolism	270.3	M44877	Known	N-palmitoyl-sphingosine (d18:1/16:0)	Lipid	Sphingolipid Metabolism	-1.41181	0.367615	-3.84045	0.000122809	0.17643	0.0427988
Disorders of protein plasma/amino-acid transport and metabolism	270	M52616	Known	1-palmitoyl-2-stearoyl-GPC (16:0/18:0)	Lipid	Phospholipid Metabolism	-1.22927	0.317309	-3.87405	0.000107043	0.162086	0.0373044
Disorders of protein plasma/amino-acid transport and metabolism	270	M52449	Known	1-stearoyl-2-arachidonoyl-GPI (18:0/20:4)	Lipid	Phospholipid Metabolism	-0.645424	0.149618	-4.3138	1.60469e-05	0.0463367	0.0111847
Disorders of refraction and accommodation; blindness and low vision	367	M27719	Known	galactonate	Carbohydrate	Fructose Mannose and Galactose Metabolism	-1.26297	0.314438	-4.0166	5.90431e-05	0.111319	0.0411531
Disorders of tooth development	520	M47031	Known	2-methoxyacetaminophen sulfate*	Xenobiotics	Drug	1.51636	0.373814	4.05645	4.98239e-05	0.101894	0.0347273
Disturbance of salivary secretion	527.7	M38116	Known	indole-3-carboxylic acid	Amino Acid	Tryptophan Metabolism	1.75094	0.433601	4.03813	5.38785e-05	0.104859	0.0375533
Disturbance of salivary secretion	527.7	M49679	Unknown	X - 23780	NA	NA	-1.89894	0.499105	-3.80468	0.000141988	0.189739	0.0494827
Disturbances in tooth eruption	520.2	M47031	Known	2-methoxyacetaminophen sulfate*	Xenobiotics	Drug	1.64041	0.359249	4.56621	4.96609e-06	0.0169268	0.00346137
Disturbances in tooth eruption	520.2	M12032	Known	4-acetamidophenol	Xenobiotics	Drug	1.48947	0.361303	4.12248	3.74808e-05	0.0850569	0.0130621
Diverticulitis	562.2	M46640	Unknown	X - 15469	NA	NA	-1.18037	0.279232	-4.22721	2.36611e-05	0.0623189	0.0164918
Dry eyes	375.1	M27719	Known	galactonate	Carbohydrate	Fructose Mannose and Galactose Metabolism	-1.18996	0.293597	-4.05302	5.05597e-05	0.102349	0.0352401
Edema	782.3	M52504	Unknown	X - 24309	NA	NA	-0.10969	0.0269907	-4.06398	4.82423e-05	0.100552	0.0336249
Encounter for long-term (current) use of anticoagulants	286.2	M32445	Known	3-methylxanthine	Xenobiotics	Xanthine Metabolism	-0.602024	0.162622	-3.70198	0.000213919	0.238985	0.0497006
Encounter for long-term (current) use of anticoagulants	286.2	M17769	Known	sphinganine	Lipid	Sphingolipid Metabolism	1.3454	0.238819	5.63353	1.76559e-08	0.000100299	1.23062e-05
Encounter for long-term (current) use of anticoagulants	286.2	M17747	Known	sphingosine	Lipid	Sphingolipid Metabolism	0.545501	0.13542	4.02821	5.62029e-05	0.107835	0.0195867
Encounter for long-term (current) use of antiplatelets/antithrombotics	457.2	M01649	Known	valine	Amino Acid	Leucine Isoleucine and Valine Metabolism	-3.1263	0.777895	-4.01893	5.84634e-05	0.110465	0.040749
Epiphora	375.2	M12017	Known	3-methoxytyrosine	Amino Acid	Phenylalanine and Tyrosine Metabolism	-1.69559	0.40857	-4.15005	3.324e-05	0.0785481	0.0130513
Epiphora	375.2	M36808	Known	dimethylarginine (SDMA + ADMA)	Amino Acid	Urea cycle; Arginine and Proline Metabolism	2.77237	0.672468	4.12267	3.745e-05	0.0850569	0.0130513
Esophageal bleeding (varices/hemorrhage)	530.2	M00058	Known	glycine	Amino Acid	Glycine Serine and Threonine Metabolism	0.39859	0.102474	3.88966	0.000100383	0.15608	0.0349835
Esophageal bleeding (varices/hemorrhage)	530.2	M44877	Known	N-palmitoyl-sphingosine (d18:1/16:0)	Lipid	Sphingolipid Metabolism	-1.16018	0.273488	-4.24217	2.21365e-05	0.0588384	0.0154292
Fever of unknown origin	783	M46601	Unknown	X - 11470	NA	NA	-0.179302	0.043608	-4.11167	3.92811e-05	0.0869945	0.0273789
Foreign body injury	1001	M46898	Unknown	X - 21729	NA	NA	3.5332	0.854155	4.13648	3.5267e-05	0.0821786	0.0245811
Fracture of hand or wrist	804	M47901	Unknown	X - 11485	NA	NA	1.79018	0.453561	3.94694	7.91565e-05	0.134901	0.027586
Fracture of hand or wrist	804	M46403	Unknown	X - 21358	NA	NA	1.62745	0.376093	4.32725	1.50983e-05	0.0443337	0.0105235
Fracture of patella	800.4	M42095	Known	palmitic amide	Lipid	Fatty Acid Amide	-3.96241	0.918405	-4.31444	1.60006e-05	0.0463367	0.0111524
Frequency of urination and polyuria	599.5	M27719	Known	galactonate	Carbohydrate	Fructose Mannose and Galactose Metabolism	-1.10767	0.267965	-4.13363	3.57074e-05	0.082541	0.0248881
Gingivitis	523.1	M47031	Known	2-methoxyacetaminophen sulfate*	Xenobiotics	Drug	0.988801	0.2489	3.97268	7.1068e-05	0.125636	0.0165115
Gingivitis	523.1	M12032	Known	4-acetamidophenol	Xenobiotics	Drug	0.966576	0.224138	4.31241	1.61485e-05	0.0464756	0.0112555
Gingivitis	523.1	M46172	Known	5alpha-pregnan-3(alpha or beta) 20beta-diol disulfate	Lipid	Steroid	0.911497	0.221766	4.11018	3.95357e-05	0.0869945	0.0137782
Gout	274.1	M52612	Known	1-(1-enyl-stearoyl)-2-oleoyl-GPC (P-18:0/18:1)	Lipid	Plasmalogen	0.680814	0.195206	3.48767	0.000487252	0.354987	0.0121291
Gout	274.1	M45675	Known	1-docosapentaenoyl-GPC (22:5n6)*	Lipid	Lysolipid	0.733931	0.158691	4.62491	3.74759e-06	0.0132949	0.00011873
Gout	274.1	M45951	Known	1-linolenoyl-GPC (18:3)*	Lipid	Lysolipid	1.14494	0.231362	4.94866	7.47244e-07	0.00300682	2.60415e-05
Gout	274.1	M52707	Known	1-myristoyl-2-linoleoyl-GPC (14:0/18:2)*	Lipid	Phospholipid Metabolism	0.599151	0.161993	3.69862	0.000216771	0.240927	0.0065691
Gout	274.1	M45453	Known	1-myristoyl-GPC (14:0)	Lipid	Lysolipid	1.63671	0.250269	6.5398	6.16031e-11	4.78062e-07	3.9034e-09
Gout	274.1	M52470	Known	1-palmitoyl-2-palmitoleoyl-GPC (16:0/16:1)*	Lipid	Phospholipid Metabolism	1.02536	0.189964	5.39767	6.75105e-08	0.000329648	2.61416e-06
Gout	274.1	M33955	Known	1-palmitoyl-GPC (16:0)	Lipid	Lysolipid	1.08198	0.193231	5.59942	2.15066e-08	0.000119061	9.99339e-07
Gout	274.1	M52699	Known	1-stearoyl-2-docosapentaenoyl-GPC (18:0/22:5n3)*	Lipid	Phospholipid Metabolism	0.294743	0.0926688	3.18061	0.00146965	0.514235	0.0341449
Gout	274.1	M33961	Known	1-stearoyl-GPC (18:0)	Lipid	Lysolipid	0.781863	0.212651	3.67673	0.000236239	0.253493	0.00686077
Gout	274.1	M52281	Known	2-hydroxybutyrate/2-hydroxyisobutyrate	Amino Acid	Methionine Cysteine SAM and Taurine Metabolism	1.06309	0.192978	5.50887	3.6115e-08	0.000189094	1.48071e-06
Gout	274.1	M47118	Known	2-palmitoleoyl-GPC (16:1)*	Lipid	Lysolipid	0.638027	0.20366	3.1328	0.0017315	0.544609	0.0389308
Gout	274.1	M35253	Known	2-palmitoyl-GPC (16:0)*	Lipid	Lysolipid	1.88901	0.285548	6.61538	3.7061e-11	2.95522e-07	2.58315e-09
Gout	274.1	M43264	Known	3-hydroxybutyrylcarnitine (1)	Lipid	Fatty Acid Metabolism(Acyl Carnitine)	0.755963	0.23054	3.2791	0.00104137	0.466076	0.0250289
Gout	274.1	M48441	Known	4-hydroxychlorothalonil	Xenobiotics	Chemical	0.867096	0.0616159	14.0726	5.59635e-45	5.40457e-40	9.75164e-43
Gout	274.1	M02831	Known	adenosine 3' 5'-cyclic monophosphate (cAMP)	Nucleotide	Purine Metabolism Adenine containing	-1.31963	0.179317	-7.35924	1.84966e-13	2.02657e-09	1.43246e-11
Gout	274.1	M01107	Known	allantoin	Nucleotide	Purine Metabolism (Hypo)Xanthine/Inosine containing	3.59417	0.331235	10.8508	1.97657e-27	5.72651e-23	1.9681e-25
Gout	274.1	M22176	Known	cysteine s-sulfate	Amino Acid	Methionine Cysteine SAM and Taurine Metabolism	-0.853528	0.280059	-3.04768	0.00230619	0.573008	0.0478645
Gout	274.1	M37063	Known	gamma-glutamylalanine	Peptide	Gamma-glutamyl Amino Acid	0.705446	0.231753	3.04396	0.00233486	0.574795	0.0478645
Gout	274.1	M33364	Known	gamma-glutamylthreonine*	Peptide	Gamma-glutamyl Amino Acid	-1.18405	0.208972	-5.66606	1.46122e-08	8.4669e-05	7.2748e-07
Gout	274.1	M53010	Known	lactosyl-N-palmitoyl-sphingosine	Lipid	Sphingolipid Metabolism	0.346289	0.111423	3.10786	0.00188447	0.552455	0.0410461
Gout	274.1	M01508	Known	pantothenate	Cofactors and Vitamins	Pantothenate and CoA Metabolism	1.47176	0.263831	5.57844	2.4269e-08	0.000131016	1.05722e-06
Gout	274.1	M01806	Known	retinol (Vitamin A)	Cofactors and Vitamins	Vitamin A Metabolism	0.952123	0.202061	4.71206	2.4522e-06	0.00903114	8.13896e-05
Gout	274.1	M33969	Known	stearidonate (18:4n3)	Lipid	Polyunsaturated Fatty Acid (n3 and n6)	0.498655	0.142393	3.50197	0.000461836	0.346939	0.0119222
Gout	274.1	M01284	Known	threonine	Amino Acid	Glycine Serine and Threonine Metabolism	-1.42996	0.240105	-5.95554	2.59221e-09	1.63264e-05	1.38982e-07
Gout	274.1	M01604	Known	urate	Nucleotide	Purine Metabolism (Hypo)Xanthine/Inosine containing	1.6275	0.10684	15.2331	2.13252e-52	3.707e-47	1.48637e-49
Gout	274.1	M47901	Unknown	X - 11485	NA	NA	3.75406	0.256957	14.6097	2.43552e-48	3.02408e-43	8.4878e-46
Gout	274.1	M46471	Unknown	X - 12824	NA	NA	0.254739	0.072615	3.50808	0.000451358	0.34328	0.0119222
Gout	274.1	M46643	Unknown	X - 13529	NA	NA	0.490364	0.138976	3.5284	0.000418074	0.330039	0.0116559
Gout	274.1	M46366	Unknown	X - 18249	NA	NA	1.25722	0.0934536	13.4528	2.96247e-41	1.98066e-36	3.44141e-39
Gout	274.1	M46690	Unknown	X - 18901	NA	NA	1.70266	0.181788	9.36621	7.51857e-21	1.42061e-16	6.55055e-19
Gout	274.1	M46368	Unknown	X - 18914	NA	NA	0.9513	0.0697569	13.6374	2.40065e-42	1.89686e-37	3.34651e-40
Gout	274.1	M46403	Unknown	X - 21358	NA	NA	3.00111	0.21296	14.0924	4.23022e-45	4.59592e-40	9.75164e-43
Gout	274.1	M52053	Unknown	X - 24024	NA	NA	1.08644	0.202207	5.37293	7.74695e-08	0.000374074	2.84191e-06
Gout	274.1	M52126	Unknown	X - 24097	NA	NA	2.24991	0.345981	6.50299	7.87386e-11	6.05632e-07	4.5734e-09
Gout and other crystal arthropathies	274	M52612	Known	1-(1-enyl-stearoyl)-2-oleoyl-GPC (P-18:0/18:1)	Lipid	Plasmalogen	0.752999	0.205468	3.66481	0.000247527	0.261092	0.00690105
Gout and other crystal arthropathies	274	M37231	Known	1-docosapentaenoyl-GPC (22:5n3)*	Lipid	Lysolipid	0.394957	0.128857	3.06509	0.00217601	0.566212	0.0473963
Gout and other crystal arthropathies	274	M45675	Known	1-docosapentaenoyl-GPC (22:5n6)*	Lipid	Lysolipid	0.785047	0.167506	4.68668	2.77672e-06	0.0101404	9.21605e-05
Gout and other crystal arthropathies	274	M45951	Known	1-linolenoyl-GPC (18:3)*	Lipid	Lysolipid	1.21058	0.242565	4.99077	6.01401e-07	0.00248911	2.09588e-05
Gout and other crystal arthropathies	274	M52707	Known	1-myristoyl-2-linoleoyl-GPC (14:0/18:2)*	Lipid	Phospholipid Metabolism	0.531678	0.171239	3.10488	0.00190354	0.552967	0.0427989
Gout and other crystal arthropathies	274	M45453	Known	1-myristoyl-GPC (14:0)	Lipid	Lysolipid	1.66205	0.263896	6.29813	3.01256e-10	2.11161e-06	1.90887e-08
Gout and other crystal arthropathies	274	M52470	Known	1-palmitoyl-2-palmitoleoyl-GPC (16:0/16:1)*	Lipid	Phospholipid Metabolism	1.01599	0.200443	5.06874	4.00464e-07	0.00171461	1.55069e-05
Gout and other crystal arthropathies	274	M33955	Known	1-palmitoyl-GPC (16:0)	Lipid	Lysolipid	1.046	0.203959	5.12848	2.92084e-07	0.00130189	1.19755e-05
Gout and other crystal arthropathies	274	M52699	Known	1-stearoyl-2-docosapentaenoyl-GPC (18:0/22:5n3)*	Lipid	Phospholipid Metabolism	0.368549	0.0979961	3.76085	0.000169335	0.208221	0.00491778
Gout and other crystal arthropathies	274	M52700	Known	1-stearoyl-2-docosapentaenoyl-GPC (18:0/22:5n6)*	Lipid	Phospholipid Metabolism	0.414099	0.132588	3.1232	0.00178895	0.548848	0.0422421
Gout and other crystal arthropathies	274	M33961	Known	1-stearoyl-GPC (18:0)	Lipid	Lysolipid	0.681799	0.223963	3.04424	0.00233265	0.574673	0.0478194
Gout and other crystal arthropathies	274	M52281	Known	2-hydroxybutyrate/2-hydroxyisobutyrate	Amino Acid	Methionine Cysteine SAM and Taurine Metabolism	1.06169	0.203573	5.2153	1.83522e-07	0.000843966	7.99467e-06
Gout and other crystal arthropathies	274	M47118	Known	2-palmitoleoyl-GPC (16:1)*	Lipid	Lysolipid	0.670554	0.215029	3.11843	0.00181817	0.549204	0.0422421
Gout and other crystal arthropathies	274	M35253	Known	2-palmitoyl-GPC (16:0)*	Lipid	Lysolipid	1.91293	0.301244	6.35011	2.15161e-10	1.55841e-06	1.49967e-08
Gout and other crystal arthropathies	274	M48441	Known	4-hydroxychlorothalonil	Xenobiotics	Chemical	0.797676	0.0654389	12.1896	3.53062e-34	1.61509e-29	8.20281e-32
Gout and other crystal arthropathies	274	M02831	Known	adenosine 3' 5'-cyclic monophosphate (cAMP)	Nucleotide	Purine Metabolism Adenine containing	-1.15456	0.188605	-6.12159	9.26488e-10	6.34067e-06	5.38135e-08
Gout and other crystal arthropathies	274	M01107	Known	allantoin	Nucleotide	Purine Metabolism (Hypo)Xanthine/Inosine containing	3.425	0.347385	9.85937	6.24375e-23	1.39149e-18	6.21699e-21
Gout and other crystal arthropathies	274	M01552	Known	erucate (22:1n9)	Lipid	Long Chain Fatty Acid	0.810697	0.257424	3.14926	0.00163683	0.53544	0.0407453
Gout and other crystal arthropathies	274	M33364	Known	gamma-glutamylthreonine*	Peptide	Gamma-glutamyl Amino Acid	-1.29058	0.219344	-5.88381	4.00917e-09	2.47135e-05	2.10993e-07
Gout and other crystal arthropathies	274	M01508	Known	pantothenate	Cofactors and Vitamins	Pantothenate and CoA Metabolism	1.531	0.278755	5.49226	3.96816e-08	0.000201694	1.84387e-06
Gout and other crystal arthropathies	274	M01600	Known	phosphoethanolamine	Lipid	Phospholipid Metabolism	-0.318422	0.105186	-3.02725	0.00246793	0.585315	0.049147
Gout and other crystal arthropathies	274	M01806	Known	retinol (Vitamin A)	Cofactors and Vitamins	Vitamin A Metabolism	0.868348	0.212918	4.07832	4.53628e-05	0.0956978	0.00143718
Gout and other crystal arthropathies	274	M33969	Known	stearidonate (18:4n3)	Lipid	Polyunsaturated Fatty Acid (n3 and n6)	0.588362	0.150672	3.90491	9.4259e-05	0.150877	0.00285646
Gout and other crystal arthropathies	274	M46960	Known	sulfate*	Xenobiotics	Chemical	-0.860853	0.260526	-3.30429	0.00095218	0.451376	0.0255257
Gout and other crystal arthropathies	274	M01284	Known	threonine	Amino Acid	Glycine Serine and Threonine Metabolism	-1.48734	0.253181	-5.87463	4.23801e-09	2.59402e-05	2.10993e-07
Gout and other crystal arthropathies	274	M01604	Known	urate	Nucleotide	Purine Metabolism (Hypo)Xanthine/Inosine containing	1.54509	0.112053	13.7889	2.97192e-43	2.58307e-38	2.07143e-40
Gout and other crystal arthropathies	274	M47901	Unknown	X - 11485	NA	NA	3.40436	0.274409	12.4062	2.41986e-35	1.16847e-30	8.43321e-33
Gout and other crystal arthropathies	274	M46471	Unknown	X - 12824	NA	NA	0.233358	0.0765867	3.04697	0.00231158	0.573008	0.0478194
Gout and other crystal arthropathies	274	M46643	Unknown	X - 13529	NA	NA	0.481247	0.14658	3.28317	0.00102647	0.463403	0.0264983
Gout and other crystal arthropathies	274	M46366	Unknown	X - 18249	NA	NA	1.16417	0.0991544	11.741	7.85296e-32	2.84395e-27	9.12253e-30
Gout and other crystal arthropathies	274	M46690	Unknown	X - 18901	NA	NA	1.51582	0.193567	7.83095	4.842e-15	6.37647e-11	4.2186e-13
Gout and other crystal arthropathies	274	M46368	Unknown	X - 18914	NA	NA	0.87464	0.0741019	11.8032	3.75694e-32	1.41973e-27	5.23718e-30
Gout and other crystal arthropathies	274	M46403	Unknown	X - 21358	NA	NA	2.7564	0.22741	12.1209	8.19026e-34	3.38983e-29	1.42715e-31
Gout and other crystal arthropathies	274	M52053	Unknown	X - 24024	NA	NA	1.0709	0.213286	5.02094	5.14195e-07	0.00214864	1.88628e-05
Gout and other crystal arthropathies	274	M52126	Unknown	X - 24097	NA	NA	2.32855	0.364656	6.38559	1.70737e-10	1.24704e-06	1.32227e-08
Gouty arthropathy	274.11	M45675	Known	1-docosapentaenoyl-GPC (22:5n6)*	Lipid	Lysolipid	0.928021	0.258864	3.58498	0.000337105	0.306804	0.0156641
Gouty arthropathy	274.11	M45453	Known	1-myristoyl-GPC (14:0)	Lipid	Lysolipid	1.68469	0.406895	4.14037	3.46746e-05	0.0810155	0.00201402
Gouty arthropathy	274.11	M52281	Known	2-hydroxybutyrate/2-hydroxyisobutyrate	Amino Acid	Methionine Cysteine SAM and Taurine Metabolism	1.30241	0.313838	4.14993	3.32571e-05	0.0785481	0.00201402
Gouty arthropathy	274.11	M35253	Known	2-palmitoyl-GPC (16:0)*	Lipid	Lysolipid	2.12694	0.465436	4.56977	4.88253e-06	0.0167075	0.000340312
Gouty arthropathy	274.11	M48441	Known	4-hydroxychlorothalonil	Xenobiotics	Chemical	0.970054	0.0980672	9.89173	4.5213e-23	1.03414e-18	1.57567e-20
Gouty arthropathy	274.11	M02831	Known	adenosine 3' 5'-cyclic monophosphate (cAMP)	Nucleotide	Purine Metabolism Adenine containing	-1.49216	0.293206	-5.08913	3.59706e-07	0.001579	2.78572e-05
Gouty arthropathy	274.11	M01107	Known	allantoin	Nucleotide	Purine Metabolism (Hypo)Xanthine/Inosine containing	4.32831	0.555941	7.78556	6.94052e-15	8.74264e-11	6.91078e-13
Gouty arthropathy	274.11	M01508	Known	pantothenate	Cofactors and Vitamins	Pantothenate and CoA Metabolism	1.48662	0.42996	3.45757	0.000545074	0.367712	0.0237448
Gouty arthropathy	274.11	M01806	Known	retinol (Vitamin A)	Cofactors and Vitamins	Vitamin A Metabolism	1.18282	0.329081	3.59431	0.000325256	0.301617	0.0156641
Gouty arthropathy	274.11	M01284	Known	threonine	Amino Acid	Glycine Serine and Threonine Metabolism	-1.28637	0.390311	-3.29575	0.000981593	0.459891	0.0402453
Gouty arthropathy	274.11	M01604	Known	urate	Nucleotide	Purine Metabolism (Hypo)Xanthine/Inosine containing	1.87546	0.177625	10.5585	4.63778e-26	1.30031e-21	3.23253e-23
Gouty arthropathy	274.11	M47901	Unknown	X - 11485	NA	NA	3.78735	0.411452	9.20484	3.42172e-20	6.3277e-16	5.96235e-18
Gouty arthropathy	274.11	M46366	Unknown	X - 18249	NA	NA	1.36321	0.149452	9.12135	7.41961e-20	1.31609e-15	1.03429e-17
Gouty arthropathy	274.11	M46690	Unknown	X - 18901	NA	NA	1.63864	0.293935	5.57482	2.47781e-08	0.000132939	2.15879e-06
Gouty arthropathy	274.11	M46368	Unknown	X - 18914	NA	NA	1.04589	0.111207	9.40484	5.21109e-21	1.04558e-16	1.21071e-18
Gouty arthropathy	274.11	M46403	Unknown	X - 21358	NA	NA	2.98847	0.340546	8.7755	1.70142e-18	2.64072e-14	1.97648e-16
Gouty arthropathy	274.11	M52126	Unknown	X - 24097	NA	NA	2.2862	0.562138	4.06698	4.76262e-05	0.0997568	0.0025535
Heart failure with reduced EF [Systolic or combined heart failure]	428.3	M52669	Known	1-palmitoyl-2-oleoyl-GPI (16:0/18:1)*	Lipid	Phospholipid Metabolism	0.409912	0.0948803	4.32031	1.55813e-05	0.0454449	0.00543007
Heart failure with reduced EF [Systolic or combined heart failure]	428.3	M27719	Known	galactonate	Carbohydrate	Fructose Mannose and Galactose Metabolism	1.31257	0.285713	4.59402	4.34783e-06	0.0150556	0.00303044
Hemorrhage NOS	459.1	M32377	Known	N-acetylneuraminate	Carbohydrate	Aminosugar Metabolism	1.3794	0.309714	4.4538	8.43643e-06	0.0267613	0.00588019
Herpes zoster with nervous system complications	53.1	M18281	Known	2-hydroxyhippurate (salicylurate)	Xenobiotics	Benzoate Metabolism	6.93162	1.66894	4.15331	3.27703e-05	0.0778214	0.0228409
Herpes zoster with nervous system complications	53.1	M46991	Unknown	X - 12814	NA	NA	4.43865	1.12581	3.94264	8.05901e-05	0.136808	0.0280857
Hx of malignant neoplasm of oral cavity and pharynx	149.5	M52974	Known	glycochenodeoxycholate sulfate	Lipid	Primary Bile Acid Metabolism	0.580104	0.143526	4.0418	5.3042e-05	0.104777	0.0369703
Hypercholesterolemia	272.11	M52682	Known	1-(1-enyl-palmitoyl)-2-linoleoyl-GPC (P-16:0/18:2)*	Lipid	Plasmalogen	-0.558945	0.140314	-3.98354	6.78962e-05	0.122503	0.00163185
Hypercholesterolemia	272.11	M52478	Known	1-(1-enyl-palmitoyl)-2-oleoyl-GPC (P-16:0/18:1)*	Lipid	Plasmalogen	-0.632439	0.111834	-5.65516	1.55698e-08	8.96202e-05	7.97948e-07
Hypercholesterolemia	272.11	M52713	Known	1-(1-enyl-palmitoyl)-2-palmitoleoyl-GPC (P-16:0/16:1)*	Lipid	Plasmalogen	-0.294903	0.0512776	-5.75111	8.86597e-09	5.24214e-05	5.14965e-07
Hypercholesterolemia	272.11	M52716	Known	1-(1-enyl-palmitoyl)-2-palmitoyl-GPC (P-16:0/16:0)*	Lipid	Plasmalogen	-0.186773	0.0512503	-3.64434	0.00026808	0.273479	0.00583911
Hypercholesterolemia	272.11	M52612	Known	1-(1-enyl-stearoyl)-2-oleoyl-GPC (P-18:0/18:1)	Lipid	Plasmalogen	0.432569	0.125164	3.45602	0.000548212	0.368225	0.00979753
Hypercholesterolemia	272.11	M44633	Known	1-docosahexaenoyl-GPE (22:6)*	Lipid	Lysolipid	0.238092	0.0704204	3.381	0.000722215	0.414884	0.0119853
Hypercholesterolemia	272.11	M45675	Known	1-docosapentaenoyl-GPC (22:5n6)*	Lipid	Lysolipid	0.433429	0.099463	4.3577	1.31439e-05	0.0398054	0.000390067
Hypercholesterolemia	272.11	M45951	Known	1-linolenoyl-GPC (18:3)*	Lipid	Lysolipid	0.572021	0.150996	3.78832	0.000151669	0.196168	0.00352378
Hypercholesterolemia	272.11	M45453	Known	1-myristoyl-GPC (14:0)	Lipid	Lysolipid	0.693551	0.159756	4.34132	1.41628e-05	0.0424052	0.000394859
Hypercholesterolemia	272.11	M46798	Known	1-oleoyl-2-linoleoyl-glycerol (18:1/18:2)	Lipid	Diacylglycerol	0.449249	0.0851923	5.27335	1.33953e-07	0.000636211	5.83534e-06
Hypercholesterolemia	272.11	M46799	Known	1-oleoyl-3-linoleoyl-glycerol (18:1/18:2)	Lipid	Diacylglycerol	0.425377	0.0923954	4.60388	4.14691e-06	0.0144173	0.000137638
Hypercholesterolemia	272.11	M52683	Known	1-palmitoleoyl-2-linoleoyl-GPC (16:1/18:2)*	Lipid	Phospholipid Metabolism	-0.253915	0.0746521	-3.40131	0.000670635	0.403942	0.0114008
Hypercholesterolemia	272.11	M52470	Known	1-palmitoyl-2-palmitoleoyl-GPC (16:0/16:1)*	Lipid	Phospholipid Metabolism	0.523254	0.12172	4.29883	1.71704e-05	0.048297	0.000460298
Hypercholesterolemia	272.11	M52616	Known	1-palmitoyl-2-stearoyl-GPC (16:0/18:0)	Lipid	Phospholipid Metabolism	0.620521	0.103558	5.99201	2.07265e-09	1.34578e-05	1.60516e-07
Hypercholesterolemia	272.11	M52634	Known	1-palmitoyl-3-linoleoyl-glycerol (16:0/18:2)*	Lipid	Diacylglycerol	0.628249	0.111191	5.65018	1.60276e-08	9.16485e-05	7.97948e-07
Hypercholesterolemia	272.11	M33955	Known	1-palmitoyl-GPC (16:0)	Lipid	Lysolipid	0.536323	0.123209	4.35296	1.34313e-05	0.0405345	0.000390067
Hypercholesterolemia	272.11	M52449	Known	1-stearoyl-2-arachidonoyl-GPI (18:0/20:4)	Lipid	Phospholipid Metabolism	0.170467	0.0499752	3.41102	0.000647199	0.39614	0.0112774
Hypercholesterolemia	272.11	M52466	Known	1-stearoyl-2-docosahexaenoyl-GPE (18:0/22:6)*	Lipid	Phospholipid Metabolism	0.13257	0.0449728	2.94778	0.00320065	0.621647	0.0437422
Hypercholesterolemia	272.11	M42448	Known	1-stearoyl-2-oleoyl-GPE (18:0/18:1)	Lipid	Phospholipid Metabolism	0.259517	0.082125	3.16002	0.00157756	0.52776	0.0229075
Hypercholesterolemia	272.11	M33961	Known	1-stearoyl-GPC (18:0)	Lipid	Lysolipid	0.449701	0.133499	3.36857	0.000755604	0.421026	0.0121216
Hypercholesterolemia	272.11	M35253	Known	2-palmitoyl-GPC (16:0)*	Lipid	Lysolipid	0.626941	0.180283	3.47754	0.000506045	0.357008	0.00953279
Hypercholesterolemia	272.11	M48492	Known	behenoyl sphingomyelin (d18:1/22:0)*	Lipid	Sphingolipid Metabolism	1.38337	0.173539	7.97151	1.56746e-15	2.09596e-11	1.56074e-13
Hypercholesterolemia	272.11	M00063	Known	cholesterol	Lipid	Sterol	1.2409	0.0828587	14.9762	1.05118e-50	1.52273e-45	7.3267e-48
Hypercholesterolemia	272.11	M27719	Known	galactonate	Carbohydrate	Fructose Mannose and Galactose Metabolism	-1.01803	0.197825	-5.14611	2.65941e-07	0.00119147	1.02978e-05
Hypercholesterolemia	272.11	M33364	Known	gamma-glutamylthreonine*	Peptide	Gamma-glutamyl Amino Acid	-0.562273	0.136562	-4.11734	3.83275e-05	0.0865264	0.000954081
Hypercholesterolemia	272.11	M15990	Known	glycerophosphorylcholine (GPC)	Lipid	Phospholipid Metabolism	0.46072	0.136912	3.36508	0.000765209	0.422547	0.0121216
Hypercholesterolemia	272.11	M53013	Known	glycosyl-N-palmitoyl-sphingosine	Lipid	Sphingolipid Metabolism	0.184001	0.0514006	3.57974	0.00034393	0.308484	0.00705056
Hypercholesterolemia	272.11	M53010	Known	lactosyl-N-palmitoyl-sphingosine	Lipid	Sphingolipid Metabolism	0.469597	0.0705173	6.65932	2.75094e-11	2.25567e-07	2.39676e-09
Hypercholesterolemia	272.11	M44877	Known	N-palmitoyl-sphingosine (d18:1/16:0)	Lipid	Sphingolipid Metabolism	1.05902	0.106777	9.91807	3.47425e-23	8.16128e-19	6.05388e-21
Hypercholesterolemia	272.11	M40469	Known	N1-Methyl-2-pyridone-5-carboxamide	Cofactors and Vitamins	Nicotinate and Nicotinamide Metabolism	-0.6698	0.205585	-3.25803	0.0011219	0.476129	0.0169993
Hypercholesterolemia	272.11	M33447	Known	palmitoleate (16:1n7)	Lipid	Long Chain Fatty Acid	-0.861906	0.193016	-4.46547	7.98947e-06	0.0257157	0.000253121
Hypercholesterolemia	272.11	M52434	Known	palmitoyl dihydrosphingomyelin (d18:0/16:0)*	Lipid	Sphingolipid Metabolism	0.834014	0.0761183	10.9568	6.16372e-28	1.84733e-23	1.43204e-25
Hypercholesterolemia	272.11	M37506	Known	palmitoyl sphingomyelin (d18:1/16:0)	Lipid	Sphingolipid Metabolism	1.09042	0.0805877	13.5308	1.02831e-41	7.44806e-37	3.58367e-39
Hypercholesterolemia	272.11	M01806	Known	retinol (Vitamin A)	Cofactors and Vitamins	Vitamin A Metabolism	0.545281	0.12742	4.27938	1.87411e-05	0.0518757	0.000483797
Hypercholesterolemia	272.11	M52433	Known	sphingomyelin (d18:1/15:0 d16:1/17:0)*	Lipid	Sphingolipid Metabolism	0.201919	0.0678901	2.97421	0.00293747	0.61157	0.0409484
Hypercholesterolemia	272.11	M52615	Known	sphingomyelin (d18:1/17:0 d17:1/18:0 d19:1/16:0)	Lipid	Sphingolipid Metabolism	0.86962	0.0952498	9.12988	6.85726e-20	1.24168e-15	9.55902e-18
Hypercholesterolemia	272.11	M48490	Known	sphingomyelin (d18:1/20:0 d16:1/22:0)*	Lipid	Sphingolipid Metabolism	0.356138	0.0616394	5.77776	7.57012e-09	4.56656e-05	4.82724e-07
Hypercholesterolemia	272.11	M48491	Known	sphingomyelin (d18:1/20:1 d18:2/20:0)*	Lipid	Sphingolipid Metabolism	0.154533	0.0527847	2.92761	0.00341573	0.63167	0.0457839
Hypercholesterolemia	272.11	M48493	Known	sphingomyelin (d18:1/22:1 d18:2/22:0 d16:1/24:1)*	Lipid	Sphingolipid Metabolism	0.482956	0.104507	4.62128	3.81383e-06	0.0134204	0.000132912
Hypercholesterolemia	272.11	M52435	Known	sphingomyelin (d18:2/23:0 d18:1/23:1 d17:1/24:1)*	Lipid	Sphingolipid Metabolism	0.761979	0.131906	5.77669	7.61831e-09	4.56656e-05	4.82724e-07
Hypercholesterolemia	272.11	M33969	Known	stearidonate (18:4n3)	Lipid	Polyunsaturated Fatty Acid (n3 and n6)	0.323234	0.089147	3.62585	0.000288014	0.283821	0.0060832
Hypercholesterolemia	272.11	M19503	Known	stearoyl sphingomyelin (d18:1/18:0)	Lipid	Sphingolipid Metabolism	0.578001	0.0714613	8.08832	6.04957e-16	8.43965e-12	7.02758e-14
Hypercholesterolemia	272.11	M01284	Known	threonine	Amino Acid	Glycine Serine and Threonine Metabolism	-0.786652	0.152475	-5.15923	2.4797e-07	0.00112253	1.01668e-05
Hypercholesterolemia	272.11	M02761	Known	thyroxine	Amino Acid	Phenylalanine and Tyrosine Metabolism	0.402717	0.116248	3.46429	0.000531639	0.363608	0.00975137
Hypercholesterolemia	272.11	M01649	Known	valine	Amino Acid	Leucine Isoleucine and Valine Metabolism	-0.925277	0.264599	-3.4969	0.000470698	0.350329	0.00937362
Hypercholesterolemia	272.11	M47709	Unknown	X - 12339	NA	NA	-0.318778	0.100808	-3.16224	0.0015656	0.526223	0.0229075
Hypercholesterolemia	272.11	M46621	Unknown	X - 12524	NA	NA	0.629586	0.205115	3.06944	0.00214464	0.564729	0.0305063
Hypercholesterolemia	272.11	M47715	Unknown	X - 12681	NA	NA	-0.278801	0.0741242	-3.76127	0.000169054	0.208221	0.00380099
Hypercholesterolemia	272.11	M46643	Unknown	X - 13529	NA	NA	0.289457	0.0872501	3.31755	0.000908097	0.444916	0.0140654
Hypercholesterolemia	272.11	M46371	Unknown	X - 21327	NA	NA	0.621163	0.178456	3.48077	0.000499967	0.356017	0.00953279
Hypercholesterolemia	272.11	M52053	Unknown	X - 24024	NA	NA	0.691417	0.130374	5.30335	1.13694e-07	0.000542959	5.283e-06
Hypercholesterolemia	272.11	M52126	Unknown	X - 24097	NA	NA	1.10835	0.2214	5.00611	5.55414e-07	0.00230977	2.03749e-05
Hyperglyceridemia	272.12	M52478	Known	1-(1-enyl-palmitoyl)-2-oleoyl-GPC (P-16:0/18:1)*	Lipid	Plasmalogen	-1.44008	0.37079	-3.88381	0.000102834	0.158765	0.00716755
Hyperglyceridemia	272.12	M46798	Known	1-oleoyl-2-linoleoyl-glycerol (18:1/18:2)	Lipid	Diacylglycerol	2.30103	0.253883	9.06337	1.26485e-19	2.1556e-15	8.81599e-17
Hyperglyceridemia	272.12	M46799	Known	1-oleoyl-3-linoleoyl-glycerol (18:1/18:2)	Lipid	Diacylglycerol	2.447	0.276905	8.83699	9.8329e-19	1.58266e-14	3.42676e-16
Hyperglyceridemia	272.12	M52633	Known	1-palmitoyl-2-linoleoyl-glycerol (16:0/18:2)*	Lipid	Diacylglycerol	2.35938	0.304428	7.75022	9.17299e-15	1.12293e-10	2.13119e-12
Hyperglyceridemia	272.12	M42446	Known	1-palmitoyl-2-linoleoyl-GPC (16:0/18:2)	Lipid	Phospholipid Metabolism	0.909426	0.256616	3.54392	0.000394221	0.32419	0.0228977
Hyperglyceridemia	272.12	M52616	Known	1-palmitoyl-2-stearoyl-GPC (16:0/18:0)	Lipid	Phospholipid Metabolism	1.16053	0.33646	3.44924	0.000562157	0.373265	0.0301402
Hyperglyceridemia	272.12	M52634	Known	1-palmitoyl-3-linoleoyl-glycerol (16:0/18:2)*	Lipid	Diacylglycerol	2.46383	0.338009	7.28927	3.11649e-13	3.22467e-09	5.43048e-11
Hyperglyceridemia	272.12	M33364	Known	gamma-glutamylthreonine*	Peptide	Gamma-glutamyl Amino Acid	-1.73941	0.430768	-4.03792	5.3928e-05	0.104859	0.00536969
Hyperglyceridemia	272.12	M44877	Known	N-palmitoyl-sphingosine (d18:1/16:0)	Lipid	Sphingolipid Metabolism	1.7452	0.333726	5.22944	1.70028e-07	0.000790274	1.97516e-05
Hyperglyceridemia	272.12	M01284	Known	threonine	Amino Acid	Glycine Serine and Threonine Metabolism	-1.84686	0.499652	-3.69629	0.000218777	0.241394	0.0138625
Hyperglyceridemia	272.12	M46621	Unknown	X - 12524	NA	NA	3.93476	0.611102	6.43879	1.20428e-10	8.94621e-07	1.67876e-08
Hyperglyceridemia	272.12	M47715	Unknown	X - 12681	NA	NA	0.957823	0.241391	3.96794	7.24968e-05	0.127553	0.00561448
Hyperglyceridemia	272.12	M52053	Unknown	X - 24024	NA	NA	1.64936	0.412475	3.99869	6.3693e-05	0.117039	0.00554925
Hyperlipidemia	272.1	M52682	Known	1-(1-enyl-palmitoyl)-2-linoleoyl-GPC (P-16:0/18:2)*	Lipid	Plasmalogen	-0.384552	0.0990822	-3.88114	0.000103967	0.159936	0.00201292
Hyperlipidemia	272.1	M52478	Known	1-(1-enyl-palmitoyl)-2-oleoyl-GPC (P-16:0/18:1)*	Lipid	Plasmalogen	-0.442526	0.0790883	-5.59534	2.20186e-08	0.000121124	9.02762e-07
Hyperlipidemia	272.1	M52713	Known	1-(1-enyl-palmitoyl)-2-palmitoleoyl-GPC (P-16:0/16:1)*	Lipid	Plasmalogen	-0.146305	0.0362317	-4.03805	5.38979e-05	0.104859	0.00125223
Hyperlipidemia	272.1	M52612	Known	1-(1-enyl-stearoyl)-2-oleoyl-GPC (P-18:0/18:1)	Lipid	Plasmalogen	0.323068	0.0884793	3.65134	0.000260871	0.270705	0.00466224
Hyperlipidemia	272.1	M44633	Known	1-docosahexaenoyl-GPE (22:6)*	Lipid	Lysolipid	0.143215	0.0497838	2.87674	0.0040181	0.65122	0.0482864
Hyperlipidemia	272.1	M45675	Known	1-docosapentaenoyl-GPC (22:5n6)*	Lipid	Lysolipid	0.279202	0.0701557	3.97975	6.8989e-05	0.123909	0.00145713
Hyperlipidemia	272.1	M45951	Known	1-linolenoyl-GPC (18:3)*	Lipid	Lysolipid	0.424627	0.108523	3.9128	9.12332e-05	0.147591	0.00181684
Hyperlipidemia	272.1	M45453	Known	1-myristoyl-GPC (14:0)	Lipid	Lysolipid	0.522474	0.112847	4.62994	3.65776e-06	0.0130294	0.000106228
Hyperlipidemia	272.1	M46798	Known	1-oleoyl-2-linoleoyl-glycerol (18:1/18:2)	Lipid	Diacylglycerol	0.488954	0.0600529	8.14206	3.88625e-16	5.62961e-12	3.38589e-14
Hyperlipidemia	272.1	M46799	Known	1-oleoyl-3-linoleoyl-glycerol (18:1/18:2)	Lipid	Diacylglycerol	0.491788	0.065114	7.55272	4.26255e-14	4.87478e-10	2.28538e-12
Hyperlipidemia	272.1	M35628	Known	1-oleoyl-GPE (18:1)	Lipid	Lysolipid	0.522631	0.143431	3.64378	0.00026866	0.273749	0.0046814
Hyperlipidemia	272.1	M52683	Known	1-palmitoleoyl-2-linoleoyl-GPC (16:1/18:2)*	Lipid	Phospholipid Metabolism	-0.172107	0.0526519	-3.26878	0.00108012	0.470316	0.0150569
Hyperlipidemia	272.1	M52633	Known	1-palmitoyl-2-linoleoyl-glycerol (16:0/18:2)*	Lipid	Diacylglycerol	0.219682	0.0710612	3.09144	0.00199187	0.55968	0.026195
Hyperlipidemia	272.1	M52470	Known	1-palmitoyl-2-palmitoleoyl-GPC (16:0/16:1)*	Lipid	Phospholipid Metabolism	0.43239	0.0860822	5.02299	5.08722e-07	0.00213604	1.61172e-05
Hyperlipidemia	272.1	M52616	Known	1-palmitoyl-2-stearoyl-GPC (16:0/18:0)	Lipid	Phospholipid Metabolism	0.561086	0.0730164	7.68438	1.53736e-14	1.83043e-10	9.74128e-13
Hyperlipidemia	272.1	M52634	Known	1-palmitoyl-3-linoleoyl-glycerol (16:0/18:2)*	Lipid	Diacylglycerol	0.596605	0.0787391	7.57698	3.53688e-14	4.09881e-10	2.05434e-12
Hyperlipidemia	272.1	M33955	Known	1-palmitoyl-GPC (16:0)	Lipid	Lysolipid	0.449682	0.0864628	5.20087	1.98353e-07	0.000902619	6.58343e-06
Hyperlipidemia	272.1	M52447	Known	1-stearoyl-2-arachidonoyl-GPE (18:0/20:4)	Lipid	Phospholipid Metabolism	0.111084	0.0275816	4.02746	5.63828e-05	0.107942	0.00126022
Hyperlipidemia	272.1	M52449	Known	1-stearoyl-2-arachidonoyl-GPI (18:0/20:4)	Lipid	Phospholipid Metabolism	0.141595	0.0352105	4.02138	5.7858e-05	0.109799	0.00126022
Hyperlipidemia	272.1	M52466	Known	1-stearoyl-2-docosahexaenoyl-GPE (18:0/22:6)*	Lipid	Phospholipid Metabolism	0.13559	0.031757	4.26962	1.95808e-05	0.0533507	0.000524917
Hyperlipidemia	272.1	M52699	Known	1-stearoyl-2-docosapentaenoyl-GPC (18:0/22:5n3)*	Lipid	Phospholipid Metabolism	0.138783	0.0413275	3.35812	0.000784738	0.427955	0.0116375
Hyperlipidemia	272.1	M52438	Known	1-stearoyl-2-oleoyl-GPC (18:0/18:1)	Lipid	Phospholipid Metabolism	0.403957	0.114517	3.52748	0.000419542	0.330597	0.00664592
Hyperlipidemia	272.1	M42448	Known	1-stearoyl-2-oleoyl-GPE (18:0/18:1)	Lipid	Phospholipid Metabolism	0.239841	0.0578465	4.14616	3.38104e-05	0.0794233	0.000872809
Hyperlipidemia	272.1	M33961	Known	1-stearoyl-GPC (18:0)	Lipid	Lysolipid	0.304116	0.0937463	3.24403	0.0011785	0.485585	0.0161062
Hyperlipidemia	272.1	M42398	Known	1-stearoyl-GPE (18:0)	Lipid	Lysolipid	0.123138	0.0422169	2.9168	0.00353645	0.636999	0.043244
Hyperlipidemia	272.1	M52281	Known	2-hydroxybutyrate/2-hydroxyisobutyrate	Amino Acid	Methionine Cysteine SAM and Taurine Metabolism	0.261917	0.0863263	3.03403	0.00241307	0.581252	0.0311465
Hyperlipidemia	272.1	M35253	Known	2-palmitoyl-GPC (16:0)*	Lipid	Lysolipid	0.439414	0.127142	3.45609	0.000548078	0.368225	0.00830458
Hyperlipidemia	272.1	M45452	Known	2-palmitoyl-GPE (16:0)*	Lipid	Lysolipid	0.153296	0.0464961	3.29696	0.000977389	0.458202	0.0139029
Hyperlipidemia	272.1	M48492	Known	behenoyl sphingomyelin (d18:1/22:0)*	Lipid	Sphingolipid Metabolism	1.12071	0.117609	9.52916	1.58557e-21	3.36125e-17	1.57878e-19
Hyperlipidemia	272.1	M33997	Known	campesterol	Lipid	Sterol	0.15015	0.0416414	3.6058	0.000311196	0.29545	0.00516437
Hyperlipidemia	272.1	M00063	Known	cholesterol	Lipid	Sterol	0.963602	0.0577036	16.6992	1.32894e-62	1.15506e-56	9.26272e-60
Hyperlipidemia	272.1	M33364	Known	gamma-glutamylthreonine*	Peptide	Gamma-glutamyl Amino Acid	-0.435431	0.0965558	-4.50963	6.4942e-06	0.0215126	0.000181058
Hyperlipidemia	272.1	M15990	Known	glycerophosphorylcholine (GPC)	Lipid	Phospholipid Metabolism	0.349039	0.0966656	3.61079	0.000305269	0.291889	0.00516437
Hyperlipidemia	272.1	M53013	Known	glycosyl-N-palmitoyl-sphingosine	Lipid	Sphingolipid Metabolism	0.121546	0.0364006	3.33912	0.000840429	0.438719	0.0122037
Hyperlipidemia	272.1	M53010	Known	lactosyl-N-palmitoyl-sphingosine	Lipid	Sphingolipid Metabolism	0.302321	0.0495153	6.1056	1.02414e-09	6.95423e-06	4.46141e-08
Hyperlipidemia	272.1	M44877	Known	N-palmitoyl-sphingosine (d18:1/16:0)	Lipid	Sphingolipid Metabolism	0.965537	0.0759054	12.7203	4.56303e-37	2.33294e-32	1.06014e-34
Hyperlipidemia	272.1	M33447	Known	palmitoleate (16:1n7)	Lipid	Long Chain Fatty Acid	-0.564872	0.137655	-4.10355	4.06859e-05	0.0888505	0.00101279
Hyperlipidemia	272.1	M52434	Known	palmitoyl dihydrosphingomyelin (d18:0/16:0)*	Lipid	Sphingolipid Metabolism	0.608723	0.0526949	11.5518	7.22567e-31	2.32602e-26	1.00726e-28
Hyperlipidemia	272.1	M37506	Known	palmitoyl sphingomyelin (d18:1/16:0)	Lipid	Sphingolipid Metabolism	0.86883	0.0558704	15.5508	1.57114e-54	4.55189e-49	5.47541e-52
Hyperlipidemia	272.1	M01806	Known	retinol (Vitamin A)	Cofactors and Vitamins	Vitamin A Metabolism	0.289775	0.0899619	3.22108	0.00127708	0.497752	0.0171178
Hyperlipidemia	272.1	M17769	Known	sphinganine	Lipid	Sphingolipid Metabolism	0.533552	0.153186	3.48305	0.000495743	0.356017	0.00767851
Hyperlipidemia	272.1	M42463	Known	sphingomyelin (d18:1/14:0 d16:1/16:0)*	Lipid	Sphingolipid Metabolism	0.15324	0.0430639	3.55843	0.000373081	0.316976	0.00604738
Hyperlipidemia	272.1	M52433	Known	sphingomyelin (d18:1/15:0 d16:1/17:0)*	Lipid	Sphingolipid Metabolism	0.231725	0.0481666	4.81089	1.50256e-06	0.00577861	4.55342e-05
Hyperlipidemia	272.1	M52615	Known	sphingomyelin (d18:1/17:0 d17:1/18:0 d19:1/16:0)	Lipid	Sphingolipid Metabolism	0.78016	0.0674353	11.569	5.91559e-31	1.97753e-26	1.00726e-28
Hyperlipidemia	272.1	M48490	Known	sphingomyelin (d18:1/20:0 d16:1/22:0)*	Lipid	Sphingolipid Metabolism	0.349008	0.0437003	7.98642	1.38918e-15	1.88659e-11	9.6826e-14
Hyperlipidemia	272.1	M48491	Known	sphingomyelin (d18:1/20:1 d18:2/20:0)*	Lipid	Sphingolipid Metabolism	0.150806	0.0372998	4.04308	5.27526e-05	0.104681	0.00125223
Hyperlipidemia	272.1	M52495	Known	sphingomyelin (d18:1/21:0 d17:1/22:0 d16:1/23:0)*	Lipid	Sphingolipid Metabolism	0.168099	0.0427425	3.93282	8.3954e-05	0.140056	0.00172106
Hyperlipidemia	272.1	M48493	Known	sphingomyelin (d18:1/22:1 d18:2/22:0 d16:1/24:1)*	Lipid	Sphingolipid Metabolism	0.497946	0.0742338	6.7078	1.97576e-11	1.6512e-07	9.83645e-10
Hyperlipidemia	272.1	M52435	Known	sphingomyelin (d18:2/23:0 d18:1/23:1 d17:1/24:1)*	Lipid	Sphingolipid Metabolism	0.759044	0.0934532	8.12218	4.57897e-16	6.52435e-12	3.54616e-14
Hyperlipidemia	272.1	M33969	Known	stearidonate (18:4n3)	Lipid	Polyunsaturated Fatty Acid (n3 and n6)	0.239118	0.0629564	3.79815	0.000145781	0.19169	0.0027462
Hyperlipidemia	272.1	M19503	Known	stearoyl sphingomyelin (d18:1/18:0)	Lipid	Sphingolipid Metabolism	0.528296	0.050468	10.4679	1.21255e-25	3.29342e-21	1.40857e-23
Hyperlipidemia	272.1	M01284	Known	threonine	Amino Acid	Glycine Serine and Threonine Metabolism	-0.57077	0.107589	-5.30507	1.12627e-07	0.000540835	4.13165e-06
Hyperlipidemia	272.1	M01649	Known	valine	Amino Acid	Leucine Isoleucine and Valine Metabolism	-0.553142	0.188357	-2.93667	0.00331758	0.627531	0.041292
Hyperlipidemia	272.1	M46598	Unknown	X - 11438	NA	NA	0.294375	0.0990337	2.97247	0.00295415	0.61157	0.0374371
Hyperlipidemia	272.1	M46621	Unknown	X - 12524	NA	NA	0.760193	0.144657	5.25515	1.47907e-07	0.000698667	5.15456e-06
Hyperlipidemia	272.1	M47715	Unknown	X - 12681	NA	NA	-0.193663	0.0524901	-3.68952	0.000224678	0.245327	0.00412106
Hyperlipidemia	272.1	M52053	Unknown	X - 24024	NA	NA	0.612349	0.0920852	6.64981	2.93476e-11	2.3839e-07	1.36368e-09
Hyperlipidemia	272.1	M52126	Unknown	X - 24097	NA	NA	0.845128	0.156952	5.38463	7.25935e-08	0.000352488	2.81098e-06
Hypertensive chronic kidney disease	401.22	M22176	Known	cysteine s-sulfate	Amino Acid	Methionine Cysteine SAM and Taurine Metabolism	-1.07072	0.265939	-4.02619	5.66879e-05	0.10805	0.0395115
Hypertensive heart disease	401.21	M52612	Known	1-(1-enyl-stearoyl)-2-oleoyl-GPC (P-18:0/18:1)	Lipid	Plasmalogen	0.786562	0.17541	4.48414	7.32091e-06	0.0238848	0.00510267
Hypertensive heart disease	401.21	M15745	Known	methylsuccinate	Amino Acid	Leucine Isoleucine and Valine Metabolism	0.265581	0.0695173	3.82037	0.000133254	0.182392	0.0309594
Hypertensive heart disease	401.21	M33447	Known	palmitoleate (16:1n7)	Lipid	Long Chain Fatty Acid	-1.11498	0.268988	-4.14509	3.39681e-05	0.0795787	0.0118379
Hypothyroidism	244	M19130	Known	1 2-dipalmitoyl-GPC (16:0/16:0)	Lipid	Phospholipid Metabolism	0.451688	0.0951584	4.74669	2.0677e-06	0.00771313	0.00144119
Hypothyroidism NOS	244.4	M19130	Known	1 2-dipalmitoyl-GPC (16:0/16:0)	Lipid	Phospholipid Metabolism	0.459769	0.0937342	4.90502	9.34161e-07	0.00372447	0.00065111
Impacted cerumen	380.4	M27719	Known	galactonate	Carbohydrate	Fructose Mannose and Galactose Metabolism	-1.45393	0.379017	-3.83607	0.000125019	0.178426	0.0435691
Impacted cerumen	380.4	M52636	Unknown	X - 24422	NA	NA	0.455654	0.112048	4.06659	4.77056e-05	0.0997568	0.0332508
Infection with drug-resistant microorganisms	41.9	M52467	Known	1-palmitoyl-2-arachidonoyl-GPI (16:0/20:4)*	Lipid	Phospholipid Metabolism	-0.905142	0.223668	-4.0468	5.19218e-05	0.103743	0.0361895
Inflammatory bowel disease and other gastroenteritis and colitis	555	M52603	Known	1 2-dilinoleoyl-GPC (18:2/18:2)	Lipid	Phospholipid Metabolism	0.443465	0.125885	3.52277	0.000427066	0.333502	0.00875484
Inflammatory bowel disease and other gastroenteritis and colitis	555	M19130	Known	1 2-dipalmitoyl-GPC (16:0/16:0)	Lipid	Phospholipid Metabolism	-0.541405	0.171322	-3.16016	0.00157684	0.52776	0.0232631
Inflammatory bowel disease and other gastroenteritis and colitis	555	M19132	Known	1 2-distearoyl-GPC (18:0/18:0)	Lipid	Phospholipid Metabolism	-0.989149	0.275372	-3.59205	0.000328085	0.303037	0.00762251
Inflammatory bowel disease and other gastroenteritis and colitis	555	M52673	Known	1-(1-enyl-palmitoyl)-2-arachidonoyl-GPE (P-16:0/20:4)*	Lipid	Plasmalogen	-0.594017	0.155119	-3.82942	0.000128445	0.180018	0.00433341
Inflammatory bowel disease and other gastroenteritis and colitis	555	M52613	Known	1-(1-enyl-stearoyl)-2-arachidonoyl-GPC (P-18:0/20:4)	Lipid	Plasmalogen	-0.320548	0.0852246	-3.76121	0.000169092	0.208221	0.00471428
Inflammatory bowel disease and other gastroenteritis and colitis	555	M52475	Known	1-(1-enyl-stearoyl)-2-arachidonoyl-GPE (P-18:0/20:4)*	Lipid	Plasmalogen	-0.60733	0.150377	-4.03873	5.37413e-05	0.104859	0.00340524
Inflammatory bowel disease and other gastroenteritis and colitis	555	M52748	Known	1-(1-enyl-stearoyl)-2-linoleoyl-GPE (P-18:0/18:2)*	Lipid	Plasmalogen	0.491545	0.170018	2.89113	0.00383854	0.647791	0.0477761
Inflammatory bowel disease and other gastroenteritis and colitis	555	M52698	Known	1-adrenoyl-GPC (22:4)*	Lipid	Lysolipid	-0.60249	0.157462	-3.82626	0.000130103	0.180691	0.00433341
Inflammatory bowel disease and other gastroenteritis and colitis	555	M33228	Known	1-arachidonoyl-GPC (20:4n6)*	Lipid	Lysolipid	-0.248523	0.0599078	-4.14842	3.34775e-05	0.0788543	0.0032554
Inflammatory bowel disease and other gastroenteritis and colitis	555	M35186	Known	1-arachidonoyl-GPE (20:4n6)*	Lipid	Lysolipid	-0.276924	0.0881433	-3.14175	0.00167943	0.539685	0.023889
Inflammatory bowel disease and other gastroenteritis and colitis	555	M34214	Known	1-arachidonoyl-GPI (20:4)*	Lipid	Lysolipid	-0.304025	0.105941	-2.86976	0.00410787	0.652216	0.0493653
Inflammatory bowel disease and other gastroenteritis and colitis	555	M34397	Known	1-arachidonylglycerol (20:4)	Lipid	Monoacylglycerol	-0.599711	0.181227	-3.30917	0.000935717	0.449706	0.0151673
Inflammatory bowel disease and other gastroenteritis and colitis	555	M33822	Known	1-docosahexaenoyl-GPC (22:6)*	Lipid	Lysolipid	-0.679426	0.14723	-4.61471	3.93642e-06	0.0137404	0.00274368
Inflammatory bowel disease and other gastroenteritis and colitis	555	M45675	Known	1-docosapentaenoyl-GPC (22:5n6)*	Lipid	Lysolipid	-0.536061	0.171707	-3.12195	0.00179657	0.549052	0.0245531
Inflammatory bowel disease and other gastroenteritis and colitis	555	M44563	Known	1-eicosapentaenoyl-GPC (20:5)*	Lipid	Lysolipid	-0.342811	0.0896144	-3.8254	0.000130562	0.180987	0.00433341
Inflammatory bowel disease and other gastroenteritis and colitis	555	M47888	Known	1-eicosapentaenoyl-GPE (20:5)*	Lipid	Lysolipid	-0.546895	0.182348	-2.99919	0.00270702	0.602518	0.0355999
Inflammatory bowel disease and other gastroenteritis and colitis	555	M49617	Known	1-lignoceroyl-GPC (24:0)	Lipid	Lysolipid	-1.25327	0.376901	-3.32521	0.000883529	0.443372	0.01502
Inflammatory bowel disease and other gastroenteritis and colitis	555	M52710	Known	1-linoleoyl-2-arachidonoyl-GPC (18:2/20:4n6)*	Lipid	Phospholipid Metabolism	-0.557526	0.137828	-4.04507	5.23071e-05	0.104035	0.00340524
Inflammatory bowel disease and other gastroenteritis and colitis	555	M36600	Known	1-linoleoyl-GPE (18:2)*	Lipid	Lysolipid	0.71271	0.183841	3.87677	0.000105852	0.161975	0.00433341
Inflammatory bowel disease and other gastroenteritis and colitis	555	M36594	Known	1-linoleoyl-GPI (18:2)*	Lipid	Lysolipid	0.430674	0.14606	2.94861	0.00319204	0.621647	0.0404518
Inflammatory bowel disease and other gastroenteritis and colitis	555	M52707	Known	1-myristoyl-2-linoleoyl-GPC (14:0/18:2)*	Lipid	Phospholipid Metabolism	0.627783	0.176553	3.55577	0.000376873	0.317406	0.0081659
Inflammatory bowel disease and other gastroenteritis and colitis	555	M52451	Known	1-oleoyl-2-linoleoyl-GPI (18:1/18:2)*	Lipid	Phospholipid Metabolism	0.536895	0.150461	3.56833	0.000359259	0.313193	0.00807753
Inflammatory bowel disease and other gastroenteritis and colitis	555	M52683	Known	1-palmitoleoyl-2-linoleoyl-GPC (16:1/18:2)*	Lipid	Phospholipid Metabolism	0.422393	0.127413	3.31514	0.000915959	0.445149	0.0151673
Inflammatory bowel disease and other gastroenteritis and colitis	555	M52462	Known	1-palmitoyl-2-arachidonoyl-GPC (16:0/20:4)	Lipid	Phospholipid Metabolism	-0.256513	0.0659628	-3.88876	0.000100759	0.156155	0.00433341
Inflammatory bowel disease and other gastroenteritis and colitis	555	M52610	Known	1-palmitoyl-2-docosahexaenoyl-GPC (16:0/22:6)	Lipid	Phospholipid Metabolism	-0.768657	0.184694	-4.16179	3.15768e-05	0.0770933	0.0032554
Inflammatory bowel disease and other gastroenteritis and colitis	555	M52463	Known	1-palmitoyl-2-eicosapentaenoyl-GPC (16:0/20:5)*	Lipid	Phospholipid Metabolism	-0.325186	0.10404	-3.12558	0.00177455	0.54672	0.0245531
Inflammatory bowel disease and other gastroenteritis and colitis	555	M52684	Known	1-palmitoyl-2-linolenoyl-GPC (16:0/18:3)*	Lipid	Phospholipid Metabolism	0.433323	0.114866	3.77241	0.000161677	0.203657	0.00469538
Inflammatory bowel disease and other gastroenteritis and colitis	555	M42446	Known	1-palmitoyl-2-linoleoyl-GPC (16:0/18:2)	Lipid	Phospholipid Metabolism	0.464057	0.13828	3.35591	0.000791044	0.429178	0.0144583
Inflammatory bowel disease and other gastroenteritis and colitis	555	M52450	Known	1-palmitoyl-2-linoleoyl-GPI (16:0/18:2)	Lipid	Phospholipid Metabolism	0.388384	0.111717	3.4765	0.000507997	0.357514	0.00983539
Inflammatory bowel disease and other gastroenteritis and colitis	555	M52737	Known	1-palmitoyl-2-meadoyl-GPC (16:0/20:3n9)*	Lipid	Phospholipid Metabolism	-0.45478	0.130495	-3.48503	0.000492084	0.355823	0.00979949
Inflammatory bowel disease and other gastroenteritis and colitis	555	M52616	Known	1-palmitoyl-2-stearoyl-GPC (16:0/18:0)	Lipid	Phospholipid Metabolism	-0.582764	0.180729	-3.22452	0.00126186	0.495716	0.0195448
Inflammatory bowel disease and other gastroenteritis and colitis	555	M52718	Known	1-palmityl-2-arachidonoyl-GPC (O-16:0/20:4)*	Lipid	Phospholipid Metabolism	-0.358862	0.0863399	-4.15639	3.23316e-05	0.0774852	0.0032554
Inflammatory bowel disease and other gastroenteritis and colitis	555	M52497	Known	1-pentadecanoyl-2-linoleoyl-GPC (15:0/18:2)*	Lipid	Phospholipid Metabolism	0.726266	0.199686	3.63705	0.000275784	0.276712	0.0069983
Inflammatory bowel disease and other gastroenteritis and colitis	555	M42450	Known	1-stearoyl-2-arachidonoyl-GPC (18:0/20:4)	Lipid	Phospholipid Metabolism	-0.205168	0.0542736	-3.78026	0.000156667	0.199544	0.00469538
Inflammatory bowel disease and other gastroenteritis and colitis	555	M52611	Known	1-stearoyl-2-docosahexaenoyl-GPC (18:0/22:6)	Lipid	Phospholipid Metabolism	-0.663239	0.15955	-4.15694	3.22532e-05	0.0774852	0.0032554
Inflammatory bowel disease and other gastroenteritis and colitis	555	M52700	Known	1-stearoyl-2-docosapentaenoyl-GPC (18:0/22:5n6)*	Lipid	Phospholipid Metabolism	-0.48128	0.133846	-3.59576	0.000323446	0.301617	0.00762251
Inflammatory bowel disease and other gastroenteritis and colitis	555	M52468	Known	1-stearoyl-2-linoleoyl-GPI (18:0/18:2)	Lipid	Phospholipid Metabolism	0.280408	0.0972314	2.88392	0.00392757	0.648899	0.0480266
Inflammatory bowel disease and other gastroenteritis and colitis	555	M52738	Known	1-stearoyl-2-meadoyl-GPC (18:0/20:3n9)*	Lipid	Phospholipid Metabolism	-0.474692	0.123148	-3.85465	0.000115897	0.16987	0.00433341
Inflammatory bowel disease and other gastroenteritis and colitis	555	M52703	Known	1-stearyl-GPC (O-18:0)*	Lipid	Lyso-phospho-ether	-1.39439	0.411862	-3.38557	0.000710318	0.412295	0.0133809
Inflammatory bowel disease and other gastroenteritis and colitis	555	M37482	Known	17alpha-hydroxypregnenolone sulfate	Lipid	Steroid	-0.608943	0.183012	-3.32734	0.000876798	0.442297	0.01502
Inflammatory bowel disease and other gastroenteritis and colitis	555	M33387	Known	2-arachidonoyl-GPC (20:4)*	Lipid	Lysolipid	-0.298151	0.072429	-4.11647	3.84726e-05	0.086629	0.0032554
Inflammatory bowel disease and other gastroenteritis and colitis	555	M32815	Known	2-arachidonoyl-GPE (20:4)*	Lipid	Lysolipid	-0.392219	0.110514	-3.54905	0.000386621	0.320338	0.0081659
Inflammatory bowel disease and other gastroenteritis and colitis	555	M46203	Known	2-docosahexaenoyl-GPC (22:6)*	Lipid	Lysolipid	-0.68193	0.163303	-4.17586	2.96869e-05	0.0735117	0.0032554
Inflammatory bowel disease and other gastroenteritis and colitis	555	M37253	Known	2-hydroxyglutarate	Lipid	Fatty Acid Dicarboxylate	0.812578	0.208651	3.89444	9.84257e-05	0.155165	0.00433341
Inflammatory bowel disease and other gastroenteritis and colitis	555	M01432	Known	2-hydroxyphenylacetate	Amino Acid	Phenylalanine and Tyrosine Metabolism	0.981622	0.343039	2.86154	0.00421583	0.655243	0.049804
Inflammatory bowel disease and other gastroenteritis and colitis	555	M36593	Known	2-linoleoyl-GPE (18:2)*	Lipid	Lysolipid	0.740275	0.197973	3.73927	0.000184554	0.219275	0.00494746
Inflammatory bowel disease and other gastroenteritis and colitis	555	M01110	Known	arachidonate (20:4n6)	Lipid	Polyunsaturated Fatty Acid (n3 and n6)	-0.333855	0.0815076	-4.096	4.20353e-05	0.0907508	0.0032554
Inflammatory bowel disease and other gastroenteritis and colitis	555	M44675	Known	docosahexaenoate (DHA; 22:6n3)	Lipid	Polyunsaturated Fatty Acid (n3 and n6)	-0.975737	0.229462	-4.25229	2.11595e-05	0.0571149	0.0032554
Inflammatory bowel disease and other gastroenteritis and colitis	555	M32504	Known	docosapentaenoate (n3 DPA; 22:5n3)	Lipid	Polyunsaturated Fatty Acid (n3 and n6)	-0.799755	0.209918	-3.80985	0.000139053	0.187089	0.00440545
Inflammatory bowel disease and other gastroenteritis and colitis	555	M18467	Known	eicosapentaenoate (EPA; 20:5n3)	Lipid	Polyunsaturated Fatty Acid (n3 and n6)	-0.428743	0.10836	-3.95666	7.60048e-05	0.131857	0.00393056
Inflammatory bowel disease and other gastroenteritis and colitis	555	M33364	Known	gamma-glutamylthreonine*	Peptide	Gamma-glutamyl Amino Acid	-0.710525	0.234228	-3.03347	0.00241758	0.581797	0.0324049
Inflammatory bowel disease and other gastroenteritis and colitis	555	M33009	Known	homostachydrine*	Xenobiotics	Food Component/Plant	-0.982544	0.293323	-3.3497	0.000809	0.432707	0.0144583
Inflammatory bowel disease and other gastroenteritis and colitis	555	M52719	Known	phosphatidylcholine (16:0/22:5n3 18:1/20:4)*	Lipid	Phospholipid Metabolism	-0.262661	0.0801718	-3.27623	0.00105204	0.468376	0.0166653
Inflammatory bowel disease and other gastroenteritis and colitis	555	M52720	Known	phosphatidylcholine (18:0/20:5 16:0/22:5n6)*	Lipid	Phospholipid Metabolism	-0.323062	0.0818383	-3.94757	7.89496e-05	0.134813	0.00393056
Inflammatory bowel disease and other gastroenteritis and colitis	555	M42459	Known	sphingomyelin (d18:2/16:0 d18:1/16:1)*	Lipid	Sphingolipid Metabolism	-1.31954	0.411914	-3.20344	0.00135795	0.504353	0.020576
Inflammatory bowel disease and other gastroenteritis and colitis	555	M33969	Known	stearidonate (18:4n3)	Lipid	Polyunsaturated Fatty Acid (n3 and n6)	-0.45291	0.153239	-2.95559	0.00312076	0.619173	0.040281
Inflammatory bowel disease and other gastroenteritis and colitis	555	M37097	Known	tryptophan betaine	Amino Acid	Tryptophan Metabolism	0.374872	0.118798	3.15553	0.00160205	0.531773	0.0232631
Inflammatory bowel disease and other gastroenteritis and colitis	555	M49583	Unknown	X - 23705	NA	NA	-0.405187	0.1011	-4.00777	6.12937e-05	0.115063	0.00356014
Inflammatory bowel disease and other gastroenteritis and colitis	555	M52083	Unknown	X - 24054	NA	NA	0.757422	0.208536	3.63209	0.000281137	0.280782	0.0069983
Insomnia	327.4	M33955	Known	1-palmitoyl-GPC (16:0)	Lipid	Lysolipid	0.584148	0.150007	3.89415	9.85449e-05	0.155165	0.0343429
Insomnia	327.4	M52053	Unknown	X - 24024	NA	NA	0.661231	0.158427	4.17372	2.9967e-05	0.0739946	0.020887
Insulin pump user	250.3	M38102	Known	oleoyl ethanolamide	Lipid	Endocannabinoid	-0.248379	0.0615081	-4.03815	5.38735e-05	0.104859	0.0375498
Intestinal infection	8	M42463	Known	sphingomyelin (d18:1/14:0 d16:1/16:0)*	Lipid	Sphingolipid Metabolism	0.530324	0.147365	3.5987	0.000319815	0.300006	0.0371519
Intestinal infection	8	M52433	Known	sphingomyelin (d18:1/15:0 d16:1/17:0)*	Lipid	Sphingolipid Metabolism	0.60204	0.166379	3.61848	0.000296336	0.289072	0.0371519
Intestinal infection	8	M52615	Known	sphingomyelin (d18:1/17:0 d17:1/18:0 d19:1/16:0)	Lipid	Sphingolipid Metabolism	0.922817	0.247008	3.73597	0.000186991	0.220522	0.0325832
Intestinal infection	8	M48490	Known	sphingomyelin (d18:1/20:0 d16:1/22:0)*	Lipid	Sphingolipid Metabolism	0.642012	0.156174	4.11087	3.94167e-05	0.0869945	0.0137367
Intestinal infection	8	M48493	Known	sphingomyelin (d18:1/22:1 d18:2/22:0 d16:1/24:1)*	Lipid	Sphingolipid Metabolism	1.09303	0.260419	4.1972	2.70235e-05	0.0696966	0.0137367
Intestinal infection	8	M52435	Known	sphingomyelin (d18:2/23:0 d18:1/23:1 d17:1/24:1)*	Lipid	Sphingolipid Metabolism	1.34493	0.337482	3.98519	6.74259e-05	0.122274	0.0156653
Intestinal obstruction without mention of hernia	560	M37253	Known	2-hydroxyglutarate	Lipid	Fatty Acid Dicarboxylate	0.86009	0.206358	4.16796	3.07341e-05	0.0754599	0.0214217
Ischemic Heart Disease	411	M32350	Known	1-methylimidazoleacetate	Amino Acid	Histidine Metabolism	0.177193	0.0459597	3.85541	0.000115535	0.169625	0.0115039
Ischemic Heart Disease	411	M00063	Known	cholesterol	Lipid	Sterol	0.439772	0.0699509	6.28687	3.2392e-10	2.2523e-06	1.12886e-07
Ischemic Heart Disease	411	M00513	Known	creatinine	Amino Acid	Creatine Metabolism	-0.487008	0.118457	-4.11126	3.9351e-05	0.0869945	0.00477524
Ischemic Heart Disease	411	M44877	Known	N-palmitoyl-sphingosine (d18:1/16:0)	Lipid	Sphingolipid Metabolism	0.381784	0.0930915	4.10117	4.11068e-05	0.0893208	0.00477524
Ischemic Heart Disease	411	M52434	Known	palmitoyl dihydrosphingomyelin (d18:0/16:0)*	Lipid	Sphingolipid Metabolism	0.32805	0.0643717	5.09618	3.46582e-07	0.00153691	8.05226e-05
Ischemic Heart Disease	411	M37506	Known	palmitoyl sphingomyelin (d18:1/16:0)	Lipid	Sphingolipid Metabolism	0.429027	0.0677721	6.33043	2.44484e-10	1.75616e-06	1.12886e-07
Ischemic Heart Disease	411	M52615	Known	sphingomyelin (d18:1/17:0 d17:1/18:0 d19:1/16:0)	Lipid	Sphingolipid Metabolism	0.303227	0.0822204	3.68797	0.000226049	0.246206	0.0165554
Ischemic Heart Disease	411	M48490	Known	sphingomyelin (d18:1/20:0 d16:1/22:0)*	Lipid	Sphingolipid Metabolism	0.179334	0.0534038	3.35808	0.000784852	0.427955	0.0497311
Ischemic Heart Disease	411	M19503	Known	stearoyl sphingomyelin (d18:1/18:0)	Lipid	Sphingolipid Metabolism	0.299744	0.0616505	4.86199	1.16209e-06	0.00459111	0.000202495
Ischemic Heart Disease	411	M00606	Known	uridine	Nucleotide	Pyrimidine Metabolism Uracil containing	-0.324329	0.0882444	-3.67535	0.000237523	0.253619	0.0165554
Ischemic Heart Disease	411	M46663	Unknown	X - 11334	NA	NA	0.181759	0.0485299	3.74531	0.000180174	0.215989	0.0156977
Jaundice (not of newborn)	573.5	M32586	Known	bilirubin (E E)*	Cofactors and Vitamins	Hemoglobin and Porphyrin Metabolism	0.332193	0.0798468	4.16037	3.17727e-05	0.0772065	0.00779462
Jaundice (not of newborn)	573.5	M43807	Known	bilirubin (Z Z)	Cofactors and Vitamins	Hemoglobin and Porphyrin Metabolism	0.312553	0.0815525	3.83254	0.00012683	0.179829	0.00872734
Jaundice (not of newborn)	573.5	M02137	Known	biliverdin	Cofactors and Vitamins	Hemoglobin and Porphyrin Metabolism	0.314828	0.080912	3.89099	9.98363e-05	0.15588	0.00872734
Jaundice (not of newborn)	573.5	M41888	Known	succinimide	Xenobiotics	Chemical	0.374113	0.0975158	3.83644	0.000124832	0.178426	0.00872734
Jaundice (not of newborn)	573.5	M47478	Unknown	X - 10458	NA	NA	-1.30259	0.295536	-4.40755	1.04546e-05	0.0323371	0.00728687
Jaundice (not of newborn)	573.5	M46360	Unknown	X - 11441	NA	NA	0.500578	0.13073	3.82909	0.00012862	0.180018	0.00872734
Jaundice (not of newborn)	573.5	M46443	Unknown	X - 11442	NA	NA	0.471248	0.123616	3.8122	0.000137734	0.18589	0.00872734
Jaundice (not of newborn)	573.5	M46914	Unknown	X - 11522	NA	NA	0.363533	0.089067	4.08157	4.47324e-05	0.0948282	0.00779462
Jaundice (not of newborn)	573.5	M46603	Unknown	X - 11530	NA	NA	0.345691	0.0892161	3.87476	0.000106732	0.162086	0.00872734
Jaundice (not of newborn)	573.5	M46517	Unknown	X - 16946	NA	NA	0.31488	0.0844988	3.72645	0.000194199	0.225957	0.0112797
Jaundice (not of newborn)	573.5	M46493	Unknown	X - 21448	NA	NA	0.307202	0.083766	3.66738	0.000245049	0.260057	0.0131384
Jaundice (not of newborn)	573.5	M46503	Unknown	X - 21458	NA	NA	0.358235	0.0901015	3.9759	7.01125e-05	0.125438	0.00872734
Jaundice (not of newborn)	573.5	M46972	Unknown	X - 21796	NA	NA	1.45254	0.351272	4.13508	3.54839e-05	0.0824629	0.00779462
Jaundice (not of newborn)	573.5	M49681	Unknown	X - 23782	NA	NA	1.59083	0.448217	3.54924	0.000386344	0.320338	0.0192344
Kyphosis (acquired)	737.1	M46681	Unknown	X - 16935	NA	NA	-0.812482	0.203496	-3.99261	6.53504e-05	0.119328	0.0455492
Liver abscess and sequelae of chronic liver disease	571.8	M52449	Known	1-stearoyl-2-arachidonoyl-GPI (18:0/20:4)	Lipid	Phospholipid Metabolism	-0.334843	0.0948467	-3.53036	0.00041499	0.329507	0.0298359
Liver abscess and sequelae of chronic liver disease	571.8	M38637	Known	cinnamoylglycine	Xenobiotics	Food Component/Plant	0.771044	0.201329	3.82977	0.000128262	0.180018	0.0213764
Liver abscess and sequelae of chronic liver disease	571.8	M33949	Known	gamma-glutamylglycine	Peptide	Gamma-glutamyl Amino Acid	0.489487	0.137213	3.56736	0.000360599	0.313418	0.0298359
Liver abscess and sequelae of chronic liver disease	571.8	M00058	Known	glycine	Amino Acid	Glycine Serine and Threonine Metabolism	0.314742	0.0803801	3.91567	9.01517e-05	0.14631	0.0213764
Liver abscess and sequelae of chronic liver disease	571.8	M35437	Known	isobutyrylglycine	Amino Acid	Leucine Isoleucine and Valine Metabolism	0.558516	0.143935	3.88035	0.000104308	0.160176	0.0213764
Liver abscess and sequelae of chronic liver disease	571.8	M35107	Known	isovalerylglycine	Amino Acid	Leucine Isoleucine and Valine Metabolism	0.618109	0.16328	3.78559	0.000153345	0.197559	0.0213764
Liver abscess and sequelae of chronic liver disease	571.8	M27710	Known	N-acetylglycine	Amino Acid	Glycine Serine and Threonine Metabolism	0.313531	0.0896621	3.4968	0.000470867	0.350329	0.0298359
Liver abscess and sequelae of chronic liver disease	571.8	M44877	Known	N-palmitoyl-sphingosine (d18:1/16:0)	Lipid	Sphingolipid Metabolism	-0.99691	0.212462	-4.69217	2.70321e-06	0.00991359	0.00188414
Liver abscess and sequelae of chronic liver disease	571.8	M48980	Known	tigloylglycine	Amino Acid	Leucine Isoleucine and Valine Metabolism	0.515983	0.140167	3.6812	0.000232138	0.250329	0.0269668
Liver abscess and sequelae of chronic liver disease	571.8	M47013	Unknown	X - 16570	NA	NA	0.374132	0.112247	3.33312	0.00085877	0.441118	0.0498802
Liver abscess and sequelae of chronic liver disease	571.8	M46994	Unknown	X - 17367	NA	NA	0.643302	0.178018	3.61369	0.000301865	0.291889	0.0298359
Liver abscess and sequelae of chronic liver disease	571.8	M47739	Unknown	X - 22475	NA	NA	-0.864318	0.24584	-3.51577	0.000438478	0.339063	0.0298359
Lung transplant	510.2	M52697	Known	1-oleoyl-2-docosahexaenoyl-GPC (18:1/22:6)*	Lipid	Phospholipid Metabolism	2.12416	0.61051	3.47932	0.000502696	0.356421	0.0401312
Lung transplant	510.2	M52975	Known	glycodeoxycholate sulfate	Lipid	Secondary Bile Acid Metabolism	-0.857973	0.237994	-3.60502	0.000312128	0.295611	0.0401312
Lung transplant	510.2	M38170	Known	pregnenolone sulfate	Lipid	Steroid	-1.24308	0.356987	-3.48215	0.00049741	0.356017	0.0401312
Lung transplant	510.2	M32807	Known	taurocholenate sulfate	Lipid	Secondary Bile Acid Metabolism	-1.01139	0.291367	-3.47117	0.000518193	0.36063	0.0401312
Lung transplant	510.2	M46592	Unknown	X - 11299	NA	NA	-4.29843	1.15876	-3.70951	0.000207664	0.233496	0.0401312
Lung transplant	510.2	M46655	Unknown	X - 14626	NA	NA	-1.04947	0.269317	-3.89677	9.7486e-05	0.154649	0.0401312
Lung transplant	510.2	M46689	Unknown	X - 17145	NA	NA	-4.6489	1.31696	-3.53003	0.000415505	0.329507	0.0401312
Lung transplant	510.2	M46700	Unknown	X - 18922	NA	NA	-1.2454	0.350094	-3.55733	0.000374636	0.317043	0.0401312
Lung transplant	510.2	M46384	Unknown	X - 21339	NA	NA	-2.07508	0.595982	-3.48178	0.000498085	0.356017	0.0401312
Lymphadenitis	289.4	M46652	Unknown	X - 14658	NA	NA	0.372262	0.0839911	4.43216	9.32935e-06	0.0291679	0.00650256
Malignant neoplasm of bladder	189.21	M46607	Unknown	X - 11849	NA	NA	1.45932	0.378227	3.85832	0.00011417	0.16831	0.0381949
Malignant neoplasm of bladder	189.21	M46519	Unknown	X - 21474	NA	NA	0.908322	0.233157	3.89576	9.78927e-05	0.154699	0.0381949
Malignant neoplasm of bladder	189.21	M46728	Unknown	X - 21659	NA	NA	1.00247	0.266032	3.76825	0.000164397	0.205889	0.0381949
Memory loss	292.3	M47087	Known	1-nonadecanoyl-GPC (19:0)	Lipid	Lysolipid	1.90672	0.515706	3.69729	0.000217911	0.241394	0.037971
Memory loss	292.3	M52616	Known	1-palmitoyl-2-stearoyl-GPC (16:0/18:0)	Lipid	Phospholipid Metabolism	1.18402	0.198054	5.97827	2.25525e-09	1.45198e-05	7.85954e-07
Memory loss	292.3	M00063	Known	cholesterol	Lipid	Sterol	0.922497	0.161218	5.72203	1.05256e-08	6.13987e-05	2.44544e-06
Memory loss	292.3	M44877	Known	N-palmitoyl-sphingosine (d18:1/16:0)	Lipid	Sphingolipid Metabolism	1.71996	0.198888	8.64788	5.24645e-18	8e-14	3.65678e-15
Meningitis	320	M27447	Known	1-linoleoylglycerol (18:2)	Lipid	Monoacylglycerol	4.52329	1.04932	4.31068	1.62753e-05	0.0466858	0.0113439
Microscopic hematuria	593.2	M27719	Known	galactonate	Carbohydrate	Fructose Mannose and Galactose Metabolism	-2.69361	0.56478	-4.76931	1.84854e-06	0.00698555	0.00128843
Mild cognitive impairment	292.2	M52616	Known	1-palmitoyl-2-stearoyl-GPC (16:0/18:0)	Lipid	Phospholipid Metabolism	1.3784	0.340122	4.05268	5.0635e-05	0.102349	0.0117642
Mild cognitive impairment	292.2	M00063	Known	cholesterol	Lipid	Sterol	1.2974	0.280983	4.61736	3.8865e-06	0.0136209	0.00135445
Mild cognitive impairment	292.2	M44877	Known	N-palmitoyl-sphingosine (d18:1/16:0)	Lipid	Sphingolipid Metabolism	2.06718	0.338885	6.09995	1.06105e-09	7.149e-06	7.39551e-07
Mixed hyperlipidemia	272.13	M52682	Known	1-(1-enyl-palmitoyl)-2-linoleoyl-GPC (P-16:0/18:2)*	Lipid	Plasmalogen	-0.47269	0.122197	-3.86825	0.000109617	0.163609	0.00272869
Mixed hyperlipidemia	272.13	M52478	Known	1-(1-enyl-palmitoyl)-2-oleoyl-GPC (P-16:0/18:1)*	Lipid	Plasmalogen	-0.495178	0.0976521	-5.07084	3.96072e-07	0.00171268	1.72539e-05
Mixed hyperlipidemia	272.13	M52713	Known	1-(1-enyl-palmitoyl)-2-palmitoleoyl-GPC (P-16:0/16:1)*	Lipid	Plasmalogen	-0.15612	0.0448314	-3.48237	0.000497002	0.356017	0.00989744
Mixed hyperlipidemia	272.13	M52612	Known	1-(1-enyl-stearoyl)-2-oleoyl-GPC (P-18:0/18:1)	Lipid	Plasmalogen	0.46162	0.109264	4.22482	2.39133e-05	0.062793	0.000734288
Mixed hyperlipidemia	272.13	M45675	Known	1-docosapentaenoyl-GPC (22:5n6)*	Lipid	Lysolipid	0.281259	0.0867871	3.2408	0.00119196	0.487991	0.022454
Mixed hyperlipidemia	272.13	M45951	Known	1-linolenoyl-GPC (18:3)*	Lipid	Lysolipid	0.433839	0.132473	3.27493	0.00105689	0.468807	0.0204626
Mixed hyperlipidemia	272.13	M45453	Known	1-myristoyl-GPC (14:0)	Lipid	Lysolipid	0.573933	0.139524	4.11351	3.89682e-05	0.0869945	0.00108643
Mixed hyperlipidemia	272.13	M46798	Known	1-oleoyl-2-linoleoyl-glycerol (18:1/18:2)	Lipid	Diacylglycerol	0.534645	0.0739835	7.22655	4.95424e-13	5.06591e-09	4.93301e-11
Mixed hyperlipidemia	272.13	M46799	Known	1-oleoyl-3-linoleoyl-glycerol (18:1/18:2)	Lipid	Diacylglycerol	0.531618	0.0802671	6.62312	3.51705e-11	2.83044e-07	2.72376e-09
Mixed hyperlipidemia	272.13	M35628	Known	1-oleoyl-GPE (18:1)	Lipid	Lysolipid	0.552689	0.177147	3.11995	0.00180883	0.549204	0.0315188
Mixed hyperlipidemia	272.13	M52633	Known	1-palmitoyl-2-linoleoyl-glycerol (16:0/18:2)*	Lipid	Diacylglycerol	0.308347	0.0873387	3.53048	0.000414811	0.329507	0.0090351
Mixed hyperlipidemia	272.13	M52470	Known	1-palmitoyl-2-palmitoleoyl-GPC (16:0/16:1)*	Lipid	Phospholipid Metabolism	0.450104	0.106613	4.22185	2.42305e-05	0.0633286	0.000734288
Mixed hyperlipidemia	272.13	M52616	Known	1-palmitoyl-2-stearoyl-GPC (16:0/18:0)	Lipid	Phospholipid Metabolism	0.534925	0.0904468	5.91425	3.33397e-09	2.08471e-05	1.78752e-07
Mixed hyperlipidemia	272.13	M52634	Known	1-palmitoyl-3-linoleoyl-glycerol (16:0/18:2)*	Lipid	Diacylglycerol	0.681938	0.0965067	7.06623	1.59201e-12	1.50403e-08	1.38704e-10
Mixed hyperlipidemia	272.13	M33955	Known	1-palmitoyl-GPC (16:0)	Lipid	Lysolipid	0.496522	0.107166	4.63321	3.60032e-06	0.0128776	0.000125471
Mixed hyperlipidemia	272.13	M52447	Known	1-stearoyl-2-arachidonoyl-GPE (18:0/20:4)	Lipid	Phospholipid Metabolism	0.108066	0.0341103	3.16813	0.00153422	0.523303	0.0274193
Mixed hyperlipidemia	272.13	M52449	Known	1-stearoyl-2-arachidonoyl-GPI (18:0/20:4)	Lipid	Phospholipid Metabolism	0.139519	0.0435564	3.20317	0.00135924	0.504353	0.0249312
Mixed hyperlipidemia	272.13	M52466	Known	1-stearoyl-2-docosahexaenoyl-GPE (18:0/22:6)*	Lipid	Phospholipid Metabolism	0.140475	0.0391519	3.58794	0.000333297	0.304935	0.0077436
Mixed hyperlipidemia	272.13	M52438	Known	1-stearoyl-2-oleoyl-GPC (18:0/18:1)	Lipid	Phospholipid Metabolism	0.419127	0.141568	2.96061	0.00307028	0.618609	0.0497672
Mixed hyperlipidemia	272.13	M42448	Known	1-stearoyl-2-oleoyl-GPE (18:0/18:1)	Lipid	Phospholipid Metabolism	0.255024	0.0713888	3.57232	0.000353832	0.311275	0.00795551
Mixed hyperlipidemia	272.13	M35253	Known	2-palmitoyl-GPC (16:0)*	Lipid	Lysolipid	0.549552	0.157292	3.49382	0.000476157	0.350867	0.00976121
Mixed hyperlipidemia	272.13	M48492	Known	behenoyl sphingomyelin (d18:1/22:0)*	Lipid	Sphingolipid Metabolism	0.944661	0.145513	6.49195	8.47309e-11	6.40388e-07	5.36886e-09
Mixed hyperlipidemia	272.13	M00063	Known	cholesterol	Lipid	Sterol	0.928292	0.071349	13.0106	1.06519e-38	6.17215e-34	7.4244e-36
Mixed hyperlipidemia	272.13	M33364	Known	gamma-glutamylthreonine*	Peptide	Gamma-glutamyl Amino Acid	-0.498935	0.119479	-4.17594	2.96759e-05	0.0735117	0.000861838
Mixed hyperlipidemia	272.13	M53010	Known	lactosyl-N-palmitoyl-sphingosine	Lipid	Sphingolipid Metabolism	0.345107	0.0613387	5.62624	1.84178e-08	0.000103948	8.55814e-07
Mixed hyperlipidemia	272.13	M44877	Known	N-palmitoyl-sphingosine (d18:1/16:0)	Lipid	Sphingolipid Metabolism	0.935504	0.0935469	10.0004	1.51825e-23	3.66555e-19	3.5274e-21
Mixed hyperlipidemia	272.13	M33447	Known	palmitoleate (16:1n7)	Lipid	Long Chain Fatty Acid	-0.687021	0.169254	-4.05911	4.92611e-05	0.101575	0.00132058
Mixed hyperlipidemia	272.13	M52434	Known	palmitoyl dihydrosphingomyelin (d18:0/16:0)*	Lipid	Sphingolipid Metabolism	0.615303	0.0654355	9.40319	5.29309e-21	1.04558e-16	9.22321e-19
Mixed hyperlipidemia	272.13	M37506	Known	palmitoyl sphingomyelin (d18:1/16:0)	Lipid	Sphingolipid Metabolism	0.837676	0.0691695	12.1105	9.29455e-34	3.67202e-29	3.23915e-31
Mixed hyperlipidemia	272.13	M01508	Known	pantothenate	Cofactors and Vitamins	Pantothenate and CoA Metabolism	0.423007	0.142162	2.97552	0.00292495	0.61157	0.0485403
Mixed hyperlipidemia	272.13	M01806	Known	retinol (Vitamin A)	Cofactors and Vitamins	Vitamin A Metabolism	0.390771	0.111437	3.50664	0.000453804	0.343578	0.00958488
Mixed hyperlipidemia	272.13	M52433	Known	sphingomyelin (d18:1/15:0 d16:1/17:0)*	Lipid	Sphingolipid Metabolism	0.232709	0.059097	3.93775	8.22484e-05	0.138273	0.00212323
Mixed hyperlipidemia	272.13	M52615	Known	sphingomyelin (d18:1/17:0 d17:1/18:0 d19:1/16:0)	Lipid	Sphingolipid Metabolism	0.744639	0.0826766	9.00664	2.1246e-19	3.55119e-15	2.96169e-17
Mixed hyperlipidemia	272.13	M48490	Known	sphingomyelin (d18:1/20:0 d16:1/22:0)*	Lipid	Sphingolipid Metabolism	0.350138	0.0538596	6.50094	7.9822e-11	6.08579e-07	5.36886e-09
Mixed hyperlipidemia	272.13	M48491	Known	sphingomyelin (d18:1/20:1 d18:2/20:0)*	Lipid	Sphingolipid Metabolism	0.140734	0.04615	3.0495	0.00229223	0.573008	0.0389679
Mixed hyperlipidemia	272.13	M48493	Known	sphingomyelin (d18:1/22:1 d18:2/22:0 d16:1/24:1)*	Lipid	Sphingolipid Metabolism	0.450982	0.091016	4.95498	7.23385e-07	0.00293802	2.80111e-05
Mixed hyperlipidemia	272.13	M52435	Known	sphingomyelin (d18:2/23:0 d18:1/23:1 d17:1/24:1)*	Lipid	Sphingolipid Metabolism	0.684497	0.114637	5.97097	2.35846e-09	1.50726e-05	1.36987e-07
Mixed hyperlipidemia	272.13	M19503	Known	stearoyl sphingomyelin (d18:1/18:0)	Lipid	Sphingolipid Metabolism	0.558944	0.0623157	8.96956	2.97694e-19	4.88196e-15	3.45822e-17
Mixed hyperlipidemia	272.13	M01284	Known	threonine	Amino Acid	Glycine Serine and Threonine Metabolism	-0.64803	0.133368	-4.85895	1.18011e-06	0.0046412	4.32914e-05
Mixed hyperlipidemia	272.13	M01649	Known	valine	Amino Acid	Leucine Isoleucine and Valine Metabolism	-0.86295	0.231128	-3.73365	0.000188724	0.221348	0.00453589
Mixed hyperlipidemia	272.13	M46621	Unknown	X - 12524	NA	NA	0.898141	0.177971	5.04656	4.49827e-07	0.00189792	1.84429e-05
Mixed hyperlipidemia	272.13	M52053	Unknown	X - 24024	NA	NA	0.655371	0.113789	5.75951	8.43586e-09	5.02199e-05	4.19986e-07
Mixed hyperlipidemia	272.13	M52126	Unknown	X - 24097	NA	NA	0.888355	0.193819	4.58342	4.57425e-06	0.0157768	0.000151822
Mycoses	117	M46646	Unknown	X - 13835	NA	NA	-2.44529	0.555124	-4.40494	1.05814e-05	0.0326132	0.00737524
Myeloid leukemia, acute	204.21	M43333	Known	carboxyibuprofen	Xenobiotics	Drug	0.403857	0.0843642	4.78707	1.69237e-06	0.00645147	0.00117958
Myocardial infarction	411.2	M37506	Known	palmitoyl sphingomyelin (d18:1/16:0)	Lipid	Sphingolipid Metabolism	0.389519	0.0962422	4.04728	5.18161e-05	0.103743	0.0361158
Nasal polyps	471	M19130	Known	1 2-dipalmitoyl-GPC (16:0/16:0)	Lipid	Phospholipid Metabolism	1.95262	0.534122	3.65576	0.000256419	0.268194	0.0255121
Nasal polyps	471	M19132	Known	1 2-distearoyl-GPC (18:0/18:0)	Lipid	Phospholipid Metabolism	2.98755	0.860793	3.47069	0.000519125	0.36063	0.0255121
Nasal polyps	471	M52475	Known	1-(1-enyl-stearoyl)-2-arachidonoyl-GPE (P-18:0/20:4)*	Lipid	Plasmalogen	1.82483	0.471972	3.8664	0.000110455	0.164389	0.0255121
Nasal polyps	471	M52698	Known	1-adrenoyl-GPC (22:4)*	Lipid	Lysolipid	1.63943	0.495738	3.30705	0.000942845	0.450147	0.0282529
Nasal polyps	471	M46325	Known	1-arachidonoyl-GPA (20:4)	Lipid	Lysolipid	0.912168	0.292427	3.1193	0.00181281	0.549204	0.0382888
Nasal polyps	471	M33228	Known	1-arachidonoyl-GPC (20:4n6)*	Lipid	Lysolipid	0.564981	0.186922	3.02256	0.00250648	0.588516	0.0440475
Nasal polyps	471	M34397	Known	1-arachidonylglycerol (20:4)	Lipid	Monoacylglycerol	1.78712	0.561318	3.18379	0.00145361	0.514235	0.0326828
Nasal polyps	471	M33821	Known	1-dihomo-linolenoyl-GPC (20:3n3 or 6)*	Lipid	Lysolipid	-1.02771	0.336891	-3.05058	0.00228398	0.572718	0.0430252
Nasal polyps	471	M44630	Known	1-dihomo-linolenoyl-GPE (20:3n3 or 6)*	Lipid	Lysolipid	-1.19712	0.352991	-3.39137	0.000695452	0.410409	0.0255121
Nasal polyps	471	M47888	Known	1-eicosapentaenoyl-GPE (20:5)*	Lipid	Lysolipid	1.77762	0.523803	3.39369	0.000689579	0.409405	0.0255121
Nasal polyps	471	M49617	Known	1-lignoceroyl-GPC (24:0)	Lipid	Lysolipid	4.08681	1.17749	3.47077	0.000518967	0.36063	0.0255121
Nasal polyps	471	M52710	Known	1-linoleoyl-2-arachidonoyl-GPC (18:2/20:4n6)*	Lipid	Phospholipid Metabolism	1.38551	0.424346	3.26505	0.00109444	0.47138	0.0282529
Nasal polyps	471	M36600	Known	1-linoleoyl-GPE (18:2)*	Lipid	Lysolipid	-1.90944	0.575736	-3.31651	0.00091148	0.445033	0.0282529
Nasal polyps	471	M52705	Known	1-oleoyl-2-dihomo-linolenoyl-GPC (18:1/20:3)*	Lipid	Phospholipid Metabolism	-1.03817	0.334626	-3.10248	0.00191906	0.55484	0.0393407
Nasal polyps	471	M52462	Known	1-palmitoyl-2-arachidonoyl-GPC (16:0/20:4)	Lipid	Phospholipid Metabolism	0.755275	0.208282	3.62622	0.000287606	0.283757	0.0255121
Nasal polyps	471	M52454	Known	1-palmitoyl-2-dihomo-linolenoyl-GPC (16:0/20:3n3 or 6)*	Lipid	Phospholipid Metabolism	-1.09272	0.364395	-2.99872	0.00271121	0.602745	0.0449931
Nasal polyps	471	M52610	Known	1-palmitoyl-2-docosahexaenoyl-GPC (16:0/22:6)	Lipid	Phospholipid Metabolism	2.15825	0.580024	3.72097	0.000198462	0.227566	0.0255121
Nasal polyps	471	M52463	Known	1-palmitoyl-2-eicosapentaenoyl-GPC (16:0/20:5)*	Lipid	Phospholipid Metabolism	1.01804	0.31762	3.2052	0.00134968	0.503585	0.0313577
Nasal polyps	471	M52737	Known	1-palmitoyl-2-meadoyl-GPC (16:0/20:3n9)*	Lipid	Phospholipid Metabolism	1.49763	0.412358	3.63187	0.000281377	0.280782	0.0255121
Nasal polyps	471	M52718	Known	1-palmityl-2-arachidonoyl-GPC (O-16:0/20:4)*	Lipid	Phospholipid Metabolism	0.902442	0.274859	3.28329	0.00102602	0.463403	0.0282529
Nasal polyps	471	M52497	Known	1-pentadecanoyl-2-linoleoyl-GPC (15:0/18:2)*	Lipid	Phospholipid Metabolism	-1.88908	0.61521	-3.07063	0.00213609	0.564729	0.0413571
Nasal polyps	471	M42450	Known	1-stearoyl-2-arachidonoyl-GPC (18:0/20:4)	Lipid	Phospholipid Metabolism	0.581285	0.170343	3.41243	0.000643859	0.394374	0.0255121
Nasal polyps	471	M52611	Known	1-stearoyl-2-docosahexaenoyl-GPC (18:0/22:6)	Lipid	Phospholipid Metabolism	1.8785	0.496337	3.78472	0.000153882	0.197559	0.0255121
Nasal polyps	471	M52738	Known	1-stearoyl-2-meadoyl-GPC (18:0/20:3n9)*	Lipid	Phospholipid Metabolism	1.30449	0.383993	3.39718	0.000680842	0.407095	0.0255121
Nasal polyps	471	M52703	Known	1-stearyl-GPC (O-18:0)*	Lipid	Lyso-phospho-ether	4.5078	1.30924	3.44306	0.00057517	0.377496	0.0255121
Nasal polyps	471	M33387	Known	2-arachidonoyl-GPC (20:4)*	Lipid	Lysolipid	0.770655	0.2286	3.3712	0.000748427	0.420493	0.0260827
Nasal polyps	471	M46203	Known	2-docosahexaenoyl-GPC (22:6)*	Lipid	Lysolipid	1.76839	0.53698	3.29321	0.000990512	0.460793	0.0282529
Nasal polyps	471	M36593	Known	2-linoleoyl-GPE (18:2)*	Lipid	Lysolipid	-2.24745	0.627218	-3.5832	0.000339416	0.307077	0.0255121
Nasal polyps	471	M01110	Known	arachidonate (20:4n6)	Lipid	Polyunsaturated Fatty Acid (n3 and n6)	0.881266	0.259294	3.39871	0.000677039	0.405545	0.0255121
Nasal polyps	471	M44675	Known	docosahexaenoate (DHA; 22:6n3)	Lipid	Polyunsaturated Fatty Acid (n3 and n6)	2.46084	0.712396	3.45431	0.000551702	0.368859	0.0255121
Nasal polyps	471	M32504	Known	docosapentaenoate (n3 DPA; 22:5n3)	Lipid	Polyunsaturated Fatty Acid (n3 and n6)	2.11993	0.651921	3.25181	0.00114671	0.47991	0.0285449
Nasal polyps	471	M18467	Known	eicosapentaenoate (EPA; 20:5n3)	Lipid	Polyunsaturated Fatty Acid (n3 and n6)	1.2307	0.340168	3.61791	0.000296996	0.289391	0.0255121
Nasal polyps	471	M32377	Known	N-acetylneuraminate	Carbohydrate	Aminosugar Metabolism	1.11379	0.345293	3.22563	0.00125695	0.495448	0.03021
Nasal polyps	471	M52719	Known	phosphatidylcholine (16:0/22:5n3 18:1/20:4)*	Lipid	Phospholipid Metabolism	0.7309	0.242622	3.0125	0.00259103	0.595457	0.0440475
Nasal polyps	471	M52720	Known	phosphatidylcholine (18:0/20:5 16:0/22:5n6)*	Lipid	Phospholipid Metabolism	0.884175	0.254151	3.47894	0.000503411	0.356421	0.0255121
Nasal polyps	471	M42459	Known	sphingomyelin (d18:2/16:0 d18:1/16:1)*	Lipid	Sphingolipid Metabolism	4.39081	1.30887	3.35466	0.000794637	0.429528	0.0263744
Nasal polyps	471	M33969	Known	stearidonate (18:4n3)	Lipid	Polyunsaturated Fatty Acid (n3 and n6)	1.4263	0.464129	3.07306	0.00211875	0.564729	0.0413571
Nasal polyps	471	M47417	Unknown	X - 22162	NA	NA	-0.512853	0.16948	-3.02604	0.0024778	0.585939	0.0440475
Nasal polyps	471	M49583	Unknown	X - 23705	NA	NA	0.959854	0.318607	3.01266	0.00258971	0.595457	0.0440475
Nasal polyps	471	M52083	Unknown	X - 24054	NA	NA	-2.1227	0.648458	-3.27345	0.00106241	0.469839	0.0282529
Nasal polyps	471	M52670	Unknown	X - 24438	NA	NA	-0.918155	0.268117	-3.42445	0.000616049	0.387442	0.0255121
Nasal polyps	471	M52671	Unknown	X - 24439	NA	NA	-1.13452	0.360486	-3.14721	0.00164838	0.535856	0.0359037
Nausea and vomiting	789	M52616	Known	1-palmitoyl-2-stearoyl-GPC (16:0/18:0)	Lipid	Phospholipid Metabolism	-0.37274	0.0889422	-4.19081	2.77962e-05	0.0712664	0.0193739
Neurological disorders	292	M00063	Known	cholesterol	Lipid	Sterol	0.366276	0.0880898	4.15799	3.21064e-05	0.0774852	0.0111891
Neurological disorders	292	M44877	Known	N-palmitoyl-sphingosine (d18:1/16:0)	Lipid	Sphingolipid Metabolism	0.630509	0.115289	5.46894	4.52736e-08	0.000227456	3.15557e-05
Non-healing surgical wound	875	M43802	Known	guanidinoacetate	Amino Acid	Creatine Metabolism	-5.08809	0.917264	-5.54703	2.9057e-08	0.000153995	2.02528e-05
Noninfectious gastroenteritis	558	M37482	Known	17alpha-hydroxypregnenolone sulfate	Lipid	Steroid	-0.866368	0.189532	-4.57109	4.85193e-06	0.0166684	0.0033818
Nonrheumatic aortic valve disorders	395.2	M52464	Known	1-palmitoyl-2-arachidonoyl-GPE (16:0/20:4)*	Lipid	Phospholipid Metabolism	0.220113	0.0518468	4.24545	2.18158e-05	0.0585228	0.0076028
Nonrheumatic aortic valve disorders	395.2	M52465	Known	1-palmitoyl-2-docosahexaenoyl-GPE (16:0/22:6)*	Lipid	Phospholipid Metabolism	0.183937	0.0521806	3.52501	0.000423459	0.332905	0.0392243
Nonrheumatic aortic valve disorders	395.2	M19263	Known	1-palmitoyl-2-oleoyl-GPE (16:0/18:1)	Lipid	Phospholipid Metabolism	0.306786	0.0820478	3.73911	0.000184672	0.219275	0.0257433
Nonrheumatic aortic valve disorders	395.2	M35631	Known	1-palmitoyl-GPE (16:0)	Lipid	Lysolipid	0.252056	0.0730826	3.44893	0.000562821	0.37342	0.0435874
Nonrheumatic aortic valve disorders	395.2	M52447	Known	1-stearoyl-2-arachidonoyl-GPE (18:0/20:4)	Lipid	Phospholipid Metabolism	0.242286	0.0566347	4.27804	1.88549e-05	0.0519411	0.0076028
Nonrheumatic aortic valve disorders	395.2	M52466	Known	1-stearoyl-2-docosahexaenoyl-GPE (18:0/22:6)*	Lipid	Phospholipid Metabolism	0.227704	0.0648958	3.50876	0.000450207	0.343247	0.0392243
Nonrheumatic aortic valve disorders	395.2	M42398	Known	1-stearoyl-GPE (18:0)	Lipid	Lysolipid	0.294832	0.0862679	3.41763	0.000631687	0.392297	0.0440286
Nonrheumatic aortic valve disorders	395.2	M45452	Known	2-palmitoyl-GPE (16:0)*	Lipid	Lysolipid	0.37337	0.0949089	3.93399	8.35489e-05	0.139649	0.0145584
Nonrheumatic aortic valve disorders	395.2	M41220	Known	2-stearoyl-GPE (18:0)*	Lipid	Lysolipid	0.425273	0.116601	3.64725	0.000265058	0.271389	0.0307909
Nonrheumatic aortic valve disorders	395.2	M00513	Known	creatinine	Amino Acid	Creatine Metabolism	-0.669531	0.197682	-3.38691	0.00070684	0.412295	0.0447879
Nonrheumatic aortic valve disorders	395.2	M35157	Known	N6-carbamoylthreonyladenosine	Nucleotide	Purine Metabolism Adenine containing	-1.21104	0.302345	-4.00548	6.18918e-05	0.115272	0.0143795
Occlusion and stenosis of precerebral arteries	433.1	M37506	Known	palmitoyl sphingomyelin (d18:1/16:0)	Lipid	Sphingolipid Metabolism	0.52621	0.128008	4.11076	3.94366e-05	0.0869945	0.0274873
Open wound of finger(s)	871.2	M46590	Unknown	X - 07765	NA	NA	2.85709	0.64005	4.46386	8.04978e-06	0.0257226	0.00561069
Osteoarthrosis	740	M27719	Known	galactonate	Carbohydrate	Fructose Mannose and Galactose Metabolism	-0.758554	0.177018	-4.28518	1.82593e-05	0.0508661	0.0127267
Osteoporosis	743.1	M27719	Known	galactonate	Carbohydrate	Fructose Mannose and Galactose Metabolism	-1.10097	0.256281	-4.29594	1.73956e-05	0.0487729	0.0121248
Osteoporosis NOS	743.11	M27719	Known	galactonate	Carbohydrate	Fructose Mannose and Galactose Metabolism	-1.39557	0.254757	-5.47806	4.30018e-08	0.000217299	2.99723e-05
Osteoporosis, osteopenia and pathological fracture	743	M27719	Known	galactonate	Carbohydrate	Fructose Mannose and Galactose Metabolism	-0.978572	0.199681	-4.90067	9.55102e-07	0.00379057	0.000665706
Other cardiomyopathy	425.8	M48076	Unknown	X - 22771	NA	NA	-4.56502	1.09139	-4.18277	2.87979e-05	0.0734016	0.0200721
Other chronic ischemic heart disease, unspecified	411.8	M52478	Known	1-(1-enyl-palmitoyl)-2-oleoyl-GPC (P-16:0/18:1)*	Lipid	Plasmalogen	-0.505409	0.149607	-3.37826	0.000729468	0.416114	0.0299082
Other chronic ischemic heart disease, unspecified	411.8	M52713	Known	1-(1-enyl-palmitoyl)-2-palmitoleoyl-GPC (P-16:0/16:1)*	Lipid	Plasmalogen	-0.257123	0.0688442	-3.73486	0.000187823	0.220904	0.0206175
Other chronic ischemic heart disease, unspecified	411.8	M52612	Known	1-(1-enyl-stearoyl)-2-oleoyl-GPC (P-18:0/18:1)	Lipid	Plasmalogen	0.567894	0.167265	3.39517	0.000685865	0.409405	0.029878
Other chronic ischemic heart disease, unspecified	411.8	M32350	Known	1-methylimidazoleacetate	Amino Acid	Histidine Metabolism	0.252482	0.0713423	3.53902	0.000401614	0.326894	0.0233271
Other chronic ischemic heart disease, unspecified	411.8	M35628	Known	1-oleoyl-GPE (18:1)	Lipid	Lysolipid	0.892912	0.268223	3.32899	0.000871606	0.441118	0.0337505
Other chronic ischemic heart disease, unspecified	411.8	M36602	Known	1-oleoyl-GPI (18:1)*	Lipid	Lysolipid	0.630185	0.192778	3.26896	0.00107943	0.470316	0.0376181
Other chronic ischemic heart disease, unspecified	411.8	M52669	Known	1-palmitoyl-2-oleoyl-GPI (16:0/18:1)*	Lipid	Phospholipid Metabolism	0.330528	0.0924967	3.57341	0.000352365	0.310925	0.0231943
Other chronic ischemic heart disease, unspecified	411.8	M48492	Known	behenoyl sphingomyelin (d18:1/22:0)*	Lipid	Sphingolipid Metabolism	0.800466	0.229588	3.48652	0.000489342	0.355087	0.0243622
Other chronic ischemic heart disease, unspecified	411.8	M00063	Known	cholesterol	Lipid	Sterol	0.741533	0.109887	6.74811	1.49784e-11	1.26394e-07	5.21996e-09
Other chronic ischemic heart disease, unspecified	411.8	M00513	Known	creatinine	Amino Acid	Creatine Metabolism	-0.605041	0.183934	-3.28946	0.00100381	0.461869	0.036824
Other chronic ischemic heart disease, unspecified	411.8	M32599	Known	glycocholenate sulfate*	Lipid	Secondary Bile Acid Metabolism	-0.149829	0.0464865	-3.22306	0.0012683	0.496558	0.0420956
Other chronic ischemic heart disease, unspecified	411.8	M40730	Known	imidazole propionate	Amino Acid	Histidine Metabolism	0.756244	0.215498	3.50929	0.000449304	0.343247	0.0240896
Other chronic ischemic heart disease, unspecified	411.8	M33447	Known	palmitoleate (16:1n7)	Lipid	Long Chain Fatty Acid	-0.944758	0.258529	-3.65436	0.000257827	0.269342	0.0224632
Other chronic ischemic heart disease, unspecified	411.8	M52434	Known	palmitoyl dihydrosphingomyelin (d18:0/16:0)*	Lipid	Sphingolipid Metabolism	0.582026	0.101436	5.73786	9.58806e-09	5.63078e-05	2.22763e-06
Other chronic ischemic heart disease, unspecified	411.8	M37506	Known	palmitoyl sphingomyelin (d18:1/16:0)	Lipid	Sphingolipid Metabolism	0.835498	0.107888	7.74415	9.62218e-15	1.16156e-10	6.70666e-12
Other chronic ischemic heart disease, unspecified	411.8	M52615	Known	sphingomyelin (d18:1/17:0 d17:1/18:0 d19:1/16:0)	Lipid	Sphingolipid Metabolism	0.483658	0.128066	3.77663	0.000158963	0.201405	0.0206175
Other chronic ischemic heart disease, unspecified	411.8	M48490	Known	sphingomyelin (d18:1/20:0 d16:1/22:0)*	Lipid	Sphingolipid Metabolism	0.306872	0.0827094	3.71024	0.000207063	0.233122	0.0206175
Other chronic ischemic heart disease, unspecified	411.8	M48491	Known	sphingomyelin (d18:1/20:1 d18:2/20:0)*	Lipid	Sphingolipid Metabolism	0.24305	0.0713377	3.40704	0.000656712	0.398985	0.029878
Other chronic ischemic heart disease, unspecified	411.8	M19503	Known	stearoyl sphingomyelin (d18:1/18:0)	Lipid	Sphingolipid Metabolism	0.502703	0.0960653	5.23293	1.66843e-07	0.000779638	2.90723e-05
Other chronic ischemic heart disease, unspecified	411.8	M47901	Unknown	X - 11485	NA	NA	0.895545	0.249556	3.58855	0.000332522	0.304748	0.0231943
Other chronic ischemic heart disease, unspecified	411.8	M46403	Unknown	X - 21358	NA	NA	0.753114	0.211346	3.56342	0.00036605	0.316573	0.0231943
Other chronic ischemic heart disease, unspecified	411.8	M46512	Unknown	X - 21467	NA	NA	-0.176777	0.0552819	-3.19773	0.00138512	0.506434	0.0438832
Other chronic nonalcoholic liver disease	571.5	M44877	Known	N-palmitoyl-sphingosine (d18:1/16:0)	Lipid	Sphingolipid Metabolism	-0.709561	0.143193	-4.95527	7.22293e-07	0.00293802	0.000503438
Other disorders of eyelids	374	M48782	Known	C-glycosyltryptophan	Amino Acid	Tryptophan Metabolism	1.16959	0.300635	3.89041	0.000100075	0.15588	0.0139504
Other disorders of eyelids	374	M00594	Known	nicotinamide	Cofactors and Vitamins	Nicotinate and Nicotinamide Metabolism	0.556016	0.145599	3.81882	0.000134093	0.183252	0.0155772
Other disorders of eyelids	374	M41374	Known	phenylalanylalanine	Peptide	Dipeptide	-1.05787	0.264124	-4.00519	6.19685e-05	0.115272	0.0139504
Other disorders of eyelids	374	M01600	Known	phosphoethanolamine	Lipid	Phospholipid Metabolism	0.481063	0.123648	3.89058	0.000100007	0.15588	0.0139504
Other disorders of eyelids	374	M00485	Known	spermidine	Amino Acid	Polyamine Metabolism	0.431305	0.106391	4.05398	5.03546e-05	0.102349	0.0139504
Other disorders of eyelids	374	M02125	Known	taurine	Amino Acid	Methionine Cysteine SAM and Taurine Metabolism	0.475679	0.119372	3.98484	6.75269e-05	0.122274	0.0139504
Other disorders of synovium, tendon, and bursa	727	M27719	Known	galactonate	Carbohydrate	Fructose Mannose and Galactose Metabolism	-1.25025	0.267174	-4.67954	2.87517e-06	0.0104124	0.00200399
Other disorders of synovium, tendon, and bursa	727	M01437	Known	succinate	Energy	TCA Cycle	-0.686978	0.179815	-3.82048	0.000133192	0.182392	0.0464174
Other hypertensive complications	401.3	M22176	Known	cysteine s-sulfate	Amino Acid	Methionine Cysteine SAM and Taurine Metabolism	-1.33772	0.331384	-4.03676	5.41942e-05	0.105141	0.0377733
Other mental disorder	306	M27719	Known	galactonate	Carbohydrate	Fructose Mannose and Galactose Metabolism	-0.885539	0.173862	-5.09333	3.51824e-07	0.00155224	0.000245222
Other nondiabetic retinopathy	362.3	M48043	Unknown	X - 18603	NA	NA	1.40154	0.345309	4.05881	4.93238e-05	0.101575	0.0343787
Other nonspecific findings on examination of urine	598.9	M22036	Known	2-hydroxyoctanoate	Lipid	Fatty Acid Monohydroxy	-1.6768	0.444388	-3.77327	0.000161121	0.203541	0.0168358
Other nonspecific findings on examination of urine	598.9	M43255	Known	N-acetyl-1-methylhistidine*	Amino Acid	Histidine Metabolism	0.307782	0.0842622	3.65267	0.000259527	0.269909	0.0222106
Other nonspecific findings on examination of urine	598.9	M43256	Known	N-acetyl-3-methylhistidine*	Amino Acid	Histidine Metabolism	0.708549	0.186488	3.79943	0.00014503	0.191571	0.0168358
Other nonspecific findings on examination of urine	598.9	M33953	Known	N-acetylarginine	Amino Acid	Urea cycle; Arginine and Proline Metabolism	0.285734	0.0758747	3.76587	0.000165969	0.206895	0.0168358
Other nonspecific findings on examination of urine	598.9	M48434	Known	N-acetylcitrulline	Amino Acid	Urea cycle; Arginine and Proline Metabolism	0.280516	0.0745811	3.76123	0.000169083	0.208221	0.0168358
Other nonspecific findings on examination of urine	598.9	M01587	Known	N-acetylleucine	Amino Acid	Leucine Isoleucine and Valine Metabolism	0.52317	0.137102	3.81591	0.000135684	0.184556	0.0168358
Other nonspecific findings on examination of urine	598.9	M43249	Known	N-delta-acetylornithine	Amino Acid	Urea cycle; Arginine and Proline Metabolism	-0.360212	0.0902385	-3.99178	6.55791e-05	0.119494	0.0168358
Other nonspecific findings on examination of urine	598.9	M43591	Known	N2 N5-diacetylornithine	Amino Acid	Urea cycle; Arginine and Proline Metabolism	0.692811	0.191018	3.62695	0.000286794	0.283757	0.0222106
Other nonspecific findings on examination of urine	598.9	M48394	Known	pregnanolone/allopregnanolone sulfate	Lipid	Steroid	1.17299	0.339261	3.45748	0.000545253	0.367712	0.0380041
Other nonspecific findings on examination of urine	598.9	M46456	Unknown	X - 21411	NA	NA	-1.21857	0.310471	-3.92489	8.67686e-05	0.143104	0.0168358
Other symptoms/disorders or the urinary system	599	M27719	Known	galactonate	Carbohydrate	Fructose Mannose and Galactose Metabolism	-0.816041	0.184496	-4.42308	9.73047e-06	0.0302047	0.00678214
Other tests	1010	M27719	Known	galactonate	Carbohydrate	Fructose Mannose and Galactose Metabolism	-0.564162	0.127324	-4.43091	9.38372e-06	0.0292328	0.00654045
Other venous embolism and thrombosis	452	M22154	Known	bradykinin	Peptide	Polypeptide	0.146598	0.0385707	3.80076	0.000144251	0.190989	0.0157134
Other venous embolism and thrombosis	452	M34420	Known	bradykinin des-arg(9)	Peptide	Polypeptide	0.269896	0.0556585	4.84914	1.24001e-06	0.00483302	0.000216071
Other venous embolism and thrombosis	452	M33962	Known	bradykinin hydroxy-pro(3)	Peptide	Polypeptide	0.352569	0.0726739	4.85138	1.22606e-06	0.00480017	0.000216071
Other venous embolism and thrombosis	452	M40459	Known	escitalopram	Xenobiotics	Drug	-0.171079	0.0488695	-3.50072	0.000463996	0.348153	0.033233
Other venous embolism and thrombosis	452	M40685	Known	methionylalanine	Peptide	Dipeptide	0.14186	0.0406073	3.49346	0.000476801	0.350867	0.033233
Other venous embolism and thrombosis	452	M41487	Known	phenylalanylarginine	Peptide	Dipeptide	0.166258	0.0444804	3.73778	0.000185655	0.219543	0.0161752
Other venous embolism and thrombosis	452	M17769	Known	sphinganine	Lipid	Sphingolipid Metabolism	2.4712	0.280804	8.80045	1.36266e-18	2.1534e-14	9.49775e-16
Other venous embolism and thrombosis	452	M17747	Known	sphingosine	Lipid	Sphingolipid Metabolism	1.14004	0.155583	7.32756	2.34381e-13	2.45439e-09	8.16818e-11
Other venous embolism and thrombosis	452	M47211	Unknown	X - 14095	NA	NA	0.2156	0.0570605	3.77844	0.000157811	0.200237	0.0157134
Other venous embolism and thrombosis	452	M46371	Unknown	X - 21327	NA	NA	-0.843189	0.220184	-3.82947	0.000128419	0.180018	0.0157134
Pain	338	M22036	Known	2-hydroxyoctanoate	Lipid	Fatty Acid Monohydroxy	-0.437122	0.125571	-3.48109	0.00049938	0.356017	0.0316425
Pain	338	M43255	Known	N-acetyl-1-methylhistidine*	Amino Acid	Histidine Metabolism	0.0801719	0.0237466	3.37615	0.00073509	0.417128	0.0341572
Pain	338	M43256	Known	N-acetyl-3-methylhistidine*	Amino Acid	Histidine Metabolism	0.186971	0.0525282	3.55944	0.000371645	0.316772	0.0316425
Pain	338	M33953	Known	N-acetylarginine	Amino Acid	Urea cycle; Arginine and Proline Metabolism	0.0730561	0.0212911	3.4313	0.000600701	0.382021	0.0341572
Pain	338	M48434	Known	N-acetylcitrulline	Amino Acid	Urea cycle; Arginine and Proline Metabolism	0.0733359	0.0210651	3.48139	0.000498813	0.356017	0.0316425
Pain	338	M48757	Known	N-acetylkynurenine (2)	Amino Acid	Tryptophan Metabolism	0.113409	0.0312054	3.63428	0.000278753	0.278804	0.0316425
Pain	338	M01587	Known	N-acetylleucine	Amino Acid	Leucine Isoleucine and Valine Metabolism	0.137466	0.0386774	3.55418	0.000379164	0.318409	0.0316425
Pain	338	M33950	Known	N-acetylphenylalanine	Amino Acid	Phenylalanine and Tyrosine Metabolism	0.105761	0.0309761	3.41426	0.000639548	0.392563	0.0341572
Pain	338	M32390	Known	N-acetyltyrosine	Amino Acid	Phenylalanine and Tyrosine Metabolism	0.106919	0.0274382	3.89672	9.75052e-05	0.154649	0.0316425
Pain	338	M43249	Known	N-delta-acetylornithine	Amino Acid	Urea cycle; Arginine and Proline Metabolism	-0.086492	0.0255402	-3.3865	0.000707895	0.412295	0.0341572
Pain	338	M43591	Known	N2 N5-diacetylornithine	Amino Acid	Urea cycle; Arginine and Proline Metabolism	0.189604	0.053849	3.52102	0.000429882	0.334799	0.0316425
Pain	338	M46960	Known	sulfate*	Xenobiotics	Chemical	0.576752	0.163376	3.53021	0.000415237	0.329507	0.0316425
Pain	338	M33132	Unknown	X - 11787	NA	NA	-0.166279	0.0454349	-3.65971	0.000252502	0.265374	0.0316425
Pain	338	M46458	Unknown	X - 12511	NA	NA	0.165275	0.0434281	3.80572	0.000141393	0.189358	0.0316425
Pain	338	M46971	Unknown	X - 21795	NA	NA	0.333042	0.0890475	3.74005	0.000183985	0.219275	0.0316425
Pain in joint	745	M27719	Known	galactonate	Carbohydrate	Fructose Mannose and Galactose Metabolism	-0.816536	0.135087	-6.04454	1.4984e-09	9.94156e-06	1.04438e-06
Pain in joint	745	M33009	Known	homostachydrine*	Xenobiotics	Food Component/Plant	0.45871	0.114498	4.00626	6.16882e-05	0.115272	0.0214983
Paraproteinemia	270.32	M47642	Unknown	X - 12101	NA	NA	1.4429	0.363057	3.9743	7.05857e-05	0.125438	0.0491982
Peripheral vascular disease	443	M02829	Known	N-formylmethionine	Amino Acid	Methionine Cysteine SAM and Taurine Metabolism	0.458622	0.115407	3.97396	7.06874e-05	0.125438	0.0492691
Personal history of diseases of digestive system	564.9	M52049	Unknown	X - 24020	NA	NA	-1.53888	0.373203	-4.12343	3.73271e-05	0.0850569	0.026017
Pituitary hyperfunction	253.1	M17747	Known	sphingosine	Lipid	Sphingolipid Metabolism	2.41802	0.607586	3.97971	6.89997e-05	0.123909	0.0480928
Pneumococcal pneumonia	480.11	M33230	Known	1-palmitoleoyl-GPC (16:1)*	Lipid	Lysolipid	1.60264	0.383778	4.17596	2.96733e-05	0.0735117	0.0206823
Pneumococcal pneumonia	480.11	M47118	Known	2-palmitoleoyl-GPC (16:1)*	Lipid	Lysolipid	2.0874	0.521611	4.00182	6.28563e-05	0.116239	0.0219054
Pneumococcal pneumonia	480.11	M01508	Known	pantothenate	Cofactors and Vitamins	Pantothenate and CoA Metabolism	2.55275	0.679155	3.75871	0.000170791	0.20854	0.0396805
Pneumonitis due to inhalation of food or vomitus	501	M33384	Known	salicyluric glucuronide*	Xenobiotics	Drug	0.797414	0.194002	4.11033	3.95087e-05	0.0869945	0.0275376
Portal hypertension	571.81	M38637	Known	cinnamoylglycine	Xenobiotics	Food Component/Plant	0.9991	0.24214	4.12613	3.68922e-05	0.0848286	0.0113711
Portal hypertension	571.81	M32388	Known	dodecanedioate	Lipid	Fatty Acid Dicarboxylate	1.47259	0.448241	3.28525	0.00101891	0.46296	0.0473452
Portal hypertension	571.81	M33949	Known	gamma-glutamylglycine	Peptide	Gamma-glutamyl Amino Acid	0.640828	0.164493	3.89577	9.78861e-05	0.154699	0.0113711
Portal hypertension	571.81	M00058	Known	glycine	Amino Acid	Glycine Serine and Threonine Metabolism	0.417327	0.0963415	4.33175	1.47928e-05	0.0438816	0.0103106
Portal hypertension	571.81	M35436	Known	hexanoylglycine	Lipid	Fatty Acid Metabolism(Acyl Glycine)	0.380905	0.10781	3.53312	0.000410684	0.328503	0.0282836
Portal hypertension	571.81	M35437	Known	isobutyrylglycine	Amino Acid	Leucine Isoleucine and Valine Metabolism	0.690065	0.17256	3.99899	6.36131e-05	0.117039	0.0113711
Portal hypertension	571.81	M35107	Known	isovalerylglycine	Amino Acid	Leucine Isoleucine and Valine Metabolism	0.773907	0.19591	3.95031	7.80496e-05	0.134598	0.0113711
Portal hypertension	571.81	M27710	Known	N-acetylglycine	Amino Acid	Glycine Serine and Threonine Metabolism	0.376111	0.107835	3.48783	0.000486949	0.354987	0.0282836
Portal hypertension	571.81	M44877	Known	N-palmitoyl-sphingosine (d18:1/16:0)	Lipid	Sphingolipid Metabolism	-0.952728	0.255801	-3.72449	0.000195708	0.226802	0.0194869
Portal hypertension	571.81	M31932	Known	propionylglycine	Lipid	Fatty Acid Metabolism (also BCAA Metabolism)	0.434435	0.1243	3.49506	0.000473959	0.350329	0.0282836
Portal hypertension	571.81	M48980	Known	tigloylglycine	Amino Acid	Leucine Isoleucine and Valine Metabolism	0.60742	0.168563	3.60351	0.000313947	0.296598	0.0273526
Portal hypertension	571.81	M47013	Unknown	X - 16570	NA	NA	0.479793	0.134829	3.55854	0.000372925	0.316976	0.0282836
Portal hypertension	571.81	M46994	Unknown	X - 17367	NA	NA	0.838606	0.213762	3.92308	8.74236e-05	0.143368	0.0113711
Portal hypertension	571.81	M47739	Unknown	X - 22475	NA	NA	-0.988338	0.297328	-3.32406	0.000887169	0.443431	0.0441683
Portal hypertension	571.81	M48993	Unknown	X - 23294	NA	NA	-0.749136	0.223458	-3.35246	0.000800954	0.431393	0.0429435
Primary hypercoagulable state	286.81	M17769	Known	sphinganine	Lipid	Sphingolipid Metabolism	3.76622	0.717224	5.25111	1.51185e-07	0.000710291	0.000105376
Primary hypercoagulable state	286.81	M17747	Known	sphingosine	Lipid	Sphingolipid Metabolism	1.62842	0.389763	4.17798	2.94108e-05	0.0734559	0.0102497
Pulmonary collapse; interstitial and compensatory emphysema	508	M27719	Known	galactonate	Carbohydrate	Fructose Mannose and Galactose Metabolism	0.773087	0.174039	4.44204	8.91082e-06	0.02796	0.00621084
Pulmonary embolism and infarction, acute	415.11	M17769	Known	sphinganine	Lipid	Sphingolipid Metabolism	3.64822	0.432777	8.42979	3.46283e-17	5.18922e-13	2.41359e-14
Pulmonary embolism and infarction, acute	415.11	M17747	Known	sphingosine	Lipid	Sphingolipid Metabolism	1.58935	0.237273	6.69839	2.10728e-11	1.74434e-07	7.34386e-09
Pulmonary heart disease	415	M17769	Known	sphinganine	Lipid	Sphingolipid Metabolism	1.42371	0.280877	5.06881	4.00302e-07	0.00171461	0.00027901
Pulmonary heart disease	415	M17747	Known	sphingosine	Lipid	Sphingolipid Metabolism	0.729093	0.157746	4.62196	3.8014e-06	0.0134204	0.00132479
Regional enteritis	555.1	M52603	Known	1 2-dilinoleoyl-GPC (18:2/18:2)	Lipid	Phospholipid Metabolism	0.503489	0.135287	3.72162	0.000197947	0.227275	0.00453311
Regional enteritis	555.1	M19132	Known	1 2-distearoyl-GPC (18:0/18:0)	Lipid	Phospholipid Metabolism	-1.07732	0.296272	-3.63623	0.000276655	0.277024	0.00535634
Regional enteritis	555.1	M52673	Known	1-(1-enyl-palmitoyl)-2-arachidonoyl-GPE (P-16:0/20:4)*	Lipid	Plasmalogen	-0.661907	0.166639	-3.9721	7.12429e-05	0.125636	0.00303782
Regional enteritis	555.1	M52613	Known	1-(1-enyl-stearoyl)-2-arachidonoyl-GPC (P-18:0/20:4)	Lipid	Plasmalogen	-0.354386	0.0915954	-3.86904	0.000109265	0.163589	0.00331119
Regional enteritis	555.1	M52475	Known	1-(1-enyl-stearoyl)-2-arachidonoyl-GPE (P-18:0/20:4)*	Lipid	Plasmalogen	-0.585756	0.162149	-3.61246	0.000303309	0.291889	0.00571369
Regional enteritis	555.1	M52748	Known	1-(1-enyl-stearoyl)-2-linoleoyl-GPE (P-18:0/18:2)*	Lipid	Plasmalogen	0.53448	0.18288	2.92257	0.00347152	0.635313	0.041011
Regional enteritis	555.1	M52698	Known	1-adrenoyl-GPC (22:4)*	Lipid	Lysolipid	-0.686543	0.169194	-4.05773	4.95511e-05	0.101575	0.00303782
Regional enteritis	555.1	M33228	Known	1-arachidonoyl-GPC (20:4n6)*	Lipid	Lysolipid	-0.270117	0.0643999	-4.19436	2.73637e-05	0.0703652	0.00303782
Regional enteritis	555.1	M35186	Known	1-arachidonoyl-GPE (20:4n6)*	Lipid	Lysolipid	-0.328528	0.0948695	-3.46294	0.000534304	0.363608	0.00931025
Regional enteritis	555.1	M34214	Known	1-arachidonoyl-GPI (20:4)*	Lipid	Lysolipid	-0.330808	0.114116	-2.89887	0.00374505	0.644053	0.0427918
Regional enteritis	555.1	M34397	Known	1-arachidonylglycerol (20:4)	Lipid	Monoacylglycerol	-0.672853	0.194892	-3.45245	0.000555528	0.370278	0.00936272
Regional enteritis	555.1	M33871	Known	1-dihomo-linoleoyl-GPC (20:2)*	Lipid	Lysolipid	0.407895	0.131627	3.09886	0.00194268	0.555748	0.0264615
Regional enteritis	555.1	M33822	Known	1-docosahexaenoyl-GPC (22:6)*	Lipid	Lysolipid	-0.703492	0.15837	-4.44208	8.90923e-06	0.02796	0.00303782
Regional enteritis	555.1	M37231	Known	1-docosapentaenoyl-GPC (22:5n3)*	Lipid	Lysolipid	-0.41408	0.141121	-2.93421	0.00334398	0.628694	0.0401854
Regional enteritis	555.1	M45675	Known	1-docosapentaenoyl-GPC (22:5n6)*	Lipid	Lysolipid	-0.549005	0.184887	-2.96941	0.00298369	0.612553	0.0378115
Regional enteritis	555.1	M44563	Known	1-eicosapentaenoyl-GPC (20:5)*	Lipid	Lysolipid	-0.387002	0.0963818	-4.0153	5.93701e-05	0.111693	0.00303782
Regional enteritis	555.1	M47888	Known	1-eicosapentaenoyl-GPE (20:5)*	Lipid	Lysolipid	-0.64214	0.196521	-3.26753	0.0010849	0.470316	0.0160889
Regional enteritis	555.1	M49617	Known	1-lignoceroyl-GPC (24:0)	Lipid	Lysolipid	-1.39773	0.405341	-3.44827	0.000564181	0.374037	0.00936272
Regional enteritis	555.1	M52710	Known	1-linoleoyl-2-arachidonoyl-GPC (18:2/20:4n6)*	Lipid	Phospholipid Metabolism	-0.61623	0.148268	-4.15618	3.23613e-05	0.0774852	0.00303782
Regional enteritis	555.1	M36600	Known	1-linoleoyl-GPE (18:2)*	Lipid	Lysolipid	0.775117	0.197732	3.92004	8.85335e-05	0.144642	0.00303782
Regional enteritis	555.1	M52500	Known	1-margaroyl-2-linoleoyl-GPC (17:0/18:2)*	Lipid	Phospholipid Metabolism	0.56772	0.178541	3.17978	0.00147387	0.514319	0.020965
Regional enteritis	555.1	M52707	Known	1-myristoyl-2-linoleoyl-GPC (14:0/18:2)*	Lipid	Phospholipid Metabolism	0.701701	0.190052	3.69215	0.000222365	0.243642	0.00469661
Regional enteritis	555.1	M52453	Known	1-oleoyl-2-linoleoyl-GPC (18:1/18:2)*	Lipid	Phospholipid Metabolism	0.378631	0.130402	2.90357	0.00368933	0.642547	0.0427918
Regional enteritis	555.1	M52451	Known	1-oleoyl-2-linoleoyl-GPI (18:1/18:2)*	Lipid	Phospholipid Metabolism	0.548798	0.162056	3.38648	0.000707956	0.412295	0.0114755
Regional enteritis	555.1	M52683	Known	1-palmitoleoyl-2-linoleoyl-GPC (16:1/18:2)*	Lipid	Phospholipid Metabolism	0.504556	0.136976	3.68354	0.000230013	0.248654	0.00471527
Regional enteritis	555.1	M52462	Known	1-palmitoyl-2-arachidonoyl-GPC (16:0/20:4)	Lipid	Phospholipid Metabolism	-0.285532	0.0709168	-4.0263	5.66621e-05	0.10805	0.00303782
Regional enteritis	555.1	M52610	Known	1-palmitoyl-2-docosahexaenoyl-GPC (16:0/22:6)	Lipid	Phospholipid Metabolism	-0.792027	0.198741	-3.98522	6.74189e-05	0.122274	0.00303782
Regional enteritis	555.1	M52463	Known	1-palmitoyl-2-eicosapentaenoyl-GPC (16:0/20:5)*	Lipid	Phospholipid Metabolism	-0.390099	0.111851	-3.48767	0.000487242	0.354987	0.00870788
Regional enteritis	555.1	M52684	Known	1-palmitoyl-2-linolenoyl-GPC (16:0/18:3)*	Lipid	Phospholipid Metabolism	0.500788	0.123348	4.05997	4.90783e-05	0.101564	0.00303782
Regional enteritis	555.1	M42446	Known	1-palmitoyl-2-linoleoyl-GPC (16:0/18:2)	Lipid	Phospholipid Metabolism	0.489917	0.148681	3.29508	0.000983937	0.460031	0.0152401
Regional enteritis	555.1	M52450	Known	1-palmitoyl-2-linoleoyl-GPI (16:0/18:2)	Lipid	Phospholipid Metabolism	0.372299	0.120326	3.09409	0.00197417	0.55915	0.0264615
Regional enteritis	555.1	M52737	Known	1-palmitoyl-2-meadoyl-GPC (16:0/20:3n9)*	Lipid	Phospholipid Metabolism	-0.50016	0.140359	-3.56344	0.000366032	0.316573	0.0067138
Regional enteritis	555.1	M52616	Known	1-palmitoyl-2-stearoyl-GPC (16:0/18:0)	Lipid	Phospholipid Metabolism	-0.737751	0.195147	-3.7805	0.000156516	0.199544	0.00389612
Regional enteritis	555.1	M52718	Known	1-palmityl-2-arachidonoyl-GPC (O-16:0/20:4)*	Lipid	Phospholipid Metabolism	-0.370141	0.0929209	-3.9834	6.7935e-05	0.122503	0.00303782
Regional enteritis	555.1	M52497	Known	1-pentadecanoyl-2-linoleoyl-GPC (15:0/18:2)*	Lipid	Phospholipid Metabolism	0.799984	0.214736	3.72543	0.000194979	0.226259	0.00453311
Regional enteritis	555.1	M42450	Known	1-stearoyl-2-arachidonoyl-GPC (18:0/20:4)	Lipid	Phospholipid Metabolism	-0.224742	0.0583751	-3.84997	0.000118133	0.171981	0.00343078
Regional enteritis	555.1	M52611	Known	1-stearoyl-2-docosahexaenoyl-GPC (18:0/22:6)	Lipid	Phospholipid Metabolism	-0.679821	0.171692	-3.95953	7.50961e-05	0.130802	0.00303782
Regional enteritis	555.1	M52700	Known	1-stearoyl-2-docosapentaenoyl-GPC (18:0/22:5n6)*	Lipid	Phospholipid Metabolism	-0.469409	0.144208	-3.25507	0.00113364	0.478258	0.0164614
Regional enteritis	555.1	M52452	Known	1-stearoyl-2-linoleoyl-GPC (18:0/18:2)*	Lipid	Phospholipid Metabolism	0.605956	0.196866	3.07801	0.00208385	0.564479	0.0274046
Regional enteritis	555.1	M52738	Known	1-stearoyl-2-meadoyl-GPC (18:0/20:3n9)*	Lipid	Phospholipid Metabolism	-0.522959	0.132444	-3.94853	7.86331e-05	0.134641	0.00303782
Regional enteritis	555.1	M52703	Known	1-stearyl-GPC (O-18:0)*	Lipid	Lyso-phospho-ether	-1.45649	0.443337	-3.28529	0.00101878	0.46296	0.0154368
Regional enteritis	555.1	M33387	Known	2-arachidonoyl-GPC (20:4)*	Lipid	Lysolipid	-0.327558	0.0778667	-4.20664	2.59191e-05	0.0670472	0.00303782
Regional enteritis	555.1	M32815	Known	2-arachidonoyl-GPE (20:4)*	Lipid	Lysolipid	-0.440827	0.119023	-3.7037	0.000212482	0.237684	0.00462811
Regional enteritis	555.1	M46203	Known	2-docosahexaenoyl-GPC (22:6)*	Lipid	Lysolipid	-0.687105	0.175639	-3.91202	9.1527e-05	0.147591	0.00303782
Regional enteritis	555.1	M37253	Known	2-hydroxyglutarate	Lipid	Fatty Acid Dicarboxylate	0.869854	0.224509	3.87448	0.000106853	0.162086	0.00331119
Regional enteritis	555.1	M36593	Known	2-linoleoyl-GPE (18:2)*	Lipid	Lysolipid	0.833591	0.212809	3.91708	8.96294e-05	0.146158	0.00303782
Regional enteritis	555.1	M01110	Known	arachidonate (20:4n6)	Lipid	Polyunsaturated Fatty Acid (n3 and n6)	-0.366228	0.0876138	-4.18002	2.91484e-05	0.0734403	0.00303782
Regional enteritis	555.1	M33997	Known	campesterol	Lipid	Sterol	-0.317181	0.111442	-2.84615	0.0044252	0.66088	0.0489581
Regional enteritis	555.1	M44675	Known	docosahexaenoate (DHA; 22:6n3)	Lipid	Polyunsaturated Fatty Acid (n3 and n6)	-1.05359	0.246695	-4.27082	1.94759e-05	0.0532317	0.00303782
Regional enteritis	555.1	M32504	Known	docosapentaenoate (n3 DPA; 22:5n3)	Lipid	Polyunsaturated Fatty Acid (n3 and n6)	-0.917279	0.225575	-4.0664	4.7746e-05	0.0997568	0.00303782
Regional enteritis	555.1	M18467	Known	eicosapentaenoate (EPA; 20:5n3)	Lipid	Polyunsaturated Fatty Acid (n3 and n6)	-0.47142	0.116516	-4.04597	5.21068e-05	0.103874	0.00303782
Regional enteritis	555.1	M33364	Known	gamma-glutamylthreonine*	Peptide	Gamma-glutamyl Amino Acid	-0.780769	0.251804	-3.10071	0.00193059	0.554849	0.0264615
Regional enteritis	555.1	M33009	Known	homostachydrine*	Xenobiotics	Food Component/Plant	-1.15431	0.316353	-3.6488	0.000263472	0.271185	0.00524685
Regional enteritis	555.1	M34407	Known	isovalerylcarnitine	Amino Acid	Leucine Isoleucine and Valine Metabolism	-0.350192	0.11918	-2.93834	0.00329971	0.625921	0.0401854
Regional enteritis	555.1	M52719	Known	phosphatidylcholine (16:0/22:5n3 18:1/20:4)*	Lipid	Phospholipid Metabolism	-0.320364	0.0861894	-3.71698	0.000201616	0.22962	0.00453311
Regional enteritis	555.1	M52720	Known	phosphatidylcholine (18:0/20:5 16:0/22:5n6)*	Lipid	Phospholipid Metabolism	-0.337201	0.0880585	-3.82928	0.000128519	0.180018	0.0035831
Regional enteritis	555.1	M42459	Known	sphingomyelin (d18:2/16:0 d18:1/16:1)*	Lipid	Sphingolipid Metabolism	-1.35262	0.443533	-3.04966	0.00229101	0.573008	0.029571
Regional enteritis	555.1	M33969	Known	stearidonate (18:4n3)	Lipid	Polyunsaturated Fatty Acid (n3 and n6)	-0.472445	0.164924	-2.86461	0.00417517	0.654443	0.046937
Regional enteritis	555.1	M01284	Known	threonine	Amino Acid	Glycine Serine and Threonine Metabolism	-0.8387	0.283447	-2.95893	0.00308707	0.619173	0.038423
Regional enteritis	555.1	M37097	Known	tryptophan betaine	Amino Acid	Tryptophan Metabolism	0.492704	0.129596	3.80186	0.000143616	0.190864	0.00385001
Regional enteritis	555.1	M48207	Unknown	X - 22850	NA	NA	1.41366	0.420452	3.36224	0.000773136	0.424282	0.0122472
Regional enteritis	555.1	M49583	Unknown	X - 23705	NA	NA	-0.426863	0.108771	-3.92443	8.69349e-05	0.143107	0.00303782
Regional enteritis	555.1	M52083	Unknown	X - 24054	NA	NA	0.848533	0.224179	3.78507	0.000153664	0.197559	0.00389612
Respiratory failure	509.1	M47112	Known	etiocholanolone glucuronide	Lipid	Steroid	0.168117	0.0385085	4.3657	1.26714e-05	0.0385775	0.00441597
Respiratory failure	509.1	M27719	Known	galactonate	Carbohydrate	Fructose Mannose and Galactose Metabolism	1.1065	0.234784	4.71286	2.44264e-06	0.00903114	0.00170252
Respiratory failure, insufficiency, arrest	509	M27719	Known	galactonate	Carbohydrate	Fructose Mannose and Galactose Metabolism	0.948396	0.210976	4.49527	6.94812e-06	0.0228751	0.00484284
Reticulosarcoma	202.22	M01589	Known	N-acetylmethionine	Amino Acid	Methionine Cysteine SAM and Taurine Metabolism	2.26683	0.570293	3.97485	7.04248e-05	0.125438	0.0461907
Reticulosarcoma	202.22	M48022	Unknown	X - 17677	NA	NA	-5.28012	1.38162	-3.82169	0.000132541	0.182278	0.0461907
Retinal edema	362.9	M00542	Known	3-hydroxybutyrate (BHBA)	Lipid	Ketone Bodies	4.3704	1.06998	4.08455	4.41617e-05	0.0940774	0.0307807
Rhabdomyolysis	772.4	M46962	Unknown	X - 12701	NA	NA	3.1932	0.828182	3.85568	0.000115411	0.169625	0.0402206
Rhabdomyolysis	772.4	M46673	Unknown	X - 16576	NA	NA	-1.75812	0.443364	-3.96541	7.327e-05	0.128653	0.0402206
Screening for malignant neoplasms of the skin	216.1	M27719	Known	galactonate	Carbohydrate	Fructose Mannose and Galactose Metabolism	-0.733309	0.180481	-4.06309	4.84279e-05	0.100698	0.0337543
Senile cataract	366.2	M27719	Known	galactonate	Carbohydrate	Fructose Mannose and Galactose Metabolism	-1.06302	0.221334	-4.80278	1.56478e-06	0.0059914	0.00109066
Senile dementia	290.13	M52616	Known	1-palmitoyl-2-stearoyl-GPC (16:0/18:0)	Lipid	Phospholipid Metabolism	2.08916	0.529124	3.94834	7.86941e-05	0.134641	0.0182833
Senile dementia	290.13	M18281	Known	2-hydroxyhippurate (salicylurate)	Xenobiotics	Benzoate Metabolism	8.10702	2.04103	3.97203	7.12627e-05	0.125636	0.0182833
Senile dementia	290.13	M44877	Known	N-palmitoyl-sphingosine (d18:1/16:0)	Lipid	Sphingolipid Metabolism	2.32889	0.544619	4.27619	1.90123e-05	0.0521284	0.0132516
Shock	797	M27719	Known	galactonate	Carbohydrate	Fructose Mannose and Galactose Metabolism	1.80997	0.416092	4.34994	1.36178e-05	0.0409551	0.00949159
Spinal stenosis of lumbar region	720.1	M27719	Known	galactonate	Carbohydrate	Fructose Mannose and Galactose Metabolism	-1.42055	0.305423	-4.65109	3.30186e-06	0.0118588	0.0023014
Splenomegaly	579.2	M38637	Known	cinnamoylglycine	Xenobiotics	Food Component/Plant	1.07181	0.281509	3.80739	0.000140444	0.188377	0.00889903
Splenomegaly	579.2	M33949	Known	gamma-glutamylglycine	Peptide	Gamma-glutamyl Amino Acid	0.819777	0.190005	4.3145	1.59964e-05	0.0463367	0.00431004
Splenomegaly	579.2	M00058	Known	glycine	Amino Acid	Glycine Serine and Threonine Metabolism	0.456892	0.111741	4.08883	4.33548e-05	0.0930424	0.0043169
Splenomegaly	579.2	M35437	Known	isobutyrylglycine	Amino Acid	Leucine Isoleucine and Valine Metabolism	0.82141	0.199115	4.1253	3.70245e-05	0.0848625	0.00431004
Splenomegaly	579.2	M35107	Known	isovalerylglycine	Amino Acid	Leucine Isoleucine and Valine Metabolism	0.960501	0.226489	4.24082	2.22701e-05	0.0590129	0.00431004
Splenomegaly	579.2	M27710	Known	N-acetylglycine	Amino Acid	Glycine Serine and Threonine Metabolism	0.566809	0.12447	4.55379	5.26882e-06	0.0178884	0.00367237
Splenomegaly	579.2	M33939	Known	N-acetylthreonine	Amino Acid	Glycine Serine and Threonine Metabolism	-1.90594	0.483491	-3.94204	8.0793e-05	0.136885	0.00703909
Splenomegaly	579.2	M31932	Known	propionylglycine	Lipid	Fatty Acid Metabolism (also BCAA Metabolism)	0.599527	0.143934	4.1653	3.10948e-05	0.0761304	0.00431004
Splenomegaly	579.2	M48980	Known	tigloylglycine	Amino Acid	Leucine Isoleucine and Valine Metabolism	0.760878	0.195574	3.8905	0.00010004	0.15588	0.00744091
Splenomegaly	579.2	M47013	Unknown	X - 16570	NA	NA	0.643411	0.155985	4.12482	3.71022e-05	0.0848625	0.00431004
Splenomegaly	579.2	M46994	Unknown	X - 17367	NA	NA	0.960172	0.247805	3.8747	0.000106756	0.162086	0.00744091
Splenomegaly	579.2	M47739	Unknown	X - 22475	NA	NA	-1.31399	0.348943	-3.76562	0.000166136	0.206895	0.00964973
Spontaneous ecchymoses	287.1	M45951	Known	1-linolenoyl-GPC (18:3)*	Lipid	Lysolipid	3.14061	0.834448	3.7637	0.000167418	0.207929	0.0467103
Spontaneous ecchymoses	287.1	M35172	Known	orotidine	Nucleotide	Pyrimidine Metabolism Orotate containing	-0.552583	0.148636	-3.71769	0.000201049	0.22962	0.0467103
Spontaneous ecchymoses	287.1	M01284	Known	threonine	Amino Acid	Glycine Serine and Threonine Metabolism	-3.99076	1.06492	-3.74749	0.000178614	0.215019	0.0467103
Sprains and strains	840	M27719	Known	galactonate	Carbohydrate	Fructose Mannose and Galactose Metabolism	-1.22063	0.261176	-4.6736	2.95964e-06	0.0106738	0.00206287
Sprains and strains of back and neck	841	M27719	Known	galactonate	Carbohydrate	Fructose Mannose and Galactose Metabolism	-2.11841	0.468514	-4.52156	6.13864e-06	0.020521	0.00427863
Sprains and strains of back and neck	841	M40469	Known	N1-Methyl-2-pyridone-5-carboxamide	Cofactors and Vitamins	Nicotinate and Nicotinamide Metabolism	-2.09933	0.484936	-4.32909	1.49727e-05	0.044114	0.00521797
Squamous cell carcinoma	172.22	M00607	Known	trans-urocanate	Amino Acid	Histidine Metabolism	-0.814638	0.198567	-4.10259	4.08558e-05	0.0889981	0.0284765
Subarachnoid hemorrhage (injury)	818.2	M52769	Unknown	X - 24452	NA	NA	-2.73482	0.644528	-4.24314	2.20412e-05	0.0587648	0.0153627
Suicide or self-inflicted injury	297.2	M46590	Unknown	X - 07765	NA	NA	3.10645	0.755454	4.11202	3.92206e-05	0.0869945	0.0273368
Synovitis and tenosynovitis	727.1	M27719	Known	galactonate	Carbohydrate	Fructose Mannose and Galactose Metabolism	-1.88391	0.335282	-5.61889	1.92194e-08	0.000107772	1.33959e-05
Synovitis and tenosynovitis	727.1	M01437	Known	succinate	Energy	TCA Cycle	-0.923678	0.228517	-4.04205	5.29865e-05	0.104777	0.0184658
Tobacco use disorder	318	M27719	Known	galactonate	Carbohydrate	Fructose Mannose and Galactose Metabolism	0.752838	0.180176	4.17834	2.93641e-05	0.0734559	0.0204667
Unspecified erythematous condition	695.9	M48997	Known	isoeugenol sulfate	Xenobiotics	Food Component/Plant	1062.51	209.1	5.08133	3.748e-07	0.0016288	0.000261236
Unstable angina (intermediate coronary syndrome)	411.1	M52478	Known	1-(1-enyl-palmitoyl)-2-oleoyl-GPC (P-16:0/18:1)*	Lipid	Plasmalogen	-0.765587	0.188163	-4.06875	4.72665e-05	0.0994724	0.00549079
Unstable angina (intermediate coronary syndrome)	411.1	M48492	Known	behenoyl sphingomyelin (d18:1/22:0)*	Lipid	Sphingolipid Metabolism	1.13495	0.297479	3.81524	0.00013605	0.184764	0.0135467
Unstable angina (intermediate coronary syndrome)	411.1	M00063	Known	cholesterol	Lipid	Sterol	0.705874	0.137163	5.14625	2.65744e-07	0.00119147	9.26118e-05
Unstable angina (intermediate coronary syndrome)	411.1	M44877	Known	N-palmitoyl-sphingosine (d18:1/16:0)	Lipid	Sphingolipid Metabolism	0.634324	0.179533	3.53318	0.000410587	0.328503	0.0357724
Unstable angina (intermediate coronary syndrome)	411.1	M52434	Known	palmitoyl dihydrosphingomyelin (d18:0/16:0)*	Lipid	Sphingolipid Metabolism	0.575244	0.127573	4.50913	6.50953e-06	0.0215126	0.00151238
Unstable angina (intermediate coronary syndrome)	411.1	M37506	Known	palmitoyl sphingomyelin (d18:1/16:0)	Lipid	Sphingolipid Metabolism	0.825562	0.135465	6.09428	1.09934e-09	7.35004e-06	7.66243e-07
Unstable angina (intermediate coronary syndrome)	411.1	M52615	Known	sphingomyelin (d18:1/17:0 d17:1/18:0 d19:1/16:0)	Lipid	Sphingolipid Metabolism	0.700793	0.160537	4.36531	1.26941e-05	0.0385775	0.00221194
Unstable angina (intermediate coronary syndrome)	411.1	M19503	Known	stearoyl sphingomyelin (d18:1/18:0)	Lipid	Sphingolipid Metabolism	0.511936	0.120114	4.26208	2.02533e-05	0.0550105	0.00282331
Uveitis, noninfectious or NOS	371.1	M52769	Unknown	X - 24452	NA	NA	-2.06073	0.454671	-4.53235	5.83321e-06	0.0195752	0.00406575
Vascular dementia	290.16	M18281	Known	2-hydroxyhippurate (salicylurate)	Xenobiotics	Benzoate Metabolism	8.05474	1.81314	4.44241	8.89561e-06	0.02796	0.00620024
Vascular dementia	290.16	M00063	Known	cholesterol	Lipid	Sterol	1.83976	0.473106	3.88868	0.00010079	0.156155	0.0351254
Vascular dementia	290.16	M44877	Known	N-palmitoyl-sphingosine (d18:1/16:0)	Lipid	Sphingolipid Metabolism	2.13301	0.566038	3.76833	0.000164347	0.205889	0.0381832
Visual field defects	368.4	M37207	Known	4-androsten-3alpha 17alpha-diol monosulfate (2)	Lipid	Steroid	1.00085	0.223146	4.48521	7.28436e-06	0.0238848	0.0050772
Visual field defects	368.4	M37202	Known	4-androsten-3beta 17beta-diol disulfate (1)	Lipid	Steroid	-0.752792	0.178599	-4.21498	2.49796e-05	0.0650037	0.00580359
Visual field defects	368.4	M37185	Known	5alpha-androstan-3alpha 17beta-diol monosulfate (2)	Lipid	Steroid	0.703928	0.163564	4.30369	1.6798e-05	0.0477127	0.00580359
Visual field defects	368.4	M46599	Unknown	X - 11440	NA	NA	-0.588799	0.142662	-4.12724	3.67146e-05	0.0846442	0.00639753
Wegener's granulomatosis	446.4	M00053	Known	glutamine	Amino Acid	Glutamate Metabolism	-2.43761	0.568345	-4.28895	1.79517e-05	0.0501699	0.0125123

## Sheet: ST2
Supplemental table 2: The association of the genetic risk score for metabolites and BioVU phenotypes in African ancestry.
Phenotype	Phenotype codes	Metabolite ID	Metabolite biochemical name	Super pathway	Sub pathway	Estimate	Standard Error	z value	Pr(>|z|)	fdr_p	Phen_fdr_p
Fracture of tibia and fibula	800.3	M33140	X - 11795			-2596917719718410	1.26819e+07	-2.04774e+08	0	0	0
Hyperlipidemia	272.1	M37506	palmitoyl sphingomyelin (d18:1/16:0)	Lipid	Sphingolipid Metabolism	1.09085	0.1375	7.93343	2.13174e-15	4.45746e-10	1.48582e-12
Hyperlipidemia	272.1	M00063	cholesterol	Lipid	Sterol	1.00183	0.128434	7.8004	6.17094e-15	8.60228e-10	2.15057e-12
Disorders of lipoid metabolism	272	M37506	palmitoyl sphingomyelin (d18:1/16:0)	Lipid	Sphingolipid Metabolism	1.07131	0.141594	7.56609	3.84629e-14	4.02129e-09	2.68086e-11
Hyperlipidemia	272.1	M48492	behenoyl sphingomyelin (d18:1/22:0)*	Lipid	Sphingolipid Metabolism	1.90889	0.261685	7.29463	2.99487e-13	2.50491e-08	6.95809e-11
Disorders of lipoid metabolism	272	M00063	cholesterol	Lipid	Sterol	0.947778	0.13208	7.17578	7.18973e-13	5.01124e-08	2.50562e-10
Disorders of lipoid metabolism	272	M48492	behenoyl sphingomyelin (d18:1/22:0)*	Lipid	Sphingolipid Metabolism	1.82266	0.269172	6.77134	1.27594e-11	6.66999e-07	2.96444e-09
Hypercholesterolemia	272.11	M37506	palmitoyl sphingomyelin (d18:1/16:0)	Lipid	Sphingolipid Metabolism	1.4809	0.220092	6.72855	1.71363e-11	7.96265e-07	5.97199e-09
Hypercholesterolemia	272.11	M48492	behenoyl sphingomyelin (d18:1/22:0)*	Lipid	Sphingolipid Metabolism	3.08199	0.453756	6.79219	1.10446e-11	6.59835e-07	5.97199e-09
Hypercholesterolemia	272.11	M00063	cholesterol	Lipid	Sterol	1.34637	0.203988	6.60025	4.1047e-11	1.71659e-06	9.53659e-09
Mixed hyperlipidemia	272.13	M00063	cholesterol	Lipid	Sterol	0.917521	0.153703	5.96944	2.38067e-09	9.01806e-05	9.01806e-07
Mixed hyperlipidemia	272.13	M37506	palmitoyl sphingomyelin (d18:1/16:0)	Lipid	Sphingolipid Metabolism	0.975385	0.16377	5.95582	2.58768e-09	9.01806e-05	9.01806e-07
Mixed hyperlipidemia	272.13	M48492	behenoyl sphingomyelin (d18:1/22:0)*	Lipid	Sphingolipid Metabolism	1.7688	0.313637	5.63964	1.70407e-08	0.000548185	3.95912e-06
Hypercholesterolemia	272.11	M44877	N-palmitoyl-sphingosine (d18:1/16:0)	Lipid	Sphingolipid Metabolism	1.6402	0.297555	5.51226	3.5426e-08	0.00105822	6.17298e-06
Hyperlipidemia	272.1	M52434	palmitoyl dihydrosphingomyelin (d18:0/16:0)*	Lipid	Sphingolipid Metabolism	0.584026	0.108265	5.3944	6.87541e-08	0.00191687	1.19804e-05
Disorders of lipoid metabolism	272	M52434	palmitoyl dihydrosphingomyelin (d18:0/16:0)*	Lipid	Sphingolipid Metabolism	0.596739	0.111593	5.34747	8.91915e-08	0.00233124	1.55416e-05
Disorders of lipoid metabolism	272	M44877	N-palmitoyl-sphingosine (d18:1/16:0)	Lipid	Sphingolipid Metabolism	1.01754	0.195001	5.2181	1.80768e-07	0.00444689	2.5199e-05
Hyperlipidemia	272.1	M44877	N-palmitoyl-sphingosine (d18:1/16:0)	Lipid	Sphingolipid Metabolism	0.968384	0.189052	5.12231	3.01822e-07	0.00701232	4.20739e-05
Hypercholesterolemia	272.11	M52616	1-palmitoyl-2-stearoyl-GPC (16:0/18:0)	Lipid	Phospholipid Metabolism	1.72368	0.342759	5.02883	4.93488e-07	0.0108619	6.87922e-05
Hyperlipidemia	272.1	M52616	1-palmitoyl-2-stearoyl-GPC (16:0/18:0)	Lipid	Phospholipid Metabolism	1.09742	0.220991	4.96593	6.83734e-07	0.0136161	7.94271e-05
Hyperlipidemia	272.1	M52615	sphingomyelin (d18:1/17:0 d17:1/18:0 d19:1/16:0)	Lipid	Sphingolipid Metabolism	0.6516	0.134488	4.84503	1.26591e-06	0.0220586	0.000126049
Disorders of lipoid metabolism	272	M52616	1-palmitoyl-2-stearoyl-GPC (16:0/18:0)	Lipid	Phospholipid Metabolism	1.10975	0.227913	4.8692	1.12049e-06	0.0203735	0.000130164
Disorders of lipoid metabolism	272	M52615	sphingomyelin (d18:1/17:0 d17:1/18:0 d19:1/16:0)	Lipid	Sphingolipid Metabolism	0.65772	0.138757	4.74007	2.1364e-06	0.0357377	0.000212725
Disorders of function of stomach	536	M32401	trigonelline (N'-methylnicotinate)	Cofactors and Vitamins	Nicotinate and Nicotinamide Metabolism	-6.19228	1.23812	-5.00134	5.69336e-07	0.0119048	0.000396827
Effects radiation NOS	990	M46371	X - 21327			-3.47054	0.707228	-4.90724	9.23648e-07	0.0175577	0.000643782
Mixed hyperlipidemia	272.13	M52434	palmitoyl dihydrosphingomyelin (d18:0/16:0)*	Lipid	Sphingolipid Metabolism	0.589294	0.130044	4.53148	5.85718e-06	0.0845147	0.00102061
Hypercholesterolemia	272.11	M52434	palmitoyl dihydrosphingomyelin (d18:0/16:0)*	Lipid	Sphingolipid Metabolism	0.745813	0.171698	4.34376	1.40064e-05	0.146437	0.00162708
Sepsis and SIRS	994	M52474	1-(1-enyl-palmitoyl)-GPC (P-16:0)*	Lipid	Lysoplasmalogen	-2.44808	0.526008	-4.65408	3.25429e-06	0.052344	0.00226824
Encounter for long-term (current) use of anticoagulants, antithrombotics, aspirin	457	M33228	1-arachidonoyl-GPC (20:4n6)*	Lipid	Lysolipid	-1.22215	0.271985	-4.49344	7.0081e-06	0.0915871	0.00244232
Encounter for long-term (current) use of anticoagulants, antithrombotics, aspirin	457	M44563	1-eicosapentaenoyl-GPC (20:5)*	Lipid	Lysolipid	-1.87081	0.410067	-4.5622	5.06196e-06	0.0784041	0.00244232
Sepsis and SIRS	994	M52689	1-(1-enyl-palmitoyl)-2-arachidonoyl-GPC (P-16:0/20:4)*	Lipid	Plasmalogen	-1.03747	0.23443	-4.42552	9.62112e-06	0.11834	0.00335296
Fracture of foot	801.1	M47031	2-methoxyacetaminophen sulfate*	Xenobiotics	Drug	2.69214	0.59439	4.52926	5.9192e-06	0.0845147	0.00412568
Gout	274.1	M46368	X - 18914			1.11828	0.247179	4.52419	6.06275e-06	0.0845147	0.00422574
Gout	274.1	M47901	X - 11485			4.89354	1.12087	4.36586	1.26622e-05	0.139351	0.00441279
Other disorders of arteries and arterioles	447	M33161	2-methoxyacetaminophen glucuronide*	Xenobiotics	Drug	2.5242	0.55993	4.50807	6.54186e-06	0.0882517	0.00455967
Gout	274.1	M01604	urate	Nucleotide	Purine Metabolism (Hypo)Xanthine/Inosine containing	1.06909	0.251455	4.25164	2.12211e-05	0.195247	0.00493036
Infection/inflammation of internal prosthetic device; implant; and graft	81	M52720	phosphatidylcholine (18:0/20:5 16:0/22:5n6)*	Lipid	Phospholipid Metabolism	-1.57678	0.354711	-4.44525	8.77898e-06	0.111254	0.00611895
Gout	274.1	M46403	X - 21358			3.97229	0.960275	4.13662	3.52465e-05	0.237853	0.0061417
Mixed hyperlipidemia	272.13	M44877	N-palmitoyl-sphingosine (d18:1/16:0)	Lipid	Sphingolipid Metabolism	0.920902	0.22583	4.07786	4.54516e-05	0.267717	0.00633596
Nonrheumatic mitral valve disorders	395.1	M38178	cis-4-decenoyl carnitine	Lipid	Fatty Acid Metabolism(Acyl Carnitine)	-1.60455	0.363096	-4.41907	9.91281e-06	0.118444	0.00690923
Adult failure to thrive	260.3	M52748	1-(1-enyl-stearoyl)-2-linoleoyl-GPE (P-18:0/18:2)*	Lipid	Plasmalogen	3.48833	0.796093	4.38181	1.17697e-05	0.134389	0.00820345
Intestinal infection due to C. difficile	8.52	M46598	X - 11438			4.84662	1.10664	4.3796	1.189e-05	0.134389	0.00828732
Disorders of lipoid metabolism	272	M19503	stearoyl sphingomyelin (d18:1/18:0)	Lipid	Sphingolipid Metabolism	0.514163	0.131832	3.90015	9.61337e-05	0.349508	0.00837565
Intestinal infection due to C. difficile	8.52	M32401	trigonelline (N'-methylnicotinate)	Cofactors and Vitamins	Nicotinate and Nicotinamide Metabolism	-6.05457	1.43452	-4.22061	2.43637e-05	0.206934	0.00849075
Encounter for long-term (current) use of anticoagulants, antithrombotics, aspirin	457	M01110	arachidonate (20:4n6)	Lipid	Polyunsaturated Fatty Acid (n3 and n6)	-1.61884	0.392654	-4.12281	3.74274e-05	0.239462	0.00869562
Cardiogenic shock	797.1	M00059	histidine	Amino Acid	Histidine Metabolism	2.74431	0.629557	4.35912	1.30587e-05	0.14003	0.00910193
Gout	274.1	M46366	X - 18249			1.26275	0.316624	3.98818	6.65813e-05	0.31349	0.00928144
Nonrheumatic mitral valve disorders	395.1	M33941	decanoylcarnitine	Lipid	Fatty Acid Metabolism(Acyl Carnitine)	-1.55141	0.36937	-4.20017	2.66717e-05	0.208783	0.00929509
Nonrheumatic mitral valve disorders	395.1	M33936	octanoylcarnitine	Lipid	Fatty Acid Metabolism(Acyl Carnitine)	-1.18547	0.288855	-4.10401	4.06041e-05	0.253442	0.00943369
Hyperlipidemia	272.1	M52435	sphingomyelin (d18:2/23:0 d18:1/23:1 d17:1/24:1)*	Lipid	Sphingolipid Metabolism	0.783163	0.203383	3.85068	0.00011779	0.371016	0.0102625
Encounter for long-term (current) use of aspirin	457.3	M18467	eicosapentaenoate (EPA; 20:5n3)	Lipid	Polyunsaturated Fatty Acid (n3 and n6)	-1.35402	0.324493	-4.17273	3.00975e-05	0.224764	0.010489
Encounter for long-term (current) use of aspirin	457.3	M44563	1-eicosapentaenoyl-GPC (20:5)*	Lipid	Lysolipid	-1.14816	0.273168	-4.20311	2.63268e-05	0.208783	0.010489
Type 2 diabetes with neurological manifestations	250.24	M32401	trigonelline (N'-methylnicotinate)	Cofactors and Vitamins	Nicotinate and Nicotinamide Metabolism	-5.01016	1.16062	-4.31681	1.58297e-05	0.161463	0.0110333
Encounter for long-term (current) use of anticoagulants, antithrombotics, aspirin	457	M52720	phosphatidylcholine (18:0/20:5 16:0/22:5n6)*	Lipid	Phospholipid Metabolism	-1.44546	0.36272	-3.98505	6.74655e-05	0.31349	0.0117559
Encounter for long-term (current) use of aspirin	457.3	M33228	1-arachidonoyl-GPC (20:4n6)*	Lipid	Lysolipid	-0.736172	0.182735	-4.02862	5.61045e-05	0.294778	0.0122885
Encounter for long-term (current) use of aspirin	457.3	M52677	1-(1-enyl-palmitoyl)-2-linoleoyl-GPE (P-16:0/18:2)*	Lipid	Plasmalogen	1.51082	0.380126	3.97452	7.05223e-05	0.319814	0.0122885
Gout	274.1	M48441	4-hydroxychlorothalonil	Xenobiotics	Chemical	0.876524	0.2263	3.87328	0.000107381	0.36215	0.012474
Hypertensive chronic kidney disease	401.22	M33946	N-acetylhistidine	Amino Acid	Histidine Metabolism	-0.338149	0.0788876	-4.28646	1.81541e-05	0.180763	0.0126534
Infection/inflammation of internal prosthetic device; implant; and graft	81	M33228	1-arachidonoyl-GPC (20:4n6)*	Lipid	Lysolipid	-1.1039	0.2679	-4.12058	3.77917e-05	0.239462	0.0131704
Encounter for long-term (current) use of anticoagulants, antithrombotics, aspirin	457	M18467	eicosapentaenoate (EPA; 20:5n3)	Lipid	Polyunsaturated Fatty Acid (n3 and n6)	-1.91333	0.492511	-3.88485	0.000102393	0.353889	0.0133442
Encounter for long-term (current) use of anticoagulants, antithrombotics, aspirin	457	M52463	1-palmitoyl-2-eicosapentaenoyl-GPC (16:0/20:5)*	Lipid	Phospholipid Metabolism	-2.03457	0.527524	-3.85682	0.000114872	0.366712	0.0133442
Infection/inflammation of internal prosthetic device; implant; and graft	81	M37058	succinylcarnitine	Energy	TCA Cycle	-1.1571	0.287619	-4.02303	5.74553e-05	0.294778	0.0133488
Encounter for long-term (current) use of anticoagulants, antithrombotics, aspirin	457	M49617	1-lignoceroyl-GPC (24:0)	Lipid	Lysolipid	-7.69315	2.01659	-3.81493	0.000136222	0.373896	0.0135638
Retention of urine	599.2	M52463	1-palmitoyl-2-eicosapentaenoyl-GPC (16:0/20:5)*	Lipid	Phospholipid Metabolism	-1.83912	0.430777	-4.26932	1.9607e-05	0.190689	0.0136661
Urinary tract infection	591	M52689	1-(1-enyl-palmitoyl)-2-arachidonoyl-GPC (P-16:0/20:4)*	Lipid	Plasmalogen	-0.5929	0.139319	-4.25569	2.08404e-05	0.195247	0.0145257
Cirrhosis of liver without mention of alcohol	571.51	M02132	citrulline	Amino Acid	Urea cycle; Arginine and Proline Metabolism	-2.44239	0.574821	-4.24896	2.14763e-05	0.195247	0.014969
Hyperlipidemia	272.1	M19503	stearoyl sphingomyelin (d18:1/18:0)	Lipid	Sphingolipid Metabolism	0.474681	0.127462	3.72409	0.000196019	0.404998	0.0151806
Gout	274.1	M01107	allantoin	Nucleotide	Purine Metabolism (Hypo)Xanthine/Inosine containing	2.6887	0.710788	3.7827	0.000155134	0.380944	0.0154469
Adult failure to thrive	260.3	M18467	eicosapentaenoate (EPA; 20:5n3)	Lipid	Polyunsaturated Fatty Acid (n3 and n6)	-1.86976	0.506342	-3.69268	0.000221907	0.417583	0.0155648
Adult failure to thrive	260.3	M36593	2-linoleoyl-GPE (18:2)*	Lipid	Lysolipid	3.54314	0.945541	3.74721	0.000178814	0.38746	0.0155648
Adult failure to thrive	260.3	M36600	1-linoleoyl-GPE (18:2)*	Lipid	Lysolipid	3.27241	0.886574	3.69107	0.000223312	0.417583	0.0155648
Adult failure to thrive	260.3	M52083	X - 24054			4.05717	1.07473	3.77507	0.000159961	0.380944	0.0155648
Adult failure to thrive	260.3	M52452	1-stearoyl-2-linoleoyl-GPC (18:0/18:2)*	Lipid	Phospholipid Metabolism	3.35132	0.885384	3.78516	0.000153611	0.380944	0.0155648
Adult failure to thrive	260.3	M52613	1-(1-enyl-stearoyl)-2-arachidonoyl-GPC (P-18:0/20:4)	Lipid	Plasmalogen	-1.59759	0.405799	-3.93691	8.2537e-05	0.331894	0.0155648
Adult failure to thrive	260.3	M52710	1-linoleoyl-2-arachidonoyl-GPC (18:2/20:4n6)*	Lipid	Phospholipid Metabolism	-2.62063	0.662015	-3.95856	7.54026e-05	0.321769	0.0155648
Adult failure to thrive	260.3	M52737	1-palmitoyl-2-meadoyl-GPC (16:0/20:3n9)*	Lipid	Phospholipid Metabolism	-2.37919	0.618313	-3.84787	0.000119148	0.371016	0.0155648
Adult failure to thrive	260.3	M52738	1-stearoyl-2-meadoyl-GPC (18:0/20:3n9)*	Lipid	Phospholipid Metabolism	-2.37812	0.643148	-3.69762	0.000217633	0.413893	0.0155648
Infection/inflammation of internal prosthetic device; implant; and graft	81	M44563	1-eicosapentaenoyl-GPC (20:5)*	Lipid	Lysolipid	-1.58653	0.405258	-3.91487	9.04537e-05	0.343888	0.0157616
Gout and other crystal arthropathies	274	M01604	urate	Nucleotide	Purine Metabolism (Hypo)Xanthine/Inosine containing	1.14185	0.269758	4.23289	2.30705e-05	0.205279	0.0160802
Urinary tract infection	591	M42450	1-stearoyl-2-arachidonoyl-GPC (18:0/20:4)	Lipid	Phospholipid Metabolism	-0.399261	0.104729	-3.81234	0.00013766	0.373896	0.0163381
Urinary tract infection	591	M52462	1-palmitoyl-2-arachidonoyl-GPC (16:0/20:4)	Lipid	Phospholipid Metabolism	-0.522782	0.136168	-3.83923	0.000123422	0.373896	0.0163381
Urinary tract infection	591	M52719	phosphatidylcholine (16:0/22:5n3 18:1/20:4)*	Lipid	Phospholipid Metabolism	-0.611776	0.160696	-3.80703	0.000140644	0.377034	0.0163381
Urinary tract infection	591	M52720	phosphatidylcholine (18:0/20:5 16:0/22:5n6)*	Lipid	Phospholipid Metabolism	-0.624839	0.153773	-4.06337	4.83692e-05	0.280945	0.0163381
Urinary tract infection	591	M52738	1-stearoyl-2-meadoyl-GPC (18:0/20:3n9)*	Lipid	Phospholipid Metabolism	-1.02354	0.267062	-3.83258	0.000126807	0.373896	0.0163381
Urinary tract infection	591	M19132	1 2-distearoyl-GPC (18:0/18:0)	Lipid	Phospholipid Metabolism	-2.26737	0.607055	-3.73504	0.000187687	0.399015	0.0163522
Urinary tract infection	591	M33228	1-arachidonoyl-GPC (20:4n6)*	Lipid	Lysolipid	-0.436741	0.11602	-3.76437	0.000166971	0.380944	0.0163522
Calculus of kidney	594.1	M33228	1-arachidonoyl-GPC (20:4n6)*	Lipid	Lysolipid	-1.01033	0.239362	-4.22091	2.43315e-05	0.206934	0.016959
Intestinal infection	8	M46598	X - 11438			4.20035	0.996017	4.21715	2.4741e-05	0.206934	0.0172445
Nonrheumatic mitral valve disorders	395.1	M32328	hexanoylcarnitine	Lipid	Fatty Acid Metabolism(Acyl Carnitine)	-0.875417	0.225235	-3.88668	0.000101626	0.353889	0.0177083
Encounter for long-term (current) use of aspirin	457.3	M52720	phosphatidylcholine (18:0/20:5 16:0/22:5n6)*	Lipid	Phospholipid Metabolism	-0.931506	0.243413	-3.82686	0.00012979	0.373896	0.0180927
Gouty arthropathy	274.11	M01604	urate	Nucleotide	Purine Metabolism (Hypo)Xanthine/Inosine containing	1.57153	0.373821	4.20397	2.62276e-05	0.208783	0.0182806
Diarrhea	561.1	M32401	trigonelline (N'-methylnicotinate)	Cofactors and Vitamins	Nicotinate and Nicotinamide Metabolism	-4.89724	1.16664	-4.19774	2.69591e-05	0.208783	0.0187905
Adult failure to thrive	260.3	M42450	1-stearoyl-2-arachidonoyl-GPC (18:0/20:4)	Lipid	Phospholipid Metabolism	-0.905362	0.250329	-3.61669	0.00029839	0.457296	0.0188237
Adult failure to thrive	260.3	M52719	phosphatidylcholine (16:0/22:5n3 18:1/20:4)*	Lipid	Phospholipid Metabolism	-1.41442	0.393413	-3.59525	0.000324081	0.471811	0.0188237
Hypercholesterolemia	272.11	M52612	1-(1-enyl-stearoyl)-2-oleoyl-GPC (P-18:0/18:1)	Lipid	Plasmalogen	1.28629	0.344912	3.72931	0.000192003	0.401477	0.019118
Urinary tract infection	591	M52497	1-pentadecanoyl-2-linoleoyl-GPC (15:0/18:2)*	Lipid	Phospholipid Metabolism	1.60348	0.441532	3.63162	0.000281653	0.44957	0.0196312
Urinary tract infection	591	M52737	1-palmitoyl-2-meadoyl-GPC (16:0/20:3n9)*	Lipid	Phospholipid Metabolism	-0.93636	0.25623	-3.65438	0.000257805	0.440662	0.0196312
Abnormal involuntary movements	350.1	M15772	ribitol	Carbohydrate	Pentose Metabolism	-2.44883	0.584753	-4.18781	2.81659e-05	0.214163	0.0196316
Encounter for long-term (current) use of anticoagulants, antithrombotics, aspirin	457	M33387	2-arachidonoyl-GPC (20:4)*	Lipid	Lysolipid	-1.3071	0.354348	-3.68873	0.000225373	0.417583	0.0196356
Adult failure to thrive	260.3	M52689	1-(1-enyl-palmitoyl)-2-arachidonoyl-GPC (P-16:0/20:4)*	Lipid	Plasmalogen	-1.21691	0.341663	-3.56173	0.000368422	0.477634	0.0197531
Sepsis and SIRS	994	M52716	1-(1-enyl-palmitoyl)-2-palmitoyl-GPC (P-16:0/16:0)*	Lipid	Plasmalogen	-0.999955	0.255059	-3.92049	8.83689e-05	0.340464	0.020531
Methicillin resistant Staphylococcus aureus	41.12	M00060	leucine	Amino Acid	Leucine Isoleucine and Valine Metabolism	-4.9578	1.25189	-3.96025	7.48719e-05	0.321769	0.0206057
Methicillin resistant Staphylococcus aureus	41.12	M52463	1-palmitoyl-2-eicosapentaenoyl-GPC (16:0/20:5)*	Lipid	Phospholipid Metabolism	-2.30768	0.590996	-3.90472	9.43337e-05	0.349118	0.0206057
Methicillin resistant Staphylococcus aureus	41.12	M52719	phosphatidylcholine (16:0/22:5n3 18:1/20:4)*	Lipid	Phospholipid Metabolism	-1.63472	0.424634	-3.84972	0.000118253	0.371016	0.0206057
Methicillin resistant Staphylococcus aureus	41.12	M52738	1-stearoyl-2-meadoyl-GPC (18:0/20:3n9)*	Lipid	Phospholipid Metabolism	-2.66312	0.68861	-3.86738	0.00011001	0.364279	0.0206057
Adult failure to thrive	260.3	M18281	2-hydroxyhippurate (salicylurate)	Xenobiotics	Benzoate Metabolism	21.0086	6.01469	3.49288	0.000477837	0.506418	0.0208158
Adult failure to thrive	260.3	M32504	docosapentaenoate (n3 DPA; 22:5n3)	Lipid	Polyunsaturated Fatty Acid (n3 and n6)	-3.99554	1.14169	-3.49968	0.000465819	0.503373	0.0208158
Adult failure to thrive	260.3	M44563	1-eicosapentaenoyl-GPC (20:5)*	Lipid	Lysolipid	-1.51662	0.432784	-3.50433	0.00045775	0.501515	0.0208158
Encounter for long-term (current) use of anticoagulants, antithrombotics, aspirin	457	M52738	1-stearoyl-2-meadoyl-GPC (18:0/20:3n9)*	Lipid	Phospholipid Metabolism	-2.30539	0.63364	-3.63832	0.000274418	0.448945	0.0212521
Vitamin deficiency	261	M37506	palmitoyl sphingomyelin (d18:1/16:0)	Lipid	Sphingolipid Metabolism	0.785284	0.188661	4.16241	3.14907e-05	0.231042	0.021949
Sarcoidosis	697	M42446	1-palmitoyl-2-linoleoyl-GPC (16:0/18:2)	Lipid	Phospholipid Metabolism	3.06346	0.736768	4.15797	3.21083e-05	0.231512	0.0223795
Adult failure to thrive	260.3	M52462	1-palmitoyl-2-arachidonoyl-GPC (16:0/20:4)	Lipid	Phospholipid Metabolism	-1.13231	0.327752	-3.45479	0.000550727	0.509752	0.0225798
Encounter for long-term (current) use of anticoagulants, antithrombotics, aspirin	457	M52451	1-oleoyl-2-linoleoyl-GPI (18:1/18:2)*	Lipid	Phospholipid Metabolism	2.04932	0.570309	3.59335	0.00032645	0.471811	0.0227535
Disorders of lipoid metabolism	272	M52713	1-(1-enyl-palmitoyl)-2-palmitoleoyl-GPC (P-16:0/16:1)*	Lipid	Plasmalogen	-0.392893	0.108683	-3.61505	0.000300285	0.457296	0.0232554
Fasciitis	728.7	M47031	2-methoxyacetaminophen sulfate*	Xenobiotics	Drug	2.72072	0.673264	4.04109	5.3204e-05	0.293309	0.0234713
Fasciitis	728.7	M47716	X - 12686			3.32809	0.835058	3.98546	6.73496e-05	0.31349	0.0234713
Type 2 diabetes with ophthalmic manifestations	250.23	M46358	X - 12212			-5.71001	1.37752	-4.14513	3.39626e-05	0.237803	0.0236719
Septicemia	38	M52474	1-(1-enyl-palmitoyl)-GPC (P-16:0)*	Lipid	Lysoplasmalogen	-1.73413	0.41846	-4.14408	3.4118e-05	0.237803	0.0237803
Sepsis and SIRS	994	M52613	1-(1-enyl-stearoyl)-2-arachidonoyl-GPC (P-18:0/20:4)	Lipid	Plasmalogen	-1.09305	0.286903	-3.80983	0.000139062	0.375197	0.0242315
Encounter for long-term (current) use of aspirin	457.3	M52463	1-palmitoyl-2-eicosapentaenoyl-GPC (16:0/20:5)*	Lipid	Phospholipid Metabolism	-1.29073	0.348088	-3.70805	0.00020886	0.409627	0.0242625
Methicillin resistant Staphylococcus aureus	41.12	M36593	2-linoleoyl-GPE (18:2)*	Lipid	Lysolipid	3.72811	1.02544	3.63562	0.000277317	0.448945	0.0243828
Methicillin resistant Staphylococcus aureus	41.12	M36600	1-linoleoyl-GPE (18:2)*	Lipid	Lysolipid	3.50332	0.957109	3.66031	0.000251906	0.439384	0.0243828
Methicillin resistant Staphylococcus aureus	41.12	M52452	1-stearoyl-2-linoleoyl-GPC (18:0/18:2)*	Lipid	Phospholipid Metabolism	3.40141	0.958067	3.55029	0.000384808	0.477634	0.0243828
Methicillin resistant Staphylococcus aureus	41.12	M52684	1-palmitoyl-2-linolenoyl-GPC (16:0/18:3)*	Lipid	Phospholipid Metabolism	1.78387	0.502457	3.5503	0.000384793	0.477634	0.0243828
Methicillin resistant Staphylococcus aureus	41.12	M52720	phosphatidylcholine (18:0/20:5 16:0/22:5n6)*	Lipid	Phospholipid Metabolism	-1.46439	0.408513	-3.58469	0.000337477	0.471811	0.0243828
Methicillin resistant Staphylococcus aureus	41.12	M52737	1-palmitoyl-2-meadoyl-GPC (16:0/20:3n9)*	Lipid	Phospholipid Metabolism	-2.45304	0.668844	-3.66758	0.000244853	0.436518	0.0243828
Methicillin resistant Staphylococcus aureus	41.12	M52748	1-(1-enyl-stearoyl)-2-linoleoyl-GPE (P-18:0/18:2)*	Lipid	Plasmalogen	3.18341	0.88238	3.60775	0.00030886	0.464624	0.0243828
Urinary tract infection	591	M33387	2-arachidonoyl-GPC (20:4)*	Lipid	Lysolipid	-0.532003	0.150847	-3.52677	0.000420663	0.492946	0.0244335
Urinary tract infection	591	M49583	X - 23705			-0.759959	0.21446	-3.54359	0.000394717	0.477634	0.0244335
Retention of urine	599.2	M18467	eicosapentaenoate (EPA; 20:5n3)	Lipid	Polyunsaturated Fatty Acid (n3 and n6)	-1.61763	0.407206	-3.9725	7.11208e-05	0.319814	0.0247856
Degeneration of intervertebral disc	722.6	M31943	3-hydroxysebacate	Lipid	Fatty Acid Monohydroxy	-1.12588	0.272344	-4.13404	3.56447e-05	0.237853	0.0248444
Fracture of ankle and foot	801	M47031	2-methoxyacetaminophen sulfate*	Xenobiotics	Drug	2.22127	0.537469	4.13284	3.58315e-05	0.237853	0.0249746
Hyperlipidemia	272.1	M52713	1-(1-enyl-palmitoyl)-2-palmitoleoyl-GPC (P-16:0/16:1)*	Lipid	Plasmalogen	-0.375313	0.105298	-3.56431	0.000364817	0.477634	0.0254277
Hypovolemia	276.5	M01107	allantoin	Nucleotide	Purine Metabolism (Hypo)Xanthine/Inosine containing	-2.11894	0.513303	-4.12805	3.6585e-05	0.23906	0.0254997
Gout and other crystal arthropathies	274	M01107	allantoin	Nucleotide	Purine Metabolism (Hypo)Xanthine/Inosine containing	3.02404	0.763368	3.96145	7.44958e-05	0.321769	0.0259618
Septicemia	38	M52689	1-(1-enyl-palmitoyl)-2-arachidonoyl-GPC (P-16:0/20:4)*	Lipid	Plasmalogen	-0.739684	0.186819	-3.95936	7.51498e-05	0.321769	0.0261897
Encounter for long-term (current) use of anticoagulants, antithrombotics, aspirin	457	M32504	docosapentaenoate (n3 DPA; 22:5n3)	Lipid	Polyunsaturated Fatty Acid (n3 and n6)	-3.94746	1.1257	-3.50665	0.000453777	0.499394	0.0263569
Encounter for long-term (current) use of anticoagulants, antithrombotics, aspirin	457	M52462	1-palmitoyl-2-arachidonoyl-GPC (16:0/20:4)	Lipid	Phospholipid Metabolism	-1.14074	0.324918	-3.51086	0.000446665	0.498779	0.0263569
Urinary tract infection	591	M32504	docosapentaenoate (n3 DPA; 22:5n3)	Lipid	Polyunsaturated Fatty Acid (n3 and n6)	-1.59624	0.469195	-3.40208	0.000668747	0.537809	0.0263588
Urinary tract infection	591	M36600	1-linoleoyl-GPE (18:2)*	Lipid	Lysolipid	1.30525	0.380379	3.43145	0.000600367	0.52354	0.0263588
Urinary tract infection	591	M52613	1-(1-enyl-stearoyl)-2-arachidonoyl-GPC (P-18:0/20:4)	Lipid	Plasmalogen	-0.589694	0.172051	-3.42744	0.000609311	0.52354	0.0263588
Urinary tract infection	591	M52671	X - 24439			0.893077	0.262884	3.39723	0.000680715	0.540269	0.0263588
Urinary tract infection	591	M52698	1-adrenoyl-GPC (22:4)*	Lipid	Lysolipid	-1.10543	0.318701	-3.46854	0.0005233	0.509752	0.0263588
Urinary tract infection	591	M52703	1-stearyl-GPC (O-18:0)*	Lipid	Lyso-phospho-ether	-2.52294	0.738187	-3.41776	0.000631391	0.532329	0.0263588
Hypercholesterolemia	272.11	M33447	palmitoleate (16:1n7)	Lipid	Long Chain Fatty Acid	-1.71263	0.477417	-3.58729	0.000334132	0.471811	0.0265519
Hypercholesterolemia	272.11	M52615	sphingomyelin (d18:1/17:0 d17:1/18:0 d19:1/16:0)	Lipid	Sphingolipid Metabolism	0.761816	0.212764	3.58057	0.000342851	0.471811	0.0265519
Effects radiation NOS	990	M18281	2-hydroxyhippurate (salicylurate)	Xenobiotics	Benzoate Metabolism	21.9305	5.54837	3.95261	7.73045e-05	0.323287	0.0269406
Adult failure to thrive	260.3	M19132	1 2-distearoyl-GPC (18:0/18:0)	Lipid	Phospholipid Metabolism	-4.79525	1.42614	-3.3624	0.000772691	0.550288	0.0281516
Adult failure to thrive	260.3	M33387	2-arachidonoyl-GPC (20:4)*	Lipid	Lysolipid	-1.20859	0.361188	-3.34614	0.000819437	0.557436	0.0281516
Adult failure to thrive	260.3	M52453	1-oleoyl-2-linoleoyl-GPC (18:1/18:2)*	Lipid	Phospholipid Metabolism	1.92236	0.57615	3.33657	0.000848183	0.559891	0.0281516
Adult failure to thrive	260.3	M52463	1-palmitoyl-2-eicosapentaenoyl-GPC (16:0/20:5)*	Lipid	Phospholipid Metabolism	-1.83798	0.546121	-3.36552	0.000763982	0.54979	0.0281516
Disorders of lipoid metabolism	272	M52435	sphingomyelin (d18:2/23:0 d18:1/23:1 d17:1/24:1)*	Lipid	Sphingolipid Metabolism	0.737652	0.210206	3.50919	0.000449472	0.498779	0.0286892
Disorders of lipoid metabolism	272	M53010	lactosyl-N-palmitoyl-sphingosine	Lipid	Sphingolipid Metabolism	0.454413	0.129564	3.50725	0.000452771	0.499394	0.0286892
Fever of unknown origin	783	M52689	1-(1-enyl-palmitoyl)-2-arachidonoyl-GPC (P-16:0/20:4)*	Lipid	Plasmalogen	-0.588541	0.143528	-4.10054	4.1219e-05	0.253497	0.0287296
Encounter for long-term (current) use of anticoagulants, antithrombotics, aspirin	457	M36593	2-linoleoyl-GPE (18:2)*	Lipid	Lysolipid	3.2248	0.935708	3.44637	0.000568174	0.513198	0.0290639
Encounter for long-term (current) use of anticoagulants, antithrombotics, aspirin	457	M52613	1-(1-enyl-stearoyl)-2-arachidonoyl-GPC (P-18:0/20:4)	Lipid	Plasmalogen	-1.39038	0.404292	-3.43904	0.00058378	0.516454	0.0290639
Gouty arthropathy	274.11	M01107	allantoin	Nucleotide	Purine Metabolism (Hypo)Xanthine/Inosine containing	4.16826	1.05978	3.93314	8.38436e-05	0.333937	0.0292195
Septicemia	38	M52720	phosphatidylcholine (18:0/20:5 16:0/22:5n6)*	Lipid	Phospholipid Metabolism	-0.788154	0.205565	-3.83408	0.000126033	0.373896	0.0292817
Secondary malignancy of respiratory organs	198.2	M47642	X - 12101			-2.40197	0.587113	-4.09116	4.29225e-05	0.260147	0.029917
Adult failure to thrive	260.3	M52720	phosphatidylcholine (18:0/20:5 16:0/22:5n6)*	Lipid	Phospholipid Metabolism	-1.25859	0.380643	-3.30649	0.000944742	0.571079	0.0299311
Cyst of kidney, acquired	586.2	M46455	X - 21410			0.908807	0.230264	3.94681	7.92004e-05	0.324722	0.0306201
Cyst of kidney, acquired	586.2	M46742	X - 21668			1.02561	0.261511	3.92188	8.78624e-05	0.340464	0.0306201
Pulmonary congestion and hypostasis	503	M00060	leucine	Amino Acid	Leucine Isoleucine and Valine Metabolism	-4.35592	1.06794	-4.07881	4.52669e-05	0.267717	0.031551
Methicillin resistant Staphylococcus aureus	41.12	M19132	1 2-distearoyl-GPC (18:0/18:0)	Lipid	Phospholipid Metabolism	-5.31942	1.5385	-3.45754	0.000545131	0.509752	0.0316631
Adult failure to thrive	260.3	M49583	X - 23705			-1.68226	0.513928	-3.27334	0.00106286	0.586097	0.0322092
Adult failure to thrive	260.3	M01110	arachidonate (20:4n6)	Lipid	Polyunsaturated Fatty Acid (n3 and n6)	-1.32437	0.406607	-3.25712	0.00112548	0.58908	0.0326857
Encounter for long-term (current) use of anticoagulants, antithrombotics, aspirin	457	M19132	1 2-distearoyl-GPC (18:0/18:0)	Lipid	Phospholipid Metabolism	-4.76817	1.41552	-3.36849	0.000755813	0.549772	0.0329251
Encounter for long-term (current) use of anticoagulants, antithrombotics, aspirin	457	M42450	1-stearoyl-2-arachidonoyl-GPC (18:0/20:4)	Lipid	Phospholipid Metabolism	-0.831924	0.246416	-3.37609	0.000735237	0.547743	0.0329251
Encounter for long-term (current) use of anticoagulants, antithrombotics, aspirin	457	M52687	1-oleoyl-2-linoleoyl-GPE (18:1/18:2)*	Lipid	Phospholipid Metabolism	1.34986	0.403097	3.34871	0.000811898	0.557436	0.0332878
Sarcoidosis	697	M36593	2-linoleoyl-GPE (18:2)*	Lipid	Lysolipid	4.56681	1.17068	3.901	9.57973e-05	0.349508	0.0333854
Encounter for long-term (current) use of aspirin	457.3	M52452	1-stearoyl-2-linoleoyl-GPC (18:0/18:2)*	Lipid	Phospholipid Metabolism	2.07673	0.579697	3.58244	0.000340396	0.471811	0.0338937
Encounter for long-term (current) use of aspirin	457.3	M01110	arachidonate (20:4n6)	Lipid	Polyunsaturated Fatty Acid (n3 and n6)	-0.942397	0.265706	-3.54677	0.000389984	0.477634	0.0339774
Encounter for long-term (current) use of anticoagulants, antithrombotics, aspirin	457	M52497	1-pentadecanoyl-2-linoleoyl-GPC (15:0/18:2)*	Lipid	Phospholipid Metabolism	3.51764	1.05731	3.32698	0.000877912	0.56053	0.0339947
Sepsis and SIRS	994	M52715	1-(1-enyl-palmitoyl)-2-myristoyl-GPC (P-16:0/14:0)*	Lipid	Plasmalogen	-1.59779	0.435697	-3.6672	0.000245217	0.436518	0.0341833
Fever of unknown origin	783	M52738	1-stearoyl-2-meadoyl-GPC (18:0/20:3n9)*	Lipid	Phospholipid Metabolism	-1.07108	0.275014	-3.89464	9.83464e-05	0.351525	0.0342737
Encounter for long-term (current) use of anticoagulants, antithrombotics, aspirin	457	M49583	X - 23705			-1.67874	0.508003	-3.3046	0.000951134	0.571498	0.0347083
Encounter for long-term (current) use of anticoagulants, antithrombotics, aspirin	457	M52677	1-(1-enyl-palmitoyl)-2-linoleoyl-GPE (P-16:0/18:2)*	Lipid	Plasmalogen	1.90331	0.579753	3.28297	0.00102719	0.579647	0.0347083
Encounter for long-term (current) use of anticoagulants, antithrombotics, aspirin	457	M52698	1-adrenoyl-GPC (22:4)*	Lipid	Lysolipid	-2.4579	0.750933	-3.27312	0.00106366	0.586097	0.0347083
Encounter for long-term (current) use of anticoagulants, antithrombotics, aspirin	457	M52710	1-linoleoyl-2-arachidonoyl-GPC (18:2/20:4n6)*	Lipid	Phospholipid Metabolism	-2.13697	0.654556	-3.26477	0.00109553	0.586097	0.0347083
Septicemia	38	M33228	1-arachidonoyl-GPC (20:4n6)*	Lipid	Lysolipid	-0.574455	0.154457	-3.71919	0.00019986	0.404998	0.0348256
Asthma with exacerbation	495.2	M42095	palmitic amide	Lipid	Fatty Acid Amide	-8.60157	2.12164	-4.0542	5.03063e-05	0.288193	0.0350635
Calculus of kidney	594.1	M52462	1-palmitoyl-2-arachidonoyl-GPC (16:0/20:4)	Lipid	Phospholipid Metabolism	-1.0836	0.278672	-3.88846	0.000100883	0.353889	0.0351576
Methicillin resistant Staphylococcus aureus	41.12	M01110	arachidonate (20:4n6)	Lipid	Polyunsaturated Fatty Acid (n3 and n6)	-1.47154	0.442011	-3.3292	0.000870956	0.56053	0.0352166
Methicillin resistant Staphylococcus aureus	41.12	M18467	eicosapentaenoate (EPA; 20:5n3)	Lipid	Polyunsaturated Fatty Acid (n3 and n6)	-1.83154	0.556286	-3.29244	0.000993231	0.577744	0.0352166
Methicillin resistant Staphylococcus aureus	41.12	M32504	docosapentaenoate (n3 DPA; 22:5n3)	Lipid	Polyunsaturated Fatty Acid (n3 and n6)	-4.14258	1.24139	-3.33705	0.000846731	0.559891	0.0352166
Methicillin resistant Staphylococcus aureus	41.12	M33387	2-arachidonoyl-GPC (20:4)*	Lipid	Lysolipid	-1.32624	0.392403	-3.37979	0.000725424	0.547743	0.0352166
Methicillin resistant Staphylococcus aureus	41.12	M49583	X - 23705			-1.84172	0.557967	-3.30077	0.000964186	0.571947	0.0352166
Methicillin resistant Staphylococcus aureus	41.12	M52453	1-oleoyl-2-linoleoyl-GPC (18:1/18:2)*	Lipid	Phospholipid Metabolism	2.10858	0.623379	3.3825	0.000718287	0.547743	0.0352166
Methicillin resistant Staphylococcus aureus	41.12	M52474	1-(1-enyl-palmitoyl)-GPC (P-16:0)*	Lipid	Lysoplasmalogen	-2.77452	0.84394	-3.28758	0.00101052	0.578903	0.0352166
Methicillin resistant Staphylococcus aureus	41.12	M52603	1 2-dilinoleoyl-GPC (18:2/18:2)	Lipid	Phospholipid Metabolism	2.09178	0.622002	3.36298	0.000771047	0.550288	0.0352166
Urinary tract infection	591	M52452	1-stearoyl-2-linoleoyl-GPC (18:0/18:2)*	Lipid	Phospholipid Metabolism	1.20925	0.366851	3.2963	0.000979668	0.575113	0.0359384
Hyperlipidemia	272.1	M33447	palmitoleate (16:1n7)	Lipid	Long Chain Fatty Acid	-1.02163	0.296411	-3.44666	0.000567568	0.513198	0.0359632
Urinary tract infection	591	M33969	stearidonate (18:4n3)	Lipid	Polyunsaturated Fatty Acid (n3 and n6)	-1.02044	0.311933	-3.27134	0.00107041	0.586097	0.0361078
Urinary tract infection	591	M46325	1-arachidonoyl-GPA (20:4)	Lipid	Lysolipid	-0.552813	0.169224	-3.26675	0.0010879	0.586097	0.0361078
Inflammatory and toxic neuropathy	357	M00554	adenine	Nucleotide	Purine Metabolism Adenine containing	-4.58231	1.13284	-4.04496	5.23317e-05	0.293309	0.0364752
Methicillin resistant Staphylococcus aureus	41.12	M33228	1-arachidonoyl-GPC (20:4n6)*	Lipid	Lysolipid	-1.00621	0.30832	-3.26353	0.00110032	0.587683	0.0365203
Methicillin resistant Staphylococcus aureus	41.12	M52613	1-(1-enyl-stearoyl)-2-arachidonoyl-GPC (P-18:0/20:4)	Lipid	Plasmalogen	-1.46259	0.450256	-3.24835	0.00116075	0.591079	0.0367747
Hypercholesterolemia	272.11	M52683	1-palmitoleoyl-2-linoleoyl-GPC (16:1/18:2)*	Lipid	Phospholipid Metabolism	-1.00826	0.290997	-3.46484	0.00053054	0.509752	0.0369787
Cardiogenic shock	797.1	M18245	gamma-glutamylhistidine	Peptide	Gamma-glutamyl Amino Acid	3.90833	1.00861	3.87498	0.000106633	0.36215	0.0371618
Urinary calculus	594	M33228	1-arachidonoyl-GPC (20:4n6)*	Lipid	Lysolipid	-0.941572	0.233193	-4.03774	5.39685e-05	0.293309	0.0376161
Mixed hyperlipidemia	272.13	M52616	1-palmitoyl-2-stearoyl-GPC (16:0/18:0)	Lipid	Phospholipid Metabolism	0.945049	0.26287	3.59511	0.000324251	0.471811	0.0376671
Diffuse diseases of connective tissue	709	M22176	cysteine s-sulfate	Amino Acid	Methionine Cysteine SAM and Taurine Metabolism	-4.07881	1.01042	-4.03674	5.41991e-05	0.293309	0.0377768
Adult failure to thrive	260.3	M52684	1-palmitoyl-2-linolenoyl-GPC (16:0/18:3)*	Lipid	Phospholipid Metabolism	1.49651	0.467225	3.20297	0.0013602	0.598145	0.0379224
Acne	706.1	M46898	X - 21729			5.52797	1.37016	4.03455	5.47061e-05	0.293309	0.0381302
Fracture of lower limb	800	M47031	2-methoxyacetaminophen sulfate*	Xenobiotics	Drug	2.10199	0.522046	4.02644	5.66272e-05	0.294778	0.0394692
Other disorders of arteries and arterioles	447	M46260	X - 11564			3.52763	0.9145	3.85744	0.000114579	0.366712	0.0399306
Fever of unknown origin	783	M52462	1-palmitoyl-2-arachidonoyl-GPC (16:0/20:4)	Lipid	Phospholipid Metabolism	-0.523127	0.140641	-3.7196	0.000199542	0.404998	0.040322
Fever of unknown origin	783	M52463	1-palmitoyl-2-eicosapentaenoyl-GPC (16:0/20:5)*	Lipid	Phospholipid Metabolism	-0.826391	0.225149	-3.67041	0.000242157	0.436518	0.040322
Fever of unknown origin	783	M52716	1-(1-enyl-palmitoyl)-2-palmitoyl-GPC (P-16:0/16:0)*	Lipid	Plasmalogen	-0.556987	0.154901	-3.59576	0.000323448	0.471811	0.040322
Fever of unknown origin	783	M52719	phosphatidylcholine (16:0/22:5n3 18:1/20:4)*	Lipid	Phospholipid Metabolism	-0.592206	0.165544	-3.57734	0.000347105	0.472831	0.040322
Acute renal failure	585.1	M52451	1-oleoyl-2-linoleoyl-GPI (18:1/18:2)*	Lipid	Phospholipid Metabolism	0.936901	0.233004	4.02097	5.79592e-05	0.294778	0.0403976
Fever of unknown origin	783	M36600	1-linoleoyl-GPE (18:2)*	Lipid	Lysolipid	1.3694	0.391255	3.50001	0.000465247	0.503373	0.0407485
Fever of unknown origin	783	M52748	1-(1-enyl-stearoyl)-2-linoleoyl-GPE (P-18:0/18:2)*	Lipid	Plasmalogen	1.23512	0.353031	3.4986	0.000467702	0.504105	0.0407485
Other and unspecified congenital anomalies	759	M48428	pyrraline	Xenobiotics	Food Component/Plant	-7.19217	1.78965	-4.01876	5.85045e-05	0.294778	0.0407777
Encounter for long-term (current) use of aspirin	457.3	M42450	1-stearoyl-2-arachidonoyl-GPC (18:0/20:4)	Lipid	Phospholipid Metabolism	-0.557546	0.164846	-3.38221	0.000719039	0.547743	0.0408059
Encounter for long-term (current) use of aspirin	457.3	M52453	1-oleoyl-2-linoleoyl-GPC (18:1/18:2)*	Lipid	Phospholipid Metabolism	1.30016	0.377554	3.44362	0.000573974	0.515099	0.0408059
Encounter for long-term (current) use of aspirin	457.3	M52462	1-palmitoyl-2-arachidonoyl-GPC (16:0/20:4)	Lipid	Phospholipid Metabolism	-0.731754	0.216537	-3.37935	0.000726564	0.547743	0.0408059
Encounter for long-term (current) use of aspirin	457.3	M52738	1-stearoyl-2-meadoyl-GPC (18:0/20:3n9)*	Lipid	Phospholipid Metabolism	-1.45028	0.422868	-3.42962	0.00060442	0.52354	0.0408059
Encounter for long-term (current) use of aspirin	457.3	M52748	1-(1-enyl-stearoyl)-2-linoleoyl-GPE (P-18:0/18:2)*	Lipid	Plasmalogen	1.82951	0.543433	3.36657	0.000761085	0.54979	0.0408059
Fever of unknown origin	783	M52720	phosphatidylcholine (18:0/20:5 16:0/22:5n6)*	Lipid	Phospholipid Metabolism	-0.552351	0.159519	-3.46261	0.000534964	0.509752	0.04143
Urinary tract infection	591	M34397	1-arachidonylglycerol (20:4)	Lipid	Monoacylglycerol	-0.93388	0.291046	-3.2087	0.00133338	0.594233	0.0415042
Urinary tract infection	591	M42459	sphingomyelin (d18:2/16:0 d18:1/16:1)*	Lipid	Sphingolipid Metabolism	-2.11208	0.664283	-3.17949	0.00147535	0.601172	0.0415042
Urinary tract infection	591	M44563	1-eicosapentaenoyl-GPC (20:5)*	Lipid	Lysolipid	-0.547782	0.172428	-3.17688	0.00148867	0.601172	0.0415042
Urinary tract infection	591	M52463	1-palmitoyl-2-eicosapentaenoyl-GPC (16:0/20:5)*	Lipid	Phospholipid Metabolism	-0.69514	0.218276	-3.18468	0.00144913	0.601172	0.0415042
Epistaxis or throat hemorrhage	477	M15990	glycerophosphorylcholine (GPC)	Lipid	Phospholipid Metabolism	4.75049	1.18448	4.01061	6.0562e-05	0.301512	0.0422117
Encounter for long-term (current) use of anticoagulants, antithrombotics, aspirin	457	M52453	1-oleoyl-2-linoleoyl-GPC (18:1/18:2)*	Lipid	Phospholipid Metabolism	1.81519	0.56861	3.19232	0.00141135	0.601172	0.0427701
Fracture of lower limb	800	M12032	4-acetamidophenol	Xenobiotics	Drug	1.87869	0.489319	3.83939	0.000123342	0.373896	0.0429846
Urinary tract infection	591	M52083	X - 24054			1.43156	0.453796	3.15464	0.00160694	0.608902	0.0430783
Encounter for long-term (current) use of anticoagulants, antithrombotics, aspirin	457	M36600	1-linoleoyl-GPE (18:2)*	Lipid	Lysolipid	2.83193	0.891599	3.17623	0.00149201	0.601172	0.0433305
Hypovolemia	276.5	M01604	urate	Nucleotide	Purine Metabolism (Hypo)Xanthine/Inosine containing	-0.696905	0.181735	-3.83474	0.000125698	0.373896	0.0438058
Visual disturbances	368	M46799	1-oleoyl-3-linoleoyl-glycerol (18:1/18:2)	Lipid	Diacylglycerol	1.91065	0.477496	4.0014	6.2969e-05	0.309807	0.0438894
Septicemia	38	M52613	1-(1-enyl-stearoyl)-2-arachidonoyl-GPC (P-18:0/20:4)	Lipid	Plasmalogen	-0.812763	0.22872	-3.55352	0.000380109	0.477634	0.044156
Septicemia	38	M52707	1-myristoyl-2-linoleoyl-GPC (14:0/18:2)*	Lipid	Phospholipid Metabolism	1.53401	0.426417	3.59745	0.000321356	0.471811	0.044156
Urinary tract infection	591	M52718	1-palmityl-2-arachidonoyl-GPC (O-16:0/20:4)*	Lipid	Phospholipid Metabolism	-0.559169	0.178374	-3.13481	0.00171964	0.6231	0.0443922
Mixed hyperlipidemia	272.13	M52615	sphingomyelin (d18:1/17:0 d17:1/18:0 d19:1/16:0)	Lipid	Sphingolipid Metabolism	0.561728	0.160068	3.50931	0.000449278	0.498779	0.0447352
Type 2 diabetes with ophthalmic manifestations	250.23	M32401	trigonelline (N'-methylnicotinate)	Cofactors and Vitamins	Nicotinate and Nicotinamide Metabolism	-5.31647	1.38861	-3.82862	0.000128864	0.373896	0.0449091
Solitary pulmonary nodule	514.2	M46662	X - 15492			-2.40255	0.601603	-3.99358	6.5082e-05	0.31349	0.0453622
Infection/inflammation of internal prosthetic device; implant; and graft	81	M52748	1-(1-enyl-stearoyl)-2-linoleoyl-GPE (P-18:0/18:2)*	Lipid	Plasmalogen	2.79469	0.77827	3.5909	0.000329542	0.471811	0.0459382
Methicillin resistant Staphylococcus aureus	41.12	M44563	1-eicosapentaenoyl-GPC (20:5)*	Lipid	Lysolipid	-1.4629	0.463494	-3.15624	0.00159816	0.608699	0.0464133
Methicillin resistant Staphylococcus aureus	41.12	M52703	1-stearyl-GPC (O-18:0)*	Lipid	Lyso-phospho-ether	-6.00751	1.89899	-3.16353	0.00155869	0.603559	0.0464133
Hypercholesterolemia	272.11	M19503	stearoyl sphingomyelin (d18:1/18:0)	Lipid	Sphingolipid Metabolism	0.677564	0.200687	3.37622	0.000734902	0.547743	0.0465661
Fever of unknown origin	783	M42450	1-stearoyl-2-arachidonoyl-GPC (18:0/20:4)	Lipid	Phospholipid Metabolism	-0.367343	0.107974	-3.40215	0.000668571	0.537809	0.0465994
Urinary tract infection	591	M52716	1-(1-enyl-palmitoyl)-2-palmitoyl-GPC (P-16:0/16:0)*	Lipid	Plasmalogen	-0.46988	0.151112	-3.10948	0.00187416	0.6231	0.0466531
Fever of unknown origin	783	M52474	1-(1-enyl-palmitoyl)-GPC (P-16:0)*	Lipid	Lysoplasmalogen	-1.09149	0.323359	-3.37546	0.000736928	0.547743	0.0466944
Cardiac dysrhythmias	427	M21133	4-hydroxybenzoate	Xenobiotics	Benzoate Metabolism	-0.105591	0.0264905	-3.98601	6.7195e-05	0.31349	0.0468349
Adult failure to thrive	260.3	M52698	1-adrenoyl-GPC (22:4)*	Lipid	Lysolipid	-2.41994	0.774658	-3.12388	0.0017848	0.6231	0.0469562
Adult failure to thrive	260.3	M52707	1-myristoyl-2-linoleoyl-GPC (14:0/18:2)*	Lipid	Phospholipid Metabolism	2.47486	0.793656	3.1183	0.00181896	0.6231	0.0469562
Septicemia	38	M52462	1-palmitoyl-2-arachidonoyl-GPC (16:0/20:4)	Lipid	Phospholipid Metabolism	-0.636419	0.182387	-3.48939	0.000484123	0.506418	0.0472856
Septicemia	38	M52738	1-stearoyl-2-meadoyl-GPC (18:0/20:3n9)*	Lipid	Phospholipid Metabolism	-1.23128	0.355992	-3.45873	0.000542733	0.509752	0.0472856
Methicillin resistant Staphylococcus aureus	41.12	M36776	7-alpha-hydroxy-3-oxo-4-cholestenoate (7-Hoca)	Lipid	Sterol	-3.59801	1.17102	-3.07255	0.00212235	0.637621	0.047362
Methicillin resistant Staphylococcus aureus	41.12	M37231	1-docosapentaenoyl-GPC (22:5n3)*	Lipid	Lysolipid	-1.94127	0.632112	-3.07108	0.00213287	0.638092	0.047362
Methicillin resistant Staphylococcus aureus	41.12	M42450	1-stearoyl-2-arachidonoyl-GPC (18:0/20:4)	Lipid	Phospholipid Metabolism	-0.846298	0.275031	-3.0771	0.00209022	0.634493	0.047362
Methicillin resistant Staphylococcus aureus	41.12	M52497	1-pentadecanoyl-2-linoleoyl-GPC (15:0/18:2)*	Lipid	Phospholipid Metabolism	3.58272	1.1688	3.06531	0.00217444	0.638588	0.047362
Methicillin resistant Staphylococcus aureus	41.12	M52630	1-(1-enyl-palmitoyl)-2-docosahexaenoyl-GPC (P-16:0/22:6)*	Lipid	Plasmalogen	-2.63037	0.847428	-3.10394	0.0019096	0.623413	0.047362
Methicillin resistant Staphylococcus aureus	41.12	M52698	1-adrenoyl-GPC (22:4)*	Lipid	Lysolipid	-2.57398	0.832571	-3.09161	0.00199076	0.629342	0.047362
Methicillin resistant Staphylococcus aureus	41.12	M52700	1-stearoyl-2-docosapentaenoyl-GPC (18:0/22:5n6)*	Lipid	Phospholipid Metabolism	-1.87561	0.598511	-3.13379	0.00172567	0.6231	0.047362
Methicillin resistant Staphylococcus aureus	41.12	M52710	1-linoleoyl-2-arachidonoyl-GPC (18:2/20:4n6)*	Lipid	Phospholipid Metabolism	-2.26829	0.729013	-3.11146	0.00186168	0.6231	0.047362
Renal failure NOS	585.2	M34445	sphingosine 1-phosphate	Lipid	Sphingolipid Metabolism	-2.09247	0.583826	-3.58407	0.000338281	0.471811	0.0475139
Renal failure NOS	585.2	M42459	sphingomyelin (d18:2/16:0 d18:1/16:1)*	Lipid	Sphingolipid Metabolism	-4.91928	1.29588	-3.79611	0.000146987	0.378384	0.0475139
Renal failure NOS	585.2	M52463	1-palmitoyl-2-eicosapentaenoyl-GPC (16:0/20:5)*	Lipid	Phospholipid Metabolism	-1.71125	0.451879	-3.78697	0.000152494	0.380944	0.0475139
Renal failure NOS	585.2	M52703	1-stearyl-GPC (O-18:0)*	Lipid	Lyso-phospho-ether	-5.22922	1.45982	-3.5821	0.000340846	0.471811	0.0475139
Renal failure NOS	585.2	M52738	1-stearoyl-2-meadoyl-GPC (18:0/20:3n9)*	Lipid	Phospholipid Metabolism	-1.93603	0.535792	-3.6134	0.000302206	0.457296	0.0475139
Disorders of lipoid metabolism	272	M52683	1-palmitoleoyl-2-linoleoyl-GPC (16:1/18:2)*	Lipid	Phospholipid Metabolism	-0.631422	0.188846	-3.34359	0.000827018	0.557837	0.048036
Anemia of chronic disease	285.2	M34409	stearoylcarnitine	Lipid	Fatty Acid Metabolism(Acyl Carnitine)	-0.834363	0.209663	-3.97954	6.90476e-05	0.317315	0.0481262
Fever of unknown origin	783	M52737	1-palmitoyl-2-meadoyl-GPC (16:0/20:3n9)*	Lipid	Phospholipid Metabolism	-0.88349	0.264726	-3.33738	0.000845727	0.559891	0.0491226
Secondary malignancy of respiratory organs	198.2	M32198	acetylcarnitine	Lipid	Fatty Acid Metabolism(Acyl Carnitine)	-1.33573	0.351005	-3.80543	0.000141556	0.377062	0.0493323
Adult failure to thrive	260.3	M42446	1-palmitoyl-2-linoleoyl-GPC (16:0/18:2)	Lipid	Phospholipid Metabolism	1.90484	0.618003	3.08225	0.00205441	0.634493	0.0495505
Adult failure to thrive	260.3	M52603	1 2-dilinoleoyl-GPC (18:2/18:2)	Lipid	Phospholipid Metabolism	1.77252	0.575269	3.08121	0.00206164	0.634493	0.0495505

## Sheet: ST3
Supplemental table 3: Inverse-variance weighted association (IVWA), MR-Egger and weighted median Mendelian randomization results for the association between metabolites and BioVU phenotypes in European ancestry. Associations shaded in grey were not taken forward for validation due to 1) fewer than 3 SNPs in genetic instrument, or 2) significant heterogeneity.
Phenotype	Phenotype.codes	Metabolite ID1	Metabolite ID2	Metabolite biochemical name	Super pathway	Sub pathway	SNP number	Estimate	Standard Error	Lower CI	Upper CI	P-value	Heterogeneity P-Value	FDR P-value
Disorders of bilirubin excretion	277.4	M43807	C1090	bilirubin (Z,Z)	Cofactors_and_Vitamins	Hemoglobin and Porphyrin Metabolism	34	0.524054	0.115804	0.297083	0.751025	6.03e-06	0.0552574	0.00439905
Cholelithiasis and cholecystitis	574	M43807	C1090	bilirubin (Z,Z)	Cofactors_and_Vitamins	Hemoglobin and Porphyrin Metabolism	34	0.144993	0.038854	0.0688405	0.221145	0.000190164	0.0238287	0.0467012
Other mental disorder	306	M32599	C100001989	glycocholenate sulfate*	Lipid	Secondary Bile Acid Metabolism	32	-0.0737635	0.0185512	-0.110123	-0.0374038	7e-05	0.340687	0.0251284
Disorders of bilirubin excretion	277.4	M02137	C250	biliverdin	Cofactors_and_Vitamins	Hemoglobin and Porphyrin Metabolism	30	0.609096	0.124972	0.364155	0.854038	1.09e-06	0.0288692	0.000937239
Cholelithiasis and cholecystitis	574	M02137	C250	biliverdin	Cofactors_and_Vitamins	Hemoglobin and Porphyrin Metabolism	30	0.157696	0.0423055	0.0747787	0.240613	0.000193349	0.0109294	0.0467012
Disorders of bilirubin excretion	277.4	M46603	C999911530	X - 11530	Uncharacterized	Uncharacterized	29	0.567898	0.146196	0.28136	0.854437	0.00010254	0.0025734	0.0321975
Disorders of bilirubin excretion	277.4	M46517	C999916946	X - 16946	Uncharacterized	Uncharacterized	28	0.603673	0.136035	0.337049	0.870298	9.1e-06	0.0190685	0.00590921
Disorders of bilirubin excretion	277.4	M46493	C999921448	X - 21448	Uncharacterized	Uncharacterized	28	0.562363	0.145565	0.277061	0.847665	0.000111861	0.00458016	0.0339913
Cholecystitis without cholelithiasis	574.3	M32586	C100001950	bilirubin (E,E)*	Cofactors_and_Vitamins	Hemoglobin and Porphyrin Metabolism	23	0.274497	0.0739087	0.129639	0.419356	0.000204005	0.909873	0.0486513
Cholelithiasis and cholecystitis	574	M32586	C100001950	bilirubin (E,E)*	Cofactors_and_Vitamins	Hemoglobin and Porphyrin Metabolism	23	0.185273	0.0420792	0.1028	0.267747	1.07e-05	0.18286	0.00619877
Disorders of bilirubin excretion	277.4	M32586	C100001950	bilirubin (E,E)*	Cofactors_and_Vitamins	Hemoglobin and Porphyrin Metabolism	23	0.708986	0.144553	0.425668	0.992304	9.36e-07	0.0421496	0.000830373
Diverticulitis	562.2	M35678	C100001614	hexadecanedioate (C16-DC)	Lipid	Fatty Acid Dicarboxylate	20	0.274899	0.069108	0.13945	0.410348	6.96e-05	0.829077	0.0251284
Foreign body injury	1001	M15745	C2051	methylsuccinate	Amino_Acid	Leucine Isoleucine and Valine Metabolism	20	-0.712349	0.175873	-1.05705	-0.367644	5.11e-05	0.730244	0.0190988
Alzheimer's disease	290.11	M15745	C2051	methylsuccinate	Amino_Acid	Leucine Isoleucine and Valine Metabolism	20	-0.389418	0.0899555	-0.565727	-0.213108	1.5e-05	0.466033	0.00773142
Gingivitis	523.1	M52865	C999924544	X - 24544	Uncharacterized	Uncharacterized	18	0.326801	0.082712	0.164688	0.488913	7.78e-05	0.855227	0.027145
Corneal opacity and other disorders of cornea	364	M32562	C100001993	pregnenediol disulfate (C21H34O8S2)*	Lipid	Steroid	14	-0.424506	0.112408	-0.644821	-0.204191	0.000159054	0.827252	0.0417852
Jaundice (not of newborn)	573.5	M52975	C100006642	glycodeoxycholate 3-sulfate	Lipid	Secondary Bile Acid Metabolism	14	0.402481	0.0897465	0.226581	0.578381	7.3e-06	0.657904	0.00519244
Nonrheumatic aortic valve disorders	395.2	M52466	C100008992	1-stearoyl-2-docosahexaenoyl-GPE (18:0/22:6)*	Lipid	Phospholipid Metabolism	14	0.1774	0.0449559	0.089288	0.265512	7.94e-05	0.642744	0.0274611
Jaundice (not of newborn)	573.5	M32807	C100001990	taurocholenate sulfate*	Lipid	Secondary Bile Acid Metabolism	14	0.444719	0.10872	0.231632	0.657805	4.3e-05	0.487808	0.0170722
Shock	797	M52689	C100009014	1-(1-enyl-palmitoyl)-2-arachidonoyl-GPC (P-16:0/20:4)*	Lipid	Plasmalogen	12	-0.268794	0.0675872	-0.401263	-0.136326	6.98e-05	0.692425	0.0251284
Nausea and vomiting	789	M52689	C100009014	1-(1-enyl-palmitoyl)-2-arachidonoyl-GPC (P-16:0/20:4)*	Lipid	Plasmalogen	12	-0.118955	0.029312	-0.176405	-0.0615047	4.94e-05	0.520801	0.0190988
Complications of surgical and medical procedures	1011	M37207	C100002026	androstenediol (3alpha, 17alpha) monosulfate (2)	Lipid	Steroid	12	0.377978	0.0963456	0.189144	0.566812	8.74e-05	0.495892	0.0288885
Cholecystitis without cholelithiasis	574.3	M46972	C999921796	X - 21796	Uncharacterized	Uncharacterized	11	0.49747	0.133731	0.235362	0.759579	0.000199281	0.645687	0.0478274
Cholelithiasis and cholecystitis	574	M46972	C999921796	X - 21796	Uncharacterized	Uncharacterized	11	0.359426	0.0817236	0.19925	0.519601	1.09e-05	0.145174	0.00619877
Lung transplant	510.2	M46707	C999917653	X - 17653	Uncharacterized	Uncharacterized	10	-0.927623	0.238662	-1.39539	-0.459855	0.000101587	0.487495	0.0321664
Nausea and vomiting	789	M52613	C100008918	1-(1-enyl-stearoyl)-2-arachidonoyl-GPC (P-18:0/20:4)	Lipid	Plasmalogen	8	-0.155064	0.0351029	-0.223864	-0.0862632	9.99e-06	0.930973	0.0061705
Mixed hyperlipidemia	272.13	M33997	C100001269	campesterol	Lipid	Sterol	8	0.183663	0.0365654	0.111996	0.25533	5.09e-07	0.783329	0.000504792
Disorders of lipoid metabolism	272	M33997	C100001269	campesterol	Lipid	Sterol	8	0.189042	0.03002	0.130204	0.24788	3.03e-10	0.70128	6.01e-07
Corneal opacity and other disorders of cornea	364	M37202	C100001992	androstenediol (3beta,17beta) disulfate (1)	Lipid	Steroid	8	-0.611047	0.154336	-0.913539	-0.308554	7.52e-05	0.670456	0.0267313
\Other chronic ischemic heart disease, unspecified\	411.8	M33997	C100001269	campesterol	Lipid	Sterol	8	0.227464	0.0561359	0.117439	0.337488	5.08e-05	0.632488	0.0190988
Myocardial infarction	411.2	M33997	C100001269	campesterol	Lipid	Sterol	8	0.229435	0.0514728	0.128551	0.33032	8.3e-06	0.591916	0.00558169
Decreased white blood cell count	288.1	M52719	C100009166	phosphatidylcholine (16:0/22:5n3, 18:1/20:4)*	Lipid	Phospholipid Metabolism	8	-0.276688	0.0746646	-0.423028	-0.130348	0.00021077	0.494046	0.0499485
Inflammatory bowel disease and other gastroenteritis and colitis	555	M52719	C100009166	phosphatidylcholine (16:0/22:5n3, 18:1/20:4)*	Lipid	Phospholipid Metabolism	8	-0.30517	0.0753375	-0.452829	-0.157511	5.11e-05	0.484545	0.0190988
Hyperlipidemia	272.1	M33997	C100001269	campesterol	Lipid	Sterol	8	0.187607	0.0299621	0.128882	0.246331	3.81e-10	0.403319	6.84e-07
Inflammatory bowel disease and other gastroenteritis and colitis	555	M01110	C229	arachidonate (20:4n6)	Lipid	Polyunsaturated Fatty Acid (n3 and n6)	8	-0.306326	0.079024	-0.461211	-0.151442	0.000106026	0.370238	0.0330171
Coronary atherosclerosis	411.4	M33997	C100001269	campesterol	Lipid	Sterol	8	0.192844	0.0383789	0.117623	0.268065	5.04e-07	0.356883	0.000504792
Regional enteritis	555.1	M52719	C100009166	phosphatidylcholine (16:0/22:5n3, 18:1/20:4)*	Lipid	Phospholipid Metabolism	8	-0.367537	0.0870035	-0.538061	-0.197014	2.4e-05	0.321359	0.0104971
Hypercholesterolemia	272.11	M33997	C100001269	campesterol	Lipid	Sterol	8	0.214272	0.0517928	0.11276	0.315784	3.52e-05	0.153136	0.014405
Cholelithiasis and cholecystitis	574	M36594	C100001778	1-linoleoyl-GPI (18:2)*	Lipid	Lysolipid	7	0.314219	0.0837963	0.149981	0.478457	0.000176978	0.427041	0.0447604
Mixed hyperlipidemia	272.13	M46798	C100002989	oleoyl-linoleoyl-glycerol (18:1/18:2) [1]	Lipid	Diacylglycerol	7	0.345968	0.0881747	0.173149	0.518787	8.72e-05	0.00838195	0.0288885
Hyperglyceridemia	272.12	M46798	C100002989	oleoyl-linoleoyl-glycerol (18:1/18:2) [1]	Lipid	Diacylglycerol	7	1.55907	0.337925	0.896745	2.22139	3.96e-06	0.00250103	0.00302778
Complications of surgical and medical procedures	1011	M37203	C100001994	androstenediol (3beta,17beta) disulfate (2)	Lipid	Steroid	6	0.698194	0.159132	0.386301	1.01009	1.15e-05	0.482212	0.00635297
Abnormal results of function study of pulmonary system	514.1	M34214	C100001654	1-arachidonoyl-GPI (20:4)*	Lipid	Lysolipid	6	-1.71689	0.41638	-2.53299	-0.900804	3.73e-05	0.371599	0.0151268
Hyperglyceridemia	272.12	M46799	C100002990	oleoyl-linoleoyl-glycerol (18:1/18:2) [2]	Lipid	Diacylglycerol	6	1.70992	0.264925	1.19068	2.22917	1.09e-10	0.0727693	2.56e-07
Mixed hyperlipidemia	272.13	M46799	C100002990	oleoyl-linoleoyl-glycerol (18:1/18:2) [2]	Lipid	Diacylglycerol	6	0.392812	0.09157	0.213338	0.572286	1.79e-05	0.0111201	0.0087533
Hyperlipidemia	272.1	M46799	C100002990	oleoyl-linoleoyl-glycerol (18:1/18:2) [2]	Lipid	Diacylglycerol	6	0.368911	0.0971545	0.178492	0.55933	0.000146365	0.000111157	0.0393893
Herpes zoster with nervous system complications	53.1	M12017	C1342	3-methoxytyrosine	Amino_Acid	Phenylalanine and Tyrosine Metabolism	5	1.32349	0.352609	0.632391	2.01459	0.000174434	0.803051	0.044712
Decreased white blood cell count	288.1	M52677	C100009069	1-(1-enyl-palmitoyl)-2-linoleoyl-GPE (P-16:0/18:2)*	Lipid	Plasmalogen	4	0.642388	0.122259	0.402766	0.882011	1.49e-07	0.897004	0.000180564
Atopic/contact dermatitis due to other or unspecified	939	M52677	C100009069	1-(1-enyl-palmitoyl)-2-linoleoyl-GPE (P-16:0/18:2)*	Lipid	Plasmalogen	4	0.473804	0.101306	0.275248	0.67236	2.91e-06	0.613914	0.00233422
Nasal polyps	471	M52738	C100009153	1-stearoyl-2-meadoyl-GPC (18:0/20:3n9)*	Lipid	Phospholipid Metabolism	4	1.0472	0.277729	0.502858	1.59154	0.000162874	0.408135	0.0420876
Gout and other crystal arthropathies	274	M01604	C1134	urate	Nucleotide	Purine Metabolism (Hypo)Xanthine/Inosine containing	4	1.63672	0.416085	0.821209	2.45223	8.37e-05	2.02e-08	0.0282368
Gout	274.1	M01604	C1134	urate	Nucleotide	Purine Metabolism (Hypo)Xanthine/Inosine containing	4	1.76707	0.460603	0.864309	2.66984	0.000124832	1.75e-11	0.036182
Portal hypertension	571.81	M27710	C100001006	N-acetylglycine	Amino_Acid	Glycine Serine and Threonine Metabolism	3	0.714259	0.18762	0.34653	1.08199	0.000140696	0.941754	0.0386965
Nasal polyps	471	M33969	C100001229	stearidonate (18:4n3)	Lipid	Polyunsaturated Fatty Acid (n3 and n6)	3	1.51137	0.385722	0.75537	2.26737	8.92e-05	0.887766	0.029013
Paraproteinemia	270.32	M43264	C100009271	(S)-3-hydroxybutyrylcarnitine	Lipid	Fatty Acid Metabolism(Acyl Carnitine)	3	1.03936	0.278072	0.494344	1.58437	0.000185696	0.697035	0.046338
Gouty arthropathy	274.11	M46417	C999913866	X - 13866	Uncharacterized	Uncharacterized	3	0.569215	0.152207	0.270895	0.867535	0.000184208	0.509714	0.0462731
Other nonspecific findings on examination of urine	598.9	M52616	C100008921	1-palmitoyl-2-stearoyl-GPC (16:0/18:0)	Lipid	Phospholipid Metabolism	3	1.21023	0.313249	0.596273	1.82419	0.000111786	0.291677	0.0339913
Hypercholesterolemia	272.11	M52478	C100009007	1-(1-enyl-palmitoyl)-2-oleoyl-GPC (P-16:0/18:1)*	Lipid	Plasmalogen	3	-0.489413	0.0996525	-0.684729	-0.294098	9.05e-07	0.161193	0.000830373
Hypercholesterolemia	272.11	M52616	C100008921	1-palmitoyl-2-stearoyl-GPC (16:0/18:0)	Lipid	Phospholipid Metabolism	3	0.326767	0.0840051	0.16212	0.491414	0.000100305	0.104331	0.0320297
Splenomegaly	579.2	M27710	C100001006	N-acetylglycine	Amino_Acid	Glycine Serine and Threonine Metabolism	3	0.977876	0.219708	0.547257	1.4085	8.55e-06	0.0758773	0.0056553
Disorders of lipoid metabolism	272	M52616	C100008921	1-palmitoyl-2-stearoyl-GPC (16:0/18:0)	Lipid	Phospholipid Metabolism	3	0.32673	0.0600312	0.209071	0.444389	5.25e-08	0.000268416	6.82e-05
Disorders of iron metabolism	275.1	M46417	C999913866	X - 13866	Uncharacterized	Uncharacterized	3	1.15323	0.301859	0.5616	1.74486	0.000133215	0.000198681	0.0377409
Mixed hyperlipidemia	272.13	M52616	C100008921	1-palmitoyl-2-stearoyl-GPC (16:0/18:0)	Lipid	Phospholipid Metabolism	3	0.335757	0.072825	0.193023	0.478491	4.02e-06	0.000146106	0.00302778
Hyperlipidemia	272.1	M52616	C100008921	1-palmitoyl-2-stearoyl-GPC (16:0/18:0)	Lipid	Phospholipid Metabolism	3	0.324749	0.0588761	0.209354	0.440144	3.47e-08	6.79e-05	4.85e-05
Hyperglyceridemia	272.12	M52616	C100008921	1-palmitoyl-2-stearoyl-GPC (16:0/18:0)	Lipid	Phospholipid Metabolism	3	1.24348	0.256826	0.740112	1.74685	1.29e-06	6.67e-10	0.00105434
Nonrheumatic aortic valve disorders	395.2	M00063	C266	cholesterol	Lipid	Sterol	2	0.670147	0.175631	0.325916	1.01438	0.000135828	0.953583	0.0379111
Unstable angina (intermediate coronary syndrome)	411.1	M37506	C100002107	palmitoyl sphingomyelin (d18:1/16:0)	Lipid	Sphingolipid Metabolism	2	1.10676	0.263103	0.591085	1.62243	2.59e-05	0.949038	0.0112299
Decreased white blood cell count	288.1	M52748	C100009225	1-(1-enyl-stearoyl)-2-linoleoyl-GPE (P-18:0/18:2)*	Lipid	Plasmalogen	2	0.616962	0.160013	0.303342	0.930582	0.000115402	0.943627	0.0347868
Decreased white blood cell count	288.1	M52453	C100008981	1-oleoyl-2-linoleoyl-GPC (18:1/18:2)*	Lipid	Phospholipid Metabolism	2	0.369377	0.0989324	0.175473	0.563281	0.000188738	0.917758	0.0467012
Ischemic Heart Disease	411	M37506	C100002107	palmitoyl sphingomyelin (d18:1/16:0)	Lipid	Sphingolipid Metabolism	2	0.51117	0.129351	0.257646	0.764694	7.76e-05	0.839643	0.027145
Hyperglyceridemia	272.12	M52470	C100008984	1-palmitoyl-2-palmitoleoyl-GPC (16:0/16:1)*	Lipid	Phospholipid Metabolism	2	1.75107	0.398326	0.970368	2.53178	1.1e-05	0.801612	0.00619877
Mixed hyperlipidemia	272.13	M52634	C100009055	palmitoyl-linoleoyl-glycerol (16:0/18:2) [2]*	Lipid	Diacylglycerol	2	0.589176	0.0831272	0.42625	0.752103	1.36e-12	0.76133	4.67e-09
Lymphadenitis	289.4	M52634	C100009055	palmitoyl-linoleoyl-glycerol (16:0/18:2) [2]*	Lipid	Diacylglycerol	2	0.532298	0.139443	0.258995	0.805601	0.00013491	0.749602	0.0379111
Disorders of lipoid metabolism	272	M52634	C100009055	palmitoyl-linoleoyl-glycerol (16:0/18:2) [2]*	Lipid	Diacylglycerol	2	0.531005	0.0687473	0.396263	0.665747	1.13e-14	0.743384	4.72e-11
Hyperlipidemia	272.1	M52634	C100009055	palmitoyl-linoleoyl-glycerol (16:0/18:2) [2]*	Lipid	Diacylglycerol	2	0.541501	0.0674408	0.409319	0.673682	9.8e-16	0.691303	7.39e-12
Hyperlipidemia	272.1	M52682	C100009009	1-(1-enyl-palmitoyl)-2-linoleoyl-GPC (P-16:0/18:2)*	Lipid	Plasmalogen	2	-0.383641	0.0916795	-0.56333	-0.203953	2.86e-05	0.67619	0.0122323
Coronary atherosclerosis	411.4	M37506	C100002107	palmitoyl sphingomyelin (d18:1/16:0)	Lipid	Sphingolipid Metabolism	2	0.565054	0.130759	0.308771	0.821336	1.55e-05	0.675285	0.00774477
Decreased white blood cell count	288.1	M52683	C100009075	1-palmitoleoyl-2-linoleoyl-GPC (16:1/18:2)*	Lipid	Phospholipid Metabolism	2	0.389861	0.101678	0.190576	0.589146	0.000125936	0.669307	0.0362233
Hyperglyceridemia	272.12	M52682	C100009009	1-(1-enyl-palmitoyl)-2-linoleoyl-GPC (P-16:0/18:2)*	Lipid	Plasmalogen	2	-1.99462	0.452046	-2.88061	-1.10863	1.02e-05	0.648569	0.00619877
Hypercholesterolemia	272.11	M52682	C100009009	1-(1-enyl-palmitoyl)-2-linoleoyl-GPC (P-16:0/18:2)*	Lipid	Plasmalogen	2	-0.49472	0.131034	-0.751542	-0.237897	0.000159689	0.647181	0.0417852
Gouty arthropathy	274.11	M48441	C100006082	4-hydroxychlorothalonil	Xenobiotics	Chemical	2	1.53112	0.160376	1.21679	1.84545	1.33e-21	0.490688	1.68e-17
Encounter for long-term (current) use of antiplatelets/antithrombotics	457.2	M00063	C266	cholesterol	Lipid	Sterol	2	1.43497	0.377721	0.694646	2.17529	0.000145277	0.484094	0.0393893
Disorders of lipoid metabolism	272	M52682	C100009009	1-(1-enyl-palmitoyl)-2-linoleoyl-GPC (P-16:0/18:2)*	Lipid	Plasmalogen	2	-0.404447	0.0933953	-0.587498	-0.221395	1.49e-05	0.474699	0.00773142
Hypercholesterolemia	272.11	M52634	C100009055	palmitoyl-linoleoyl-glycerol (16:0/18:2) [2]*	Lipid	Diacylglycerol	2	0.487958	0.0961607	0.299486	0.676429	3.89e-07	0.329799	0.00040686
Chronic liver disease and cirrhosis	571	M52470	C100008984	1-palmitoyl-2-palmitoleoyl-GPC (16:0/16:1)*	Lipid	Phospholipid Metabolism	2	0.617758	0.162764	0.298746	0.936771	0.000147396	0.321819	0.0393893
Nausea and vomiting	789	M52474	C100002875	1-(1-enyl-palmitoyl)-GPC (P-16:0)*	Lipid	Lysoplasmalogen	2	-0.375343	0.0988385	-0.569063	-0.181623	0.000146138	0.310789	0.0393893
Inflammatory bowel disease and other gastroenteritis and colitis	555	M18467	C2050	eicosapentaenoate (EPA; 20:5n3)	Lipid	Polyunsaturated Fatty Acid (n3 and n6)	2	-0.46364	0.124359	-0.70738	-0.2199	0.000192835	0.310019	0.0467012
Tobacco use disorder	318	M00485	C50	spermidine	Amino_Acid	Polyamine Metabolism	2	-0.328498	0.0838451	-0.492832	-0.164165	8.93e-05	0.282952	0.029013
Other chronic nonalcoholic liver disease	571.5	M52470	C100008984	1-palmitoyl-2-palmitoleoyl-GPC (16:0/16:1)*	Lipid	Phospholipid Metabolism	2	0.69782	0.157573	0.388981	1.00666	9.49e-06	0.264506	0.00596605
Disorders of lipoid metabolism	272	M52470	C100008984	1-palmitoyl-2-palmitoleoyl-GPC (16:0/16:1)*	Lipid	Phospholipid Metabolism	2	0.462958	0.0883781	0.289741	0.636176	1.62e-07	0.210788	0.000190742
Occlusion and stenosis of precerebral arteries	433.1	M37506	C100002107	palmitoyl sphingomyelin (d18:1/16:0)	Lipid	Sphingolipid Metabolism	2	0.992587	0.252381	0.497929	1.48725	8.39e-05	0.193694	0.0282368
Regional enteritis	555.1	M18467	C2050	eicosapentaenoate (EPA; 20:5n3)	Lipid	Polyunsaturated Fatty Acid (n3 and n6)	2	-0.525581	0.133324	-0.786891	-0.26427	8.08e-05	0.184862	0.0276649
Inflammatory bowel disease and other gastroenteritis and colitis	555	M52453	C100008981	1-oleoyl-2-linoleoyl-GPC (18:1/18:2)*	Lipid	Phospholipid Metabolism	2	0.383138	0.0995016	0.188119	0.578158	0.000117842	0.184732	0.0352006
Mixed hyperlipidemia	272.13	M52470	C100008984	1-palmitoyl-2-palmitoleoyl-GPC (16:0/16:1)*	Lipid	Phospholipid Metabolism	2	0.486756	0.107596	0.275871	0.697641	6.07e-06	0.177387	0.00439905
Mixed hyperlipidemia	272.13	M52682	C100009009	1-(1-enyl-palmitoyl)-2-linoleoyl-GPC (P-16:0/18:2)*	Lipid	Plasmalogen	2	-0.552084	0.113608	-0.774751	-0.329418	1.18e-06	0.173506	0.000985027
Hyperlipidemia	272.1	M52470	C100008984	1-palmitoyl-2-palmitoleoyl-GPC (16:0/16:1)*	Lipid	Phospholipid Metabolism	2	0.449459	0.0866912	0.279548	0.619371	2.16e-07	0.143246	0.00024718
Mixed hyperlipidemia	272.13	M37506	C100002107	palmitoyl sphingomyelin (d18:1/16:0)	Lipid	Sphingolipid Metabolism	2	0.873258	0.132063	0.614418	1.1321	3.78e-11	0.107132	1.02e-07
Inflammatory bowel disease and other gastroenteritis and colitis	555	M52683	C100009075	1-palmitoleoyl-2-linoleoyl-GPC (16:1/18:2)*	Lipid	Phospholipid Metabolism	2	0.383818	0.102358	0.1832	0.584435	0.000176999	0.0982672	0.0447604
Hyperglyceridemia	272.12	M52634	C100009055	palmitoyl-linoleoyl-glycerol (16:0/18:2) [2]*	Lipid	Diacylglycerol	2	2.31083	0.280379	1.7613	2.86036	1.7e-16	0.097223	1.6e-12
Hypercholesterolemia	272.11	M52470	C100008984	1-palmitoyl-2-palmitoleoyl-GPC (16:0/16:1)*	Lipid	Phospholipid Metabolism	2	0.472299	0.123397	0.230446	0.714151	0.000129458	0.0793575	0.0369544
Gout and other crystal arthropathies	274	M48441	C100006082	4-hydroxychlorothalonil	Xenobiotics	Chemical	2	1.31755	0.106035	1.10973	1.52538	1.9e-35	0.0772317	3.57e-31
Gout	274.1	M48441	C100006082	4-hydroxychlorothalonil	Xenobiotics	Chemical	2	1.4521	0.0993573	1.25736	1.64683	2.26e-48	0.0318166	8.5e-44
Other chronic nonalcoholic liver disease	571.5	M45951	C100005350	1-linolenoyl-GPC (18:3)*	Lipid	Lysolipid	2	0.701028	0.182662	0.343017	1.05904	0.000124118	0.00892486	0.036182
Hypercholesterolemia	272.11	M37506	C100002107	palmitoyl sphingomyelin (d18:1/16:0)	Lipid	Sphingolipid Metabolism	2	0.960293	0.153053	0.660314	1.26027	3.51e-10	0.00685666	6.62e-07
Disorders of lipoid metabolism	272	M37506	C100002107	palmitoyl sphingomyelin (d18:1/16:0)	Lipid	Sphingolipid Metabolism	2	0.811983	0.107541	0.601206	1.02276	4.34e-14	0.00673572	1.63e-10
Hyperlipidemia	272.1	M37506	C100002107	palmitoyl sphingomyelin (d18:1/16:0)	Lipid	Sphingolipid Metabolism	2	0.829597	0.105527	0.622768	1.03643	3.8e-15	0.00376063	2.38e-11
Disorders of iron metabolism	275.1	M46409	C999921364	X - 21364	Uncharacterized	Uncharacterized	2	-1.72856	0.425025	-2.5616	-0.895529	4.76e-05	0.000455195	0.0186942
Disorders of bilirubin excretion	277.4	M49681	C999923782	X - 23782	Uncharacterized	Uncharacterized	2	3.00298	0.612577	1.80236	4.20361	9.48e-07	0.000254103	0.000830373
Gout	274.1	M52634	C100009055	palmitoyl-linoleoyl-glycerol (16:0/18:2) [2]*	Lipid	Diacylglycerol	2	0.820876	0.149849	0.527177	1.11457	4.3e-08	4.02e-06	5.79e-05
Mixed hyperlipidemia	272.13	M00063	C266	cholesterol	Lipid	Sterol	2	0.446092	0.10532	0.239669	0.652515	2.28e-05	2.81e-06	0.0102254
Gout and other crystal arthropathies	274	M52634	C100009055	palmitoyl-linoleoyl-glycerol (16:0/18:2) [2]*	Lipid	Diacylglycerol	2	0.819605	0.158586	0.508783	1.13043	2.36e-07	2.13e-06	0.000261913
Gout and other crystal arthropathies	274	M52470	C100008984	1-palmitoyl-2-palmitoleoyl-GPC (16:0/16:1)*	Lipid	Phospholipid Metabolism	2	0.90299	0.205137	0.500929	1.30505	1.07e-05	1.12e-07	0.00619877
Hypercholesterolemia	272.11	M00063	C266	cholesterol	Lipid	Sterol	2	0.534586	0.122218	0.295044	0.774129	1.22e-05	8.56e-08	0.00666048
Gout	274.1	M52470	C100008984	1-palmitoyl-2-palmitoleoyl-GPC (16:0/16:1)*	Lipid	Phospholipid Metabolism	2	0.860339	0.194284	0.479549	1.24113	9.5e-06	7.17e-08	0.00596605
Disorders of lipoid metabolism	272	M00063	C266	cholesterol	Lipid	Sterol	2	0.464635	0.0861118	0.295859	0.633411	6.83e-08	2.47e-08	8.57e-05
Hyperlipidemia	272.1	M00063	C266	cholesterol	Lipid	Sterol	2	0.485782	0.0845351	0.320096	0.651468	9.11e-09	6.38e-09	1.37e-05
Disorders of lipoid metabolism	272	M52633	C100009052	palmitoyl-linoleoyl-glycerol (16:0/18:2) [1]*	Lipid	Diacylglycerol	1	0.597616	0.0936068	0.41415	0.781082	1.72e-10	NA	3.82e-07
Disorders of lipoid metabolism	272	M27447	C100001040	1-linoleoylglycerol (18:2)	Lipid	Monoacylglycerol	1	0.726804	0.125153	0.481508	0.972099	6.35e-09	NA	9.97e-06
Disorders of lipoid metabolism	272	M42459	C100004329	sphingomyelin (d18:2/16:0, d18:1/16:1)*	Lipid	Sphingolipid Metabolism	1	0.589328	0.136427	0.321937	0.85672	1.56e-05	NA	0.00774477
Disorders of lipoid metabolism	272	M52281	C100008928	2-hydroxybutyrate/2-hydroxyisobutyrate	Amino_Acid	Methionine Cysteine SAM and Taurine Metabolism	1	0.55883	0.134733	0.294759	0.822901	3.36e-05	NA	0.013906
Hyperlipidemia	272.1	M52633	C100009052	palmitoyl-linoleoyl-glycerol (16:0/18:2) [1]*	Lipid	Diacylglycerol	1	0.612537	0.0918109	0.432591	0.792483	2.53e-11	NA	7.33e-08
Hyperlipidemia	272.1	M27447	C100001040	1-linoleoylglycerol (18:2)	Lipid	Monoacylglycerol	1	0.73053	0.122828	0.489793	0.971268	2.72e-09	NA	4.66e-06
Hyperlipidemia	272.1	M42459	C100004329	sphingomyelin (d18:2/16:0, d18:1/16:1)*	Lipid	Sphingolipid Metabolism	1	0.588785	0.133706	0.326726	0.850843	1.06e-05	NA	0.00619877
Hyperlipidemia	272.1	M52281	C100008928	2-hydroxybutyrate/2-hydroxyisobutyrate	Amino_Acid	Methionine Cysteine SAM and Taurine Metabolism	1	0.56524	0.13222	0.306093	0.824386	1.91e-05	NA	0.00914736
Hyperglyceridemia	272.12	M52633	C100009052	palmitoyl-linoleoyl-glycerol (16:0/18:2) [1]*	Lipid	Diacylglycerol	1	2.8444	0.362769	2.13338	3.55541	4.48e-15	NA	2.41e-11
Hyperglyceridemia	272.12	M27447	C100001040	1-linoleoylglycerol (18:2)	Lipid	Monoacylglycerol	1	3.8183	0.488672	2.86052	4.77608	5.56e-15	NA	2.62e-11
Mixed hyperlipidemia	272.13	M52633	C100009052	palmitoyl-linoleoyl-glycerol (16:0/18:2) [1]*	Lipid	Diacylglycerol	1	0.663101	0.112776	0.442064	0.884139	4.11e-09	NA	6.73e-06
Mixed hyperlipidemia	272.13	M27447	C100001040	1-linoleoylglycerol (18:2)	Lipid	Monoacylglycerol	1	0.779217	0.151131	0.483006	1.07543	2.52e-07	NA	0.000271745
Mixed hyperlipidemia	272.13	M42459	C100004329	sphingomyelin (d18:2/16:0, d18:1/16:1)*	Lipid	Sphingolipid Metabolism	1	0.715242	0.165432	0.391002	1.03948	1.54e-05	NA	0.00774477
Mixed hyperlipidemia	272.13	M52281	C100008928	2-hydroxybutyrate/2-hydroxyisobutyrate	Amino_Acid	Methionine Cysteine SAM and Taurine Metabolism	1	0.639006	0.163925	0.31772	0.960293	9.69e-05	NA	0.0312135
Gout and other crystal arthropathies	274	M52281	C100008928	2-hydroxybutyrate/2-hydroxyisobutyrate	Amino_Acid	Methionine Cysteine SAM and Taurine Metabolism	1	2.04304	0.309921	1.43561	2.65047	4.34e-11	NA	1.09e-07
Gout	274.1	M52281	C100008928	2-hydroxybutyrate/2-hydroxyisobutyrate	Amino_Acid	Methionine Cysteine SAM and Taurine Metabolism	1	1.95944	0.293639	1.38392	2.53496	2.51e-11	NA	7.33e-08
Disorders of iron metabolism	275.1	M31787	C100001178	3-carboxy-4-methyl-5-propyl-2-furanpropanoate (CMPF)	Lipid	Fatty Acid Dicarboxylate	1	-4.64752	0.811407	-6.23785	-3.05719	1.02e-08	NA	1.48e-05
Disorders of bilirubin excretion	277.4	M47478	C999910458	X - 10458	Uncharacterized	Uncharacterized	1	-3.35752	0.527945	-4.39228	-2.32277	2.02e-10	NA	4.23e-07
Encounter for long-term (current) use of anticoagulants	286.2	M32445	C100001108	3-methylxanthine	Xenobiotics	Xanthine Metabolism	1	-0.529717	0.140499	-0.805089	-0.254344	0.000163078	NA	0.0420876
Hypertensive heart disease	401.21	M33447	C452	palmitoleate (16:1n7)	Lipid	Long Chain Fatty Acid	1	-0.746212	0.172081	-1.08349	-0.408939	1.45e-05	NA	0.00768682
Hypertensive heart disease	401.21	M47118	C100001561	2-palmitoleoyl-GPC (16:1)*	Lipid	Lysolipid	1	-0.652936	0.150571	-0.94805	-0.357821	1.45e-05	NA	0.00768682
Hypertensive chronic kidney disease	401.22	M33447	C452	palmitoleate (16:1n7)	Lipid	Long Chain Fatty Acid	1	-0.733738	0.17276	-1.07234	-0.395135	2.17e-05	NA	0.00982882
Hypertensive chronic kidney disease	401.22	M47118	C100001561	2-palmitoleoyl-GPC (16:1)*	Lipid	Lysolipid	1	-0.642021	0.151165	-0.938299	-0.345743	2.17e-05	NA	0.00982882
Coronary atherosclerosis	411.4	M33447	C452	palmitoleate (16:1n7)	Lipid	Long Chain Fatty Acid	1	-0.540341	0.108101	-0.752215	-0.328467	5.78e-07	NA	0.000544321
Coronary atherosclerosis	411.4	M47118	C100001561	2-palmitoleoyl-GPC (16:1)*	Lipid	Lysolipid	1	-0.472798	0.0945883	-0.658188	-0.287408	5.78e-07	NA	0.000544321
\Other chronic ischemic heart disease, unspecified\	411.8	M33447	C452	palmitoleate (16:1n7)	Lipid	Long Chain Fatty Acid	1	-0.698997	0.164267	-1.02095	-0.377039	2.09e-05	NA	0.009714
\Other chronic ischemic heart disease, unspecified\	411.8	M47118	C100001561	2-palmitoleoyl-GPC (16:1)*	Lipid	Lysolipid	1	-0.611622	0.143734	-0.893335	-0.329909	2.09e-05	NA	0.009714
Chronic pulmonary heart disease	415.2	M38637	C100002253	cinnamoylglycine	Xenobiotics	Food Component/Plant	1	1.2476	0.32986	0.601089	1.89412	0.000155437	NA	0.0412457
Cardiomegaly	416	M48047	C999918886	X - 18886	Uncharacterized	Uncharacterized	1	0.754111	0.178476	0.404305	1.10392	2.39e-05	NA	0.0104971
Inflammatory bowel disease and other gastroenteritis and colitis	555	M32504	C100001181	docosapentaenoate (n3 DPA; 22:5n3)	Lipid	Polyunsaturated Fatty Acid (n3 and n6)	1	-0.810506	0.210581	-1.22324	-0.397776	0.000118643	NA	0.0352006
Inflammatory bowel disease and other gastroenteritis and colitis	555	M52710	C100009131	1-linoleoyl-2-arachidonoyl-GPC (18:2/20:4n6)*	Lipid	Phospholipid Metabolism	1	-0.570804	0.14859	-0.862035	-0.279573	0.000122301	NA	0.0360023
Inflammatory bowel disease and other gastroenteritis and colitis	555	M33871	C100001553	1-dihomo-linoleoyl-GPC (20:2)*	Lipid	Lysolipid	1	0.54518	0.142992	0.264921	0.825439	0.000137478	NA	0.0380894
Regional enteritis	555.1	M52710	C100009131	1-linoleoyl-2-arachidonoyl-GPC (18:2/20:4n6)*	Lipid	Phospholipid Metabolism	1	-0.679816	0.159049	-0.991546	-0.368085	1.92e-05	NA	0.00914736
Regional enteritis	555.1	M32504	C100001181	docosapentaenoate (n3 DPA; 22:5n3)	Lipid	Polyunsaturated Fatty Acid (n3 and n6)	1	-0.937662	0.225528	-1.37969	-0.495636	3.22e-05	NA	0.0136137
Regional enteritis	555.1	M19132	C100000660	1,2-distearoyl-GPC (18:0/18:0)	Lipid	Phospholipid Metabolism	1	-0.877796	0.211384	-1.2921	-0.46349	3.29e-05	NA	0.0137621
Regional enteritis	555.1	M33871	C100001553	1-dihomo-linoleoyl-GPC (20:2)*	Lipid	Lysolipid	1	0.629485	0.153148	0.329321	0.929649	3.95e-05	NA	0.0158384
Regional enteritis	555.1	M52475	C100008999	1-(1-enyl-stearoyl)-2-arachidonoyl-GPE (P-18:0/20:4)*	Lipid	Plasmalogen	1	-0.695501	0.179857	-1.04801	-0.342987	0.0001102	NA	0.0339913
Celiac disease	557.1	M36099	C100001756	4-ethylphenylsulfate	Xenobiotics	Benzoate Metabolism	1	2.07653	0.463641	1.16781	2.98525	7.51e-06	NA	0.00520324
Celiac disease	557.1	M46590	C999907765	X - 07765	Uncharacterized	Uncharacterized	1	2.56406	0.572809	1.44138	3.68675	7.59e-06	NA	0.00520324
Noninfectious gastroenteritis	558	M37482	C100002128	17alpha-hydroxypregnenolone 3-sulfate	Lipid	Steroid	1	-0.83975	0.20734	-1.24613	-0.433371	5.12e-05	NA	0.0190988
Jaundice (not of newborn)	573.5	M47478	C999910458	X - 10458	Uncharacterized	Uncharacterized	1	-1.39822	0.300843	-1.98787	-0.808582	3.36e-06	NA	0.00263516
Cholelithiasis and cholecystitis	574	M47478	C999910458	X - 10458	Uncharacterized	Uncharacterized	1	-0.71266	0.176823	-1.05923	-0.366093	5.57e-05	NA	0.0205732
Nausea and vomiting	789	M52437	C100008957	sphingomyelin (d18:2/24:1, d18:1/24:2)*	Lipid	Sphingolipid Metabolism	1	-0.532806	0.142896	-0.812878	-0.252735	0.000192526	NA	0.0467012

## Sheet: ST4
Supplemental table 4: Inverse-variance weighted association (IVWA), MR-Egger and weighted median mendelian randomization results for the association between metabolites and BioVU phenotypes in African ancestry. Associations shaded in grey were not taken forward for validation due to 1) fewer than 3 SNPs in genetic instrument, or 2) significant heterogeneity
Phenotype	Phenotype.codes	Metabolite ID1	Metabolite ID2	Metabolite biochemical name	Super pathway	Sub pathway	SNP number	Estimate	Standard Error	Lower CI	Upper CI	P-value	Heterogeneity P-Value	FDR P-value
Urinary tract infection	591	M01110	C229	arachidonate (20:4n6)	Lipid	Polyunsaturated Fatty Acid (n3 and n6)	8	-0.456824	0.101575	-0.655908	-0.25774	6.88e-06	0.350673	0.00744075
Urinary tract infection	591	M36593	C100001776	2-linoleoyl-GPE (18:2)*	Lipid	Lysolipid	6	0.464794	0.124966	0.219864	0.709724	0.000199734	0.897174	0.0381256
Urinary tract infection	591	M33969	C100001229	stearidonate (18:4n3)	Lipid	Polyunsaturated Fatty Acid (n3 and n6)	3	-0.790996	0.198306	-1.17967	-0.402323	6.64e-05	0.631275	0.0217425
Fever of unknown origin	783	M33969	C100001229	stearidonate (18:4n3)	Lipid	Polyunsaturated Fatty Acid (n3 and n6)	3	-0.826323	0.2034	-1.22498	-0.427668	4.85e-05	0.567189	0.0217425
Gout	274.1	M48441	C100006082	4-hydroxychlorothalonil	Xenobiotics	Chemical	2	1.90002	0.346382	1.22112	2.57891	4.13e-08	0.805603	0.000133925
Hyperlipidemia	272.1	M37506	C100002107	palmitoyl sphingomyelin (d18:1/16:0)	Lipid	Sphingolipid Metabolism	2	0.749437	0.208994	0.339817	1.15906	0.000335883	0.728545	0.0495427
Fever of unknown origin	783	M18467	C2050	eicosapentaenoate (EPA; 20:5n3)	Lipid	Polyunsaturated Fatty Acid (n3 and n6)	2	-0.884937	0.220586	-1.31728	-0.452596	6.03e-05	0.63124	0.0217425
Gout and other crystal arthropathies	274	M48441	C100006082	4-hydroxychlorothalonil	Xenobiotics	Chemical	2	1.73197	0.379793	0.987594	2.47635	5.11e-06	0.598918	0.00744075
Sepsis and SIRS	994	M52715	C100009161	1-(1-enyl-palmitoyl)-2-myristoyl-GPC (P-16:0/14:0)*	Lipid	Plasmalogen	2	-1.46116	0.385374	-2.21648	-0.705844	0.000149712	0.509059	0.0351893
Gouty arthropathy	274.11	M48441	C100006082	4-hydroxychlorothalonil	Xenobiotics	Chemical	2	2.06877	0.507807	1.07349	3.06406	4.62e-05	0.422746	0.0217425
Urinary tract infection	591	M52748	C100009225	1-(1-enyl-stearoyl)-2-linoleoyl-GPE (P-18:0/18:2)*	Lipid	Plasmalogen	2	0.756676	0.203413	0.357993	1.15536	0.000199306	0.403286	0.0381256
Fever of unknown origin	783	M52474	C100002875	1-(1-enyl-palmitoyl)-GPC (P-16:0)*	Lipid	Lysoplasmalogen	2	-1.03337	0.281206	-1.58453	-0.48222	0.000238046	0.362521	0.0429144
Other disorders of arteries and arterioles	447	M31943	C100001145	3-hydroxysebacate	Lipid	Fatty Acid Monohydroxy	2	-2.1671	0.543584	-3.2325	-1.10169	6.7e-05	0.170335	0.0217425
Sepsis and SIRS	994	M52474	C100002875	1-(1-enyl-palmitoyl)-GPC (P-16:0)*	Lipid	Lysoplasmalogen	2	-1.91856	0.468946	-2.83768	-0.999444	4.29e-05	0.130867	0.0217425
Degeneration of intervertebral disc	722.6	M31943	C100001145	3-hydroxysebacate	Lipid	Fatty Acid Monohydroxy	2	-0.922643	0.238174	-1.38946	-0.455831	0.00010714	0.0875143	0.0316064
Hypercholesterolemia	272.11	M33447	C452	palmitoleate (16:1n7)	Lipid	Long Chain Fatty Acid	1	-1.02772	0.28649	-1.58923	-0.466207	0.000334154	NA	0.0495427
Inflammatory and toxic neuropathy	357	M00554	C880	adenine	Nucleotide	Purine Metabolism Adenine containing	1	-3.67889	0.9756	-5.59103	-1.76675	0.000162663	NA	0.0351893
Encounter for long-term (current) use of anticoagulants, antithrombotics, aspirin	457	M52710	C100009131	1-linoleoyl-2-arachidonoyl-GPC (18:2/20:4n6)*	Lipid	Phospholipid Metabolism	1	-1.68427	0.465854	-2.59733	-0.771211	0.000299837	NA	0.0495427
Acute renal failure	585.1	M52710	C100009131	1-linoleoyl-2-arachidonoyl-GPC (18:2/20:4n6)*	Lipid	Phospholipid Metabolism	1	-0.694372	0.192403	-1.07147	-0.31727	0.00030743	NA	0.0495427
Acute renal failure	585.1	M52698	C100002871	1-adrenoyl-GPC (22:4)*	Lipid	Lysolipid	1	-0.973516	0.258127	-1.47944	-0.467597	0.000162293	NA	0.0351893
Urinary tract infection	591	M52698	C100002871	1-adrenoyl-GPC (22:4)*	Lipid	Lysolipid	1	-1.06562	0.261704	-1.57855	-0.552687	4.66e-05	NA	0.0217425
Sepsis and SIRS	994	M52630	C100009008	1-(1-enyl-palmitoyl)-2-docosahexaenoyl-GPC (P-16:0/22:6)*	Lipid	Plasmalogen	1	-2.3142	0.604285	-3.49857	-1.12982	0.000128327	NA	0.0347018

## Sheet: ST5
Supplemental table 5: List of single nucleotide polymorphisms (SNP) driving each significant metabolite-phenotype association by mendelian randomization (IVWA) in European ancestry.
Chromosome	Position	SNPs	Region	Gene	Metabolite ID1	Metabolite ID2	Phenotype codes	Phenotype	Metabolite biochemical name	Super pathway	Sub pathway	Freq	beta_GRS	pval	beta_se	Effect allele	Noneffect allele	beta	P_y	se_dgc	reversed	Beta_Adj	SNP Number
1	76167924	rs76963882:76167924:T:C	intergenic	SLC44A5(dist=86230),ACADM(dist=22108)	M43264	C100009271	270.32	Paraproteinemia	(S)-3-hydroxybutyrylcarnitine	Lipid	Fatty Acid Metabolism(Acyl Carnitine)	0.26	0.2	6.5e-20	0.021	C	T	0.250844	0.00110036	0.0768619	0	0.250844	3
10	61469090	rs1171615:61469090:C:T	intronic	SLC16A9	M43264	C100009271	270.32	Paraproteinemia	(S)-3-hydroxybutyrylcarnitine	Lipid	Fatty Acid Metabolism(Acyl Carnitine)	0.14	0.2	6.1e-14	0.026	C	T	-0.149419	0.103237	0.0917043	1	0.149419	3
5	131759825	rs77335401:131759825:T:C	ncRNA_intronic	C5orf56	M43264	C100009271	270.32	Paraproteinemia	(S)-3-hydroxybutyrylcarnitine	Lipid	Fatty Acid Metabolism(Acyl Carnitine)	0.21	0.13	5.5e-09	0.023	C	T	0.129132	0.238968	0.109659	0	0.129132	3
11	60899767	rs754382:60899767:A:G	exonic	VPS37C	M52689	C100009014	789	Nausea and vomiting	1-(1-enyl-palmitoyl)-2-arachidonoyl-GPC (P-16:0/20:4)*	Lipid	Plasmalogen	0.26	0.12	2.2e-08	0.021	A	G	0.0375366	0.0362036	0.0179181	1	-0.0375366	12
11	61416913	rs1615089:61416913:T:A	intergenic	RPLP0P2(dist=9992),DAGLA(dist=30992)	M52689	C100009014	789	Nausea and vomiting	1-(1-enyl-palmitoyl)-2-arachidonoyl-GPC (P-16:0/20:4)*	Lipid	Plasmalogen	0.17	0.16	2.6e-10	0.025	A	T	-0.0164516	0.579574	0.0296952	0	-0.0164516	12
11	61557803	rs102275:61557803:T:C	intronic	TMEM258	M52689	C100009014	789	Nausea and vomiting	1-(1-enyl-palmitoyl)-2-arachidonoyl-GPC (P-16:0/20:4)*	Lipid	Plasmalogen	0.42	-0.42	2e-115	0.018	C	T	0.0591836	0.00101333	0.018006	0	0.0591836	12
11	61645892	rs174452:61645892:G:A	intronic	FADS3	M52689	C100009014	789	Nausea and vomiting	1-(1-enyl-palmitoyl)-2-arachidonoyl-GPC (P-16:0/20:4)*	Lipid	Plasmalogen	0.11	0.2	9.3e-11	0.03	A	G	-0.0289305	0.310799	0.0285437	0	-0.0289305	12
11	61653164	rs116139751:61653164:C:T	intronic	FADS3	M52689	C100009014	789	Nausea and vomiting	1-(1-enyl-palmitoyl)-2-arachidonoyl-GPC (P-16:0/20:4)*	Lipid	Plasmalogen	0.11	-0.25	7.7e-17	0.03	T	C	0.0229545	0.512927	0.0350797	0	0.0229545	12
11	61667879	rs112543847:61667879:C:T	intronic	RAB3IL1	M52689	C100009014	789	Nausea and vomiting	1-(1-enyl-palmitoyl)-2-arachidonoyl-GPC (P-16:0/20:4)*	Lipid	Plasmalogen	0.083	-0.21	8.3e-11	0.033	T	C	0.0456615	0.226454	0.0377483	0	0.0456615	12
11	61809694	rs12277563:61809694:T:C	intergenic	FTH1(dist=74562),INCENP(dist=81751)	M52689	C100009014	789	Nausea and vomiting	1-(1-enyl-palmitoyl)-2-arachidonoyl-GPC (P-16:0/20:4)*	Lipid	Plasmalogen	0.47	0.11	1.2e-09	0.019	T	C	0.00446004	0.795756	0.0172164	1	-0.00446004	12
11	61827072	rs58451960:61827072:C:T	intergenic	FTH1(dist=91940),INCENP(dist=64373)	M52689	C100009014	789	Nausea and vomiting	1-(1-enyl-palmitoyl)-2-arachidonoyl-GPC (P-16:0/20:4)*	Lipid	Plasmalogen	0.13	-0.17	1.6e-10	0.027	T	C	0.00261657	0.910867	0.0233865	0	0.00261657	12
11	62183007	rs10897270:62183007:C:T	intergenic	ASRGL1(dist=22120),SCGB1A1(dist=3500)	M52689	C100009014	789	Nausea and vomiting	1-(1-enyl-palmitoyl)-2-arachidonoyl-GPC (P-16:0/20:4)*	Lipid	Plasmalogen	0.34	0.11	1.1e-08	0.02	C	T	-0.0195621	0.262367	0.0174533	1	0.0195621	12
14	66793363	rs800856:66793363:C:T	intergenic	FUT8(dist=582524),CCDC196(dist=159726)	M52689	C100009014	789	Nausea and vomiting	1-(1-enyl-palmitoyl)-2-arachidonoyl-GPC (P-16:0/20:4)*	Lipid	Plasmalogen	0.13	-0.17	5.1e-10	0.028	C	T	-0.0639638	0.0625893	0.0343502	1	0.0639638	12
14	67964688	rs12878807:67964688:T:A	intronic	TMEM229B	M52689	C100009014	789	Nausea and vomiting	1-(1-enyl-palmitoyl)-2-arachidonoyl-GPC (P-16:0/20:4)*	Lipid	Plasmalogen	0.45	-0.26	1.5e-45	0.018	A	T	0.0288984	0.0923631	0.0171726	0	0.0288984	12
14	68027809	rs12589605:68027809:A:G	intronic	PLEKHH1	M52689	C100009014	789	Nausea and vomiting	1-(1-enyl-palmitoyl)-2-arachidonoyl-GPC (P-16:0/20:4)*	Lipid	Plasmalogen	0.26	-0.11	3.8e-08	0.021	G	A	-0.0150426	0.469476	0.0207959	0	-0.0150426	12
11	60899767	rs754382:60899767:A:G	exonic	VPS37C	M52689	C100009014	797	Shock	1-(1-enyl-palmitoyl)-2-arachidonoyl-GPC (P-16:0/20:4)*	Lipid	Plasmalogen	0.26	0.12	2.2e-08	0.021	A	G	-0.011768	0.777759	0.0416952	1	0.011768	12
11	61416913	rs1615089:61416913:T:A	intergenic	RPLP0P2(dist=9992),DAGLA(dist=30992)	M52689	C100009014	797	Shock	1-(1-enyl-palmitoyl)-2-arachidonoyl-GPC (P-16:0/20:4)*	Lipid	Plasmalogen	0.17	0.16	2.6e-10	0.025	A	T	-0.0783854	0.266526	0.0705479	0	-0.0783854	12
11	61557803	rs102275:61557803:T:C	intronic	TMEM258	M52689	C100009014	797	Shock	1-(1-enyl-palmitoyl)-2-arachidonoyl-GPC (P-16:0/20:4)*	Lipid	Plasmalogen	0.42	-0.42	2e-115	0.018	C	T	0.104036	0.0118468	0.0413386	0	0.104036	12
11	61645892	rs174452:61645892:G:A	intronic	FADS3	M52689	C100009014	797	Shock	1-(1-enyl-palmitoyl)-2-arachidonoyl-GPC (P-16:0/20:4)*	Lipid	Plasmalogen	0.11	0.2	9.3e-11	0.03	A	G	-0.0970915	0.149619	0.0673835	0	-0.0970915	12
11	61653164	rs116139751:61653164:C:T	intronic	FADS3	M52689	C100009014	797	Shock	1-(1-enyl-palmitoyl)-2-arachidonoyl-GPC (P-16:0/20:4)*	Lipid	Plasmalogen	0.11	-0.25	7.7e-17	0.03	T	C	-0.0348979	0.674439	0.0830769	0	-0.0348979	12
11	61667879	rs112543847:61667879:C:T	intronic	RAB3IL1	M52689	C100009014	797	Shock	1-(1-enyl-palmitoyl)-2-arachidonoyl-GPC (P-16:0/20:4)*	Lipid	Plasmalogen	0.083	-0.21	8.3e-11	0.033	T	C	0.0379218	0.662872	0.0869834	0	0.0379218	12
11	61809694	rs12277563:61809694:T:C	intergenic	FTH1(dist=74562),INCENP(dist=81751)	M52689	C100009014	797	Shock	1-(1-enyl-palmitoyl)-2-arachidonoyl-GPC (P-16:0/20:4)*	Lipid	Plasmalogen	0.47	0.11	1.2e-09	0.019	T	C	0.0565505	0.154613	0.0397276	1	-0.0565505	12
11	61827072	rs58451960:61827072:C:T	intergenic	FTH1(dist=91940),INCENP(dist=64373)	M52689	C100009014	797	Shock	1-(1-enyl-palmitoyl)-2-arachidonoyl-GPC (P-16:0/20:4)*	Lipid	Plasmalogen	0.13	-0.17	1.6e-10	0.027	T	C	0.145268	0.00509509	0.0518635	0	0.145268	12
11	62183007	rs10897270:62183007:C:T	intergenic	ASRGL1(dist=22120),SCGB1A1(dist=3500)	M52689	C100009014	797	Shock	1-(1-enyl-palmitoyl)-2-arachidonoyl-GPC (P-16:0/20:4)*	Lipid	Plasmalogen	0.34	0.11	1.1e-08	0.02	C	T	0.0142184	0.723248	0.0401438	1	-0.0142184	12
14	66793363	rs800856:66793363:C:T	intergenic	FUT8(dist=582524),CCDC196(dist=159726)	M52689	C100009014	797	Shock	1-(1-enyl-palmitoyl)-2-arachidonoyl-GPC (P-16:0/20:4)*	Lipid	Plasmalogen	0.13	-0.17	5.1e-10	0.028	C	T	-0.0995717	0.218237	0.0808719	1	0.0995717	12
14	67964688	rs12878807:67964688:T:A	intronic	TMEM229B	M52689	C100009014	797	Shock	1-(1-enyl-palmitoyl)-2-arachidonoyl-GPC (P-16:0/20:4)*	Lipid	Plasmalogen	0.45	-0.26	1.5e-45	0.018	A	T	0.0565788	0.154227	0.0397114	0	0.0565788	12
14	68027809	rs12589605:68027809:A:G	intronic	PLEKHH1	M52689	C100009014	797	Shock	1-(1-enyl-palmitoyl)-2-arachidonoyl-GPC (P-16:0/20:4)*	Lipid	Plasmalogen	0.26	-0.11	3.8e-08	0.021	G	A	0.0305874	0.519573	0.0475029	0	0.0305874	12
16	56999258	rs7203984:56999258:A:C	intronic	CETP	M52682	C100009009	272	Disorders of lipoid metabolism	1-(1-enyl-palmitoyl)-2-linoleoyl-GPC (P-16:0/18:2)*	Lipid	Plasmalogen	0.19	-0.13	2e-08	0.023	C	A	0.0622139	0.000605351	0.0181414	0	0.0622139	2
8	19833156	rs80073370:19833156:A:T	intergenic	LPL(dist=8386),SLC18A1(dist=169210)	M52682	C100009009	272	Disorders of lipoid metabolism	1-(1-enyl-palmitoyl)-2-linoleoyl-GPC (P-16:0/18:2)*	Lipid	Plasmalogen	0.06	0.21	2.8e-08	0.038	T	A	-0.0723051	0.00615807	0.0263962	0	-0.0723051	2
16	56999258	rs7203984:56999258:A:C	intronic	CETP	M52682	C100009009	272.11	Hypercholesterolemia	1-(1-enyl-palmitoyl)-2-linoleoyl-GPC (P-16:0/18:2)*	Lipid	Plasmalogen	0.19	-0.13	2e-08	0.023	C	A	0.0728229	0.00387672	0.0252159	0	0.0728229	2
8	19833156	rs80073370:19833156:A:T	intergenic	LPL(dist=8386),SLC18A1(dist=169210)	M52682	C100009009	272.11	Hypercholesterolemia	1-(1-enyl-palmitoyl)-2-linoleoyl-GPC (P-16:0/18:2)*	Lipid	Plasmalogen	0.06	0.21	2.8e-08	0.038	T	A	-0.0923522	0.0133397	0.0373206	0	-0.0923522	2
16	56999258	rs7203984:56999258:A:C	intronic	CETP	M52682	C100009009	272.12	Hyperglyceridemia	1-(1-enyl-palmitoyl)-2-linoleoyl-GPC (P-16:0/18:2)*	Lipid	Plasmalogen	0.19	-0.13	2e-08	0.023	C	A	0.235681	0.00263049	0.0783546	0	0.235681	2
8	19833156	rs80073370:19833156:A:T	intergenic	LPL(dist=8386),SLC18A1(dist=169210)	M52682	C100009009	272.12	Hyperglyceridemia	1-(1-enyl-palmitoyl)-2-linoleoyl-GPC (P-16:0/18:2)*	Lipid	Plasmalogen	0.06	0.21	2.8e-08	0.038	T	A	-0.467927	0.0011127	0.14352	0	-0.467927	2
16	56999258	rs7203984:56999258:A:C	intronic	CETP	M52682	C100009009	272.1	Hyperlipidemia	1-(1-enyl-palmitoyl)-2-linoleoyl-GPC (P-16:0/18:2)*	Lipid	Plasmalogen	0.19	-0.13	2e-08	0.023	C	A	0.0554063	0.00187628	0.0178196	0	0.0554063	2
8	19833156	rs80073370:19833156:A:T	intergenic	LPL(dist=8386),SLC18A1(dist=169210)	M52682	C100009009	272.1	Hyperlipidemia	1-(1-enyl-palmitoyl)-2-linoleoyl-GPC (P-16:0/18:2)*	Lipid	Plasmalogen	0.06	0.21	2.8e-08	0.038	T	A	-0.0733301	0.0046323	0.0258977	0	-0.0733301	2
16	56999258	rs7203984:56999258:A:C	intronic	CETP	M52682	C100009009	272.13	Mixed hyperlipidemia	1-(1-enyl-palmitoyl)-2-linoleoyl-GPC (P-16:0/18:2)*	Lipid	Plasmalogen	0.19	-0.13	2e-08	0.023	C	A	0.0937271	1.82e-05	0.0218716	0	0.0937271	2
8	19833156	rs80073370:19833156:A:T	intergenic	LPL(dist=8386),SLC18A1(dist=169210)	M52682	C100009009	272.13	Mixed hyperlipidemia	1-(1-enyl-palmitoyl)-2-linoleoyl-GPC (P-16:0/18:2)*	Lipid	Plasmalogen	0.06	0.21	2.8e-08	0.038	T	A	-0.0862106	0.00769239	0.0323457	0	-0.0862106	2
1	223812936	rs79263940:223812936:G:A	intronic	CAPN8	M52677	C100009069	939	Atopic/contact dermatitis due to other or unspecified	1-(1-enyl-palmitoyl)-2-linoleoyl-GPE (P-16:0/18:2)*	Lipid	Plasmalogen	0.079	-0.2	5.9e-09	0.034	A	G	-0.0561535	0.167277	0.0406616	0	-0.0561535	4
11	61605215	rs2072114:61605215:A:G	intronic	FADS2	M52677	C100009069	939	Atopic/contact dermatitis due to other or unspecified	1-(1-enyl-palmitoyl)-2-linoleoyl-GPE (P-16:0/18:2)*	Lipid	Plasmalogen	0.29	0.21	1.2e-25	0.02	G	A	0.111828	0.00615662	0.0408226	0	0.111828	4
11	61635294	rs174623:61635294:G:A	downstream	FADS2	M52677	C100009069	939	Atopic/contact dermatitis due to other or unspecified	1-(1-enyl-palmitoyl)-2-linoleoyl-GPE (P-16:0/18:2)*	Lipid	Plasmalogen	0.44	-0.13	7.9e-13	0.019	G	A	0.0537777	0.0589031	0.028469	1	-0.0537777	4
19	55737798	rs56154925:55737798:C:T	downstream	TMEM86B	M52677	C100009069	939	Atopic/contact dermatitis due to other or unspecified	1-(1-enyl-palmitoyl)-2-linoleoyl-GPE (P-16:0/18:2)*	Lipid	Plasmalogen	0.15	-0.19	4.4e-14	0.025	T	C	-0.122046	0.00107185	0.0373119	0	-0.122046	4
1	223812936	rs79263940:223812936:G:A	intronic	CAPN8	M52677	C100009069	288.1	Decreased white blood cell count	1-(1-enyl-palmitoyl)-2-linoleoyl-GPE (P-16:0/18:2)*	Lipid	Plasmalogen	0.079	-0.2	5.9e-09	0.034	A	G	-0.0966012	0.0524187	0.0498027	0	-0.0966012	4
11	61605215	rs2072114:61605215:A:G	intronic	FADS2	M52677	C100009069	288.1	Decreased white blood cell count	1-(1-enyl-palmitoyl)-2-linoleoyl-GPE (P-16:0/18:2)*	Lipid	Plasmalogen	0.29	0.21	1.2e-25	0.02	G	A	0.144152	0.00305286	0.048661	0	0.144152	4
11	61635294	rs174623:61635294:G:A	downstream	FADS2	M52677	C100009069	288.1	Decreased white blood cell count	1-(1-enyl-palmitoyl)-2-linoleoyl-GPE (P-16:0/18:2)*	Lipid	Plasmalogen	0.44	-0.13	7.9e-13	0.019	G	A	0.0845433	0.0135504	0.0342427	1	-0.0845433	4
19	55737798	rs56154925:55737798:C:T	downstream	TMEM86B	M52677	C100009069	288.1	Decreased white blood cell count	1-(1-enyl-palmitoyl)-2-linoleoyl-GPE (P-16:0/18:2)*	Lipid	Plasmalogen	0.15	-0.19	4.4e-14	0.025	T	C	-0.139571	0.00197579	0.0451125	0	-0.139571	4
14	67966599	rs10873201:67966599:C:T	intronic	TMEM229B	M52478	C100009007	272.11	Hypercholesterolemia	1-(1-enyl-palmitoyl)-2-oleoyl-GPC (P-16:0/18:1)*	Lipid	Plasmalogen	0.44	-0.13	6.3e-12	0.019	T	C	0.0529624	0.00857309	0.0201482	0	0.0529624	3
15	58676032	rs80123226:58676032:A:T	intergenic	AQP9(dist=197922),LIPC(dist=48143)	M52478	C100009007	272.11	Hypercholesterolemia	1-(1-enyl-palmitoyl)-2-oleoyl-GPC (P-16:0/18:1)*	Lipid	Plasmalogen	0.34	0.12	2.2e-09	0.019	T	A	-0.0376998	0.0886402	0.0221421	0	-0.0376998	3
16	56993161	rs12149545:56993161:G:A	intergenic	HERPUD1(dist=15368),CETP(dist=2674)	M52478	C100009007	272.11	Hypercholesterolemia	1-(1-enyl-palmitoyl)-2-oleoyl-GPC (P-16:0/18:1)*	Lipid	Plasmalogen	0.27	0.12	9.3e-09	0.02	A	G	-0.0933255	2.25e-05	0.0220206	0	-0.0933255	3
11	61623140	rs174601:61623140:C:T	intronic	FADS2	M52474	C100002875	789	Nausea and vomiting	1-(1-enyl-palmitoyl)-GPC (P-16:0)*	Lipid	Lysoplasmalogen	0.43	-0.13	2.2e-12	0.019	T	C	0.0612362	0.000568441	0.01777	0	0.0612362	2
14	67966599	rs10873201:67966599:C:T	intronic	TMEM229B	M52474	C100002875	789	Nausea and vomiting	1-(1-enyl-palmitoyl)-GPC (P-16:0)*	Lipid	Lysoplasmalogen	0.44	-0.12	7.1e-11	0.018	T	C	0.0324575	0.0587418	0.0171701	0	0.0324575	2
11	60899767	rs754382:60899767:A:G	exonic	VPS37C	M52613	C100008918	789	Nausea and vomiting	1-(1-enyl-stearoyl)-2-arachidonoyl-GPC (P-18:0/20:4)	Lipid	Plasmalogen	0.26	0.12	2.4e-09	0.021	A	G	0.0375366	0.0362036	0.0179181	1	-0.0375366	8
11	61416913	rs1615089:61416913:T:A	intergenic	RPLP0P2(dist=9992),DAGLA(dist=30992)	M52613	C100008918	789	Nausea and vomiting	1-(1-enyl-stearoyl)-2-arachidonoyl-GPC (P-18:0/20:4)	Lipid	Plasmalogen	0.17	0.16	8.3e-11	0.025	A	T	-0.0164516	0.579574	0.0296952	0	-0.0164516	8
11	61588305	rs174564:61588305:A:G	intronic	FADS2	M52613	C100008918	789	Nausea and vomiting	1-(1-enyl-stearoyl)-2-arachidonoyl-GPC (P-18:0/20:4)	Lipid	Plasmalogen	0.42	-0.41	1.9e-109	0.018	G	A	0.0612926	0.000695473	0.0180721	0	0.0612926	8
11	61645892	rs174452:61645892:G:A	intronic	FADS3	M52613	C100008918	789	Nausea and vomiting	1-(1-enyl-stearoyl)-2-arachidonoyl-GPC (P-18:0/20:4)	Lipid	Plasmalogen	0.11	0.19	1.8e-10	0.03	A	G	-0.0289305	0.310799	0.0285437	0	-0.0289305	8
11	61653164	rs116139751:61653164:C:T	intronic	FADS3	M52613	C100008918	789	Nausea and vomiting	1-(1-enyl-stearoyl)-2-arachidonoyl-GPC (P-18:0/20:4)	Lipid	Plasmalogen	0.11	-0.23	1.2e-14	0.03	T	C	0.0229545	0.512927	0.0350797	0	0.0229545	8
11	61667879	rs112543847:61667879:C:T	intronic	RAB3IL1	M52613	C100008918	789	Nausea and vomiting	1-(1-enyl-stearoyl)-2-arachidonoyl-GPC (P-18:0/20:4)	Lipid	Plasmalogen	0.083	-0.2	3.3e-09	0.033	T	C	0.0456615	0.226454	0.0377483	0	0.0456615	8
11	61827072	rs58451960:61827072:C:T	intergenic	FTH1(dist=91940),INCENP(dist=64373)	M52613	C100008918	789	Nausea and vomiting	1-(1-enyl-stearoyl)-2-arachidonoyl-GPC (P-18:0/20:4)	Lipid	Plasmalogen	0.13	-0.15	1.5e-08	0.027	T	C	0.00261657	0.910867	0.0233865	0	0.00261657	8
14	67964688	rs12878807:67964688:T:A	intronic	TMEM229B	M52613	C100008918	789	Nausea and vomiting	1-(1-enyl-stearoyl)-2-arachidonoyl-GPC (P-18:0/20:4)	Lipid	Plasmalogen	0.45	-0.14	1.2e-14	0.019	A	T	0.0288984	0.0923631	0.0171726	0	0.0288984	8
11	61619829	rs174594:61619829:C:A	intronic	FADS2	M52475	C100008999	555.1	Regional enteritis	1-(1-enyl-stearoyl)-2-arachidonoyl-GPE (P-18:0/20:4)*	Lipid	Plasmalogen	0.43	0.21	1.6e-29	0.018	C	A	0.146055	0.000110162	0.03777	1	-0.146055	1
11	61605215	rs2072114:61605215:A:G	intronic	FADS2	M52748	C100009225	288.1	Decreased white blood cell count	1-(1-enyl-stearoyl)-2-linoleoyl-GPE (P-18:0/18:2)*	Lipid	Plasmalogen	0.29	0.23	1.2e-29	0.02	G	A	0.144152	0.00305286	0.048661	0	0.144152	2
11	61635294	rs174623:61635294:G:A	downstream	FADS2	M52748	C100009225	288.1	Decreased white blood cell count	1-(1-enyl-stearoyl)-2-linoleoyl-GPE (P-18:0/18:2)*	Lipid	Plasmalogen	0.44	-0.14	4e-13	0.019	G	A	0.0845433	0.0135504	0.0342427	1	-0.0845433	2
1	63086001	rs12239737:63086001:T:A	intronic	DOCK7	M34214	C100001654	514.1	Abnormal results of function study of pulmonary system	1-arachidonoyl-GPI (20:4)*	Lipid	Lysolipid	0.23	-0.13	6.1e-09	0.022	A	T	0.0997548	0.483048	0.142223	0	0.0997548	6
11	61589481	rs28456:61589481:A:G	intronic	FADS2	M34214	C100001654	514.1	Abnormal results of function study of pulmonary system	1-arachidonoyl-GPI (20:4)*	Lipid	Lysolipid	0.4	-0.16	9.4e-19	0.019	G	A	0.276919	0.048689	0.140476	0	0.276919	6
12	20999081	rs975656:20999081:C:T	intronic	SLCO1B3	M34214	C100001654	514.1	Abnormal results of function study of pulmonary system	1-arachidonoyl-GPI (20:4)*	Lipid	Lysolipid	0.27	-0.13	1.5e-09	0.021	C	T	-0.259594	0.2226	0.212844	1	0.259594	6
12	21317791	rs4149032:21317791:C:T	intronic	SLCO1B1	M34214	C100001654	514.1	Abnormal results of function study of pulmonary system	1-arachidonoyl-GPI (20:4)*	Lipid	Lysolipid	0.3	-0.11	7.9e-09	0.02	T	C	0.46884	0.000545543	0.135608	0	0.46884	6
12	21331549	rs4149056:21331549:T:C	exonic	SLCO1B1	M34214	C100001654	514.1	Abnormal results of function study of pulmonary system	1-arachidonoyl-GPI (20:4)*	Lipid	Lysolipid	0.22	0.2	3.4e-19	0.022	C	T	-0.278885	0.175301	0.205764	0	-0.278885	6
19	54677189	rs8736:54677189:C:T	UTR3	MBOAT7	M34214	C100001654	514.1	Abnormal results of function study of pulmonary system	1-arachidonoyl-GPI (20:4)*	Lipid	Lysolipid	0.39	0.2	1.2e-27	0.018	T	C	0.276616	0.0453248	0.138195	1	-0.276616	6
11	61593816	rs174568:61593816:C:T	intronic	FADS2	M33871	C100001553	555	Inflammatory bowel disease and other gastroenteritis and colitis	1-dihomo-linoleoyl-GPC (20:2)*	Lipid	Lysolipid	0.42	0.25	3.6e-41	0.018	T	C	0.136295	0.000137422	0.035748	0	0.136295	1
11	61593816	rs174568:61593816:C:T	intronic	FADS2	M33871	C100001553	555.1	Regional enteritis	1-dihomo-linoleoyl-GPC (20:2)*	Lipid	Lysolipid	0.42	0.25	3.6e-41	0.018	T	C	0.157371	3.95e-05	0.0382869	0	0.157371	1
12	21343833	rs73079476:21343833:A:C	intronic	SLCO1B1	M45951	C100005350	571.5	Other chronic nonalcoholic liver disease	1-linolenoyl-GPC (18:3)*	Lipid	Lysolipid	0.22	0.13	4.7e-09	0.022	C	A	0.0205377	0.567791	0.0359546	0	0.0205377	2
8	126500031	rs28601761:126500031:C:G	intergenic	TRIB1(dist=49384),LINC00861(dist=434736)	M45951	C100005350	571.5	Other chronic nonalcoholic liver disease	1-linolenoyl-GPC (18:3)*	Lipid	Lysolipid	0.42	-0.11	9.8e-09	0.018	G	C	-0.123326	4.05e-06	0.0267592	0	-0.123326	2
11	61593005	rs174567:61593005:A:G	intronic	FADS2	M52710	C100009131	555	Inflammatory bowel disease and other gastroenteritis and colitis	1-linoleoyl-2-arachidonoyl-GPC (18:2/20:4n6)*	Lipid	Phospholipid Metabolism	0.42	-0.24	8.9e-30	0.021	G	A	0.136993	0.000122327	0.0356616	0	0.136993	1
11	61593005	rs174567:61593005:A:G	intronic	FADS2	M52710	C100009131	555.1	Regional enteritis	1-linoleoyl-2-arachidonoyl-GPC (18:2/20:4n6)*	Lipid	Phospholipid Metabolism	0.42	-0.24	8.9e-30	0.021	G	A	0.163156	1.92e-05	0.0381718	0	0.163156	1
11	61409247	rs1692116:61409247:G:A	intergenic	RPLP0P2(dist=2326),DAGLA(dist=38658)	M36594	C100001778	574	Cholelithiasis and cholecystitis	1-linoleoyl-GPI (18:2)*	Lipid	Lysolipid	0.2	-0.14	1.5e-09	0.023	A	G	-0.0573844	0.262096	0.0511698	0	-0.0573844	7
11	61581368	rs174557:61581368:A:G	intronic	FADS1	M36594	C100001778	574	Cholelithiasis and cholecystitis	1-linoleoyl-GPI (18:2)*	Lipid	Lysolipid	0.4	0.21	4.6e-28	0.019	G	A	0.0641572	0.0822054	0.0369116	0	0.0641572	7
11	61653164	rs116139751:61653164:C:T	intronic	FADS3	M36594	C100001778	574	Cholelithiasis and cholecystitis	1-linoleoyl-GPI (18:2)*	Lipid	Lysolipid	0.11	0.17	5.8e-09	0.029	T	C	0.0628433	0.354717	0.0679052	0	0.0628433	7
12	21368797	rs2900478:21368797:T:A	intronic	SLCO1B1	M36594	C100001778	574	Cholelithiasis and cholecystitis	1-linoleoyl-GPI (18:2)*	Lipid	Lysolipid	0.24	0.16	2.1e-13	0.022	A	T	0.0362644	0.426938	0.0456485	0	0.0362644	7
19	54549557	rs11665958:54549557:T:C	intronic	VSTM1	M36594	C100001778	574	Cholelithiasis and cholecystitis	1-linoleoyl-GPI (18:2)*	Lipid	Lysolipid	0.5	0.11	2.3e-09	0.018	T	C	-0.0164526	0.630232	0.0341764	1	0.0164526	7
19	54611734	rs75622830:54611734:A:G	intronic	TFPT	M36594	C100001778	574	Cholelithiasis and cholecystitis	1-linoleoyl-GPI (18:2)*	Lipid	Lysolipid	0.097	0.17	4e-08	0.03	G	A	0.176354	0.00119641	0.0544334	0	0.176354	7
19	54677189	rs8736:54677189:C:T	UTR3	MBOAT7	M36594	C100001778	574	Cholelithiasis and cholecystitis	1-linoleoyl-GPI (18:2)*	Lipid	Lysolipid	0.39	-0.28	6.4e-53	0.018	T	C	0.0658346	0.0601682	0.035029	1	-0.0658346	7
11	116623213	rs66505542:116623213:TA:T	intronic	BUD13	M27447	C100001040	272	Disorders of lipoid metabolism	1-linoleoylglycerol (18:2)	Lipid	Monoacylglycerol	0.17	-0.16	3.4e-11	0.024	TA	T	0.116289	6.35e-09	0.0200245	1	-0.116289	1
11	116623213	rs66505542:116623213:TA:T	intronic	BUD13	M27447	C100001040	272.12	Hyperglyceridemia	1-linoleoylglycerol (18:2)	Lipid	Monoacylglycerol	0.17	-0.16	3.4e-11	0.024	TA	T	0.610928	5.56e-15	0.0781875	1	-0.610928	1
11	116623213	rs66505542:116623213:TA:T	intronic	BUD13	M27447	C100001040	272.1	Hyperlipidemia	1-linoleoylglycerol (18:2)	Lipid	Monoacylglycerol	0.17	-0.16	3.4e-11	0.024	TA	T	0.116885	2.72e-09	0.0196524	1	-0.116885	1
11	116623213	rs66505542:116623213:TA:T	intronic	BUD13	M27447	C100001040	272.13	Mixed hyperlipidemia	1-linoleoylglycerol (18:2)	Lipid	Monoacylglycerol	0.17	-0.16	3.4e-11	0.024	TA	T	0.124675	2.52e-07	0.024181	1	-0.124675	1
11	61604782	rs2524299:61604782:A:T	intronic	FADS2	M52453	C100008981	288.1	Decreased white blood cell count	1-oleoyl-2-linoleoyl-GPC (18:1/18:2)*	Lipid	Phospholipid Metabolism	0.29	0.37	9.5e-29	0.033	T	A	0.140058	0.00438462	0.0491578	0	0.140058	2
11	61628492	rs174613:61628492:G:A	intronic	FADS2	M52453	C100008981	288.1	Decreased white blood cell count	1-oleoyl-2-linoleoyl-GPC (18:1/18:2)*	Lipid	Phospholipid Metabolism	0.44	0.23	6.1e-14	0.03	A	G	0.0823355	0.0157308	0.0340909	0	0.0823355	2
11	61604782	rs2524299:61604782:A:T	intronic	FADS2	M52453	C100008981	555	Inflammatory bowel disease and other gastroenteritis and colitis	1-oleoyl-2-linoleoyl-GPC (18:1/18:2)*	Lipid	Phospholipid Metabolism	0.29	0.37	9.5e-29	0.033	T	A	0.185325	0.000172492	0.049338	0	0.185325	2
11	61628492	rs174613:61628492:G:A	intronic	FADS2	M52453	C100008981	555	Inflammatory bowel disease and other gastroenteritis and colitis	1-oleoyl-2-linoleoyl-GPC (18:1/18:2)*	Lipid	Phospholipid Metabolism	0.44	0.23	6.1e-14	0.03	A	G	0.0540999	0.115557	0.0343763	0	0.0540999	2
11	61603358	rs2727271:61603358:A:T	intronic	FADS2	M52683	C100009075	288.1	Decreased white blood cell count	1-palmitoleoyl-2-linoleoyl-GPC (16:1/18:2)*	Lipid	Phospholipid Metabolism	0.29	0.34	2.5e-24	0.033	T	A	0.14779	0.00293103	0.0496788	0	0.14779	2
11	61627811	rs174609:61627811:T:C	intronic	FADS2	M52683	C100009075	288.1	Decreased white blood cell count	1-palmitoleoyl-2-linoleoyl-GPC (16:1/18:2)*	Lipid	Phospholipid Metabolism	0.44	0.24	1.6e-14	0.031	C	T	0.0834676	0.0140373	0.0339796	0	0.0834676	2
11	61603358	rs2727271:61603358:A:T	intronic	FADS2	M52683	C100009075	555	Inflammatory bowel disease and other gastroenteritis and colitis	1-palmitoleoyl-2-linoleoyl-GPC (16:1/18:2)*	Lipid	Phospholipid Metabolism	0.29	0.34	2.5e-24	0.033	T	A	0.189653	0.000144868	0.0499133	0	0.189653	2
11	61627811	rs174609:61627811:T:C	intronic	FADS2	M52683	C100009075	555	Inflammatory bowel disease and other gastroenteritis and colitis	1-palmitoleoyl-2-linoleoyl-GPC (16:1/18:2)*	Lipid	Phospholipid Metabolism	0.44	0.24	1.6e-14	0.031	C	T	0.0526114	0.124712	0.0342698	0	0.0526114	2
2	27730940	rs1260326:27730940:T:C	exonic	GCKR	M52470	C100008984	571	Chronic liver disease and cirrhosis	1-palmitoyl-2-palmitoleoyl-GPC (16:0/16:1)*	Lipid	Phospholipid Metabolism	0.37	-0.11	1e-08	0.019	T	C	0.047103	0.088262	0.027631	1	-0.047103	2
8	126484276	rs4336630:126484276:T:G	intergenic	TRIB1(dist=33629),LINC00861(dist=450491)	M52470	C100008984	571	Chronic liver disease and cirrhosis	1-palmitoyl-2-palmitoleoyl-GPC (16:0/16:1)*	Lipid	Phospholipid Metabolism	0.35	-0.13	4.6e-11	0.019	T	G	0.0981425	0.00041134	0.0277804	1	-0.0981425	2
2	27730940	rs1260326:27730940:T:C	exonic	GCKR	M52470	C100008984	272	Disorders of lipoid metabolism	1-palmitoyl-2-palmitoleoyl-GPC (16:0/16:1)*	Lipid	Phospholipid Metabolism	0.37	-0.11	1e-08	0.019	T	C	0.0651134	1.3e-05	0.0149349	1	-0.0651134	2
8	126484276	rs4336630:126484276:T:G	intergenic	TRIB1(dist=33629),LINC00861(dist=450491)	M52470	C100008984	272	Disorders of lipoid metabolism	1-palmitoyl-2-palmitoleoyl-GPC (16:0/16:1)*	Lipid	Phospholipid Metabolism	0.35	-0.13	4.6e-11	0.019	T	G	0.0478564	0.00156582	0.0151345	1	-0.0478564	2
2	27730940	rs1260326:27730940:T:C	exonic	GCKR	M52470	C100008984	274.1	Gout	1-palmitoyl-2-palmitoleoyl-GPC (16:0/16:1)*	Lipid	Phospholipid Metabolism	0.37	-0.11	1e-08	0.019	T	C	0.227144	3.15e-12	0.032585	1	-0.227144	2
8	126484276	rs4336630:126484276:T:G	intergenic	TRIB1(dist=33629),LINC00861(dist=450491)	M52470	C100008984	274.1	Gout	1-palmitoyl-2-palmitoleoyl-GPC (16:0/16:1)*	Lipid	Phospholipid Metabolism	0.35	-0.13	4.6e-11	0.019	T	G	-0.00636622	0.84909	0.0334582	1	0.00636622	2
2	27730940	rs1260326:27730940:T:C	exonic	GCKR	M52470	C100008984	274	Gout and other crystal arthropathies	1-palmitoyl-2-palmitoleoyl-GPC (16:0/16:1)*	Lipid	Phospholipid Metabolism	0.37	-0.11	1e-08	0.019	T	C	0.237062	5.48e-12	0.0343945	1	-0.237062	2
8	126484276	rs4336630:126484276:T:G	intergenic	TRIB1(dist=33629),LINC00861(dist=450491)	M52470	C100008984	274	Gout and other crystal arthropathies	1-palmitoyl-2-palmitoleoyl-GPC (16:0/16:1)*	Lipid	Phospholipid Metabolism	0.35	-0.13	4.6e-11	0.019	T	G	-0.00561976	0.873637	0.0353356	1	0.00561976	2
2	27730940	rs1260326:27730940:T:C	exonic	GCKR	M52470	C100008984	272.11	Hypercholesterolemia	1-palmitoyl-2-palmitoleoyl-GPC (16:0/16:1)*	Lipid	Phospholipid Metabolism	0.37	-0.11	1e-08	0.019	T	C	0.0796703	0.00013077	0.0208288	1	-0.0796703	2
8	126484276	rs4336630:126484276:T:G	intergenic	TRIB1(dist=33629),LINC00861(dist=450491)	M52470	C100008984	272.11	Hypercholesterolemia	1-palmitoyl-2-palmitoleoyl-GPC (16:0/16:1)*	Lipid	Phospholipid Metabolism	0.35	-0.13	4.6e-11	0.019	T	G	0.0372187	0.0784448	0.0211491	1	-0.0372187	2
2	27730940	rs1260326:27730940:T:C	exonic	GCKR	M52470	C100008984	272.12	Hyperglyceridemia	1-palmitoyl-2-palmitoleoyl-GPC (16:0/16:1)*	Lipid	Phospholipid Metabolism	0.37	-0.11	1e-08	0.019	T	C	0.205615	0.00241996	0.06779	1	-0.205615	2
8	126484276	rs4336630:126484276:T:G	intergenic	TRIB1(dist=33629),LINC00861(dist=450491)	M52470	C100008984	272.12	Hyperglyceridemia	1-palmitoyl-2-palmitoleoyl-GPC (16:0/16:1)*	Lipid	Phospholipid Metabolism	0.35	-0.13	4.6e-11	0.019	T	G	0.216618	0.00141318	0.0678628	1	-0.216618	2
2	27730940	rs1260326:27730940:T:C	exonic	GCKR	M52470	C100008984	272.1	Hyperlipidemia	1-palmitoyl-2-palmitoleoyl-GPC (16:0/16:1)*	Lipid	Phospholipid Metabolism	0.37	-0.11	1e-08	0.019	T	C	0.0657316	7.3e-06	0.0146559	1	-0.0657316	2
8	126484276	rs4336630:126484276:T:G	intergenic	TRIB1(dist=33629),LINC00861(dist=450491)	M52470	C100008984	272.1	Hyperlipidemia	1-palmitoyl-2-palmitoleoyl-GPC (16:0/16:1)*	Lipid	Phospholipid Metabolism	0.35	-0.13	4.6e-11	0.019	T	G	0.0442944	0.00283862	0.0148411	1	-0.0442944	2
2	27730940	rs1260326:27730940:T:C	exonic	GCKR	M52470	C100008984	272.13	Mixed hyperlipidemia	1-palmitoyl-2-palmitoleoyl-GPC (16:0/16:1)*	Lipid	Phospholipid Metabolism	0.37	-0.11	1e-08	0.019	T	C	0.0721532	7.22e-05	0.018178	1	-0.0721532	2
8	126484276	rs4336630:126484276:T:G	intergenic	TRIB1(dist=33629),LINC00861(dist=450491)	M52470	C100008984	272.13	Mixed hyperlipidemia	1-palmitoyl-2-palmitoleoyl-GPC (16:0/16:1)*	Lipid	Phospholipid Metabolism	0.35	-0.13	4.6e-11	0.019	T	G	0.0470935	0.0106041	0.018429	1	-0.0470935	2
2	27730940	rs1260326:27730940:T:C	exonic	GCKR	M52470	C100008984	571.5	Other chronic nonalcoholic liver disease	1-palmitoyl-2-palmitoleoyl-GPC (16:0/16:1)*	Lipid	Phospholipid Metabolism	0.37	-0.11	1e-08	0.019	T	C	0.0539862	0.0437695	0.0267772	1	-0.0539862	2
8	126484276	rs4336630:126484276:T:G	intergenic	TRIB1(dist=33629),LINC00861(dist=450491)	M52470	C100008984	571.5	Other chronic nonalcoholic liver disease	1-palmitoyl-2-palmitoleoyl-GPC (16:0/16:1)*	Lipid	Phospholipid Metabolism	0.35	-0.13	4.6e-11	0.019	T	G	0.110127	4.17e-05	0.0268745	1	-0.110127	2
1	62960575	rs1168040:62960575:T:C	intronic	DOCK7	M52616	C100008921	272	Disorders of lipoid metabolism	1-palmitoyl-2-stearoyl-GPC (16:0/18:0)	Lipid	Phospholipid Metabolism	0.24	0.12	2.2e-08	0.022	T	C	-0.0302221	0.0498741	0.0154113	1	0.0302221	3
11	116648917	rs964184:116648917:G:C	UTR3	ZPR1	M52616	C100008921	272	Disorders of lipoid metabolism	1-palmitoyl-2-stearoyl-GPC (16:0/18:0)	Lipid	Phospholipid Metabolism	0.13	-0.2	3e-13	0.027	G	C	0.131476	1.72e-10	0.0205935	1	-0.131476	3
11	61573684	rs174551:61573684:T:C	intronic	FADS1	M52616	C100008921	272	Disorders of lipoid metabolism	1-palmitoyl-2-stearoyl-GPC (16:0/18:0)	Lipid	Phospholipid Metabolism	0.42	-0.17	1.4e-19	0.019	C	T	-0.0185775	0.226386	0.0153571	0	-0.0185775	3
1	62960575	rs1168040:62960575:T:C	intronic	DOCK7	M52616	C100008921	272.11	Hypercholesterolemia	1-palmitoyl-2-stearoyl-GPC (16:0/18:0)	Lipid	Phospholipid Metabolism	0.24	0.12	2.2e-08	0.022	T	C	-0.0553267	0.0103778	0.0215869	1	0.0553267	3
11	116648917	rs964184:116648917:G:C	UTR3	ZPR1	M52616	C100008921	272.11	Hypercholesterolemia	1-palmitoyl-2-stearoyl-GPC (16:0/18:0)	Lipid	Phospholipid Metabolism	0.13	-0.2	3e-13	0.027	G	C	0.100234	0.000512878	0.0288529	1	-0.100234	3
11	61573684	rs174551:61573684:T:C	intronic	FADS1	M52616	C100008921	272.11	Hypercholesterolemia	1-palmitoyl-2-stearoyl-GPC (16:0/18:0)	Lipid	Phospholipid Metabolism	0.42	-0.17	1.4e-19	0.019	C	T	-0.0216088	0.313967	0.0214596	0	-0.0216088	3
1	62960575	rs1168040:62960575:T:C	intronic	DOCK7	M52616	C100008921	272.12	Hyperglyceridemia	1-palmitoyl-2-stearoyl-GPC (16:0/18:0)	Lipid	Phospholipid Metabolism	0.24	0.12	2.2e-08	0.022	T	C	-0.110083	0.124685	0.0716963	1	0.110083	3
11	116648917	rs964184:116648917:G:C	UTR3	ZPR1	M52616	C100008921	272.12	Hyperglyceridemia	1-palmitoyl-2-stearoyl-GPC (16:0/18:0)	Lipid	Phospholipid Metabolism	0.13	-0.2	3e-13	0.027	G	C	0.625767	4.48e-15	0.0798092	1	-0.625767	3
11	61573684	rs174551:61573684:T:C	intronic	FADS1	M52616	C100008921	272.12	Hyperglyceridemia	1-palmitoyl-2-stearoyl-GPC (16:0/18:0)	Lipid	Phospholipid Metabolism	0.42	-0.17	1.4e-19	0.019	C	T	0.0941368	0.172125	0.0689468	0	0.0941368	3
1	62960575	rs1168040:62960575:T:C	intronic	DOCK7	M52616	C100008921	272.1	Hyperlipidemia	1-palmitoyl-2-stearoyl-GPC (16:0/18:0)	Lipid	Phospholipid Metabolism	0.24	0.12	2.2e-08	0.022	T	C	-0.0303788	0.0445505	0.0151223	1	0.0303788	3
11	116648917	rs964184:116648917:G:C	UTR3	ZPR1	M52616	C100008921	272.1	Hyperlipidemia	1-palmitoyl-2-stearoyl-GPC (16:0/18:0)	Lipid	Phospholipid Metabolism	0.13	-0.2	3e-13	0.027	G	C	0.134758	2.52e-11	0.0201984	1	-0.134758	3
11	61573684	rs174551:61573684:T:C	intronic	FADS1	M52616	C100008921	272.1	Hyperlipidemia	1-palmitoyl-2-stearoyl-GPC (16:0/18:0)	Lipid	Phospholipid Metabolism	0.42	-0.17	1.4e-19	0.019	C	T	-0.0155797	0.300816	0.0150572	0	-0.0155797	3
1	62960575	rs1168040:62960575:T:C	intronic	DOCK7	M52616	C100008921	272.13	Mixed hyperlipidemia	1-palmitoyl-2-stearoyl-GPC (16:0/18:0)	Lipid	Phospholipid Metabolism	0.24	0.12	2.2e-08	0.022	T	C	-0.0388126	0.0391336	0.0188154	1	0.0388126	3
11	116648917	rs964184:116648917:G:C	UTR3	ZPR1	M52616	C100008921	272.13	Mixed hyperlipidemia	1-palmitoyl-2-stearoyl-GPC (16:0/18:0)	Lipid	Phospholipid Metabolism	0.13	-0.2	3e-13	0.027	G	C	0.145882	4.11e-09	0.0248108	1	-0.145882	3
11	61573684	rs174551:61573684:T:C	intronic	FADS1	M52616	C100008921	272.13	Mixed hyperlipidemia	1-palmitoyl-2-stearoyl-GPC (16:0/18:0)	Lipid	Phospholipid Metabolism	0.42	-0.17	1.4e-19	0.019	C	T	-0.00565094	0.762143	0.0186712	0	-0.00565094	3
1	62960575	rs1168040:62960575:T:C	intronic	DOCK7	M52616	C100008921	598.9	Other nonspecific findings on examination of urine	1-palmitoyl-2-stearoyl-GPC (16:0/18:0)	Lipid	Phospholipid Metabolism	0.24	0.12	2.2e-08	0.022	T	C	-0.218904	0.0104719	0.0855146	1	0.218904	3
11	116648917	rs964184:116648917:G:C	UTR3	ZPR1	M52616	C100008921	598.9	Other nonspecific findings on examination of urine	1-palmitoyl-2-stearoyl-GPC (16:0/18:0)	Lipid	Phospholipid Metabolism	0.13	-0.2	3e-13	0.027	G	C	0.30063	0.00248953	0.0993951	1	-0.30063	3
11	61573684	rs174551:61573684:T:C	intronic	FADS1	M52616	C100008921	598.9	Other nonspecific findings on examination of urine	1-palmitoyl-2-stearoyl-GPC (16:0/18:0)	Lipid	Phospholipid Metabolism	0.42	-0.17	1.4e-19	0.019	C	T	-0.108173	0.193645	0.0832187	0	-0.108173	3
11	116623213	rs66505542:116623213:TA:T	intronic	BUD13	M52466	C100008992	395.2	Nonrheumatic aortic valve disorders	1-stearoyl-2-docosahexaenoyl-GPE (18:0/22:6)*	Lipid	Phospholipid Metabolism	0.17	-0.14	3.4e-09	0.024	TA	T	-0.00337971	0.934815	0.0413178	1	0.00337971	14
15	57886754	rs35770151:57886754:T:C	intronic	GCOM1,MYZAP	M52466	C100008992	395.2	Nonrheumatic aortic valve disorders	1-stearoyl-2-docosahexaenoyl-GPE (18:0/22:6)*	Lipid	Phospholipid Metabolism	0.29	0.11	4.2e-08	0.02	C	T	0.0278486	0.387033	0.0321933	0	0.0278486	14
15	58485682	rs12900815:58485682:C:T	intergenic	AQP9(dist=7572),LIPC(dist=238493)	M52466	C100008992	395.2	Nonrheumatic aortic valve disorders	1-stearoyl-2-docosahexaenoyl-GPE (18:0/22:6)*	Lipid	Phospholipid Metabolism	0.31	0.19	6.2e-21	0.02	T	C	0.0108905	0.73862	0.032631	0	0.0108905	14
15	58586129	rs1318175:58586129:C:T	intergenic	AQP9(dist=108019),LIPC(dist=138046)	M52466	C100008992	395.2	Nonrheumatic aortic valve disorders	1-stearoyl-2-docosahexaenoyl-GPE (18:0/22:6)*	Lipid	Phospholipid Metabolism	0.17	-0.15	1.5e-09	0.024	T	C	0.0301994	0.445746	0.0396104	0	0.0301994	14
15	58590621	rs1711041:58590621:G:T	intergenic	AQP9(dist=112511),LIPC(dist=133554)	M52466	C100008992	395.2	Nonrheumatic aortic valve disorders	1-stearoyl-2-docosahexaenoyl-GPE (18:0/22:6)*	Lipid	Phospholipid Metabolism	0.17	0.17	7.9e-12	0.024	T	G	0.019734	0.674226	0.0469453	0	0.019734	14
15	58628861	rs28599174:58628861:C:T	intergenic	AQP9(dist=150751),LIPC(dist=95314)	M52466	C100008992	395.2	Nonrheumatic aortic valve disorders	1-stearoyl-2-docosahexaenoyl-GPE (18:0/22:6)*	Lipid	Phospholipid Metabolism	0.13	-0.15	2.3e-08	0.028	T	C	-0.095034	0.0902036	0.0560894	0	-0.095034	14
15	58666087	rs479084:58666087:C:G	intergenic	AQP9(dist=187977),LIPC(dist=58088)	M52466	C100008992	395.2	Nonrheumatic aortic valve disorders	1-stearoyl-2-docosahexaenoyl-GPE (18:0/22:6)*	Lipid	Phospholipid Metabolism	0.34	-0.17	5.6e-19	0.019	G	C	-0.0318426	0.294288	0.0303624	0	-0.0318426	14
15	58678512	rs10468017:58678512:C:T	intergenic	AQP9(dist=200402),LIPC(dist=45663)	M52466	C100008992	395.2	Nonrheumatic aortic valve disorders	1-stearoyl-2-docosahexaenoyl-GPE (18:0/22:6)*	Lipid	Phospholipid Metabolism	0.33	0.41	7.9e-100	0.019	T	C	0.0790237	0.013247	0.0319011	0	0.0790237	14
15	58685037	rs72475921:58685037:T:G	intergenic	AQP9(dist=206927),LIPC(dist=39138)	M52466	C100008992	395.2	Nonrheumatic aortic valve disorders	1-stearoyl-2-docosahexaenoyl-GPE (18:0/22:6)*	Lipid	Phospholipid Metabolism	0.047	-0.34	4e-15	0.043	G	T	-0.14196	0.0152349	0.0584978	0	-0.14196	14
15	58722590	rs35980001:58722590:G:GC	NA	NA	M52466	C100008992	395.2	Nonrheumatic aortic valve disorders	1-stearoyl-2-docosahexaenoyl-GPE (18:0/22:6)*	Lipid	Phospholipid Metabolism	0.25	0.36	6.9e-68	0.021	GC	G	0.0955102	0.00761145	0.0357857	0	0.0955102	14
15	58983318	rs7179724:58983318:G:C	ncRNA_exonic	HSP90AB4P	M52466	C100008992	395.2	Nonrheumatic aortic valve disorders	1-stearoyl-2-docosahexaenoyl-GPE (18:0/22:6)*	Lipid	Phospholipid Metabolism	0.18	-0.14	1.7e-08	0.024	C	G	0.0370356	0.357801	0.0402792	0	0.0370356	14
15	58991738	rs8039013:58991738:A:G	intronic	ADAM10	M52466	C100008992	395.2	Nonrheumatic aortic valve disorders	1-stearoyl-2-docosahexaenoyl-GPE (18:0/22:6)*	Lipid	Phospholipid Metabolism	0.15	-0.17	4.2e-11	0.026	A	G	0.0152629	0.705981	0.0404503	1	-0.0152629	14
15	59427807	rs4775116:59427807:C:T	downstream	MYO1E	M52466	C100008992	395.2	Nonrheumatic aortic valve disorders	1-stearoyl-2-docosahexaenoyl-GPE (18:0/22:6)*	Lipid	Phospholipid Metabolism	0.28	0.14	2.5e-11	0.021	T	C	-0.0030988	0.926479	0.0335832	0	-0.0030988	14
2	27730940	rs1260326:27730940:T:C	exonic	GCKR	M52466	C100008992	395.2	Nonrheumatic aortic valve disorders	1-stearoyl-2-docosahexaenoyl-GPE (18:0/22:6)*	Lipid	Phospholipid Metabolism	0.37	-0.15	6.6e-14	0.019	T	C	0.0203319	0.502289	0.0303062	1	-0.0203319	14
11	61416913	rs1615089:61416913:T:A	intergenic	RPLP0P2(dist=9992),DAGLA(dist=30992)	M52738	C100009153	471	Nasal polyps	1-stearoyl-2-meadoyl-GPC (18:0/20:3n9)*	Lipid	Phospholipid Metabolism	0.17	0.14	4.6e-08	0.025	A	T	-0.0733656	0.671036	0.172737	0	-0.0733656	4
11	61592362	rs174566:61592362:A:G	intronic	FADS2	M52738	C100009153	471	Nasal polyps	1-stearoyl-2-meadoyl-GPC (18:0/20:3n9)*	Lipid	Phospholipid Metabolism	0.42	-0.36	4.2e-81	0.019	G	A	-0.364518	0.00105541	0.111292	0	-0.364518	4
11	61653164	rs116139751:61653164:C:T	intronic	FADS3	M52738	C100009153	471	Nasal polyps	1-stearoyl-2-meadoyl-GPC (18:0/20:3n9)*	Lipid	Phospholipid Metabolism	0.11	-0.24	5.1e-15	0.031	T	C	-0.362341	0.123586	0.235303	0	-0.362341	4
11	61726097	rs195160:61726097:T:G	intronic	BEST1	M52738	C100009153	471	Nasal polyps	1-stearoyl-2-meadoyl-GPC (18:0/20:3n9)*	Lipid	Phospholipid Metabolism	0.1	0.18	3.4e-09	0.031	T	G	-0.393032	0.0502673	0.200764	1	0.393032	4
11	61610750	rs174584:61610750:G:A	intronic	FADS2	M19132	C100000660	555.1	Regional enteritis	1,2-distearoyl-GPC (18:0/18:0)	Lipid	Phospholipid Metabolism	0.43	-0.18	3.2e-08	0.032	A	G	0.158003	3.29e-05	0.0380492	0	0.158003	1
10	5305891	rs77714023:5305891:G:A	intergenic	AKR1C4(dist=44981),UCN3(dist=101081)	M37482	C100002128	558	Noninfectious gastroenteritis	17alpha-hydroxypregnenolone 3-sulfate	Lipid	Steroid	0.14	0.25	3.7e-15	0.032	A	G	-0.209937	5.12e-05	0.051835	0	-0.209937	1
2	27748992	rs11336847:27748992:AT:A	intergenic	GCKR(dist=2442),C2orf16(dist=50397)	M52281	C100008928	272	Disorders of lipoid metabolism	2-hydroxybutyrate/2-hydroxyisobutyrate	Amino_Acid	Methionine Cysteine SAM and Taurine Metabolism	0.38	-0.11	2.6e-08	0.019	AT	A	0.0614713	3.36e-05	0.0148206	1	-0.0614713	1
2	27748992	rs11336847:27748992:AT:A	intergenic	GCKR(dist=2442),C2orf16(dist=50397)	M52281	C100008928	274.1	Gout	2-hydroxybutyrate/2-hydroxyisobutyrate	Amino_Acid	Methionine Cysteine SAM and Taurine Metabolism	0.38	-0.11	2.6e-08	0.019	AT	A	0.215539	2.51e-11	0.0323003	1	-0.215539	1
2	27748992	rs11336847:27748992:AT:A	intergenic	GCKR(dist=2442),C2orf16(dist=50397)	M52281	C100008928	274	Gout and other crystal arthropathies	2-hydroxybutyrate/2-hydroxyisobutyrate	Amino_Acid	Methionine Cysteine SAM and Taurine Metabolism	0.38	-0.11	2.6e-08	0.019	AT	A	0.224734	4.34e-11	0.0340913	1	-0.224734	1
2	27748992	rs11336847:27748992:AT:A	intergenic	GCKR(dist=2442),C2orf16(dist=50397)	M52281	C100008928	272.1	Hyperlipidemia	2-hydroxybutyrate/2-hydroxyisobutyrate	Amino_Acid	Methionine Cysteine SAM and Taurine Metabolism	0.38	-0.11	2.6e-08	0.019	AT	A	0.0621764	1.91e-05	0.0145442	1	-0.0621764	1
2	27748992	rs11336847:27748992:AT:A	intergenic	GCKR(dist=2442),C2orf16(dist=50397)	M52281	C100008928	272.13	Mixed hyperlipidemia	2-hydroxybutyrate/2-hydroxyisobutyrate	Amino_Acid	Methionine Cysteine SAM and Taurine Metabolism	0.38	-0.11	2.6e-08	0.019	AT	A	0.0702907	9.7e-05	0.0180317	1	-0.0702907	1
10	102075479	rs603424:102075479:G:A	intronic	PKD2L1	M47118	C100001561	411.8	\Other chronic ischemic heart disease, unspecified\	2-palmitoleoyl-GPC (16:1)*	Lipid	Lysolipid	0.11	-0.24	5.7e-09	0.041	A	G	0.146789	2.09e-05	0.0344961	0	0.146789	1
10	102075479	rs603424:102075479:G:A	intronic	PKD2L1	M47118	C100001561	411.4	Coronary atherosclerosis	2-palmitoleoyl-GPC (16:1)*	Lipid	Lysolipid	0.11	-0.24	5.7e-09	0.041	A	G	0.113472	5.78e-07	0.0227012	0	0.113472	1
10	102075479	rs603424:102075479:G:A	intronic	PKD2L1	M47118	C100001561	401.22	Hypertensive chronic kidney disease	2-palmitoleoyl-GPC (16:1)*	Lipid	Lysolipid	0.11	-0.24	5.7e-09	0.041	A	G	0.154085	2.16e-05	0.0362796	0	0.154085	1
10	102075479	rs603424:102075479:G:A	intronic	PKD2L1	M47118	C100001561	401.21	Hypertensive heart disease	2-palmitoleoyl-GPC (16:1)*	Lipid	Lysolipid	0.11	-0.24	5.7e-09	0.041	A	G	0.156705	1.45e-05	0.0361371	0	0.156705	1
6	25878361	rs566530:25878361:T:C	intergenic	SLC17A3(dist=3890),SLC17A2(dist=34623)	M31787	C100001178	275.1	Disorders of iron metabolism	3-carboxy-4-methyl-5-propyl-2-furanpropanoate (CMPF)	Lipid	Fatty Acid Dicarboxylate	0.41	-0.12	1.3e-09	0.019	T	C	-0.557702	1.02e-08	0.0973689	1	0.557702	1
11	2204726	rs7108915:2204726:T:C	intergenic	MIR4686(dist=10358),ASCL2(dist=85002)	M12017	C1342	53.1	Herpes zoster with nervous system complications	3-methoxytyrosine	Amino_Acid	Phenylalanine and Tyrosine Metabolism	0.2	0.19	1.6e-16	0.022	C	T	0.181204	0.17224	0.132743	0	0.181204	5
14	55359653	rs113585929:55359653:C:T	intronic	GCH1	M12017	C1342	53.1	Herpes zoster with nervous system complications	3-methoxytyrosine	Amino_Acid	Phenylalanine and Tyrosine Metabolism	0.11	-0.28	2.8e-22	0.029	T	C	-0.305549	0.145539	0.209931	0	-0.305549	5
22	19951271	rs4680:19951271:G:A	exonic	COMT	M12017	C1342	53.1	Herpes zoster with nervous system complications	3-methoxytyrosine	Amino_Acid	Phenylalanine and Tyrosine Metabolism	0.46	-0.1	4.3e-08	0.018	G	A	0.0900326	0.442498	0.117228	1	-0.0900326	5
6	25884664	rs1165170:25884664:A:C	intergenic	SLC17A3(dist=10193),SLC17A2(dist=28320)	M12017	C1342	53.1	Herpes zoster with nervous system complications	3-methoxytyrosine	Amino_Acid	Phenylalanine and Tyrosine Metabolism	0.22	-0.17	6.8e-14	0.022	A	C	0.353624	0.00354004	0.121251	1	-0.353624	5
7	50541554	rs17634771:50541554:G:C	intronic	DDC	M12017	C1342	53.1	Herpes zoster with nervous system complications	3-methoxytyrosine	Amino_Acid	Phenylalanine and Tyrosine Metabolism	0.076	0.21	6.8e-10	0.034	C	G	0.27673	0.104024	0.17023	0	0.27673	5
19	41353107	rs56113850:41353107:T:C	intronic	CYP2A6	M32445	C100001108	286.2	Encounter for long-term (current) use of anticoagulants	3-methylxanthine	Xenobiotics	Xanthine Metabolism	0.44	0.16	8.9e-18	0.018	T	C	0.0847547	0.000163122	0.0224798	1	-0.0847547	1
6	25829633	rs13200784:25829633:A:T	intronic	SLC17A1	M36099	C100001756	557.1	Celiac disease	4-ethylphenylsulfate	Xenobiotics	Benzoate Metabolism	0.22	0.21	4.1e-20	0.023	T	A	0.436072	7.51e-06	0.0973646	0	0.436072	1
4	89046202	rs141471965:89046202:C:T	intronic	ABCG2	M48441	C100006082	274.1	Gout	4-hydroxychlorothalonil	Xenobiotics	Chemical	0.074	0.39	2.6e-26	0.036	T	C	0.604218	1.06e-45	0.0425817	0	0.604218	2
4	89095434	rs56357049:89095434:G:A	intronic	ABCG2	M48441	C100006082	274.1	Gout	4-hydroxychlorothalonil	Xenobiotics	Chemical	0.48	-0.14	1.6e-13	0.02	A	G	-0.137754	4.03e-05	0.0335498	0	-0.137754	2
4	89046202	rs141471965:89046202:C:T	intronic	ABCG2	M48441	C100006082	274	Gout and other crystal arthropathies	4-hydroxychlorothalonil	Xenobiotics	Chemical	0.074	0.39	2.6e-26	0.036	T	C	0.547595	2.74e-33	0.0455515	0	0.547595	2
4	89095434	rs56357049:89095434:G:A	intronic	ABCG2	M48441	C100006082	274	Gout and other crystal arthropathies	4-hydroxychlorothalonil	Xenobiotics	Chemical	0.48	-0.14	1.6e-13	0.02	A	G	-0.127666	0.000310815	0.0354028	0	-0.127666	2
4	89046202	rs141471965:89046202:C:T	intronic	ABCG2	M48441	C100006082	274.11	Gouty arthropathy	4-hydroxychlorothalonil	Xenobiotics	Chemical	0.074	0.39	2.6e-26	0.036	T	C	0.616309	2.19e-19	0.0684546	0	0.616309	2
4	89095434	rs56357049:89095434:G:A	intronic	ABCG2	M48441	C100006082	274.11	Gouty arthropathy	4-hydroxychlorothalonil	Xenobiotics	Chemical	0.48	-0.14	1.6e-13	0.02	A	G	-0.179565	0.00115352	0.0552484	0	-0.179565	2
11	63858714	rs12805344:63858714:G:A	intronic	MACROD1	M37207	C100002026	1011	Complications of surgical and medical procedures	androstenediol (3alpha, 17alpha) monosulfate (2)	Lipid	Steroid	0.094	0.18	2.6e-08	0.032	A	G	0.137838	0.0872337	0.0805966	0	0.137838	12
11	64288832	rs7939779:64288832:G:A	intergenic	LOC100996455(dist=69704),SLC22A11(dist=34241)	M37207	C100002026	1011	Complications of surgical and medical procedures	androstenediol (3alpha, 17alpha) monosulfate (2)	Lipid	Steroid	0.085	0.2	1.9e-09	0.033	A	G	0.00598207	0.945296	0.0871469	0	0.00598207	12
12	20948334	rs35735448:20948334:GGAGA:G	intergenic	SLCO1C1(dist=42014),SLCO1B3(dist=15304)	M37207	C100002026	1011	Complications of surgical and medical procedures	androstenediol (3alpha, 17alpha) monosulfate (2)	Lipid	Steroid	0.39	-0.12	4.6e-10	0.02	GGAGA	G	0.0303934	0.608584	0.0593441	1	-0.0303934	12
12	21343833	rs73079476:21343833:A:C	intronic	SLCO1B1	M37207	C100002026	1011	Complications of surgical and medical procedures	androstenediol (3alpha, 17alpha) monosulfate (2)	Lipid	Steroid	0.22	0.13	1.4e-08	0.023	C	A	0.105531	0.162128	0.0754867	0	0.105531	12
19	47856336	rs12984558:47856336:C:T	exonic	DHX34	M37207	C100002026	1011	Complications of surgical and medical procedures	androstenediol (3alpha, 17alpha) monosulfate (2)	Lipid	Steroid	0.063	0.23	1.8e-09	0.038	T	C	0.0915029	0.401206	0.109002	0	0.0915029	12
19	47933728	rs8104926:47933728:A:G	intronic	SLC8A2	M37207	C100002026	1011	Complications of surgical and medical procedures	androstenediol (3alpha, 17alpha) monosulfate (2)	Lipid	Steroid	0.11	-0.19	2.4e-10	0.03	A	G	0.0448586	0.652945	0.0997659	1	-0.0448586	12
19	47989438	rs3760633:47989438:G:A	ncRNA_intronic	NAPA-AS1	M37207	C100002026	1011	Complications of surgical and medical procedures	androstenediol (3alpha, 17alpha) monosulfate (2)	Lipid	Steroid	0.15	0.18	1.3e-11	0.026	A	G	0.0727578	0.408643	0.0880588	0	0.0727578	12
19	48299800	rs73053872:48299800:A:T	intergenic	SELENOW(dist=11862),TPRX1(dist=4700)	M37207	C100002026	1011	Complications of surgical and medical procedures	androstenediol (3alpha, 17alpha) monosulfate (2)	Lipid	Steroid	0.2	0.15	2.8e-11	0.023	T	A	0.114034	0.177895	0.0846402	0	0.114034	12
19	48307742	rs4047206:48307742:C:T	upstream	TPRX1	M37207	C100002026	1011	Complications of surgical and medical procedures	androstenediol (3alpha, 17alpha) monosulfate (2)	Lipid	Steroid	0.12	0.19	8.4e-11	0.029	T	C	0.0541093	0.544916	0.0893764	0	0.0541093	12
19	48342003	rs12971523:48342003:G:A	intronic	CRX	M37207	C100002026	1011	Complications of surgical and medical procedures	androstenediol (3alpha, 17alpha) monosulfate (2)	Lipid	Steroid	0.15	-0.18	7.5e-12	0.026	A	G	-0.169599	0.0167358	0.0708892	0	-0.169599	12
19	48374950	rs62129966:48374950:C:A	intronic	SULT2A1	M37207	C100002026	1011	Complications of surgical and medical procedures	androstenediol (3alpha, 17alpha) monosulfate (2)	Lipid	Steroid	0.17	0.57	2.7e-115	0.024	A	C	0.124878	0.0913541	0.0739689	0	0.124878	12
6	131148382	rs9402288:131148382:A:T	upstream	SMLR1	M37207	C100002026	1011	Complications of surgical and medical procedures	androstenediol (3alpha, 17alpha) monosulfate (2)	Lipid	Steroid	0.43	0.13	4.7e-11	0.019	T	A	0.173104	0.00399244	0.0601319	0	0.173104	12
19	47940463	rs113150151:47940463:A:AT	NA	NA	M37202	C100001992	364	Corneal opacity and other disorders of cornea	androstenediol (3beta,17beta) disulfate (1)	Lipid	Steroid	0.11	-0.17	2.9e-09	0.029	AT	A	0.115407	0.418011	0.142495	0	0.115407	8
19	48157288	rs73045742:48157288:A:T	intronic	BICRA	M37202	C100001992	364	Corneal opacity and other disorders of cornea	androstenediol (3beta,17beta) disulfate (1)	Lipid	Steroid	0.16	-0.14	1.4e-08	0.025	T	A	0.0820776	0.534696	0.132199	0	0.0820776	8
19	48307742	rs4047206:48307742:C:T	upstream	TPRX1	M37202	C100001992	364	Corneal opacity and other disorders of cornea	androstenediol (3beta,17beta) disulfate (1)	Lipid	Steroid	0.12	-0.21	8.7e-14	0.028	T	C	0.239906	0.0483059	0.121493	0	0.239906	8
19	48331871	rs62128760:48331871:C:T	intronic	CRX	M37202	C100001992	364	Corneal opacity and other disorders of cornea	androstenediol (3beta,17beta) disulfate (1)	Lipid	Steroid	0.41	-0.15	8.8e-16	0.019	C	T	0.0200967	0.827513	0.0922231	1	-0.0200967	8
19	48360691	rs76531193:48360691:T:A	intergenic	CRX(dist=14105),SULT2A1(dist=13032)	M37202	C100001992	364	Corneal opacity and other disorders of cornea	androstenediol (3beta,17beta) disulfate (1)	Lipid	Steroid	0.17	-0.51	5.8e-97	0.024	A	T	0.340578	0.000739296	0.100925	0	0.340578	8
19	48404465	rs2932760:48404465:G:A	intergenic	SULT2A1(dist=14811),SNAR-A12(dist=6470)	M37202	C100001992	364	Corneal opacity and other disorders of cornea	androstenediol (3beta,17beta) disulfate (1)	Lipid	Steroid	0.31	0.2	1e-23	0.02	A	G	-0.154692	0.0953782	0.0927582	0	-0.154692	8
6	25785935	rs13197601:25785935:G:A	intronic	SLC17A1	M37202	C100001992	364	Corneal opacity and other disorders of cornea	androstenediol (3beta,17beta) disulfate (1)	Lipid	Steroid	0.33	0.14	8.9e-12	0.02	A	G	-0.0568805	0.49096	0.0825811	0	-0.0568805	8
7	98965615	rs143524414:98965615:G:A	intergenic	ARPC1A(dist=1730),ARPC1B(dist=6683)	M37202	C100001992	364	Corneal opacity and other disorders of cornea	androstenediol (3beta,17beta) disulfate (1)	Lipid	Steroid	0.11	-0.16	1.4e-08	0.029	A	G	-0.181305	0.327727	0.18525	0	-0.181305	8
10	5320950	rs79618354:5320950:G:A	intergenic	AKR1C4(dist=60040),UCN3(dist=86022)	M37203	C100001994	1011	Complications of surgical and medical procedures	androstenediol (3beta,17beta) disulfate (2)	Lipid	Steroid	0.12	-0.21	7.6e-13	0.03	A	G	-0.171855	0.0415712	0.0843343	0	-0.171855	6
12	21319526	rs2199766:21319526:G:A	intronic	SLCO1B1	M37203	C100001994	1011	Complications of surgical and medical procedures	androstenediol (3beta,17beta) disulfate (2)	Lipid	Steroid	0.3	-0.12	2e-08	0.021	A	G	-0.11671	0.0555709	0.0609651	0	-0.11671	6
12	21331549	rs4149056:21331549:T:C	exonic	SLCO1B1	M37203	C100001994	1011	Complications of surgical and medical procedures	androstenediol (3beta,17beta) disulfate (2)	Lipid	Steroid	0.22	0.22	1.8e-21	0.023	C	T	0.106834	0.154297	0.0749948	0	0.106834	6
19	48390760	rs177037:48390760:C:A	intergenic	SULT2A1(dist=1106),SNAR-A12(dist=20175)	M37203	C100001994	1011	Complications of surgical and medical procedures	androstenediol (3beta,17beta) disulfate (2)	Lipid	Steroid	0.46	-0.11	9.3e-10	0.018	C	A	0.170266	0.00239089	0.0560664	1	-0.170266	6
3	195969186	rs56225736:195969186:G:A	intronic	PCYT1A	M37203	C100001994	1011	Complications of surgical and medical procedures	androstenediol (3beta,17beta) disulfate (2)	Lipid	Steroid	0.16	0.14	7.6e-09	0.025	A	G	0.0302285	0.7073	0.0805126	0	0.0302285	6
6	25784800	rs35720558:25784800:A:C	intronic	SLC17A1	M37203	C100001994	1011	Complications of surgical and medical procedures	androstenediol (3beta,17beta) disulfate (2)	Lipid	Steroid	0.33	0.21	6.1e-23	0.021	C	A	0.11963	0.0334453	0.0562526	0	0.11963	6
11	61282350	rs3741259:61282350:C:T	UTR3	SYT7	M01110	C229	555	Inflammatory bowel disease and other gastroenteritis and colitis	arachidonate (20:4n6)	Lipid	Polyunsaturated Fatty Acid (n3 and n6)	0.12	-0.16	1.2e-08	0.028	T	C	-0.0267917	0.657747	0.0604736	0	-0.0267917	8
11	61410580	rs112985048:61410580:AAGACGGGTGGATCACCTG:A	intergenic	RPLP0P2(dist=3659),DAGLA(dist=37325)	M01110	C229	555	Inflammatory bowel disease and other gastroenteritis and colitis	arachidonate (20:4n6)	Lipid	Polyunsaturated Fatty Acid (n3 and n6)	0.2	0.13	6.1e-09	0.023	A	AAGACGGGTGGATCACCTG	0.0135478	0.787913	0.0503469	0	0.0135478	8
11	61571348	rs174548:61571348:C:G	intronic	FADS1	M01110	C229	555	Inflammatory bowel disease and other gastroenteritis and colitis	arachidonate (20:4n6)	Lipid	Polyunsaturated Fatty Acid (n3 and n6)	0.4	-0.37	1.2e-92	0.018	G	C	0.128376	0.000460712	0.0366522	0	0.128376	8
11	61629377	rs113003506:61629377:C:T	intronic	FADS2	M01110	C229	555	Inflammatory bowel disease and other gastroenteritis and colitis	arachidonate (20:4n6)	Lipid	Polyunsaturated Fatty Acid (n3 and n6)	0.13	-0.17	8e-11	0.027	T	C	0.0923057	0.0814352	0.0529733	0	0.0923057	8
11	61647288	rs7942717:61647288:G:A	intronic	FADS3	M01110	C229	555	Inflammatory bowel disease and other gastroenteritis and colitis	arachidonate (20:4n6)	Lipid	Polyunsaturated Fatty Acid (n3 and n6)	0.13	0.25	3.5e-20	0.027	G	A	0.0207727	0.733307	0.0609611	1	-0.0207727	8
11	61660704	rs528285:61660704:A:G	intergenic	FADS3(dist=1687),RAB3IL1(dist=4064)	M01110	C229	555	Inflammatory bowel disease and other gastroenteritis and colitis	arachidonate (20:4n6)	Lipid	Polyunsaturated Fatty Acid (n3 and n6)	0.46	0.13	1.6e-12	0.018	A	G	0.00843433	0.814523	0.0359644	1	-0.00843433	8
11	61705632	rs80243286:61705632:G:A	intergenic	RAB3IL1(dist=17891),BEST1(dist=11724)	M01110	C229	555	Inflammatory bowel disease and other gastroenteritis and colitis	arachidonate (20:4n6)	Lipid	Polyunsaturated Fatty Acid (n3 and n6)	0.088	0.18	1.9e-08	0.033	A	G	-0.0877629	0.241823	0.0749829	0	-0.0877629	8
11	61722212	rs2736594:61722212:G:T	intronic	BEST1	M01110	C229	555	Inflammatory bowel disease and other gastroenteritis and colitis	arachidonate (20:4n6)	Lipid	Polyunsaturated Fatty Acid (n3 and n6)	0.066	-0.22	2.6e-09	0.036	T	G	0.164607	0.00929412	0.0632852	0	0.164607	8
12	21331549	rs4149056:21331549:T:C	exonic	SLCO1B1	M32586	C100001950	574.3	Cholecystitis without cholelithiasis	bilirubin (E,E)*	Cofactors_and_Vitamins	Hemoglobin and Porphyrin Metabolism	0.22	0.14	1.9e-09	0.023	C	T	0.05499	0.546114	0.0910981	0	0.05499	23
2	233702996	rs12623027:233702996:G:A	intronic	GIGYF2	M32586	C100001950	574.3	Cholecystitis without cholelithiasis	bilirubin (E,E)*	Cofactors_and_Vitamins	Hemoglobin and Porphyrin Metabolism	0.46	0.12	3.1e-11	0.019	A	G	0.0391534	0.594028	0.073455	0	0.0391534	23
2	233872049	rs10169752:233872049:A:G	intronic	NGEF	M32586	C100001950	574.3	Cholecystitis without cholelithiasis	bilirubin (E,E)*	Cofactors_and_Vitamins	Hemoglobin and Porphyrin Metabolism	0.41	-0.12	2.4e-11	0.019	A	G	-0.0149928	0.830968	0.0702376	1	0.0149928	23
2	233953421	rs6712404:233953421:G:A	intronic	INPP5D	M32586	C100001950	574.3	Cholecystitis without cholelithiasis	bilirubin (E,E)*	Cofactors_and_Vitamins	Hemoglobin and Porphyrin Metabolism	0.1	-0.18	1.5e-09	0.03	A	G	0.0957555	0.386595	0.110602	0	0.0957555	23
2	234100164	rs56063952:234100164:A:G	intronic	INPP5D	M32586	C100001950	574.3	Cholecystitis without cholelithiasis	bilirubin (E,E)*	Cofactors_and_Vitamins	Hemoglobin and Porphyrin Metabolism	0.3	0.15	2.5e-14	0.02	G	A	0.0552171	0.485962	0.0792484	0	0.0552171	23
2	234138714	rs10199994:234138714:G:C	intergenic	INPP5D(dist=22165),ATG16L1(dist=21503)	M32586	C100001950	574.3	Cholecystitis without cholelithiasis	bilirubin (E,E)*	Cofactors_and_Vitamins	Hemoglobin and Porphyrin Metabolism	0.49	0.15	2.1e-16	0.018	C	G	0.0791254	0.243557	0.0678552	0	0.0791254	23
2	234238949	rs3792095:234238949:G:A	intronic	SAG	M32586	C100001950	574.3	Cholecystitis without cholelithiasis	bilirubin (E,E)*	Cofactors_and_Vitamins	Hemoglobin and Porphyrin Metabolism	0.1	0.36	2.5e-33	0.03	A	G	0.145753	0.27013	0.132171	0	0.145753	23
2	234266409	rs10185174:234266409:C:T	intronic	DGKD	M32586	C100001950	574.3	Cholecystitis without cholelithiasis	bilirubin (E,E)*	Cofactors_and_Vitamins	Hemoglobin and Porphyrin Metabolism	0.056	-0.35	1.4e-18	0.039	T	C	-0.194515	0.200123	0.151822	0	-0.194515	23
2	234357513	rs13016839:234357513:A:G	intronic	DGKD	M32586	C100001950	574.3	Cholecystitis without cholelithiasis	bilirubin (E,E)*	Cofactors_and_Vitamins	Hemoglobin and Porphyrin Metabolism	0.092	-0.21	2.3e-11	0.031	G	A	0.011889	0.914405	0.110594	0	0.011889	23
2	234504340	rs1840144:234504340:A:T	intergenic	USP40(dist=30104),UGT1A8(dist=21951)	M32586	C100001950	574.3	Cholecystitis without cholelithiasis	bilirubin (E,E)*	Cofactors_and_Vitamins	Hemoglobin and Porphyrin Metabolism	0.29	0.13	4.1e-11	0.02	A	T	0.065975	0.388148	0.0764492	1	-0.065975	23
2	234668570	rs887829:234668570:C:T	intronic	UGT1A10,UGT1A3,UGT1A4,UGT1A5,UGT1A6,UGT1A7,UGT1A8,UGT1A9	M32586	C100001950	574.3	Cholecystitis without cholelithiasis	bilirubin (E,E)*	Cofactors_and_Vitamins	Hemoglobin and Porphyrin Metabolism	0.42	0.65	2.9e-295	0.017	T	C	0.221037	0.00132044	0.0688265	0	0.221037	23
2	234677386	rs6431630:234677386:G:A	intronic	UGT1A1,UGT1A10,UGT1A3,UGT1A4,UGT1A5,UGT1A6,UGT1A7,UGT1A8,UGT1A9	M32586	C100001950	574.3	Cholecystitis without cholelithiasis	bilirubin (E,E)*	Cofactors_and_Vitamins	Hemoglobin and Porphyrin Metabolism	0.11	-0.4	2e-44	0.028	A	G	-0.152459	0.177457	0.113048	0	-0.152459	23
2	234695087	rs17868346:234695087:A:G	intronic	MROH2A	M32586	C100001950	574.3	Cholecystitis without cholelithiasis	bilirubin (E,E)*	Cofactors_and_Vitamins	Hemoglobin and Porphyrin Metabolism	0.13	-0.25	2.8e-21	0.027	G	A	-0.186937	0.0391986	0.0906538	0	-0.186937	23
2	234702227	rs17863808:234702227:G:A	intronic	MROH2A	M32586	C100001950	574.3	Cholecystitis without cholelithiasis	bilirubin (E,E)*	Cofactors_and_Vitamins	Hemoglobin and Porphyrin Metabolism	0.08	0.19	1.5e-08	0.034	A	G	0.077683	0.54816	0.129364	0	0.077683	23
2	234709000	rs11563245:234709000:C:T	intronic	MROH2A	M32586	C100001950	574.3	Cholecystitis without cholelithiasis	bilirubin (E,E)*	Cofactors_and_Vitamins	Hemoglobin and Porphyrin Metabolism	0.21	0.12	1.9e-08	0.022	T	C	0.0958282	0.241793	0.0818674	0	0.0958282	23
2	234716903	rs10189367:234716903:G:A	intronic	MROH2A	M32586	C100001950	574.3	Cholecystitis without cholelithiasis	bilirubin (E,E)*	Cofactors_and_Vitamins	Hemoglobin and Porphyrin Metabolism	0.31	-0.11	9e-09	0.02	G	A	0.0317796	0.639791	0.0678979	1	-0.0317796	23
2	234749783	rs17863822:234749783:C:G	exonic	HJURP	M32586	C100001950	574.3	Cholecystitis without cholelithiasis	bilirubin (E,E)*	Cofactors_and_Vitamins	Hemoglobin and Porphyrin Metabolism	0.093	0.23	3.8e-13	0.032	G	C	-0.0217835	0.868048	0.131116	0	-0.0217835	23
2	234807900	rs1468521:234807900:G:C	intergenic	MSL3P1(dist=30845),TRPM8(dist=18143)	M32586	C100001950	574.3	Cholecystitis without cholelithiasis	bilirubin (E,E)*	Cofactors_and_Vitamins	Hemoglobin and Porphyrin Metabolism	0.074	0.22	1.8e-10	0.034	C	G	-0.0413148	0.735034	0.122076	0	-0.0413148	23
2	234830753	rs34459106:234830753:CA:C	intronic	TRPM8	M32586	C100001950	574.3	Cholecystitis without cholelithiasis	bilirubin (E,E)*	Cofactors_and_Vitamins	Hemoglobin and Porphyrin Metabolism	0.19	-0.26	1.1e-28	0.023	C	CA	-0.0169987	0.834354	0.0812853	0	-0.0169987	23
2	234900212	rs17864759:234900212:G:T	intronic	TRPM8	M32586	C100001950	574.3	Cholecystitis without cholelithiasis	bilirubin (E,E)*	Cofactors_and_Vitamins	Hemoglobin and Porphyrin Metabolism	0.08	-0.24	5e-13	0.034	T	G	-0.0773714	0.585313	0.1418	0	-0.0773714	23
2	234901614	rs13034437:234901614:C:T	intronic	TRPM8	M32586	C100001950	574.3	Cholecystitis without cholelithiasis	bilirubin (E,E)*	Cofactors_and_Vitamins	Hemoglobin and Porphyrin Metabolism	0.21	-0.17	3.5e-15	0.022	T	C	0.0125707	0.879401	0.0828803	0	0.0125707	23
2	234934946	rs17869085:234934946:G:A	intergenic	TRPM8(dist=6780),SPP2(dist=24400)	M32586	C100001950	574.3	Cholecystitis without cholelithiasis	bilirubin (E,E)*	Cofactors_and_Vitamins	Hemoglobin and Porphyrin Metabolism	0.17	0.14	3.8e-09	0.024	A	G	0.00221754	0.98492	0.117104	0	0.00221754	23
2	235193920	rs5839517:235193920:TA:T	intergenic	SPP2(dist=208144),LINC01891(dist=159314)	M32586	C100001950	574.3	Cholecystitis without cholelithiasis	bilirubin (E,E)*	Cofactors_and_Vitamins	Hemoglobin and Porphyrin Metabolism	0.4	0.14	2.2e-13	0.018	T	TA	-0.101072	0.178906	0.0751953	0	-0.101072	23
12	21331549	rs4149056:21331549:T:C	exonic	SLCO1B1	M32586	C100001950	574	Cholelithiasis and cholecystitis	bilirubin (E,E)*	Cofactors_and_Vitamins	Hemoglobin and Porphyrin Metabolism	0.22	0.14	1.9e-09	0.023	C	T	0.0545734	0.23888	0.0463338	0	0.0545734	23
2	233702996	rs12623027:233702996:G:A	intronic	GIGYF2	M32586	C100001950	574	Cholelithiasis and cholecystitis	bilirubin (E,E)*	Cofactors_and_Vitamins	Hemoglobin and Porphyrin Metabolism	0.46	0.12	3.1e-11	0.019	A	G	-0.0650955	0.0875065	0.0380963	0	-0.0650955	23
2	233872049	rs10169752:233872049:A:G	intronic	NGEF	M32586	C100001950	574	Cholelithiasis and cholecystitis	bilirubin (E,E)*	Cofactors_and_Vitamins	Hemoglobin and Porphyrin Metabolism	0.41	-0.12	2.4e-11	0.019	A	G	0.0470649	0.183774	0.0354109	1	-0.0470649	23
2	233953421	rs6712404:233953421:G:A	intronic	INPP5D	M32586	C100001950	574	Cholelithiasis and cholecystitis	bilirubin (E,E)*	Cofactors_and_Vitamins	Hemoglobin and Porphyrin Metabolism	0.1	-0.18	1.5e-09	0.03	A	G	0.0397014	0.489802	0.0574887	0	0.0397014	23
2	234100164	rs56063952:234100164:A:G	intronic	INPP5D	M32586	C100001950	574	Cholelithiasis and cholecystitis	bilirubin (E,E)*	Cofactors_and_Vitamins	Hemoglobin and Porphyrin Metabolism	0.3	0.15	2.5e-14	0.02	G	A	0.010376	0.799113	0.0407526	0	0.010376	23
2	234138714	rs10199994:234138714:G:C	intergenic	INPP5D(dist=22165),ATG16L1(dist=21503)	M32586	C100001950	574	Cholelithiasis and cholecystitis	bilirubin (E,E)*	Cofactors_and_Vitamins	Hemoglobin and Porphyrin Metabolism	0.49	0.15	2.1e-16	0.018	C	G	0.0566355	0.101039	0.0345362	0	0.0566355	23
2	234238949	rs3792095:234238949:G:A	intronic	SAG	M32586	C100001950	574	Cholelithiasis and cholecystitis	bilirubin (E,E)*	Cofactors_and_Vitamins	Hemoglobin and Porphyrin Metabolism	0.1	0.36	2.5e-33	0.03	A	G	0.114489	0.0930612	0.0681691	0	0.114489	23
2	234266409	rs10185174:234266409:C:T	intronic	DGKD	M32586	C100001950	574	Cholelithiasis and cholecystitis	bilirubin (E,E)*	Cofactors_and_Vitamins	Hemoglobin and Porphyrin Metabolism	0.056	-0.35	1.4e-18	0.039	T	C	0.092406	0.176817	0.0684204	0	0.092406	23
2	234357513	rs13016839:234357513:A:G	intronic	DGKD	M32586	C100001950	574	Cholelithiasis and cholecystitis	bilirubin (E,E)*	Cofactors_and_Vitamins	Hemoglobin and Porphyrin Metabolism	0.092	-0.21	2.3e-11	0.031	G	A	-0.0112339	0.842808	0.056651	0	-0.0112339	23
2	234504340	rs1840144:234504340:A:T	intergenic	USP40(dist=30104),UGT1A8(dist=21951)	M32586	C100001950	574	Cholelithiasis and cholecystitis	bilirubin (E,E)*	Cofactors_and_Vitamins	Hemoglobin and Porphyrin Metabolism	0.29	0.13	4.1e-11	0.02	A	T	-0.039397	0.322222	0.0397984	1	0.039397	23
2	234668570	rs887829:234668570:C:T	intronic	UGT1A10,UGT1A3,UGT1A4,UGT1A5,UGT1A6,UGT1A7,UGT1A8,UGT1A9	M32586	C100001950	574	Cholelithiasis and cholecystitis	bilirubin (E,E)*	Cofactors_and_Vitamins	Hemoglobin and Porphyrin Metabolism	0.42	0.65	2.9e-295	0.017	T	C	0.141361	6.27e-05	0.0353194	0	0.141361	23
2	234677386	rs6431630:234677386:G:A	intronic	UGT1A1,UGT1A10,UGT1A3,UGT1A4,UGT1A5,UGT1A6,UGT1A7,UGT1A8,UGT1A9	M32586	C100001950	574	Cholelithiasis and cholecystitis	bilirubin (E,E)*	Cofactors_and_Vitamins	Hemoglobin and Porphyrin Metabolism	0.11	-0.4	2e-44	0.028	A	G	-0.00956762	0.860758	0.0545472	0	-0.00956762	23
2	234695087	rs17868346:234695087:A:G	intronic	MROH2A	M32586	C100001950	574	Cholelithiasis and cholecystitis	bilirubin (E,E)*	Cofactors_and_Vitamins	Hemoglobin and Porphyrin Metabolism	0.13	-0.25	2.8e-21	0.027	G	A	-0.109021	0.015025	0.0448316	0	-0.109021	23
2	234702227	rs17863808:234702227:G:A	intronic	MROH2A	M32586	C100001950	574	Cholelithiasis and cholecystitis	bilirubin (E,E)*	Cofactors_and_Vitamins	Hemoglobin and Porphyrin Metabolism	0.08	0.19	1.5e-08	0.034	A	G	0.0425613	0.523158	0.0666644	0	0.0425613	23
2	234709000	rs11563245:234709000:C:T	intronic	MROH2A	M32586	C100001950	574	Cholelithiasis and cholecystitis	bilirubin (E,E)*	Cofactors_and_Vitamins	Hemoglobin and Porphyrin Metabolism	0.21	0.12	1.9e-08	0.022	T	C	0.0912839	0.0285434	0.0416878	0	0.0912839	23
2	234716903	rs10189367:234716903:G:A	intronic	MROH2A	M32586	C100001950	574	Cholelithiasis and cholecystitis	bilirubin (E,E)*	Cofactors_and_Vitamins	Hemoglobin and Porphyrin Metabolism	0.31	-0.11	9e-09	0.02	G	A	0.0365633	0.288872	0.0344746	1	-0.0365633	23
2	234749783	rs17863822:234749783:C:G	exonic	HJURP	M32586	C100001950	574	Cholelithiasis and cholecystitis	bilirubin (E,E)*	Cofactors_and_Vitamins	Hemoglobin and Porphyrin Metabolism	0.093	0.23	3.8e-13	0.032	G	C	-0.0308273	0.64511	0.0669341	0	-0.0308273	23
2	234807900	rs1468521:234807900:G:C	intergenic	MSL3P1(dist=30845),TRPM8(dist=18143)	M32586	C100001950	574	Cholelithiasis and cholecystitis	bilirubin (E,E)*	Cofactors_and_Vitamins	Hemoglobin and Porphyrin Metabolism	0.074	0.22	1.8e-10	0.034	C	G	0.123509	0.0337239	0.0581668	0	0.123509	23
2	234830753	rs34459106:234830753:CA:C	intronic	TRPM8	M32586	C100001950	574	Cholelithiasis and cholecystitis	bilirubin (E,E)*	Cofactors_and_Vitamins	Hemoglobin and Porphyrin Metabolism	0.19	-0.26	1.1e-28	0.023	C	CA	-0.0362916	0.382683	0.0415726	0	-0.0362916	23
2	234900212	rs17864759:234900212:G:T	intronic	TRPM8	M32586	C100001950	574	Cholelithiasis and cholecystitis	bilirubin (E,E)*	Cofactors_and_Vitamins	Hemoglobin and Porphyrin Metabolism	0.08	-0.24	5e-13	0.034	T	G	-0.0321699	0.649289	0.0707409	0	-0.0321699	23
2	234901614	rs13034437:234901614:C:T	intronic	TRPM8	M32586	C100001950	574	Cholelithiasis and cholecystitis	bilirubin (E,E)*	Cofactors_and_Vitamins	Hemoglobin and Porphyrin Metabolism	0.21	-0.17	3.5e-15	0.022	T	C	-0.035536	0.404967	0.0426708	0	-0.035536	23
2	234934946	rs17869085:234934946:G:A	intergenic	TRPM8(dist=6780),SPP2(dist=24400)	M32586	C100001950	574	Cholelithiasis and cholecystitis	bilirubin (E,E)*	Cofactors_and_Vitamins	Hemoglobin and Porphyrin Metabolism	0.17	0.14	3.8e-09	0.024	A	G	-0.0782773	0.202661	0.0614418	0	-0.0782773	23
2	235193920	rs5839517:235193920:TA:T	intergenic	SPP2(dist=208144),LINC01891(dist=159314)	M32586	C100001950	574	Cholelithiasis and cholecystitis	bilirubin (E,E)*	Cofactors_and_Vitamins	Hemoglobin and Porphyrin Metabolism	0.4	0.14	2.2e-13	0.018	T	TA	0.0373536	0.315701	0.0372262	0	0.0373536	23
12	21331549	rs4149056:21331549:T:C	exonic	SLCO1B1	M32586	C100001950	277.4	Disorders of bilirubin excretion	bilirubin (E,E)*	Cofactors_and_Vitamins	Hemoglobin and Porphyrin Metabolism	0.22	0.14	1.9e-09	0.023	C	T	0.0991664	0.484288	0.141786	0	0.0991664	23
2	233702996	rs12623027:233702996:G:A	intronic	GIGYF2	M32586	C100001950	277.4	Disorders of bilirubin excretion	bilirubin (E,E)*	Cofactors_and_Vitamins	Hemoglobin and Porphyrin Metabolism	0.46	0.12	3.1e-11	0.019	A	G	0.00613117	0.958298	0.117171	0	0.00613117	23
2	233872049	rs10169752:233872049:A:G	intronic	NGEF	M32586	C100001950	277.4	Disorders of bilirubin excretion	bilirubin (E,E)*	Cofactors_and_Vitamins	Hemoglobin and Porphyrin Metabolism	0.41	-0.12	2.4e-11	0.019	A	G	0.192965	0.0749768	0.108369	1	-0.192965	23
2	233953421	rs6712404:233953421:G:A	intronic	INPP5D	M32586	C100001950	277.4	Disorders of bilirubin excretion	bilirubin (E,E)*	Cofactors_and_Vitamins	Hemoglobin and Porphyrin Metabolism	0.1	-0.18	1.5e-09	0.03	A	G	-0.274611	0.178038	0.203895	0	-0.274611	23
2	234100164	rs56063952:234100164:A:G	intronic	INPP5D	M32586	C100001950	277.4	Disorders of bilirubin excretion	bilirubin (E,E)*	Cofactors_and_Vitamins	Hemoglobin and Porphyrin Metabolism	0.3	0.15	2.5e-14	0.02	G	A	0.0802611	0.519702	0.124672	0	0.0802611	23
2	234138714	rs10199994:234138714:G:C	intergenic	INPP5D(dist=22165),ATG16L1(dist=21503)	M32586	C100001950	277.4	Disorders of bilirubin excretion	bilirubin (E,E)*	Cofactors_and_Vitamins	Hemoglobin and Porphyrin Metabolism	0.49	0.15	2.1e-16	0.018	C	G	0.0421012	0.695695	0.107629	0	0.0421012	23
2	234238949	rs3792095:234238949:G:A	intronic	SAG	M32586	C100001950	277.4	Disorders of bilirubin excretion	bilirubin (E,E)*	Cofactors_and_Vitamins	Hemoglobin and Porphyrin Metabolism	0.1	0.36	2.5e-33	0.03	A	G	0.26064	0.189988	0.198871	0	0.26064	23
2	234266409	rs10185174:234266409:C:T	intronic	DGKD	M32586	C100001950	277.4	Disorders of bilirubin excretion	bilirubin (E,E)*	Cofactors_and_Vitamins	Hemoglobin and Porphyrin Metabolism	0.056	-0.35	1.4e-18	0.039	T	C	0.0187432	0.931963	0.219538	0	0.0187432	23
2	234357513	rs13016839:234357513:A:G	intronic	DGKD	M32586	C100001950	277.4	Disorders of bilirubin excretion	bilirubin (E,E)*	Cofactors_and_Vitamins	Hemoglobin and Porphyrin Metabolism	0.092	-0.21	2.3e-11	0.031	G	A	-0.00897516	0.959301	0.175876	0	-0.00897516	23
2	234504340	rs1840144:234504340:A:T	intergenic	USP40(dist=30104),UGT1A8(dist=21951)	M32586	C100001950	277.4	Disorders of bilirubin excretion	bilirubin (E,E)*	Cofactors_and_Vitamins	Hemoglobin and Porphyrin Metabolism	0.29	0.13	4.1e-11	0.02	A	T	-0.215543	0.0965153	0.12969	1	0.215543	23
2	234668570	rs887829:234668570:C:T	intronic	UGT1A10,UGT1A3,UGT1A4,UGT1A5,UGT1A6,UGT1A7,UGT1A8,UGT1A9	M32586	C100001950	277.4	Disorders of bilirubin excretion	bilirubin (E,E)*	Cofactors_and_Vitamins	Hemoglobin and Porphyrin Metabolism	0.42	0.65	2.9e-295	0.017	T	C	0.671157	1.94e-10	0.10543	0	0.671157	23
2	234677386	rs6431630:234677386:G:A	intronic	UGT1A1,UGT1A10,UGT1A3,UGT1A4,UGT1A5,UGT1A6,UGT1A7,UGT1A8,UGT1A9	M32586	C100001950	277.4	Disorders of bilirubin excretion	bilirubin (E,E)*	Cofactors_and_Vitamins	Hemoglobin and Porphyrin Metabolism	0.11	-0.4	2e-44	0.028	A	G	-0.833707	0.000456253	0.237848	0	-0.833707	23
2	234695087	rs17868346:234695087:A:G	intronic	MROH2A	M32586	C100001950	277.4	Disorders of bilirubin excretion	bilirubin (E,E)*	Cofactors_and_Vitamins	Hemoglobin and Porphyrin Metabolism	0.13	-0.25	2.8e-21	0.027	G	A	0.167876	0.1919	0.128641	0	0.167876	23
2	234702227	rs17863808:234702227:G:A	intronic	MROH2A	M32586	C100001950	277.4	Disorders of bilirubin excretion	bilirubin (E,E)*	Cofactors_and_Vitamins	Hemoglobin and Porphyrin Metabolism	0.08	0.19	1.5e-08	0.034	A	G	-0.0621754	0.774621	0.217141	0	-0.0621754	23
2	234709000	rs11563245:234709000:C:T	intronic	MROH2A	M32586	C100001950	277.4	Disorders of bilirubin excretion	bilirubin (E,E)*	Cofactors_and_Vitamins	Hemoglobin and Porphyrin Metabolism	0.21	0.12	1.9e-08	0.022	T	C	0.25306	0.042225	0.124581	0	0.25306	23
2	234716903	rs10189367:234716903:G:A	intronic	MROH2A	M32586	C100001950	277.4	Disorders of bilirubin excretion	bilirubin (E,E)*	Cofactors_and_Vitamins	Hemoglobin and Porphyrin Metabolism	0.31	-0.11	9e-09	0.02	G	A	0.00559432	0.958601	0.107758	1	-0.00559432	23
2	234749783	rs17863822:234749783:C:G	exonic	HJURP	M32586	C100001950	277.4	Disorders of bilirubin excretion	bilirubin (E,E)*	Cofactors_and_Vitamins	Hemoglobin and Porphyrin Metabolism	0.093	0.23	3.8e-13	0.032	G	C	0.130976	0.500593	0.194458	0	0.130976	23
2	234807900	rs1468521:234807900:G:C	intergenic	MSL3P1(dist=30845),TRPM8(dist=18143)	M32586	C100001950	277.4	Disorders of bilirubin excretion	bilirubin (E,E)*	Cofactors_and_Vitamins	Hemoglobin and Porphyrin Metabolism	0.074	0.22	1.8e-10	0.034	C	G	0.23763	0.169379	0.172921	0	0.23763	23
2	234830753	rs34459106:234830753:CA:C	intronic	TRPM8	M32586	C100001950	277.4	Disorders of bilirubin excretion	bilirubin (E,E)*	Cofactors_and_Vitamins	Hemoglobin and Porphyrin Metabolism	0.19	-0.26	1.1e-28	0.023	C	CA	0.0726648	0.563766	0.125876	0	0.0726648	23
2	234900212	rs17864759:234900212:G:T	intronic	TRPM8	M32586	C100001950	277.4	Disorders of bilirubin excretion	bilirubin (E,E)*	Cofactors_and_Vitamins	Hemoglobin and Porphyrin Metabolism	0.08	-0.24	5e-13	0.034	T	G	0.117027	0.572205	0.207204	0	0.117027	23
2	234901614	rs13034437:234901614:C:T	intronic	TRPM8	M32586	C100001950	277.4	Disorders of bilirubin excretion	bilirubin (E,E)*	Cofactors_and_Vitamins	Hemoglobin and Porphyrin Metabolism	0.21	-0.17	3.5e-15	0.022	T	C	0.064054	0.621153	0.129605	0	0.064054	23
2	234934946	rs17869085:234934946:G:A	intergenic	TRPM8(dist=6780),SPP2(dist=24400)	M32586	C100001950	277.4	Disorders of bilirubin excretion	bilirubin (E,E)*	Cofactors_and_Vitamins	Hemoglobin and Porphyrin Metabolism	0.17	0.14	3.8e-09	0.024	A	G	0.0122052	0.94721	0.184325	0	0.0122052	23
2	235193920	rs5839517:235193920:TA:T	intergenic	SPP2(dist=208144),LINC01891(dist=159314)	M32586	C100001950	277.4	Disorders of bilirubin excretion	bilirubin (E,E)*	Cofactors_and_Vitamins	Hemoglobin and Porphyrin Metabolism	0.4	0.14	2.2e-13	0.018	T	TA	-0.0211818	0.856455	0.1171	0	-0.0211818	23
12	21126851	rs11045631:21126851:T:C	intergenic	SLCO1B3(dist=57008),SLCO1B7(dist=41779)	M43807	C1090	574	Cholelithiasis and cholecystitis	bilirubin (Z,Z)	Cofactors_and_Vitamins	Hemoglobin and Porphyrin Metabolism	0.19	0.14	6.8e-09	0.024	C	T	-0.0424598	0.278278	0.0391627	0	-0.0424598	34
12	21331549	rs4149056:21331549:T:C	exonic	SLCO1B1	M43807	C1090	574	Cholelithiasis and cholecystitis	bilirubin (Z,Z)	Cofactors_and_Vitamins	Hemoglobin and Porphyrin Metabolism	0.22	0.16	4.9e-12	0.023	C	T	0.0545734	0.23888	0.0463338	0	0.0545734	34
2	233406998	rs1881492:233406998:T:G	intronic	CHRNG	M43807	C1090	574	Cholelithiasis and cholecystitis	bilirubin (Z,Z)	Cofactors_and_Vitamins	Hemoglobin and Porphyrin Metabolism	0.21	-0.14	1.3e-09	0.022	T	G	0.0196948	0.640245	0.042145	1	-0.0196948	34
2	233702996	rs12623027:233702996:G:A	intronic	GIGYF2	M43807	C1090	574	Cholelithiasis and cholecystitis	bilirubin (Z,Z)	Cofactors_and_Vitamins	Hemoglobin and Porphyrin Metabolism	0.46	0.17	2.6e-19	0.019	A	G	-0.0650955	0.0875065	0.0380963	0	-0.0650955	34
2	233872049	rs10169752:233872049:A:G	intronic	NGEF	M43807	C1090	574	Cholelithiasis and cholecystitis	bilirubin (Z,Z)	Cofactors_and_Vitamins	Hemoglobin and Porphyrin Metabolism	0.41	-0.14	2.1e-13	0.018	A	G	0.0470649	0.183774	0.0354109	1	-0.0470649	34
2	233953421	rs6712404:233953421:G:A	intronic	INPP5D	M43807	C1090	574	Cholelithiasis and cholecystitis	bilirubin (Z,Z)	Cofactors_and_Vitamins	Hemoglobin and Porphyrin Metabolism	0.1	-0.2	2.7e-11	0.03	A	G	0.0397014	0.489802	0.0574887	0	0.0397014	34
2	234069313	rs140005135:234069313:T:C	intronic	INPP5D	M43807	C1090	574	Cholelithiasis and cholecystitis	bilirubin (Z,Z)	Cofactors_and_Vitamins	Hemoglobin and Porphyrin Metabolism	0.14	0.2	2.5e-15	0.026	C	T	-0.00930314	0.854117	0.0505957	0	-0.00930314	34
2	234119846	rs56805998:234119846:G:A	intergenic	INPP5D(dist=3297),ATG16L1(dist=40371)	M43807	C1090	574	Cholelithiasis and cholecystitis	bilirubin (Z,Z)	Cofactors_and_Vitamins	Hemoglobin and Porphyrin Metabolism	0.2	0.15	1e-11	0.022	A	G	0.146366	0.000887672	0.0440356	0	0.146366	34
2	234120043	rs78765795:234120043:G:A	intergenic	INPP5D(dist=3494),ATG16L1(dist=40174)	M43807	C1090	574	Cholelithiasis and cholecystitis	bilirubin (Z,Z)	Cofactors_and_Vitamins	Hemoglobin and Porphyrin Metabolism	0.051	-0.26	2.1e-10	0.041	A	G	-0.0329634	0.659321	0.0747732	0	-0.0329634	34
2	234138714	rs10199994:234138714:G:C	intergenic	INPP5D(dist=22165),ATG16L1(dist=21503)	M43807	C1090	574	Cholelithiasis and cholecystitis	bilirubin (Z,Z)	Cofactors_and_Vitamins	Hemoglobin and Porphyrin Metabolism	0.49	0.16	4.6e-19	0.018	C	G	0.0566355	0.101039	0.0345362	0	0.0566355	34
2	234238949	rs3792095:234238949:G:A	intronic	SAG	M43807	C1090	574	Cholelithiasis and cholecystitis	bilirubin (Z,Z)	Cofactors_and_Vitamins	Hemoglobin and Porphyrin Metabolism	0.1	0.42	1.1e-44	0.03	A	G	0.114489	0.0930612	0.0681691	0	0.114489	34
2	234266409	rs10185174:234266409:C:T	intronic	DGKD	M43807	C1090	574	Cholelithiasis and cholecystitis	bilirubin (Z,Z)	Cofactors_and_Vitamins	Hemoglobin and Porphyrin Metabolism	0.056	-0.43	4.1e-28	0.039	T	C	0.092406	0.176817	0.0684204	0	0.092406	34
2	234357513	rs13016839:234357513:A:G	intronic	DGKD	M43807	C1090	574	Cholelithiasis and cholecystitis	bilirubin (Z,Z)	Cofactors_and_Vitamins	Hemoglobin and Porphyrin Metabolism	0.092	-0.26	6e-17	0.031	G	A	-0.0112339	0.842808	0.056651	0	-0.0112339	34
2	234504340	rs1840144:234504340:A:T	intergenic	USP40(dist=30104),UGT1A8(dist=21951)	M43807	C1090	574	Cholelithiasis and cholecystitis	bilirubin (Z,Z)	Cofactors_and_Vitamins	Hemoglobin and Porphyrin Metabolism	0.29	0.2	1.6e-22	0.02	A	T	-0.039397	0.322222	0.0397984	1	0.039397	34
2	234601965	rs1105880:234601965:A:G	exonic	UGT1A6	M43807	C1090	574	Cholelithiasis and cholecystitis	bilirubin (Z,Z)	Cofactors_and_Vitamins	Hemoglobin and Porphyrin Metabolism	0.5	0.67	0	0.016	G	A	0.131642	0.000160644	0.0348816	0	0.131642	34
2	234679384	rs11563251:234679384:C:T	intronic	UGT1A1,UGT1A10,UGT1A3,UGT1A4,UGT1A5,UGT1A6,UGT1A7,UGT1A8,UGT1A9	M43807	C1090	574	Cholelithiasis and cholecystitis	bilirubin (Z,Z)	Cofactors_and_Vitamins	Hemoglobin and Porphyrin Metabolism	0.11	-0.45	6.2e-56	0.028	T	C	-0.00937884	0.861714	0.0538438	0	-0.00937884	34
2	234695087	rs17868346:234695087:A:G	intronic	MROH2A	M43807	C1090	574	Cholelithiasis and cholecystitis	bilirubin (Z,Z)	Cofactors_and_Vitamins	Hemoglobin and Porphyrin Metabolism	0.13	-0.3	2.9e-30	0.026	G	A	-0.109021	0.015025	0.0448316	0	-0.109021	34
2	234701686	rs12622156:234701686:G:A	intronic	MROH2A	M43807	C1090	574	Cholelithiasis and cholecystitis	bilirubin (Z,Z)	Cofactors_and_Vitamins	Hemoglobin and Porphyrin Metabolism	0.11	-0.17	6e-09	0.029	A	G	-0.0155564	0.75862	0.050624	0	-0.0155564	34
2	234709000	rs11563245:234709000:C:T	intronic	MROH2A	M43807	C1090	574	Cholelithiasis and cholecystitis	bilirubin (Z,Z)	Cofactors_and_Vitamins	Hemoglobin and Porphyrin Metabolism	0.21	0.15	1.5e-11	0.022	T	C	0.0912839	0.0285434	0.0416878	0	0.0912839	34
2	234716027	rs112570954:234716027:T:A	intronic	MROH2A	M43807	C1090	574	Cholelithiasis and cholecystitis	bilirubin (Z,Z)	Cofactors_and_Vitamins	Hemoglobin and Porphyrin Metabolism	0.07	-0.22	8.3e-10	0.036	A	T	-0.112039	0.115918	0.0712657	0	-0.112039	34
2	234716903	rs10189367:234716903:G:A	intronic	MROH2A	M43807	C1090	574	Cholelithiasis and cholecystitis	bilirubin (Z,Z)	Cofactors_and_Vitamins	Hemoglobin and Porphyrin Metabolism	0.31	-0.11	4.5e-08	0.02	G	A	0.0365633	0.288872	0.0344746	1	-0.0365633	34
2	234749783	rs17863822:234749783:C:G	exonic	HJURP	M43807	C1090	574	Cholelithiasis and cholecystitis	bilirubin (Z,Z)	Cofactors_and_Vitamins	Hemoglobin and Porphyrin Metabolism	0.093	0.25	5.1e-15	0.031	G	C	-0.0308273	0.64511	0.0669341	0	-0.0308273	34
2	234754664	rs3841510:234754664:G:GAC	NA	NA	M43807	C1090	574	Cholelithiasis and cholecystitis	bilirubin (Z,Z)	Cofactors_and_Vitamins	Hemoglobin and Porphyrin Metabolism	0.14	-0.16	5.6e-10	0.026	GAC	G	0.0285097	0.526545	0.0450245	0	0.0285097	34
2	234807900	rs1468521:234807900:G:C	intergenic	MSL3P1(dist=30845),TRPM8(dist=18143)	M43807	C1090	574	Cholelithiasis and cholecystitis	bilirubin (Z,Z)	Cofactors_and_Vitamins	Hemoglobin and Porphyrin Metabolism	0.074	0.24	2.2e-12	0.034	C	G	0.123509	0.0337239	0.0581668	0	0.123509	34
2	234830753	rs34459106:234830753:CA:C	intronic	TRPM8	M43807	C1090	574	Cholelithiasis and cholecystitis	bilirubin (Z,Z)	Cofactors_and_Vitamins	Hemoglobin and Porphyrin Metabolism	0.19	-0.28	4.9e-34	0.023	C	CA	-0.0362916	0.382683	0.0415726	0	-0.0362916	34
2	234890793	rs4663993:234890793:C:T	intronic	TRPM8	M43807	C1090	574	Cholelithiasis and cholecystitis	bilirubin (Z,Z)	Cofactors_and_Vitamins	Hemoglobin and Porphyrin Metabolism	0.15	-0.15	2.9e-09	0.025	C	T	0.0579292	0.191192	0.0443187	1	-0.0579292	34
2	234900212	rs17864759:234900212:G:T	intronic	TRPM8	M43807	C1090	574	Cholelithiasis and cholecystitis	bilirubin (Z,Z)	Cofactors_and_Vitamins	Hemoglobin and Porphyrin Metabolism	0.08	-0.27	5.4e-16	0.034	T	G	-0.0321699	0.649289	0.0707409	0	-0.0321699	34
2	234901614	rs13034437:234901614:C:T	intronic	TRPM8	M43807	C1090	574	Cholelithiasis and cholecystitis	bilirubin (Z,Z)	Cofactors_and_Vitamins	Hemoglobin and Porphyrin Metabolism	0.21	-0.25	1.9e-29	0.022	T	C	-0.035536	0.404967	0.0426708	0	-0.035536	34
2	234937918	rs17864791:234937918:A:G	intergenic	TRPM8(dist=9752),SPP2(dist=21428)	M43807	C1090	574	Cholelithiasis and cholecystitis	bilirubin (Z,Z)	Cofactors_and_Vitamins	Hemoglobin and Porphyrin Metabolism	0.24	0.18	1.1e-17	0.021	G	A	-0.0897715	0.083019	0.0517886	0	-0.0897715	34
2	234939485	rs12615187:234939485:G:A	intergenic	TRPM8(dist=11319),SPP2(dist=19861)	M43807	C1090	574	Cholelithiasis and cholecystitis	bilirubin (Z,Z)	Cofactors_and_Vitamins	Hemoglobin and Porphyrin Metabolism	0.42	-0.14	3.1e-14	0.018	A	G	0.0227297	0.505104	0.0341094	0	0.0227297	34
2	234980878	rs250976:234980878:A:T	intronic	SPP2	M43807	C1090	574	Cholelithiasis and cholecystitis	bilirubin (Z,Z)	Cofactors_and_Vitamins	Hemoglobin and Porphyrin Metabolism	0.41	0.11	7.5e-09	0.018	T	A	0.0505885	0.137205	0.0340365	0	0.0505885	34
2	235194231	rs4527191:235194231:A:G	intergenic	SPP2(dist=208455),LINC01891(dist=159003)	M43807	C1090	574	Cholelithiasis and cholecystitis	bilirubin (Z,Z)	Cofactors_and_Vitamins	Hemoglobin and Porphyrin Metabolism	0.4	0.15	4.4e-16	0.018	G	A	0.0329801	0.373528	0.0370625	0	0.0329801	34
2	235421562	rs6731170:235421562:C:G	intergenic	ARL4C(dist=15865),LINC01173(dist=169750)	M43807	C1090	574	Cholelithiasis and cholecystitis	bilirubin (Z,Z)	Cofactors_and_Vitamins	Hemoglobin and Porphyrin Metabolism	0.27	-0.15	1.2e-13	0.021	C	G	-0.0449702	0.289962	0.0424962	1	0.0449702	34
2	235673638	rs4233613:235673638:C:T	intergenic	LINC01173(dist=47230),SH3BP4(dist=186990)	M43807	C1090	574	Cholelithiasis and cholecystitis	bilirubin (Z,Z)	Cofactors_and_Vitamins	Hemoglobin and Porphyrin Metabolism	0.35	0.11	9.9e-09	0.019	C	T	0.013084	0.711497	0.0353679	1	-0.013084	34
12	21126851	rs11045631:21126851:T:C	intergenic	SLCO1B3(dist=57008),SLCO1B7(dist=41779)	M43807	C1090	277.4	Disorders of bilirubin excretion	bilirubin (Z,Z)	Cofactors_and_Vitamins	Hemoglobin and Porphyrin Metabolism	0.19	0.14	6.8e-09	0.024	C	T	-0.023457	0.847139	0.121686	0	-0.023457	34
12	21331549	rs4149056:21331549:T:C	exonic	SLCO1B1	M43807	C1090	277.4	Disorders of bilirubin excretion	bilirubin (Z,Z)	Cofactors_and_Vitamins	Hemoglobin and Porphyrin Metabolism	0.22	0.16	4.9e-12	0.023	C	T	0.0991664	0.484288	0.141786	0	0.0991664	34
2	233406998	rs1881492:233406998:T:G	intronic	CHRNG	M43807	C1090	277.4	Disorders of bilirubin excretion	bilirubin (Z,Z)	Cofactors_and_Vitamins	Hemoglobin and Porphyrin Metabolism	0.21	-0.14	1.3e-09	0.022	T	G	0.097671	0.448719	0.128933	1	-0.097671	34
2	233702996	rs12623027:233702996:G:A	intronic	GIGYF2	M43807	C1090	277.4	Disorders of bilirubin excretion	bilirubin (Z,Z)	Cofactors_and_Vitamins	Hemoglobin and Porphyrin Metabolism	0.46	0.17	2.6e-19	0.019	A	G	0.00613117	0.958298	0.117171	0	0.00613117	34
2	233872049	rs10169752:233872049:A:G	intronic	NGEF	M43807	C1090	277.4	Disorders of bilirubin excretion	bilirubin (Z,Z)	Cofactors_and_Vitamins	Hemoglobin and Porphyrin Metabolism	0.41	-0.14	2.1e-13	0.018	A	G	0.192965	0.0749768	0.108369	1	-0.192965	34
2	233953421	rs6712404:233953421:G:A	intronic	INPP5D	M43807	C1090	277.4	Disorders of bilirubin excretion	bilirubin (Z,Z)	Cofactors_and_Vitamins	Hemoglobin and Porphyrin Metabolism	0.1	-0.2	2.7e-11	0.03	A	G	-0.274611	0.178038	0.203895	0	-0.274611	34
2	234069313	rs140005135:234069313:T:C	intronic	INPP5D	M43807	C1090	277.4	Disorders of bilirubin excretion	bilirubin (Z,Z)	Cofactors_and_Vitamins	Hemoglobin and Porphyrin Metabolism	0.14	0.2	2.5e-15	0.026	C	T	0.0392496	0.800371	0.155214	0	0.0392496	34
2	234119846	rs56805998:234119846:G:A	intergenic	INPP5D(dist=3297),ATG16L1(dist=40371)	M43807	C1090	277.4	Disorders of bilirubin excretion	bilirubin (Z,Z)	Cofactors_and_Vitamins	Hemoglobin and Porphyrin Metabolism	0.2	0.15	1e-11	0.022	A	G	0.0127385	0.928987	0.142966	0	0.0127385	34
2	234120043	rs78765795:234120043:G:A	intergenic	INPP5D(dist=3494),ATG16L1(dist=40174)	M43807	C1090	277.4	Disorders of bilirubin excretion	bilirubin (Z,Z)	Cofactors_and_Vitamins	Hemoglobin and Porphyrin Metabolism	0.051	-0.26	2.1e-10	0.041	A	G	-0.257064	0.318955	0.257939	0	-0.257064	34
2	234138714	rs10199994:234138714:G:C	intergenic	INPP5D(dist=22165),ATG16L1(dist=21503)	M43807	C1090	277.4	Disorders of bilirubin excretion	bilirubin (Z,Z)	Cofactors_and_Vitamins	Hemoglobin and Porphyrin Metabolism	0.49	0.16	4.6e-19	0.018	C	G	0.0421012	0.695695	0.107629	0	0.0421012	34
2	234238949	rs3792095:234238949:G:A	intronic	SAG	M43807	C1090	277.4	Disorders of bilirubin excretion	bilirubin (Z,Z)	Cofactors_and_Vitamins	Hemoglobin and Porphyrin Metabolism	0.1	0.42	1.1e-44	0.03	A	G	0.26064	0.189988	0.198871	0	0.26064	34
2	234266409	rs10185174:234266409:C:T	intronic	DGKD	M43807	C1090	277.4	Disorders of bilirubin excretion	bilirubin (Z,Z)	Cofactors_and_Vitamins	Hemoglobin and Porphyrin Metabolism	0.056	-0.43	4.1e-28	0.039	T	C	0.0187432	0.931963	0.219538	0	0.0187432	34
2	234357513	rs13016839:234357513:A:G	intronic	DGKD	M43807	C1090	277.4	Disorders of bilirubin excretion	bilirubin (Z,Z)	Cofactors_and_Vitamins	Hemoglobin and Porphyrin Metabolism	0.092	-0.26	6e-17	0.031	G	A	-0.00897516	0.959301	0.175876	0	-0.00897516	34
2	234504340	rs1840144:234504340:A:T	intergenic	USP40(dist=30104),UGT1A8(dist=21951)	M43807	C1090	277.4	Disorders of bilirubin excretion	bilirubin (Z,Z)	Cofactors_and_Vitamins	Hemoglobin and Porphyrin Metabolism	0.29	0.2	1.6e-22	0.02	A	T	-0.215543	0.0965153	0.12969	1	0.215543	34
2	234601965	rs1105880:234601965:A:G	exonic	UGT1A6	M43807	C1090	277.4	Disorders of bilirubin excretion	bilirubin (Z,Z)	Cofactors_and_Vitamins	Hemoglobin and Porphyrin Metabolism	0.5	0.67	0	0.016	G	A	0.635947	1.52e-09	0.105258	0	0.635947	34
2	234679384	rs11563251:234679384:C:T	intronic	UGT1A1,UGT1A10,UGT1A3,UGT1A4,UGT1A5,UGT1A6,UGT1A7,UGT1A8,UGT1A9	M43807	C1090	277.4	Disorders of bilirubin excretion	bilirubin (Z,Z)	Cofactors_and_Vitamins	Hemoglobin and Porphyrin Metabolism	0.11	-0.45	6.2e-56	0.028	T	C	-0.815545	0.000501076	0.23434	0	-0.815545	34
2	234695087	rs17868346:234695087:A:G	intronic	MROH2A	M43807	C1090	277.4	Disorders of bilirubin excretion	bilirubin (Z,Z)	Cofactors_and_Vitamins	Hemoglobin and Porphyrin Metabolism	0.13	-0.3	2.9e-30	0.026	G	A	0.167876	0.1919	0.128641	0	0.167876	34
2	234701686	rs12622156:234701686:G:A	intronic	MROH2A	M43807	C1090	277.4	Disorders of bilirubin excretion	bilirubin (Z,Z)	Cofactors_and_Vitamins	Hemoglobin and Porphyrin Metabolism	0.11	-0.17	6e-09	0.029	A	G	0.0473606	0.758492	0.154037	0	0.0473606	34
2	234709000	rs11563245:234709000:C:T	intronic	MROH2A	M43807	C1090	277.4	Disorders of bilirubin excretion	bilirubin (Z,Z)	Cofactors_and_Vitamins	Hemoglobin and Porphyrin Metabolism	0.21	0.15	1.5e-11	0.022	T	C	0.25306	0.042225	0.124581	0	0.25306	34
2	234716027	rs112570954:234716027:T:A	intronic	MROH2A	M43807	C1090	277.4	Disorders of bilirubin excretion	bilirubin (Z,Z)	Cofactors_and_Vitamins	Hemoglobin and Porphyrin Metabolism	0.07	-0.22	8.3e-10	0.036	A	T	-0.289152	0.228308	0.240014	0	-0.289152	34
2	234716903	rs10189367:234716903:G:A	intronic	MROH2A	M43807	C1090	277.4	Disorders of bilirubin excretion	bilirubin (Z,Z)	Cofactors_and_Vitamins	Hemoglobin and Porphyrin Metabolism	0.31	-0.11	4.5e-08	0.02	G	A	0.00559432	0.958601	0.107758	1	-0.00559432	34
2	234749783	rs17863822:234749783:C:G	exonic	HJURP	M43807	C1090	277.4	Disorders of bilirubin excretion	bilirubin (Z,Z)	Cofactors_and_Vitamins	Hemoglobin and Porphyrin Metabolism	0.093	0.25	5.1e-15	0.031	G	C	0.130976	0.500593	0.194458	0	0.130976	34
2	234754664	rs3841510:234754664:G:GAC	NA	NA	M43807	C1090	277.4	Disorders of bilirubin excretion	bilirubin (Z,Z)	Cofactors_and_Vitamins	Hemoglobin and Porphyrin Metabolism	0.14	-0.16	5.6e-10	0.026	GAC	G	0.00447995	0.974721	0.1414	0	0.00447995	34
2	234807900	rs1468521:234807900:G:C	intergenic	MSL3P1(dist=30845),TRPM8(dist=18143)	M43807	C1090	277.4	Disorders of bilirubin excretion	bilirubin (Z,Z)	Cofactors_and_Vitamins	Hemoglobin and Porphyrin Metabolism	0.074	0.24	2.2e-12	0.034	C	G	0.23763	0.169379	0.172921	0	0.23763	34
2	234830753	rs34459106:234830753:CA:C	intronic	TRPM8	M43807	C1090	277.4	Disorders of bilirubin excretion	bilirubin (Z,Z)	Cofactors_and_Vitamins	Hemoglobin and Porphyrin Metabolism	0.19	-0.28	4.9e-34	0.023	C	CA	0.0726648	0.563766	0.125876	0	0.0726648	34
2	234890793	rs4663993:234890793:C:T	intronic	TRPM8	M43807	C1090	277.4	Disorders of bilirubin excretion	bilirubin (Z,Z)	Cofactors_and_Vitamins	Hemoglobin and Porphyrin Metabolism	0.15	-0.15	2.9e-09	0.025	C	T	0.0144649	0.917487	0.139587	1	-0.0144649	34
2	234900212	rs17864759:234900212:G:T	intronic	TRPM8	M43807	C1090	277.4	Disorders of bilirubin excretion	bilirubin (Z,Z)	Cofactors_and_Vitamins	Hemoglobin and Porphyrin Metabolism	0.08	-0.27	5.4e-16	0.034	T	G	0.117027	0.572205	0.207204	0	0.117027	34
2	234901614	rs13034437:234901614:C:T	intronic	TRPM8	M43807	C1090	277.4	Disorders of bilirubin excretion	bilirubin (Z,Z)	Cofactors_and_Vitamins	Hemoglobin and Porphyrin Metabolism	0.21	-0.25	1.9e-29	0.022	T	C	0.064054	0.621153	0.129605	0	0.064054	34
2	234937918	rs17864791:234937918:A:G	intergenic	TRPM8(dist=9752),SPP2(dist=21428)	M43807	C1090	277.4	Disorders of bilirubin excretion	bilirubin (Z,Z)	Cofactors_and_Vitamins	Hemoglobin and Porphyrin Metabolism	0.24	0.18	1.1e-17	0.021	G	A	0.00214769	0.989019	0.156139	0	0.00214769	34
2	234939485	rs12615187:234939485:G:A	intergenic	TRPM8(dist=11319),SPP2(dist=19861)	M43807	C1090	277.4	Disorders of bilirubin excretion	bilirubin (Z,Z)	Cofactors_and_Vitamins	Hemoglobin and Porphyrin Metabolism	0.42	-0.14	3.1e-14	0.018	A	G	-0.0453008	0.671549	0.106835	0	-0.0453008	34
2	234980878	rs250976:234980878:A:T	intronic	SPP2	M43807	C1090	277.4	Disorders of bilirubin excretion	bilirubin (Z,Z)	Cofactors_and_Vitamins	Hemoglobin and Porphyrin Metabolism	0.41	0.11	7.5e-09	0.018	T	A	0.0633409	0.550157	0.105999	0	0.0633409	34
2	235194231	rs4527191:235194231:A:G	intergenic	SPP2(dist=208455),LINC01891(dist=159003)	M43807	C1090	277.4	Disorders of bilirubin excretion	bilirubin (Z,Z)	Cofactors_and_Vitamins	Hemoglobin and Porphyrin Metabolism	0.4	0.15	4.4e-16	0.018	G	A	-0.0282997	0.808295	0.116641	0	-0.0282997	34
2	235421562	rs6731170:235421562:C:G	intergenic	ARL4C(dist=15865),LINC01173(dist=169750)	M43807	C1090	277.4	Disorders of bilirubin excretion	bilirubin (Z,Z)	Cofactors_and_Vitamins	Hemoglobin and Porphyrin Metabolism	0.27	-0.15	1.2e-13	0.021	C	G	-0.122186	0.368379	0.135836	1	0.122186	34
2	235673638	rs4233613:235673638:C:T	intergenic	LINC01173(dist=47230),SH3BP4(dist=186990)	M43807	C1090	277.4	Disorders of bilirubin excretion	bilirubin (Z,Z)	Cofactors_and_Vitamins	Hemoglobin and Porphyrin Metabolism	0.35	0.11	9.9e-09	0.019	C	T	0.203528	0.05936	0.107943	1	-0.203528	34
12	21126851	rs11045631:21126851:T:C	intergenic	SLCO1B3(dist=57008),SLCO1B7(dist=41779)	M02137	C250	574	Cholelithiasis and cholecystitis	biliverdin	Cofactors_and_Vitamins	Hemoglobin and Porphyrin Metabolism	0.19	0.15	1.7e-10	0.024	C	T	-0.0424598	0.278278	0.0391627	0	-0.0424598	30
12	21331549	rs4149056:21331549:T:C	exonic	SLCO1B1	M02137	C250	574	Cholelithiasis and cholecystitis	biliverdin	Cofactors_and_Vitamins	Hemoglobin and Porphyrin Metabolism	0.22	0.17	1.1e-13	0.023	C	T	0.0545734	0.23888	0.0463338	0	0.0545734	30
2	233406998	rs1881492:233406998:T:G	intronic	CHRNG	M02137	C250	574	Cholelithiasis and cholecystitis	biliverdin	Cofactors_and_Vitamins	Hemoglobin and Porphyrin Metabolism	0.21	-0.13	1.9e-08	0.023	T	G	0.0196948	0.640245	0.042145	1	-0.0196948	30
2	233515747	rs16829377:233515747:C:G	intronic	EFHD1	M02137	C250	574	Cholelithiasis and cholecystitis	biliverdin	Cofactors_and_Vitamins	Hemoglobin and Porphyrin Metabolism	0.11	0.16	4.3e-08	0.029	G	C	0.183146	0.00425089	0.0640602	0	0.183146	30
2	233702996	rs12623027:233702996:G:A	intronic	GIGYF2	M02137	C250	574	Cholelithiasis and cholecystitis	biliverdin	Cofactors_and_Vitamins	Hemoglobin and Porphyrin Metabolism	0.46	0.14	1.8e-14	0.019	A	G	-0.0650955	0.0875065	0.0380963	0	-0.0650955	30
2	233864457	rs12470285:233864457:C:T	intronic	NGEF	M02137	C250	574	Cholelithiasis and cholecystitis	biliverdin	Cofactors_and_Vitamins	Hemoglobin and Porphyrin Metabolism	0.16	-0.14	1.1e-08	0.024	T	C	0.0457092	0.310851	0.0451078	0	0.0457092	30
2	233872049	rs10169752:233872049:A:G	intronic	NGEF	M02137	C250	574	Cholelithiasis and cholecystitis	biliverdin	Cofactors_and_Vitamins	Hemoglobin and Porphyrin Metabolism	0.41	-0.12	1.8e-11	0.018	A	G	0.0470649	0.183774	0.0354109	1	-0.0470649	30
2	234100164	rs56063952:234100164:A:G	intronic	INPP5D	M02137	C250	574	Cholelithiasis and cholecystitis	biliverdin	Cofactors_and_Vitamins	Hemoglobin and Porphyrin Metabolism	0.3	0.15	2e-14	0.02	G	A	0.010376	0.799113	0.0407526	0	0.010376	30
2	234120043	rs78765795:234120043:G:A	intergenic	INPP5D(dist=3494),ATG16L1(dist=40174)	M02137	C250	574	Cholelithiasis and cholecystitis	biliverdin	Cofactors_and_Vitamins	Hemoglobin and Porphyrin Metabolism	0.051	-0.28	7e-12	0.041	A	G	-0.0329634	0.659321	0.0747732	0	-0.0329634	30
2	234138714	rs10199994:234138714:G:C	intergenic	INPP5D(dist=22165),ATG16L1(dist=21503)	M02137	C250	574	Cholelithiasis and cholecystitis	biliverdin	Cofactors_and_Vitamins	Hemoglobin and Porphyrin Metabolism	0.49	0.17	2.6e-20	0.018	C	G	0.0566355	0.101039	0.0345362	0	0.0566355	30
2	234238949	rs3792095:234238949:G:A	intronic	SAG	M02137	C250	574	Cholelithiasis and cholecystitis	biliverdin	Cofactors_and_Vitamins	Hemoglobin and Porphyrin Metabolism	0.1	0.38	3.3e-37	0.03	A	G	0.114489	0.0930612	0.0681691	0	0.114489	30
2	234266409	rs10185174:234266409:C:T	intronic	DGKD	M02137	C250	574	Cholelithiasis and cholecystitis	biliverdin	Cofactors_and_Vitamins	Hemoglobin and Porphyrin Metabolism	0.056	-0.42	2.3e-27	0.039	T	C	0.092406	0.176817	0.0684204	0	0.092406	30
2	234357513	rs13016839:234357513:A:G	intronic	DGKD	M02137	C250	574	Cholelithiasis and cholecystitis	biliverdin	Cofactors_and_Vitamins	Hemoglobin and Porphyrin Metabolism	0.092	-0.25	1.7e-15	0.031	G	A	-0.0112339	0.842808	0.056651	0	-0.0112339	30
2	234504340	rs1840144:234504340:A:T	intergenic	USP40(dist=30104),UGT1A8(dist=21951)	M02137	C250	574	Cholelithiasis and cholecystitis	biliverdin	Cofactors_and_Vitamins	Hemoglobin and Porphyrin Metabolism	0.29	0.17	1.1e-16	0.02	A	T	-0.039397	0.322222	0.0397984	1	0.039397	30
2	234664586	rs35754645:234664586:ATC:A	intronic	UGT1A10,UGT1A3,UGT1A4,UGT1A5,UGT1A6,UGT1A7,UGT1A8,UGT1A9	M02137	C250	574	Cholelithiasis and cholecystitis	biliverdin	Cofactors_and_Vitamins	Hemoglobin and Porphyrin Metabolism	0.42	0.7	0	0.016	A	ATC	0.142532	5.57e-05	0.0353646	0	0.142532	30
2	234679384	rs11563251:234679384:C:T	intronic	UGT1A1,UGT1A10,UGT1A3,UGT1A4,UGT1A5,UGT1A6,UGT1A7,UGT1A8,UGT1A9	M02137	C250	574	Cholelithiasis and cholecystitis	biliverdin	Cofactors_and_Vitamins	Hemoglobin and Porphyrin Metabolism	0.11	-0.41	1.7e-47	0.028	T	C	-0.00937884	0.861714	0.0538438	0	-0.00937884	30
2	234695087	rs17868346:234695087:A:G	intronic	MROH2A	M02137	C250	574	Cholelithiasis and cholecystitis	biliverdin	Cofactors_and_Vitamins	Hemoglobin and Porphyrin Metabolism	0.13	-0.3	2.7e-29	0.026	G	A	-0.109021	0.015025	0.0448316	0	-0.109021	30
2	234709000	rs11563245:234709000:C:T	intronic	MROH2A	M02137	C250	574	Cholelithiasis and cholecystitis	biliverdin	Cofactors_and_Vitamins	Hemoglobin and Porphyrin Metabolism	0.21	0.16	1.1e-12	0.022	T	C	0.0912839	0.0285434	0.0416878	0	0.0912839	30
2	234716027	rs112570954:234716027:T:A	intronic	MROH2A	M02137	C250	574	Cholelithiasis and cholecystitis	biliverdin	Cofactors_and_Vitamins	Hemoglobin and Porphyrin Metabolism	0.07	-0.2	2.3e-08	0.036	A	T	-0.112039	0.115918	0.0712657	0	-0.112039	30
2	234749783	rs17863822:234749783:C:G	exonic	HJURP	M02137	C250	574	Cholelithiasis and cholecystitis	biliverdin	Cofactors_and_Vitamins	Hemoglobin and Porphyrin Metabolism	0.093	0.23	1.9e-13	0.031	G	C	-0.0308273	0.64511	0.0669341	0	-0.0308273	30
2	234754664	rs3841510:234754664:G:GAC	NA	NA	M02137	C250	574	Cholelithiasis and cholecystitis	biliverdin	Cofactors_and_Vitamins	Hemoglobin and Porphyrin Metabolism	0.14	-0.17	1.5e-10	0.026	GAC	G	0.0285097	0.526545	0.0450245	0	0.0285097	30
2	234807900	rs1468521:234807900:G:C	intergenic	MSL3P1(dist=30845),TRPM8(dist=18143)	M02137	C250	574	Cholelithiasis and cholecystitis	biliverdin	Cofactors_and_Vitamins	Hemoglobin and Porphyrin Metabolism	0.074	0.24	1.4e-12	0.034	C	G	0.123509	0.0337239	0.0581668	0	0.123509	30
2	234830753	rs34459106:234830753:CA:C	intronic	TRPM8	M02137	C250	574	Cholelithiasis and cholecystitis	biliverdin	Cofactors_and_Vitamins	Hemoglobin and Porphyrin Metabolism	0.19	-0.27	3.9e-32	0.023	C	CA	-0.0362916	0.382683	0.0415726	0	-0.0362916	30
2	234892467	rs17868396:234892467:G:C	intronic	TRPM8	M02137	C250	574	Cholelithiasis and cholecystitis	biliverdin	Cofactors_and_Vitamins	Hemoglobin and Porphyrin Metabolism	0.075	-0.3	1.5e-17	0.035	C	G	-0.0228869	0.744692	0.0702824	0	-0.0228869	30
2	234901614	rs13034437:234901614:C:T	intronic	TRPM8	M02137	C250	574	Cholelithiasis and cholecystitis	biliverdin	Cofactors_and_Vitamins	Hemoglobin and Porphyrin Metabolism	0.21	-0.24	7.9e-27	0.022	T	C	-0.035536	0.404967	0.0426708	0	-0.035536	30
2	234937918	rs17864791:234937918:A:G	intergenic	TRPM8(dist=9752),SPP2(dist=21428)	M02137	C250	574	Cholelithiasis and cholecystitis	biliverdin	Cofactors_and_Vitamins	Hemoglobin and Porphyrin Metabolism	0.24	0.16	7.5e-14	0.021	G	A	-0.0897715	0.083019	0.0517886	0	-0.0897715	30
2	234938781	rs2362296:234938781:T:C	intergenic	TRPM8(dist=10615),SPP2(dist=20565)	M02137	C250	574	Cholelithiasis and cholecystitis	biliverdin	Cofactors_and_Vitamins	Hemoglobin and Porphyrin Metabolism	0.43	-0.12	7.4e-11	0.018	C	T	0.0227493	0.504667	0.0341037	0	0.0227493	30
2	235193920	rs5839517:235193920:TA:T	intergenic	SPP2(dist=208144),LINC01891(dist=159314)	M02137	C250	574	Cholelithiasis and cholecystitis	biliverdin	Cofactors_and_Vitamins	Hemoglobin and Porphyrin Metabolism	0.4	0.13	5.2e-13	0.018	T	TA	0.0373536	0.315701	0.0372262	0	0.0373536	30
2	235344865	rs80343399:235344865:G:T	intergenic	SPP2(dist=359089),LINC01891(dist=8369)	M02137	C250	574	Cholelithiasis and cholecystitis	biliverdin	Cofactors_and_Vitamins	Hemoglobin and Porphyrin Metabolism	0.062	0.22	3.4e-09	0.037	T	G	0.133184	0.0158731	0.0552211	0	0.133184	30
2	235421562	rs6731170:235421562:C:G	intergenic	ARL4C(dist=15865),LINC01173(dist=169750)	M02137	C250	574	Cholelithiasis and cholecystitis	biliverdin	Cofactors_and_Vitamins	Hemoglobin and Porphyrin Metabolism	0.27	-0.13	1.2e-10	0.021	C	G	-0.0449702	0.289962	0.0424962	1	0.0449702	30
12	21126851	rs11045631:21126851:T:C	intergenic	SLCO1B3(dist=57008),SLCO1B7(dist=41779)	M02137	C250	277.4	Disorders of bilirubin excretion	biliverdin	Cofactors_and_Vitamins	Hemoglobin and Porphyrin Metabolism	0.19	0.15	1.7e-10	0.024	C	T	-0.023457	0.847139	0.121686	0	-0.023457	30
12	21331549	rs4149056:21331549:T:C	exonic	SLCO1B1	M02137	C250	277.4	Disorders of bilirubin excretion	biliverdin	Cofactors_and_Vitamins	Hemoglobin and Porphyrin Metabolism	0.22	0.17	1.1e-13	0.023	C	T	0.0991664	0.484288	0.141786	0	0.0991664	30
2	233406998	rs1881492:233406998:T:G	intronic	CHRNG	M02137	C250	277.4	Disorders of bilirubin excretion	biliverdin	Cofactors_and_Vitamins	Hemoglobin and Porphyrin Metabolism	0.21	-0.13	1.9e-08	0.023	T	G	0.097671	0.448719	0.128933	1	-0.097671	30
2	233515747	rs16829377:233515747:C:G	intronic	EFHD1	M02137	C250	277.4	Disorders of bilirubin excretion	biliverdin	Cofactors_and_Vitamins	Hemoglobin and Porphyrin Metabolism	0.11	0.16	4.3e-08	0.029	G	C	0.204303	0.298649	0.196572	0	0.204303	30
2	233702996	rs12623027:233702996:G:A	intronic	GIGYF2	M02137	C250	277.4	Disorders of bilirubin excretion	biliverdin	Cofactors_and_Vitamins	Hemoglobin and Porphyrin Metabolism	0.46	0.14	1.8e-14	0.019	A	G	0.00613117	0.958298	0.117171	0	0.00613117	30
2	233864457	rs12470285:233864457:C:T	intronic	NGEF	M02137	C250	277.4	Disorders of bilirubin excretion	biliverdin	Cofactors_and_Vitamins	Hemoglobin and Porphyrin Metabolism	0.16	-0.14	1.1e-08	0.024	T	C	-0.399076	0.0148783	0.163869	0	-0.399076	30
2	233872049	rs10169752:233872049:A:G	intronic	NGEF	M02137	C250	277.4	Disorders of bilirubin excretion	biliverdin	Cofactors_and_Vitamins	Hemoglobin and Porphyrin Metabolism	0.41	-0.12	1.8e-11	0.018	A	G	0.192965	0.0749768	0.108369	1	-0.192965	30
2	234100164	rs56063952:234100164:A:G	intronic	INPP5D	M02137	C250	277.4	Disorders of bilirubin excretion	biliverdin	Cofactors_and_Vitamins	Hemoglobin and Porphyrin Metabolism	0.3	0.15	2e-14	0.02	G	A	0.0802611	0.519702	0.124672	0	0.0802611	30
2	234120043	rs78765795:234120043:G:A	intergenic	INPP5D(dist=3494),ATG16L1(dist=40174)	M02137	C250	277.4	Disorders of bilirubin excretion	biliverdin	Cofactors_and_Vitamins	Hemoglobin and Porphyrin Metabolism	0.051	-0.28	7e-12	0.041	A	G	-0.257064	0.318955	0.257939	0	-0.257064	30
2	234138714	rs10199994:234138714:G:C	intergenic	INPP5D(dist=22165),ATG16L1(dist=21503)	M02137	C250	277.4	Disorders of bilirubin excretion	biliverdin	Cofactors_and_Vitamins	Hemoglobin and Porphyrin Metabolism	0.49	0.17	2.6e-20	0.018	C	G	0.0421012	0.695695	0.107629	0	0.0421012	30
2	234238949	rs3792095:234238949:G:A	intronic	SAG	M02137	C250	277.4	Disorders of bilirubin excretion	biliverdin	Cofactors_and_Vitamins	Hemoglobin and Porphyrin Metabolism	0.1	0.38	3.3e-37	0.03	A	G	0.26064	0.189988	0.198871	0	0.26064	30
2	234266409	rs10185174:234266409:C:T	intronic	DGKD	M02137	C250	277.4	Disorders of bilirubin excretion	biliverdin	Cofactors_and_Vitamins	Hemoglobin and Porphyrin Metabolism	0.056	-0.42	2.3e-27	0.039	T	C	0.0187432	0.931963	0.219538	0	0.0187432	30
2	234357513	rs13016839:234357513:A:G	intronic	DGKD	M02137	C250	277.4	Disorders of bilirubin excretion	biliverdin	Cofactors_and_Vitamins	Hemoglobin and Porphyrin Metabolism	0.092	-0.25	1.7e-15	0.031	G	A	-0.00897516	0.959301	0.175876	0	-0.00897516	30
2	234504340	rs1840144:234504340:A:T	intergenic	USP40(dist=30104),UGT1A8(dist=21951)	M02137	C250	277.4	Disorders of bilirubin excretion	biliverdin	Cofactors_and_Vitamins	Hemoglobin and Porphyrin Metabolism	0.29	0.17	1.1e-16	0.02	A	T	-0.215543	0.0965153	0.12969	1	0.215543	30
2	234664586	rs35754645:234664586:ATC:A	intronic	UGT1A10,UGT1A3,UGT1A4,UGT1A5,UGT1A6,UGT1A7,UGT1A8,UGT1A9	M02137	C250	277.4	Disorders of bilirubin excretion	biliverdin	Cofactors_and_Vitamins	Hemoglobin and Porphyrin Metabolism	0.42	0.7	0	0.016	A	ATC	0.671505	2.02e-10	0.105589	0	0.671505	30
2	234679384	rs11563251:234679384:C:T	intronic	UGT1A1,UGT1A10,UGT1A3,UGT1A4,UGT1A5,UGT1A6,UGT1A7,UGT1A8,UGT1A9	M02137	C250	277.4	Disorders of bilirubin excretion	biliverdin	Cofactors_and_Vitamins	Hemoglobin and Porphyrin Metabolism	0.11	-0.41	1.7e-47	0.028	T	C	-0.815545	0.000501076	0.23434	0	-0.815545	30
2	234695087	rs17868346:234695087:A:G	intronic	MROH2A	M02137	C250	277.4	Disorders of bilirubin excretion	biliverdin	Cofactors_and_Vitamins	Hemoglobin and Porphyrin Metabolism	0.13	-0.3	2.7e-29	0.026	G	A	0.167876	0.1919	0.128641	0	0.167876	30
2	234709000	rs11563245:234709000:C:T	intronic	MROH2A	M02137	C250	277.4	Disorders of bilirubin excretion	biliverdin	Cofactors_and_Vitamins	Hemoglobin and Porphyrin Metabolism	0.21	0.16	1.1e-12	0.022	T	C	0.25306	0.042225	0.124581	0	0.25306	30
2	234716027	rs112570954:234716027:T:A	intronic	MROH2A	M02137	C250	277.4	Disorders of bilirubin excretion	biliverdin	Cofactors_and_Vitamins	Hemoglobin and Porphyrin Metabolism	0.07	-0.2	2.3e-08	0.036	A	T	-0.289152	0.228308	0.240014	0	-0.289152	30
2	234749783	rs17863822:234749783:C:G	exonic	HJURP	M02137	C250	277.4	Disorders of bilirubin excretion	biliverdin	Cofactors_and_Vitamins	Hemoglobin and Porphyrin Metabolism	0.093	0.23	1.9e-13	0.031	G	C	0.130976	0.500593	0.194458	0	0.130976	30
2	234754664	rs3841510:234754664:G:GAC	NA	NA	M02137	C250	277.4	Disorders of bilirubin excretion	biliverdin	Cofactors_and_Vitamins	Hemoglobin and Porphyrin Metabolism	0.14	-0.17	1.5e-10	0.026	GAC	G	0.00447995	0.974721	0.1414	0	0.00447995	30
2	234807900	rs1468521:234807900:G:C	intergenic	MSL3P1(dist=30845),TRPM8(dist=18143)	M02137	C250	277.4	Disorders of bilirubin excretion	biliverdin	Cofactors_and_Vitamins	Hemoglobin and Porphyrin Metabolism	0.074	0.24	1.4e-12	0.034	C	G	0.23763	0.169379	0.172921	0	0.23763	30
2	234830753	rs34459106:234830753:CA:C	intronic	TRPM8	M02137	C250	277.4	Disorders of bilirubin excretion	biliverdin	Cofactors_and_Vitamins	Hemoglobin and Porphyrin Metabolism	0.19	-0.27	3.9e-32	0.023	C	CA	0.0726648	0.563766	0.125876	0	0.0726648	30
2	234892467	rs17868396:234892467:G:C	intronic	TRPM8	M02137	C250	277.4	Disorders of bilirubin excretion	biliverdin	Cofactors_and_Vitamins	Hemoglobin and Porphyrin Metabolism	0.075	-0.3	1.5e-17	0.035	C	G	0.0700576	0.739982	0.211092	0	0.0700576	30
2	234901614	rs13034437:234901614:C:T	intronic	TRPM8	M02137	C250	277.4	Disorders of bilirubin excretion	biliverdin	Cofactors_and_Vitamins	Hemoglobin and Porphyrin Metabolism	0.21	-0.24	7.9e-27	0.022	T	C	0.064054	0.621153	0.129605	0	0.064054	30
2	234937918	rs17864791:234937918:A:G	intergenic	TRPM8(dist=9752),SPP2(dist=21428)	M02137	C250	277.4	Disorders of bilirubin excretion	biliverdin	Cofactors_and_Vitamins	Hemoglobin and Porphyrin Metabolism	0.24	0.16	7.5e-14	0.021	G	A	0.00214769	0.989019	0.156139	0	0.00214769	30
2	234938781	rs2362296:234938781:T:C	intergenic	TRPM8(dist=10615),SPP2(dist=20565)	M02137	C250	277.4	Disorders of bilirubin excretion	biliverdin	Cofactors_and_Vitamins	Hemoglobin and Porphyrin Metabolism	0.43	-0.12	7.4e-11	0.018	C	T	-0.0423596	0.691697	0.106818	0	-0.0423596	30
2	235193920	rs5839517:235193920:TA:T	intergenic	SPP2(dist=208144),LINC01891(dist=159314)	M02137	C250	277.4	Disorders of bilirubin excretion	biliverdin	Cofactors_and_Vitamins	Hemoglobin and Porphyrin Metabolism	0.4	0.13	5.2e-13	0.018	T	TA	-0.0211818	0.856455	0.1171	0	-0.0211818	30
2	235344865	rs80343399:235344865:G:T	intergenic	SPP2(dist=359089),LINC01891(dist=8369)	M02137	C250	277.4	Disorders of bilirubin excretion	biliverdin	Cofactors_and_Vitamins	Hemoglobin and Porphyrin Metabolism	0.062	0.22	3.4e-09	0.037	T	G	-0.17554	0.367215	0.194676	0	-0.17554	30
2	235421562	rs6731170:235421562:C:G	intergenic	ARL4C(dist=15865),LINC01173(dist=169750)	M02137	C250	277.4	Disorders of bilirubin excretion	biliverdin	Cofactors_and_Vitamins	Hemoglobin and Porphyrin Metabolism	0.27	-0.13	1.2e-10	0.021	C	G	-0.122186	0.368379	0.135836	1	0.122186	30
2	41355596	rs71441133:41355596:G:A	intergenic	SLC8A1(dist=616021),LINC01913(dist=749099)	M33997	C100001269	411.8	\Other chronic ischemic heart disease, unspecified\	campesterol	Lipid	Sterol	0.041	0.31	5.1e-09	0.052	A	G	0.0499799	0.417962	0.0617089	0	0.0499799	8
2	42977503	rs6544593:42977503:A:G	intronic	MTA3	M33997	C100001269	411.8	\Other chronic ischemic heart disease, unspecified\	campesterol	Lipid	Sterol	0.43	-0.13	6.3e-10	0.021	G	A	-0.0435737	0.139698	0.0295028	0	-0.0435737	8
2	44015391	rs11695053:44015391:A:C	intronic	DYNC2LI1	M33997	C100001269	411.8	\Other chronic ischemic heart disease, unspecified\	campesterol	Lipid	Sterol	0.17	0.19	2.8e-12	0.028	C	A	0.0085434	0.822445	0.0380572	0	0.0085434	8
2	44073881	rs6544713:44073881:T:C	intronic	ABCG8	M33997	C100001269	411.8	\Other chronic ischemic heart disease, unspecified\	campesterol	Lipid	Sterol	0.2	-0.33	2.7e-37	0.026	T	C	0.0616406	0.0322225	0.0287815	1	-0.0616406	8
2	44078853	rs56132765:44078853:G:A	exonic	ABCG8	M33997	C100001269	411.8	\Other chronic ischemic heart disease, unspecified\	campesterol	Lipid	Sterol	0.088	-0.44	4.2e-34	0.036	A	G	-0.0886258	0.123727	0.0575744	0	-0.0886258	8
2	44274729	rs11680869:44274729:A:G	intergenic	LRPPRC(dist=51585),PPM1B(dist=121213)	M33997	C100001269	411.8	\Other chronic ischemic heart disease, unspecified\	campesterol	Lipid	Sterol	0.31	0.12	2.8e-08	0.022	G	A	0.0247609	0.404013	0.0296727	0	0.0247609	8
7	44580876	rs41279633:44580876:G:T	UTR5	NPC1L1	M33997	C100001269	411.8	\Other chronic ischemic heart disease, unspecified\	campesterol	Lipid	Sterol	0.23	0.15	6.9e-10	0.025	T	G	0.0988403	0.00716558	0.0367573	0	0.0988403	8
9	136149830	rs532436:136149830:G:A	intronic	ABO	M33997	C100001269	411.8	\Other chronic ischemic heart disease, unspecified\	campesterol	Lipid	Sterol	0.21	-0.17	4.6e-11	0.026	A	G	0.0670697	0.0490755	0.0340798	1	-0.0670697	8
2	41355596	rs71441133:41355596:G:A	intergenic	SLC8A1(dist=616021),LINC01913(dist=749099)	M33997	C100001269	411.4	Coronary atherosclerosis	campesterol	Lipid	Sterol	0.041	0.31	5.1e-09	0.052	A	G	0.0268561	0.504306	0.0402224	0	0.0268561	8
2	42977503	rs6544593:42977503:A:G	intronic	MTA3	M33997	C100001269	411.4	Coronary atherosclerosis	campesterol	Lipid	Sterol	0.43	-0.13	6.3e-10	0.021	G	A	-0.0134511	0.482254	0.019142	0	-0.0134511	8
2	44015391	rs11695053:44015391:A:C	intronic	DYNC2LI1	M33997	C100001269	411.4	Coronary atherosclerosis	campesterol	Lipid	Sterol	0.17	0.19	2.8e-12	0.028	C	A	0.00482832	0.846006	0.0248356	0	0.00482832	8
2	44073881	rs6544713:44073881:T:C	intronic	ABCG8	M33997	C100001269	411.4	Coronary atherosclerosis	campesterol	Lipid	Sterol	0.2	-0.33	2.7e-37	0.026	T	C	0.0665927	0.000368018	0.0186943	1	-0.0665927	8
2	44078853	rs56132765:44078853:G:A	exonic	ABCG8	M33997	C100001269	411.4	Coronary atherosclerosis	campesterol	Lipid	Sterol	0.088	-0.44	4.2e-34	0.036	A	G	-0.0953673	0.0105333	0.0372847	0	-0.0953673	8
2	44274729	rs11680869:44274729:A:G	intergenic	LRPPRC(dist=51585),PPM1B(dist=121213)	M33997	C100001269	411.4	Coronary atherosclerosis	campesterol	Lipid	Sterol	0.31	0.12	2.8e-08	0.022	G	A	0.0174174	0.368232	0.0193574	0	0.0174174	8
7	44580876	rs41279633:44580876:G:T	UTR5	NPC1L1	M33997	C100001269	411.4	Coronary atherosclerosis	campesterol	Lipid	Sterol	0.23	0.15	6.9e-10	0.025	T	G	0.0815984	0.000722917	0.0241373	0	0.0815984	8
9	136149830	rs532436:136149830:G:A	intronic	ABO	M33997	C100001269	411.4	Coronary atherosclerosis	campesterol	Lipid	Sterol	0.21	-0.17	4.6e-11	0.026	A	G	0.0397879	0.0750345	0.0223473	1	-0.0397879	8
2	41355596	rs71441133:41355596:G:A	intergenic	SLC8A1(dist=616021),LINC01913(dist=749099)	M33997	C100001269	272	Disorders of lipoid metabolism	campesterol	Lipid	Sterol	0.041	0.31	5.1e-09	0.052	A	G	0.0667236	0.0427028	0.0329229	0	0.0667236	8
2	42977503	rs6544593:42977503:A:G	intronic	MTA3	M33997	C100001269	272	Disorders of lipoid metabolism	campesterol	Lipid	Sterol	0.43	-0.13	6.3e-10	0.021	G	A	-0.0137623	0.380081	0.0156787	0	-0.0137623	8
2	44015391	rs11695053:44015391:A:C	intronic	DYNC2LI1	M33997	C100001269	272	Disorders of lipoid metabolism	campesterol	Lipid	Sterol	0.17	0.19	2.8e-12	0.028	C	A	0.032167	0.115182	0.020421	0	0.032167	8
2	44073881	rs6544713:44073881:T:C	intronic	ABCG8	M33997	C100001269	272	Disorders of lipoid metabolism	campesterol	Lipid	Sterol	0.2	-0.33	2.7e-37	0.026	T	C	0.0463682	0.00261018	0.0154021	1	-0.0463682	8
2	44078853	rs56132765:44078853:G:A	exonic	ABCG8	M33997	C100001269	272	Disorders of lipoid metabolism	campesterol	Lipid	Sterol	0.088	-0.44	4.2e-34	0.036	A	G	-0.108007	0.000395441	0.0304838	0	-0.108007	8
2	44274729	rs11680869:44274729:A:G	intergenic	LRPPRC(dist=51585),PPM1B(dist=121213)	M33997	C100001269	272	Disorders of lipoid metabolism	campesterol	Lipid	Sterol	0.31	0.12	2.8e-08	0.022	G	A	0.0179971	0.257132	0.0158845	0	0.0179971	8
7	44580876	rs41279633:44580876:G:T	UTR5	NPC1L1	M33997	C100001269	272	Disorders of lipoid metabolism	campesterol	Lipid	Sterol	0.23	0.15	6.9e-10	0.025	T	G	0.0475227	0.0176215	0.0200235	0	0.0475227	8
9	136149830	rs532436:136149830:G:A	intronic	ABO	M33997	C100001269	272	Disorders of lipoid metabolism	campesterol	Lipid	Sterol	0.21	-0.17	4.6e-11	0.026	A	G	0.0534934	0.00370143	0.0184313	1	-0.0534934	8
2	41355596	rs71441133:41355596:G:A	intergenic	SLC8A1(dist=616021),LINC01913(dist=749099)	M33997	C100001269	272.11	Hypercholesterolemia	campesterol	Lipid	Sterol	0.041	0.31	5.1e-09	0.052	A	G	0.1028	0.0241002	0.0455752	0	0.1028	8
2	42977503	rs6544593:42977503:A:G	intronic	MTA3	M33997	C100001269	272.11	Hypercholesterolemia	campesterol	Lipid	Sterol	0.43	-0.13	6.3e-10	0.021	G	A	-0.0237744	0.278176	0.0219238	0	-0.0237744	8
2	44015391	rs11695053:44015391:A:C	intronic	DYNC2LI1	M33997	C100001269	272.11	Hypercholesterolemia	campesterol	Lipid	Sterol	0.17	0.19	2.8e-12	0.028	C	A	0.0534175	0.0593939	0.0283358	0	0.0534175	8
2	44073881	rs6544713:44073881:T:C	intronic	ABCG8	M33997	C100001269	272.11	Hypercholesterolemia	campesterol	Lipid	Sterol	0.2	-0.33	2.7e-37	0.026	T	C	0.032893	0.126412	0.0215208	1	-0.032893	8
2	44078853	rs56132765:44078853:G:A	exonic	ABCG8	M33997	C100001269	272.11	Hypercholesterolemia	campesterol	Lipid	Sterol	0.088	-0.44	4.2e-34	0.036	A	G	-0.111935	0.00926189	0.0430149	0	-0.111935	8
2	44274729	rs11680869:44274729:A:G	intergenic	LRPPRC(dist=51585),PPM1B(dist=121213)	M33997	C100001269	272.11	Hypercholesterolemia	campesterol	Lipid	Sterol	0.31	0.12	2.8e-08	0.022	G	A	0.00660812	0.766037	0.0222199	0	0.00660812	8
7	44580876	rs41279633:44580876:G:T	UTR5	NPC1L1	M33997	C100001269	272.11	Hypercholesterolemia	campesterol	Lipid	Sterol	0.23	0.15	6.9e-10	0.025	T	G	0.0855812	0.00198804	0.0276781	0	0.0855812	8
9	136149830	rs532436:136149830:G:A	intronic	ABO	M33997	C100001269	272.11	Hypercholesterolemia	campesterol	Lipid	Sterol	0.21	-0.17	4.6e-11	0.026	A	G	0.0733713	0.0041356	0.0255853	1	-0.0733713	8
2	41355596	rs71441133:41355596:G:A	intergenic	SLC8A1(dist=616021),LINC01913(dist=749099)	M33997	C100001269	272.1	Hyperlipidemia	campesterol	Lipid	Sterol	0.041	0.31	5.1e-09	0.052	A	G	0.0612926	0.0581262	0.0323481	0	0.0612926	8
2	42977503	rs6544593:42977503:A:G	intronic	MTA3	M33997	C100001269	272.1	Hyperlipidemia	campesterol	Lipid	Sterol	0.43	-0.13	6.3e-10	0.021	G	A	-0.0117649	0.444096	0.015373	0	-0.0117649	8
2	44015391	rs11695053:44015391:A:C	intronic	DYNC2LI1	M33997	C100001269	272.1	Hyperlipidemia	campesterol	Lipid	Sterol	0.17	0.19	2.8e-12	0.028	C	A	0.0370067	0.0644761	0.0200135	0	0.0370067	8
2	44073881	rs6544713:44073881:T:C	intronic	ABCG8	M33997	C100001269	272.1	Hyperlipidemia	campesterol	Lipid	Sterol	0.2	-0.33	2.7e-37	0.026	T	C	0.0425038	0.0049161	0.0151125	1	-0.0425038	8
2	44078853	rs56132765:44078853:G:A	exonic	ABCG8	M33997	C100001269	272.1	Hyperlipidemia	campesterol	Lipid	Sterol	0.088	-0.44	4.2e-34	0.036	A	G	-0.10309	0.000557963	0.0298702	0	-0.10309	8
2	44274729	rs11680869:44274729:A:G	intergenic	LRPPRC(dist=51585),PPM1B(dist=121213)	M33997	C100001269	272.1	Hyperlipidemia	campesterol	Lipid	Sterol	0.31	0.12	2.8e-08	0.022	G	A	0.0183211	0.239807	0.0155867	0	0.0183211	8
7	44580876	rs41279633:44580876:G:T	UTR5	NPC1L1	M33997	C100001269	272.1	Hyperlipidemia	campesterol	Lipid	Sterol	0.23	0.15	6.9e-10	0.025	T	G	0.0536261	0.00623809	0.0196063	0	0.0536261	8
9	136149830	rs532436:136149830:G:A	intronic	ABO	M33997	C100001269	272.1	Hyperlipidemia	campesterol	Lipid	Sterol	0.21	-0.17	4.6e-11	0.026	A	G	0.0614431	0.000666943	0.0180579	1	-0.0614431	8
2	41355596	rs71441133:41355596:G:A	intergenic	SLC8A1(dist=616021),LINC01913(dist=749099)	M33997	C100001269	272.13	Mixed hyperlipidemia	campesterol	Lipid	Sterol	0.041	0.31	5.1e-09	0.052	A	G	0.0503033	0.211533	0.0402645	0	0.0503033	8
2	42977503	rs6544593:42977503:A:G	intronic	MTA3	M33997	C100001269	272.13	Mixed hyperlipidemia	campesterol	Lipid	Sterol	0.43	-0.13	6.3e-10	0.021	G	A	-0.00967566	0.611564	0.0190528	0	-0.00967566	8
2	44015391	rs11695053:44015391:A:C	intronic	DYNC2LI1	M33997	C100001269	272.13	Mixed hyperlipidemia	campesterol	Lipid	Sterol	0.17	0.19	2.8e-12	0.028	C	A	0.038634	0.11992	0.024842	0	0.038634	8
2	44073881	rs6544713:44073881:T:C	intronic	ABCG8	M33997	C100001269	272.13	Mixed hyperlipidemia	campesterol	Lipid	Sterol	0.2	-0.33	2.7e-37	0.026	T	C	0.0510258	0.00649197	0.0187482	1	-0.0510258	8
2	44078853	rs56132765:44078853:G:A	exonic	ABCG8	M33997	C100001269	272.13	Mixed hyperlipidemia	campesterol	Lipid	Sterol	0.088	-0.44	4.2e-34	0.036	A	G	-0.0944217	0.0111705	0.0372134	0	-0.0944217	8
2	44274729	rs11680869:44274729:A:G	intergenic	LRPPRC(dist=51585),PPM1B(dist=121213)	M33997	C100001269	272.13	Mixed hyperlipidemia	campesterol	Lipid	Sterol	0.31	0.12	2.8e-08	0.022	G	A	0.0184684	0.340727	0.0193835	0	0.0184684	8
7	44580876	rs41279633:44580876:G:T	UTR5	NPC1L1	M33997	C100001269	272.13	Mixed hyperlipidemia	campesterol	Lipid	Sterol	0.23	0.15	6.9e-10	0.025	T	G	0.0690782	0.00439853	0.0242544	0	0.0690782	8
9	136149830	rs532436:136149830:G:A	intronic	ABO	M33997	C100001269	272.13	Mixed hyperlipidemia	campesterol	Lipid	Sterol	0.21	-0.17	4.6e-11	0.026	A	G	0.0324866	0.147696	0.0224371	1	-0.0324866	8
2	41355596	rs71441133:41355596:G:A	intergenic	SLC8A1(dist=616021),LINC01913(dist=749099)	M33997	C100001269	411.2	Myocardial infarction	campesterol	Lipid	Sterol	0.041	0.31	5.1e-09	0.052	A	G	-0.0243798	0.67311	0.0577888	0	-0.0243798	8
2	42977503	rs6544593:42977503:A:G	intronic	MTA3	M33997	C100001269	411.2	Myocardial infarction	campesterol	Lipid	Sterol	0.43	-0.13	6.3e-10	0.021	G	A	-0.0179237	0.505549	0.0269207	0	-0.0179237	8
2	44015391	rs11695053:44015391:A:C	intronic	DYNC2LI1	M33997	C100001269	411.2	Myocardial infarction	campesterol	Lipid	Sterol	0.17	0.19	2.8e-12	0.028	C	A	0.0611892	0.0753975	0.0344124	0	0.0611892	8
2	44073881	rs6544713:44073881:T:C	intronic	ABCG8	M33997	C100001269	411.2	Myocardial infarction	campesterol	Lipid	Sterol	0.2	-0.33	2.7e-37	0.026	T	C	0.0792178	0.00256566	0.0262706	1	-0.0792178	8
2	44078853	rs56132765:44078853:G:A	exonic	ABCG8	M33997	C100001269	411.2	Myocardial infarction	campesterol	Lipid	Sterol	0.088	-0.44	4.2e-34	0.036	A	G	-0.10592	0.0464991	0.0532036	0	-0.10592	8
2	44274729	rs11680869:44274729:A:G	intergenic	LRPPRC(dist=51585),PPM1B(dist=121213)	M33997	C100001269	411.2	Myocardial infarction	campesterol	Lipid	Sterol	0.31	0.12	2.8e-08	0.022	G	A	0.0139522	0.607567	0.0271623	0	0.0139522	8
7	44580876	rs41279633:44580876:G:T	UTR5	NPC1L1	M33997	C100001269	411.2	Myocardial infarction	campesterol	Lipid	Sterol	0.23	0.15	6.9e-10	0.025	T	G	0.0822986	0.0150395	0.0338481	0	0.0822986	8
9	136149830	rs532436:136149830:G:A	intronic	ABO	M33997	C100001269	411.2	Myocardial infarction	campesterol	Lipid	Sterol	0.21	-0.17	4.6e-11	0.026	A	G	0.0486187	0.120281	0.0312926	1	-0.0486187	8
15	58678512	rs10468017:58678512:C:T	intergenic	AQP9(dist=200402),LIPC(dist=45663)	M00063	C266	272	Disorders of lipoid metabolism	cholesterol	Lipid	Sterol	0.33	0.12	7.3e-11	0.019	T	C	-0.011939	0.453957	0.0159437	0	-0.011939	2
19	11188153	rs55791371:11188153:A:C	intergenic	SMARCA4(dist=15195),LDLR(dist=11885)	M00063	C266	272	Disorders of lipoid metabolism	cholesterol	Lipid	Sterol	0.12	-0.2	1.4e-12	0.028	C	A	-0.174647	1.14e-14	0.0226152	0	-0.174647	2
15	58678512	rs10468017:58678512:C:T	intergenic	AQP9(dist=200402),LIPC(dist=45663)	M00063	C266	457.2	Encounter for long-term (current) use of antiplatelets/antithrombotics	cholesterol	Lipid	Sterol	0.33	0.12	7.3e-11	0.019	T	C	0.205656	0.00179994	0.0658865	0	0.205656	2
19	11188153	rs55791371:11188153:A:C	intergenic	SMARCA4(dist=15195),LDLR(dist=11885)	M00063	C266	457.2	Encounter for long-term (current) use of antiplatelets/antithrombotics	cholesterol	Lipid	Sterol	0.12	-0.2	1.4e-12	0.028	C	A	-0.236886	0.022859	0.10409	0	-0.236886	2
15	58678512	rs10468017:58678512:C:T	intergenic	AQP9(dist=200402),LIPC(dist=45663)	M00063	C266	272.11	Hypercholesterolemia	cholesterol	Lipid	Sterol	0.33	0.12	7.3e-11	0.019	T	C	-0.0262865	0.239921	0.022368	0	-0.0262865	2
19	11188153	rs55791371:11188153:A:C	intergenic	SMARCA4(dist=15195),LDLR(dist=11885)	M00063	C266	272.11	Hypercholesterolemia	cholesterol	Lipid	Sterol	0.12	-0.2	1.4e-12	0.028	C	A	-0.220583	9.52e-12	0.0323738	0	-0.220583	2
15	58678512	rs10468017:58678512:C:T	intergenic	AQP9(dist=200402),LIPC(dist=45663)	M00063	C266	272.1	Hyperlipidemia	cholesterol	Lipid	Sterol	0.33	0.12	7.3e-11	0.019	T	C	-0.0108618	0.487528	0.0156447	0	-0.0108618	2
19	11188153	rs55791371:11188153:A:C	intergenic	SMARCA4(dist=15195),LDLR(dist=11885)	M00063	C266	272.1	Hyperlipidemia	cholesterol	Lipid	Sterol	0.12	-0.2	1.4e-12	0.028	C	A	-0.18077	3.96e-16	0.0222084	0	-0.18077	2
15	58678512	rs10468017:58678512:C:T	intergenic	AQP9(dist=200402),LIPC(dist=45663)	M00063	C266	272.13	Mixed hyperlipidemia	cholesterol	Lipid	Sterol	0.33	0.12	7.3e-11	0.019	T	C	-0.015595	0.422192	0.0194297	0	-0.015595	2
19	11188153	rs55791371:11188153:A:C	intergenic	SMARCA4(dist=15195),LDLR(dist=11885)	M00063	C266	272.13	Mixed hyperlipidemia	cholesterol	Lipid	Sterol	0.12	-0.2	1.4e-12	0.028	C	A	-0.173717	3.75e-10	0.0277328	0	-0.173717	2
15	58678512	rs10468017:58678512:C:T	intergenic	AQP9(dist=200402),LIPC(dist=45663)	M00063	C266	395.2	Nonrheumatic aortic valve disorders	cholesterol	Lipid	Sterol	0.33	0.12	7.3e-11	0.019	T	C	0.0790237	0.013247	0.0319011	0	0.0790237	2
19	11188153	rs55791371:11188153:A:C	intergenic	SMARCA4(dist=15195),LDLR(dist=11885)	M00063	C266	395.2	Nonrheumatic aortic valve disorders	cholesterol	Lipid	Sterol	0.12	-0.2	1.4e-12	0.028	C	A	-0.135829	0.00369834	0.0467923	0	-0.135829	2
2	211549856	rs55932961:211549856:G:A	intergenic	CPS1(dist=6024),ERBB4(dist=690586)	M38637	C100002253	415.2	Chronic pulmonary heart disease	cinnamoylglycine	Xenobiotics	Food Component/Plant	0.31	0.12	1.1e-08	0.021	A	G	0.149712	0.000155397	0.0395832	0	0.149712	1
11	61573684	rs174551:61573684:T:C	intronic	FADS1	M32504	C100001181	555	Inflammatory bowel disease and other gastroenteritis and colitis	docosapentaenoate (n3 DPA	22:5n3)	Lipid	Polyunsaturated Fatty Acid (n3 and n6)	0.42	-0.17	8.2e-21	0.019	C	T	0.137786	0.000118672	0.0357987	0	0.137786
11	61573684	rs174551:61573684:T:C	intronic	FADS1	M32504	C100001181	555.1	Regional enteritis	docosapentaenoate (n3 DPA	22:5n3)	Lipid	Polyunsaturated Fatty Acid (n3 and n6)	0.42	-0.17	8.2e-21	0.019	C	T	0.159403	3.21e-05	0.0383397	0	0.159403
11	61573684	rs174551:61573684:T:C	intronic	FADS1	M18467	C2050	555	Inflammatory bowel disease and other gastroenteritis and colitis	eicosapentaenoate (EPA	20:5n3)	Lipid	Polyunsaturated Fatty Acid (n3 and n6)	0.42	-0.27	3.9e-48	0.018	C	T	0.137786	0.000118672	0.0357987	0	0.137786
11	61647288	rs7942717:61647288:G:A	intronic	FADS3	M18467	C2050	555	Inflammatory bowel disease and other gastroenteritis and colitis	eicosapentaenoate (EPA	20:5n3)	Lipid	Polyunsaturated Fatty Acid (n3 and n6)	0.13	0.17	7.5e-11	0.027	G	A	0.0207727	0.733307	0.0609611	1	-0.0207727
11	61573684	rs174551:61573684:T:C	intronic	FADS1	M18467	C2050	555.1	Regional enteritis	eicosapentaenoate (EPA	20:5n3)	Lipid	Polyunsaturated Fatty Acid (n3 and n6)	0.42	-0.27	3.9e-48	0.018	C	T	0.159403	3.21e-05	0.0383397	0	0.159403
11	61647288	rs7942717:61647288:G:A	intronic	FADS3	M18467	C2050	555.1	Regional enteritis	eicosapentaenoate (EPA	20:5n3)	Lipid	Polyunsaturated Fatty Acid (n3 and n6)	0.13	0.17	7.5e-11	0.027	G	A	0.00736283	0.910932	0.0658558	1	-0.00736283
10	101429593	rs11190234:101429593:G:A	intronic	ENTPD7	M32599	C100001989	306	Other mental disorder	glycocholenate sulfate*	Lipid	Secondary Bile Acid Metabolism	0.37	0.12	1.2e-09	0.019	A	G	-0.0145889	0.462862	0.0198718	0	-0.0145889	32
10	101592320	rs4148397:101592320:A:G	intronic	ABCC2	M32599	C100001989	306	Other mental disorder	glycocholenate sulfate*	Lipid	Secondary Bile Acid Metabolism	0.38	0.17	8.7e-19	0.019	A	G	0.0280625	0.124979	0.0182889	1	-0.0280625	32
10	101683518	rs374217424:101683518:TCTC:T	intronic	DNMBP	M32599	C100001989	306	Other mental disorder	glycocholenate sulfate*	Lipid	Secondary Bile Acid Metabolism	0.063	-0.21	1.4e-08	0.037	T	TCTC	0.0641666	0.044005	0.0318618	0	0.0641666	32
10	103399950	rs75671305:103399950:C:T	intronic	FBXW4	M32599	C100001989	306	Other mental disorder	glycocholenate sulfate*	Lipid	Secondary Bile Acid Metabolism	0.038	0.35	4.6e-13	0.048	T	C	0.0145437	0.717732	0.0402217	0	0.0145437	32
10	104410599	rs34269636:104410599:T:C	intronic	TRIM8	M32599	C100001989	306	Other mental disorder	glycocholenate sulfate*	Lipid	Secondary Bile Acid Metabolism	0.32	0.13	5.9e-10	0.02	C	T	-0.050318	0.0134536	0.0203589	0	-0.050318	32
11	110229530	rs10891091:110229530:C:T	ncRNA_intronic	LOC105369486	M32599	C100001989	306	Other mental disorder	glycocholenate sulfate*	Lipid	Secondary Bile Acid Metabolism	0.08	-0.26	1.3e-14	0.033	T	C	0.0601351	0.0714058	0.0333561	0	0.0601351	32
11	110247797	rs1573558:110247797:C:T	ncRNA_intronic	LOC105369486	M32599	C100001989	306	Other mental disorder	glycocholenate sulfate*	Lipid	Secondary Bile Acid Metabolism	0.34	0.24	3.1e-35	0.019	T	C	-0.0372513	0.0547764	0.0193949	0	-0.0372513	32
11	110345609	rs10789774:110345609:T:C	intergenic	FDX1(dist=10001),ARHGAP20(dist=102150)	M32599	C100001989	306	Other mental disorder	glycocholenate sulfate*	Lipid	Secondary Bile Acid Metabolism	0.055	-0.26	7.6e-11	0.04	C	T	0.0613867	0.0760352	0.0346009	0	0.0613867	32
11	110431728	rs17393434:110431728:T:C	intergenic	FDX1(dist=96120),ARHGAP20(dist=16031)	M32599	C100001989	306	Other mental disorder	glycocholenate sulfate*	Lipid	Secondary Bile Acid Metabolism	0.23	0.18	5.2e-16	0.022	C	T	-0.0307572	0.240754	0.0262189	0	-0.0307572	32
12	20577805	rs12811752:20577805:T:C	intronic	PDE3A	M32599	C100001989	306	Other mental disorder	glycocholenate sulfate*	Lipid	Secondary Bile Acid Metabolism	0.5	-0.13	5.8e-12	0.018	C	T	0.00281603	0.877665	0.0182728	0	0.00281603	32
12	20685982	rs12314434:20685982:A:G	intronic	PDE3A	M32599	C100001989	306	Other mental disorder	glycocholenate sulfate*	Lipid	Secondary Bile Acid Metabolism	0.18	0.2	2.5e-17	0.024	G	A	-0.00459253	0.871313	0.0283514	0	-0.00459253	32
12	20686126	rs11045294:20686126:A:T	intronic	PDE3A	M32599	C100001989	306	Other mental disorder	glycocholenate sulfate*	Lipid	Secondary Bile Acid Metabolism	0.23	-0.12	2.8e-08	0.021	T	A	-0.0065947	0.774859	0.0230556	0	-0.0065947	32
12	20775707	rs4340100:20775707:A:G	intronic	PDE3A	M32599	C100001989	306	Other mental disorder	glycocholenate sulfate*	Lipid	Secondary Bile Acid Metabolism	0.31	-0.15	1.6e-13	0.02	G	A	0.00108941	0.955036	0.0192854	0	0.00108941	32
12	20789066	rs7300068:20789066:G:A	intronic	PDE3A	M32599	C100001989	306	Other mental disorder	glycocholenate sulfate*	Lipid	Secondary Bile Acid Metabolism	0.2	0.14	4.1e-10	0.023	A	G	-0.0335423	0.200695	0.0262135	0	-0.0335423	32
12	20832856	rs371438027:20832856:T:C	intronic	PDE3A	M32599	C100001989	306	Other mental disorder	glycocholenate sulfate*	Lipid	Secondary Bile Acid Metabolism	0.079	-0.24	1.5e-12	0.033	C	T	-0.053347	0.133316	0.0355372	0	-0.053347	32
12	20893052	rs2037154:20893052:C:A	intronic	SLCO1C1	M32599	C100001989	306	Other mental disorder	glycocholenate sulfate*	Lipid	Secondary Bile Acid Metabolism	0.4	-0.29	9.7e-50	0.02	C	A	-0.0460387	0.0190339	0.0196336	1	0.0460387	32
12	21036782	rs5796887:21036782:CTGAT:C	intronic	SLCO1B3	M32599	C100001989	306	Other mental disorder	glycocholenate sulfate*	Lipid	Secondary Bile Acid Metabolism	0.26	-0.36	1.3e-56	0.022	CTGAT	C	-0.0454923	0.0772628	0.0257488	1	0.0454923	32
12	21142948	rs1910192:21142948:G:A	intergenic	SLCO1B3(dist=73105),SLCO1B7(dist=25682)	M32599	C100001989	306	Other mental disorder	glycocholenate sulfate*	Lipid	Secondary Bile Acid Metabolism	0.21	-0.13	1.2e-08	0.022	A	G	0.0352706	0.0740764	0.0197459	0	0.0352706	32
12	21309457	rs4149023:21309457:G:T	intronic	SLCO1B1	M32599	C100001989	306	Other mental disorder	glycocholenate sulfate*	Lipid	Secondary Bile Acid Metabolism	0.11	0.38	7.8e-37	0.03	T	G	-0.00774189	0.844396	0.0394425	0	-0.00774189	32
12	21317791	rs4149032:21317791:C:T	intronic	SLCO1B1	M32599	C100001989	306	Other mental disorder	glycocholenate sulfate*	Lipid	Secondary Bile Acid Metabolism	0.3	-0.38	1.4e-76	0.02	T	C	0.0136662	0.467722	0.0188166	0	0.0136662	32
12	21331549	rs4149056:21331549:T:C	exonic	SLCO1B1	M32599	C100001989	306	Other mental disorder	glycocholenate sulfate*	Lipid	Secondary Bile Acid Metabolism	0.22	0.66	1.4e-187	0.022	C	T	-0.0102645	0.678927	0.0247988	0	-0.0102645	32
12	21477837	rs7958005:21477837:G:T	intronic	SLCO1A2	M32599	C100001989	306	Other mental disorder	glycocholenate sulfate*	Lipid	Secondary Bile Acid Metabolism	0.096	0.3	6.2e-22	0.031	T	G	-0.013593	0.675585	0.0324807	0	-0.013593	32
12	21500395	rs11045988:21500395:C:T	intronic	SLCO1A2	M32599	C100001989	306	Other mental disorder	glycocholenate sulfate*	Lipid	Secondary Bile Acid Metabolism	0.21	0.19	1.3e-17	0.022	C	T	-0.00933342	0.656132	0.0209622	1	0.00933342	32
12	21554738	rs4762822:21554738:A:G	intergenic	SLCO1A2(dist=6367),PYROXD1(dist=35800)	M32599	C100001989	306	Other mental disorder	glycocholenate sulfate*	Lipid	Secondary Bile Acid Metabolism	0.38	0.12	3.6e-11	0.019	G	A	0.0118396	0.513411	0.0181143	0	0.0118396	32
12	21633036	rs2192170:21633036:C:T	intronic	RECQL	M32599	C100001989	306	Other mental disorder	glycocholenate sulfate*	Lipid	Secondary Bile Acid Metabolism	0.16	-0.22	2.3e-18	0.025	T	C	0.0223973	0.504278	0.0335349	0	0.0223973	32
12	21663065	rs12312710:21663065:G:A	intronic	GOLT1B	M32599	C100001989	306	Other mental disorder	glycocholenate sulfate*	Lipid	Secondary Bile Acid Metabolism	0.15	-0.21	1.7e-16	0.026	A	G	0.0176041	0.417398	0.0217034	0	0.0176041	32
12	21837299	rs2418004:21837299:G:A	intergenic	LDHB(dist=26510),KCNJ8(dist=80590)	M32599	C100001989	306	Other mental disorder	glycocholenate sulfate*	Lipid	Secondary Bile Acid Metabolism	0.055	0.27	5.9e-12	0.04	A	G	0.0506076	0.184684	0.0381493	0	0.0506076	32
12	21911047	rs188329253:21911047:T:G	intergenic	LDHB(dist=100258),KCNJ8(dist=6842)	M32599	C100001989	306	Other mental disorder	glycocholenate sulfate*	Lipid	Secondary Bile Acid Metabolism	0.089	0.21	3.8e-11	0.032	G	T	-0.0333386	0.35773	0.0362498	0	-0.0333386	32
12	21974228	rs16924332:21974228:T:C	intronic	ABCC9	M32599	C100001989	306	Other mental disorder	glycocholenate sulfate*	Lipid	Secondary Bile Acid Metabolism	0.36	0.14	5.7e-14	0.019	C	T	-0.0281464	0.136959	0.0189253	0	-0.0281464	32
12	22147897	rs10841919:22147897:T:A	intergenic	ABCC9(dist=58269),CMAS(dist=51211)	M32599	C100001989	306	Other mental disorder	glycocholenate sulfate*	Lipid	Secondary Bile Acid Metabolism	0.46	0.16	1.5e-17	0.018	A	T	-0.0330512	0.117455	0.0211115	0	-0.0330512	32
12	22401258	rs60325577:22401258:C:CT	NA	NA	M32599	C100001989	306	Other mental disorder	glycocholenate sulfate*	Lipid	Secondary Bile Acid Metabolism	0.21	-0.13	2.6e-09	0.022	CT	C	0.00941553	0.609799	0.018456	0	0.00941553	32
16	11637085	rs111573663:11637085:T:TTTTA	NA	NA	M32599	C100001989	306	Other mental disorder	glycocholenate sulfate*	Lipid	Secondary Bile Acid Metabolism	0.3	0.11	3.4e-08	0.02	TTTTA	T	-0.00733886	0.70791	0.0195883	0	-0.00733886	32
12	20586395	rs10841520:20586395:C:T	intronic	PDE3A	M52975	C100006642	573.5	Jaundice (not of newborn)	glycodeoxycholate 3-sulfate	Lipid	Secondary Bile Acid Metabolism	0.26	0.16	1e-13	0.022	T	C	0.120517	0.0941223	0.0719893	0	0.120517	14
12	20893052	rs2037154:20893052:C:A	intronic	SLCO1C1	M52975	C100006642	573.5	Jaundice (not of newborn)	glycodeoxycholate 3-sulfate	Lipid	Secondary Bile Acid Metabolism	0.4	-0.2	1.5e-22	0.02	C	A	0.0555009	0.382708	0.0635852	1	-0.0555009	14
12	20917133	rs139483317:20917133:G:A	intergenic	SLCO1C1(dist=10813),SLCO1B3(dist=46505)	M52975	C100006642	573.5	Jaundice (not of newborn)	glycodeoxycholate 3-sulfate	Lipid	Secondary Bile Acid Metabolism	0.091	-0.21	2.5e-09	0.034	A	G	-0.194126	0.0555699	0.101404	0	-0.194126	14
12	21001857	rs10770753:21001857:C:T	intronic	SLCO1B3	M52975	C100006642	573.5	Jaundice (not of newborn)	glycodeoxycholate 3-sulfate	Lipid	Secondary Bile Acid Metabolism	0.26	-0.25	3.1e-29	0.023	C	T	0.190372	0.0158759	0.0789349	1	-0.190372	14
12	21289196	rs200943514:21289196:T:C	intronic	SLCO1B1	M52975	C100006642	573.5	Jaundice (not of newborn)	glycodeoxycholate 3-sulfate	Lipid	Secondary Bile Acid Metabolism	0.11	0.23	2.4e-14	0.031	C	T	0.157183	0.195574	0.121444	0	0.157183	14
12	21321318	rs74532914:21321318:G:C	intronic	SLCO1B1	M52975	C100006642	573.5	Jaundice (not of newborn)	glycodeoxycholate 3-sulfate	Lipid	Secondary Bile Acid Metabolism	0.097	-0.43	2.2e-41	0.032	C	G	-0.275552	0.00145973	0.0865813	0	-0.275552	14
12	21331549	rs4149056:21331549:T:C	exonic	SLCO1B1	M52975	C100006642	573.5	Jaundice (not of newborn)	glycodeoxycholate 3-sulfate	Lipid	Secondary Bile Acid Metabolism	0.23	0.46	1.5e-85	0.023	C	T	0.134111	0.0854723	0.0779831	0	0.134111	14
12	21494924	rs10459076:21494924:A:C	intronic	SLCO1A2	M52975	C100006642	573.5	Jaundice (not of newborn)	glycodeoxycholate 3-sulfate	Lipid	Secondary Bile Acid Metabolism	0.11	0.26	1.5e-16	0.031	A	C	-0.128529	0.178319	0.0954928	1	0.128529	14
12	21497892	rs7301895:21497892:C:T	intronic	SLCO1A2	M52975	C100006642	573.5	Jaundice (not of newborn)	glycodeoxycholate 3-sulfate	Lipid	Secondary Bile Acid Metabolism	0.12	0.18	8.6e-10	0.029	T	C	0.0162768	0.876966	0.105109	0	0.0162768	14
12	21681322	rs71448606:21681322:C:T	intronic	SPX	M52975	C100006642	573.5	Jaundice (not of newborn)	glycodeoxycholate 3-sulfate	Lipid	Secondary Bile Acid Metabolism	0.18	0.16	1.9e-11	0.024	T	C	0.0460149	0.511033	0.0700141	0	0.0460149	14
12	21911047	rs188329253:21911047:T:G	intergenic	LDHB(dist=100258),KCNJ8(dist=6842)	M52975	C100006642	573.5	Jaundice (not of newborn)	glycodeoxycholate 3-sulfate	Lipid	Secondary Bile Acid Metabolism	0.09	0.21	1.7e-10	0.033	G	T	-0.0362139	0.760547	0.118826	0	-0.0362139	14
12	22147897	rs10841919:22147897:T:A	intergenic	ABCC9(dist=58269),CMAS(dist=51211)	M52975	C100006642	573.5	Jaundice (not of newborn)	glycodeoxycholate 3-sulfate	Lipid	Secondary Bile Acid Metabolism	0.46	0.14	1.6e-12	0.019	A	T	-0.0355339	0.604472	0.0686015	0	-0.0355339	14
12	22195202	rs10841927:22195202:C:G	intergenic	ABCC9(dist=105574),CMAS(dist=3906)	M52975	C100006642	573.5	Jaundice (not of newborn)	glycodeoxycholate 3-sulfate	Lipid	Secondary Bile Acid Metabolism	0.34	0.11	1.8e-08	0.02	G	C	-0.0196722	0.748504	0.0613576	0	-0.0196722	14
19	48392252	rs138320856:48392252:A:AT	NA	NA	M52975	C100006642	573.5	Jaundice (not of newborn)	glycodeoxycholate 3-sulfate	Lipid	Secondary Bile Acid Metabolism	0.17	-0.2	2.8e-15	0.026	AT	A	-0.00808762	0.921852	0.0824441	0	-0.00808762	14
1	47392764	rs11585983:47392764:T:C	intergenic	CYP4Z2P(dist=26617),CYP4A11(dist=2082)	M35678	C100001614	562.2	Diverticulitis	hexadecanedioate (C16-DC)	Lipid	Fatty Acid Dicarboxylate	0.26	0.13	6.5e-09	0.022	T	C	0.0153713	0.821415	0.0680947	1	-0.0153713	20
12	20577593	rs7304841:20577593:A:C	intronic	PDE3A	M35678	C100001614	562.2	Diverticulitis	hexadecanedioate (C16-DC)	Lipid	Fatty Acid Dicarboxylate	0.39	0.13	2.7e-12	0.019	C	A	-0.0377309	0.505094	0.0566104	0	-0.0377309	20
12	20685982	rs12314434:20685982:A:G	intronic	PDE3A	M35678	C100001614	562.2	Diverticulitis	hexadecanedioate (C16-DC)	Lipid	Fatty Acid Dicarboxylate	0.18	0.19	1.4e-15	0.024	G	A	0.0987678	0.240841	0.0842108	0	0.0987678	20
12	20789066	rs7300068:20789066:G:A	intronic	PDE3A	M35678	C100001614	562.2	Diverticulitis	hexadecanedioate (C16-DC)	Lipid	Fatty Acid Dicarboxylate	0.2	0.15	3.3e-10	0.023	A	G	0.00500744	0.950415	0.0805859	0	0.00500744	20
12	20834542	rs12809210:20834542:G:A	UTR3	PDE3A	M35678	C100001614	562.2	Diverticulitis	hexadecanedioate (C16-DC)	Lipid	Fatty Acid Dicarboxylate	0.047	-0.25	4e-09	0.043	A	G	-0.113825	0.378611	0.12928	0	-0.113825	20
12	20893052	rs2037154:20893052:C:A	intronic	SLCO1C1	M35678	C100001614	562.2	Diverticulitis	hexadecanedioate (C16-DC)	Lipid	Fatty Acid Dicarboxylate	0.4	-0.22	1.6e-27	0.02	C	A	0.0186647	0.754893	0.0597791	1	-0.0186647	20
12	21028839	rs4149130:21028839:C:A	intronic	SLCO1B3	M35678	C100001614	562.2	Diverticulitis	hexadecanedioate (C16-DC)	Lipid	Fatty Acid Dicarboxylate	0.26	-0.33	3.5e-49	0.022	C	A	0.0578915	0.453175	0.0771813	1	-0.0578915	20
12	21142948	rs1910192:21142948:G:A	intergenic	SLCO1B3(dist=73105),SLCO1B7(dist=25682)	M35678	C100001614	562.2	Diverticulitis	hexadecanedioate (C16-DC)	Lipid	Fatty Acid Dicarboxylate	0.21	-0.13	2.7e-09	0.023	A	G	0.0504745	0.404105	0.0605016	0	0.0504745	20
12	21309457	rs4149023:21309457:G:T	intronic	SLCO1B1	M35678	C100001614	562.2	Diverticulitis	hexadecanedioate (C16-DC)	Lipid	Fatty Acid Dicarboxylate	0.11	0.3	3.7e-24	0.03	T	G	0.096128	0.409235	0.116483	0	0.096128	20
12	21319526	rs2199766:21319526:G:A	intronic	SLCO1B1	M35678	C100001614	562.2	Diverticulitis	hexadecanedioate (C16-DC)	Lipid	Fatty Acid Dicarboxylate	0.3	-0.34	3.2e-62	0.02	A	G	-0.157986	0.00874102	0.0602533	0	-0.157986	20
12	21331549	rs4149056:21331549:T:C	exonic	SLCO1B1	M35678	C100001614	562.2	Diverticulitis	hexadecanedioate (C16-DC)	Lipid	Fatty Acid Dicarboxylate	0.22	0.57	5.6e-139	0.022	C	T	0.0717065	0.336315	0.0745843	0	0.0717065	20
12	21477837	rs7958005:21477837:G:T	intronic	SLCO1A2	M35678	C100001614	562.2	Diverticulitis	hexadecanedioate (C16-DC)	Lipid	Fatty Acid Dicarboxylate	0.096	0.29	1.7e-20	0.031	T	G	0.180687	0.0500013	0.0921902	0	0.180687	20
12	21500395	rs11045988:21500395:C:T	intronic	SLCO1A2	M35678	C100001614	562.2	Diverticulitis	hexadecanedioate (C16-DC)	Lipid	Fatty Acid Dicarboxylate	0.21	0.21	2.6e-20	0.023	C	T	-0.0709795	0.276668	0.0652488	1	0.0709795	20
12	21637225	rs10841833:21637225:G:T	intronic	RECQL	M35678	C100001614	562.2	Diverticulitis	hexadecanedioate (C16-DC)	Lipid	Fatty Acid Dicarboxylate	0.26	0.14	1.8e-11	0.021	T	G	0.104342	0.0898745	0.0615228	0	0.104342	20
12	21678106	rs11046104:21678106:G:A	intergenic	GOLT1B(dist=6769),SPX(dist=1085)	M35678	C100001614	562.2	Diverticulitis	hexadecanedioate (C16-DC)	Lipid	Fatty Acid Dicarboxylate	0.052	-0.3	1.2e-13	0.041	A	G	-0.134833	0.297582	0.129443	0	-0.134833	20
12	21759006	rs11046134:21759006:A:G	intergenic	GYS2(dist=1225),LDHB(dist=29270)	M35678	C100001614	562.2	Diverticulitis	hexadecanedioate (C16-DC)	Lipid	Fatty Acid Dicarboxylate	0.39	0.1	2.5e-08	0.019	G	A	0.0541567	0.374987	0.0610469	0	0.0541567	20
12	22147897	rs10841919:22147897:T:A	intergenic	ABCC9(dist=58269),CMAS(dist=51211)	M35678	C100001614	562.2	Diverticulitis	hexadecanedioate (C16-DC)	Lipid	Fatty Acid Dicarboxylate	0.46	0.16	5.3e-17	0.019	A	T	0.12471	0.0458194	0.0624454	0	0.12471	20
12	22401258	rs60325577:22401258:C:CT	NA	NA	M35678	C100001614	562.2	Diverticulitis	hexadecanedioate (C16-DC)	Lipid	Fatty Acid Dicarboxylate	0.21	-0.15	5e-12	0.022	CT	C	-0.0291086	0.609309	0.0569581	0	-0.0291086	20
19	15990431	rs2108622:15990431:C:T	exonic	CYP4F2	M35678	C100001614	562.2	Diverticulitis	hexadecanedioate (C16-DC)	Lipid	Fatty Acid Dicarboxylate	0.21	-0.13	1.7e-08	0.023	T	C	-0.082583	0.173855	0.0607261	0	-0.082583	20
19	16047829	rs12462333:16047829:G:A	intergenic	CYP4F11(dist=2153),OR10H4(dist=11989)	M35678	C100001614	562.2	Diverticulitis	hexadecanedioate (C16-DC)	Lipid	Fatty Acid Dicarboxylate	0.083	0.21	1.3e-10	0.033	A	G	0.0933264	0.420998	0.115983	0	0.0933264	20
12	118994130	rs11830316:118994130:G:A	intergenic	SUDS3(dist=138290),LINC02423(dist=202429)	M15745	C2051	290.11	Alzheimer's disease	methylsuccinate	Amino_Acid	Leucine Isoleucine and Valine Metabolism	0.16	0.14	1.2e-08	0.025	A	G	0.0297724	0.709618	0.0799523	0	0.0297724	20
12	119711646	rs7979848:119711646:A:G	intergenic	HSPB8(dist=79095),LINC00934(dist=9984)	M15745	C2051	290.11	Alzheimer's disease	methylsuccinate	Amino_Acid	Leucine Isoleucine and Valine Metabolism	0.21	0.15	2.6e-11	0.022	G	A	-0.0141395	0.860392	0.0803945	0	-0.0141395	20
12	119782846	rs61939533:119782846:G:A	intronic	CCDC60	M15745	C2051	290.11	Alzheimer's disease	methylsuccinate	Amino_Acid	Leucine Isoleucine and Valine Metabolism	0.11	-0.17	2.8e-08	0.03	A	G	-0.0696856	0.4861	0.100047	0	-0.0696856	20
12	119893650	rs73217294:119893650:G:A	intronic	CCDC60	M15745	C2051	290.11	Alzheimer's disease	methylsuccinate	Amino_Acid	Leucine Isoleucine and Valine Metabolism	0.18	-0.13	2.9e-08	0.024	A	G	0.0377388	0.725315	0.107403	0	0.0377388	20
12	119995773	rs708898:119995773:T:C	intergenic	CCDC60(dist=16921),TMEM233(dist=35491)	M15745	C2051	290.11	Alzheimer's disease	methylsuccinate	Amino_Acid	Leucine Isoleucine and Valine Metabolism	0.4	-0.14	1e-14	0.019	C	T	0.144836	0.0355582	0.068905	0	0.144836	20
12	120659997	rs10774543:120659997:C:T	intronic	PXN	M15745	C2051	290.11	Alzheimer's disease	methylsuccinate	Amino_Acid	Leucine Isoleucine and Valine Metabolism	0.4	-0.13	1.1e-12	0.019	C	T	0.0707194	0.310501	0.0697276	1	-0.0707194	20
12	120693288	rs1182859:120693288:A:G	intronic	PXN	M15745	C2051	290.11	Alzheimer's disease	methylsuccinate	Amino_Acid	Leucine Isoleucine and Valine Metabolism	0.18	-0.13	4.3e-08	0.024	G	A	-0.0111459	0.912126	0.100998	0	-0.0111459	20
12	120730236	rs7298516:120730236:G:T	intergenic	PXN(dist=26662),SIRT4(dist=9888)	M15745	C2051	290.11	Alzheimer's disease	methylsuccinate	Amino_Acid	Leucine Isoleucine and Valine Metabolism	0.19	-0.2	3.5e-18	0.023	G	T	-0.184321	0.024075	0.0817051	1	0.184321	20
12	120862474	rs7970933:120862474:G:A	intergenic	MSI1(dist=55491),COX6A1(dist=13419)	M15745	C2051	290.11	Alzheimer's disease	methylsuccinate	Amino_Acid	Leucine Isoleucine and Valine Metabolism	0.23	-0.17	2.5e-15	0.022	A	G	0.172229	0.0227419	0.0756122	0	0.172229	20
12	120945181	rs148250955:120945181:G:A	intronic	COQ5	M15745	C2051	290.11	Alzheimer's disease	methylsuccinate	Amino_Acid	Leucine Isoleucine and Valine Metabolism	0.1	0.36	8.9e-34	0.03	A	G	-0.287072	0.0722306	0.159692	0	-0.287072	20
12	121085949	rs4767925:121085949:A:G	intronic	CABP1	M15745	C2051	290.11	Alzheimer's disease	methylsuccinate	Amino_Acid	Leucine Isoleucine and Valine Metabolism	0.097	-0.22	1.8e-12	0.031	G	A	0.101048	0.310388	0.0996162	0	0.101048	20
12	121097622	rs529584:121097622:G:A	intronic	CABP1	M15745	C2051	290.11	Alzheimer's disease	methylsuccinate	Amino_Acid	Leucine Isoleucine and Valine Metabolism	0.15	0.23	3.2e-18	0.026	G	A	0.254441	0.00793148	0.0958363	1	-0.254441	20
12	121135508	rs10849778:121135508:G:A	UTR3	MLEC	M15745	C2051	290.11	Alzheimer's disease	methylsuccinate	Amino_Acid	Leucine Isoleucine and Valine Metabolism	0.16	-0.23	1.1e-20	0.025	A	G	0.102141	0.285253	0.0955862	0	0.102141	20
12	121176083	rs1799958:121176083:G:A	exonic	ACADS	M15745	C2051	290.11	Alzheimer's disease	methylsuccinate	Amino_Acid	Leucine Isoleucine and Valine Metabolism	0.28	0.54	1.7e-158	0.02	A	G	-0.192473	0.0160425	0.079932	0	-0.192473	20
12	121375558	rs10849820:121375558:A:T	intergenic	XLOC_009911(dist=29681),HNF1A-AS1(dist=32083)	M15745	C2051	290.11	Alzheimer's disease	methylsuccinate	Amino_Acid	Leucine Isoleucine and Valine Metabolism	0.081	-0.21	3.2e-10	0.034	T	A	0.0157749	0.894723	0.119214	0	0.0157749	20
12	121448395	rs2264779:121448395:C:T	intronic	C12orf43	M15745	C2051	290.11	Alzheimer's disease	methylsuccinate	Amino_Acid	Leucine Isoleucine and Valine Metabolism	0.42	-0.18	2.2e-21	0.019	C	T	-0.0963997	0.161778	0.0689001	1	0.0963997	20
12	121764164	rs938107:121764164:T:C	intronic	ANAPC5	M15745	C2051	290.11	Alzheimer's disease	methylsuccinate	Amino_Acid	Leucine Isoleucine and Valine Metabolism	0.39	-0.17	1.1e-19	0.019	T	C	0.0122842	0.858393	0.0688497	1	-0.0122842	20
12	121821916	rs792599:121821916:G:T	intergenic	ANAPC5(dist=29904),RNF34(dist=15970)	M15745	C2051	290.11	Alzheimer's disease	methylsuccinate	Amino_Acid	Leucine Isoleucine and Valine Metabolism	0.34	0.17	1.2e-18	0.019	G	T	0.0548669	0.46854	0.0756949	1	-0.0548669	20
12	121929055	rs61953500:121929055:G:A	intronic	KDM2B	M15745	C2051	290.11	Alzheimer's disease	methylsuccinate	Amino_Acid	Leucine Isoleucine and Valine Metabolism	0.13	-0.16	1.3e-08	0.028	A	G	0.0461008	0.724482	0.130787	0	0.0461008	20
12	122180206	rs201197641:122180206:GC:G	intronic	TMEM120B	M15745	C2051	290.11	Alzheimer's disease	methylsuccinate	Amino_Acid	Leucine Isoleucine and Valine Metabolism	0.088	-0.22	1.9e-11	0.032	G	GC	-0.0567206	0.674272	0.134956	0	-0.0567206	20
12	118994130	rs11830316:118994130:G:A	intergenic	SUDS3(dist=138290),LINC02423(dist=202429)	M15745	C2051	1001	Foreign body injury	methylsuccinate	Amino_Acid	Leucine Isoleucine and Valine Metabolism	0.16	0.14	1.2e-08	0.025	A	G	-0.118638	0.471594	0.1648	0	-0.118638	20
12	119711646	rs7979848:119711646:A:G	intergenic	HSPB8(dist=79095),LINC00934(dist=9984)	M15745	C2051	1001	Foreign body injury	methylsuccinate	Amino_Acid	Leucine Isoleucine and Valine Metabolism	0.21	0.15	2.6e-11	0.022	G	A	0.0308783	0.843424	0.156322	0	0.0308783	20
12	119782846	rs61939533:119782846:G:A	intronic	CCDC60	M15745	C2051	1001	Foreign body injury	methylsuccinate	Amino_Acid	Leucine Isoleucine and Valine Metabolism	0.11	-0.17	2.8e-08	0.03	A	G	0.0875621	0.639598	0.186998	0	0.0875621	20
12	119893650	rs73217294:119893650:G:A	intronic	CCDC60	M15745	C2051	1001	Foreign body injury	methylsuccinate	Amino_Acid	Leucine Isoleucine and Valine Metabolism	0.18	-0.13	2.9e-08	0.024	A	G	0.0152334	0.942795	0.212329	0	0.0152334	20
12	119995773	rs708898:119995773:T:C	intergenic	CCDC60(dist=16921),TMEM233(dist=35491)	M15745	C2051	1001	Foreign body injury	methylsuccinate	Amino_Acid	Leucine Isoleucine and Valine Metabolism	0.4	-0.14	1e-14	0.019	C	T	-0.0407647	0.768189	0.138305	0	-0.0407647	20
12	120659997	rs10774543:120659997:C:T	intronic	PXN	M15745	C2051	1001	Foreign body injury	methylsuccinate	Amino_Acid	Leucine Isoleucine and Valine Metabolism	0.4	-0.13	1.1e-12	0.019	C	T	-0.124098	0.381583	0.14183	1	0.124098	20
12	120693288	rs1182859:120693288:A:G	intronic	PXN	M15745	C2051	1001	Foreign body injury	methylsuccinate	Amino_Acid	Leucine Isoleucine and Valine Metabolism	0.18	-0.13	4.3e-08	0.024	G	A	-0.0851702	0.67961	0.206225	0	-0.0851702	20
12	120730236	rs7298516:120730236:G:T	intergenic	PXN(dist=26662),SIRT4(dist=9888)	M15745	C2051	1001	Foreign body injury	methylsuccinate	Amino_Acid	Leucine Isoleucine and Valine Metabolism	0.19	-0.2	3.5e-18	0.023	G	T	-0.317513	0.0596665	0.168599	1	0.317513	20
12	120862474	rs7970933:120862474:G:A	intergenic	MSI1(dist=55491),COX6A1(dist=13419)	M15745	C2051	1001	Foreign body injury	methylsuccinate	Amino_Acid	Leucine Isoleucine and Valine Metabolism	0.23	-0.17	2.5e-15	0.022	A	G	0.132606	0.376269	0.149872	0	0.132606	20
12	120945181	rs148250955:120945181:G:A	intronic	COQ5	M15745	C2051	1001	Foreign body injury	methylsuccinate	Amino_Acid	Leucine Isoleucine and Valine Metabolism	0.1	0.36	8.9e-34	0.03	A	G	-0.260577	0.40426	0.312428	0	-0.260577	20
12	121085949	rs4767925:121085949:A:G	intronic	CABP1	M15745	C2051	1001	Foreign body injury	methylsuccinate	Amino_Acid	Leucine Isoleucine and Valine Metabolism	0.097	-0.22	1.8e-12	0.031	G	A	0.537312	0.00155407	0.1698	0	0.537312	20
12	121097622	rs529584:121097622:G:A	intronic	CABP1	M15745	C2051	1001	Foreign body injury	methylsuccinate	Amino_Acid	Leucine Isoleucine and Valine Metabolism	0.15	0.23	3.2e-18	0.026	G	A	0.220484	0.238515	0.187055	1	-0.220484	20
12	121135508	rs10849778:121135508:G:A	UTR3	MLEC	M15745	C2051	1001	Foreign body injury	methylsuccinate	Amino_Acid	Leucine Isoleucine and Valine Metabolism	0.16	-0.23	1.1e-20	0.025	A	G	0.176555	0.331428	0.181782	0	0.176555	20
12	121176083	rs1799958:121176083:G:A	exonic	ACADS	M15745	C2051	1001	Foreign body injury	methylsuccinate	Amino_Acid	Leucine Isoleucine and Valine Metabolism	0.28	0.54	1.7e-158	0.02	A	G	-0.262035	0.104342	0.161336	0	-0.262035	20
12	121375558	rs10849820:121375558:A:T	intergenic	XLOC_009911(dist=29681),HNF1A-AS1(dist=32083)	M15745	C2051	1001	Foreign body injury	methylsuccinate	Amino_Acid	Leucine Isoleucine and Valine Metabolism	0.081	-0.21	3.2e-10	0.034	T	A	0.179167	0.417493	0.220981	0	0.179167	20
12	121448395	rs2264779:121448395:C:T	intronic	C12orf43	M15745	C2051	1001	Foreign body injury	methylsuccinate	Amino_Acid	Leucine Isoleucine and Valine Metabolism	0.42	-0.18	2.2e-21	0.019	C	T	0.0697313	0.604381	0.134594	1	-0.0697313	20
12	121764164	rs938107:121764164:T:C	intronic	ANAPC5	M15745	C2051	1001	Foreign body injury	methylsuccinate	Amino_Acid	Leucine Isoleucine and Valine Metabolism	0.39	-0.17	1.1e-19	0.019	T	C	-0.0688379	0.613043	0.136114	1	0.0688379	20
12	121821916	rs792599:121821916:G:T	intergenic	ANAPC5(dist=29904),RNF34(dist=15970)	M15745	C2051	1001	Foreign body injury	methylsuccinate	Amino_Acid	Leucine Isoleucine and Valine Metabolism	0.34	0.17	1.2e-18	0.019	G	T	0.207136	0.143538	0.141606	1	-0.207136	20
12	121929055	rs61953500:121929055:G:A	intronic	KDM2B	M15745	C2051	1001	Foreign body injury	methylsuccinate	Amino_Acid	Leucine Isoleucine and Valine Metabolism	0.13	-0.16	1.3e-08	0.028	A	G	0.388278	0.0850256	0.22545	0	0.388278	20
12	122180206	rs201197641:122180206:GC:G	intronic	TMEM120B	M15745	C2051	1001	Foreign body injury	methylsuccinate	Amino_Acid	Leucine Isoleucine and Valine Metabolism	0.088	-0.22	1.9e-11	0.032	G	GC	0.390284	0.0743781	0.218736	0	0.390284	20
2	211418278	rs5838211:211418278:AG:A	intronic	CPS1	M27710	C100001006	571.81	Portal hypertension	N-acetylglycine	Amino_Acid	Glycine Serine and Threonine Metabolism	0.44	-0.11	2.9e-08	0.019	A	AG	-0.0707347	0.144397	0.0484612	0	-0.0707347	3
2	211540507	rs1047891:211540507:C:A	exonic	CPS1	M27710	C100001006	571.81	Portal hypertension	N-acetylglycine	Amino_Acid	Glycine Serine and Threonine Metabolism	0.35	0.2	1.8e-25	0.019	A	C	0.153159	0.00140679	0.0479634	0	0.153159	3
9	5934989	rs13298772:5934989:T:C	intronic	KIAA2026	M27710	C100001006	571.81	Portal hypertension	N-acetylglycine	Amino_Acid	Glycine Serine and Threonine Metabolism	0.057	0.24	3.3e-09	0.04	C	T	0.149781	0.130593	0.0990744	0	0.149781	3
2	211418278	rs5838211:211418278:AG:A	intronic	CPS1	M27710	C100001006	579.2	Splenomegaly	N-acetylglycine	Amino_Acid	Glycine Serine and Threonine Metabolism	0.44	-0.11	2.9e-08	0.019	A	AG	-0.173487	0.00238595	0.0571161	0	-0.173487	3
2	211540507	rs1047891:211540507:C:A	exonic	CPS1	M27710	C100001006	579.2	Splenomegaly	N-acetylglycine	Amino_Acid	Glycine Serine and Threonine Metabolism	0.35	0.2	1.8e-25	0.019	A	C	0.218605	7.26e-05	0.0550994	0	0.218605	3
9	5934989	rs13298772:5934989:T:C	intronic	KIAA2026	M27710	C100001006	579.2	Splenomegaly	N-acetylglycine	Amino_Acid	Glycine Serine and Threonine Metabolism	0.057	0.24	3.3e-09	0.04	C	T	0.000429908	0.997212	0.122609	0	0.000429908	3
11	116623213	rs66505542:116623213:TA:T	intronic	BUD13	M46798	C100002989	272.12	Hyperglyceridemia	oleoyl-linoleoyl-glycerol (18:1/18:2) [1]	Lipid	Diacylglycerol	0.17	-0.28	3.4e-31	0.024	TA	T	0.610928	5.56e-15	0.0781875	1	-0.610928	7
11	61564299	rs4246215:61564299:G:T	UTR3	FEN1	M46798	C100002989	272.12	Hyperglyceridemia	oleoyl-linoleoyl-glycerol (18:1/18:2) [1]	Lipid	Diacylglycerol	0.45	0.14	8.2e-15	0.019	T	G	0.0853149	0.211354	0.0682625	0	0.0853149	7
19	19393714	rs8100204:19393714:G:A	intronic	SUGP1	M46798	C100002989	272.12	Hyperglyceridemia	oleoyl-linoleoyl-glycerol (18:1/18:2) [1]	Lipid	Diacylglycerol	0.16	-0.14	4.4e-08	0.026	A	G	-0.000436095	0.996334	0.0949607	0	-0.000436095	7
19	45390333	rs283815:45390333:A:G	intronic	NECTIN2	M46798	C100002989	272.12	Hyperglyceridemia	oleoyl-linoleoyl-glycerol (18:1/18:2) [1]	Lipid	Diacylglycerol	0.22	0.12	2.4e-08	0.022	G	A	0.215474	0.00505946	0.0768678	0	0.215474	7
2	27730940	rs1260326:27730940:T:C	exonic	GCKR	M46798	C100002989	272.12	Hyperglyceridemia	oleoyl-linoleoyl-glycerol (18:1/18:2) [1]	Lipid	Diacylglycerol	0.37	-0.11	7.8e-09	0.019	T	C	0.205615	0.00241996	0.06779	1	-0.205615	7
7	72939244	rs11983997:72939244:G:C	intergenic	BAZ1B(dist=2629),BCL7B(dist=11439)	M46798	C100002989	272.12	Hyperglyceridemia	oleoyl-linoleoyl-glycerol (18:1/18:2) [1]	Lipid	Diacylglycerol	0.15	-0.14	1.6e-08	0.026	C	G	-0.0327143	0.699285	0.0846907	0	-0.0327143	7
8	19863839	rs35878331:19863839:G:GA	NA	NA	M46798	C100002989	272.12	Hyperglyceridemia	oleoyl-linoleoyl-glycerol (18:1/18:2) [1]	Lipid	Diacylglycerol	0.26	-0.13	1.9e-09	0.021	GA	G	-0.285292	0.000462671	0.0814773	0	-0.285292	7
11	116623213	rs66505542:116623213:TA:T	intronic	BUD13	M46798	C100002989	272.13	Mixed hyperlipidemia	oleoyl-linoleoyl-glycerol (18:1/18:2) [1]	Lipid	Diacylglycerol	0.17	-0.28	3.4e-31	0.024	TA	T	0.124675	2.52e-07	0.024181	1	-0.124675	7
11	61564299	rs4246215:61564299:G:T	UTR3	FEN1	M46798	C100002989	272.13	Mixed hyperlipidemia	oleoyl-linoleoyl-glycerol (18:1/18:2) [1]	Lipid	Diacylglycerol	0.45	0.14	8.2e-15	0.019	T	G	5e-05	0.997937	0.0184377	0	5e-05	7
19	19393714	rs8100204:19393714:G:A	intronic	SUGP1	M46798	C100002989	272.13	Mixed hyperlipidemia	oleoyl-linoleoyl-glycerol (18:1/18:2) [1]	Lipid	Diacylglycerol	0.16	-0.14	4.4e-08	0.026	A	G	-0.0095858	0.706015	0.0254132	0	-0.0095858	7
19	45390333	rs283815:45390333:A:G	intronic	NECTIN2	M46798	C100002989	272.13	Mixed hyperlipidemia	oleoyl-linoleoyl-glycerol (18:1/18:2) [1]	Lipid	Diacylglycerol	0.22	0.12	2.4e-08	0.022	G	A	0.0688915	0.00126419	0.0213685	0	0.0688915	7
2	27730940	rs1260326:27730940:T:C	exonic	GCKR	M46798	C100002989	272.13	Mixed hyperlipidemia	oleoyl-linoleoyl-glycerol (18:1/18:2) [1]	Lipid	Diacylglycerol	0.37	-0.11	7.8e-09	0.019	T	C	0.0721532	7.22e-05	0.018178	1	-0.0721532	7
7	72939244	rs11983997:72939244:G:C	intergenic	BAZ1B(dist=2629),BCL7B(dist=11439)	M46798	C100002989	272.13	Mixed hyperlipidemia	oleoyl-linoleoyl-glycerol (18:1/18:2) [1]	Lipid	Diacylglycerol	0.15	-0.14	1.6e-08	0.026	C	G	-0.0232144	0.301932	0.0224879	0	-0.0232144	7
8	19863839	rs35878331:19863839:G:GA	NA	NA	M46798	C100002989	272.13	Mixed hyperlipidemia	oleoyl-linoleoyl-glycerol (18:1/18:2) [1]	Lipid	Diacylglycerol	0.26	-0.13	1.9e-09	0.021	GA	G	-0.0559959	0.00584489	0.0203151	0	-0.0559959	7
11	116648917	rs964184:116648917:G:C	UTR3	ZPR1	M46799	C100002990	272.12	Hyperglyceridemia	oleoyl-linoleoyl-glycerol (18:1/18:2) [2]	Lipid	Diacylglycerol	0.13	-0.3	1.9e-29	0.027	G	C	0.625767	4.48e-15	0.0798092	1	-0.625767	6
11	61564299	rs4246215:61564299:G:T	UTR3	FEN1	M46799	C100002990	272.12	Hyperglyceridemia	oleoyl-linoleoyl-glycerol (18:1/18:2) [2]	Lipid	Diacylglycerol	0.45	0.14	6.2e-14	0.018	T	G	0.0853149	0.211354	0.0682625	0	0.0853149	6
19	45394969	rs184017:45394969:T:G	intronic	TOMM40	M46799	C100002990	272.12	Hyperglyceridemia	oleoyl-linoleoyl-glycerol (18:1/18:2) [2]	Lipid	Diacylglycerol	0.22	0.12	2.5e-08	0.022	G	T	0.214143	0.00539016	0.0769552	0	0.214143	6
2	27730940	rs1260326:27730940:T:C	exonic	GCKR	M46799	C100002990	272.12	Hyperglyceridemia	oleoyl-linoleoyl-glycerol (18:1/18:2) [2]	Lipid	Diacylglycerol	0.37	-0.12	2.4e-09	0.019	T	C	0.205615	0.00241996	0.06779	1	-0.205615	6
7	73042085	rs62466318:73042085:C:T	intergenic	MLXIPL(dist=3215),VPS37D(dist=40089)	M46799	C100002990	272.12	Hyperglyceridemia	oleoyl-linoleoyl-glycerol (18:1/18:2) [2]	Lipid	Diacylglycerol	0.17	-0.14	9.6e-09	0.024	T	C	-0.117891	0.16823	0.0855579	0	-0.117891	6
8	19863839	rs35878331:19863839:G:GA	NA	NA	M46799	C100002990	272.12	Hyperglyceridemia	oleoyl-linoleoyl-glycerol (18:1/18:2) [2]	Lipid	Diacylglycerol	0.26	-0.12	1.5e-08	0.021	GA	G	-0.285292	0.000462671	0.0814773	0	-0.285292	6
11	116648917	rs964184:116648917:G:C	UTR3	ZPR1	M46799	C100002990	272.1	Hyperlipidemia	oleoyl-linoleoyl-glycerol (18:1/18:2) [2]	Lipid	Diacylglycerol	0.13	-0.3	1.9e-29	0.027	G	C	0.134758	2.52e-11	0.0201984	1	-0.134758	6
11	61564299	rs4246215:61564299:G:T	UTR3	FEN1	M46799	C100002990	272.1	Hyperlipidemia	oleoyl-linoleoyl-glycerol (18:1/18:2) [2]	Lipid	Diacylglycerol	0.45	0.14	6.2e-14	0.018	T	G	-0.00879759	0.554048	0.014868	0	-0.00879759	6
19	45394969	rs184017:45394969:T:G	intronic	TOMM40	M46799	C100002990	272.1	Hyperlipidemia	oleoyl-linoleoyl-glycerol (18:1/18:2) [2]	Lipid	Diacylglycerol	0.22	0.12	2.5e-08	0.022	G	T	0.0756268	1.15e-05	0.0172403	0	0.0756268	6
2	27730940	rs1260326:27730940:T:C	exonic	GCKR	M46799	C100002990	272.1	Hyperlipidemia	oleoyl-linoleoyl-glycerol (18:1/18:2) [2]	Lipid	Diacylglycerol	0.37	-0.12	2.4e-09	0.019	T	C	0.0657316	7.3e-06	0.0146559	1	-0.0657316	6
7	73042085	rs62466318:73042085:C:T	intergenic	MLXIPL(dist=3215),VPS37D(dist=40089)	M46799	C100002990	272.1	Hyperlipidemia	oleoyl-linoleoyl-glycerol (18:1/18:2) [2]	Lipid	Diacylglycerol	0.17	-0.14	9.6e-09	0.024	T	C	-0.0296915	0.0954277	0.0178067	0	-0.0296915	6
8	19863839	rs35878331:19863839:G:GA	NA	NA	M46799	C100002990	272.1	Hyperlipidemia	oleoyl-linoleoyl-glycerol (18:1/18:2) [2]	Lipid	Diacylglycerol	0.26	-0.12	1.5e-08	0.021	GA	G	-0.0567683	0.000514265	0.0163445	0	-0.0567683	6
11	116648917	rs964184:116648917:G:C	UTR3	ZPR1	M46799	C100002990	272.13	Mixed hyperlipidemia	oleoyl-linoleoyl-glycerol (18:1/18:2) [2]	Lipid	Diacylglycerol	0.13	-0.3	1.9e-29	0.027	G	C	0.145882	4.11e-09	0.0248108	1	-0.145882	6
11	61564299	rs4246215:61564299:G:T	UTR3	FEN1	M46799	C100002990	272.13	Mixed hyperlipidemia	oleoyl-linoleoyl-glycerol (18:1/18:2) [2]	Lipid	Diacylglycerol	0.45	0.14	6.2e-14	0.018	T	G	5e-05	0.997937	0.0184377	0	5e-05	6
19	45394969	rs184017:45394969:T:G	intronic	TOMM40	M46799	C100002990	272.13	Mixed hyperlipidemia	oleoyl-linoleoyl-glycerol (18:1/18:2) [2]	Lipid	Diacylglycerol	0.22	0.12	2.5e-08	0.022	G	T	0.0678082	0.00152199	0.0213877	0	0.0678082	6
2	27730940	rs1260326:27730940:T:C	exonic	GCKR	M46799	C100002990	272.13	Mixed hyperlipidemia	oleoyl-linoleoyl-glycerol (18:1/18:2) [2]	Lipid	Diacylglycerol	0.37	-0.12	2.4e-09	0.019	T	C	0.0721532	7.22e-05	0.018178	1	-0.0721532	6
7	73042085	rs62466318:73042085:C:T	intergenic	MLXIPL(dist=3215),VPS37D(dist=40089)	M46799	C100002990	272.13	Mixed hyperlipidemia	oleoyl-linoleoyl-glycerol (18:1/18:2) [2]	Lipid	Diacylglycerol	0.17	-0.14	9.6e-09	0.024	T	C	-0.0264887	0.232141	0.0221688	0	-0.0264887	6
8	19863839	rs35878331:19863839:G:GA	NA	NA	M46799	C100002990	272.13	Mixed hyperlipidemia	oleoyl-linoleoyl-glycerol (18:1/18:2) [2]	Lipid	Diacylglycerol	0.26	-0.12	1.5e-08	0.021	GA	G	-0.0559959	0.00584489	0.0203151	0	-0.0559959	6
10	102075479	rs603424:102075479:G:A	intronic	PKD2L1	M33447	C452	411.8	\Other chronic ischemic heart disease, unspecified\	palmitoleate (16:1n7)	Lipid	Long Chain Fatty Acid	0.11	-0.21	9.9e-14	0.029	A	G	0.146789	2.09e-05	0.0344961	0	0.146789	1
10	102075479	rs603424:102075479:G:A	intronic	PKD2L1	M33447	C452	411.4	Coronary atherosclerosis	palmitoleate (16:1n7)	Lipid	Long Chain Fatty Acid	0.11	-0.21	9.9e-14	0.029	A	G	0.113472	5.78e-07	0.0227012	0	0.113472	1
10	102075479	rs603424:102075479:G:A	intronic	PKD2L1	M33447	C452	401.22	Hypertensive chronic kidney disease	palmitoleate (16:1n7)	Lipid	Long Chain Fatty Acid	0.11	-0.21	9.9e-14	0.029	A	G	0.154085	2.16e-05	0.0362796	0	0.154085	1
10	102075479	rs603424:102075479:G:A	intronic	PKD2L1	M33447	C452	401.21	Hypertensive heart disease	palmitoleate (16:1n7)	Lipid	Long Chain Fatty Acid	0.11	-0.21	9.9e-14	0.029	A	G	0.156705	1.45e-05	0.0361371	0	0.156705	1
1	55662680	rs4926670:55662680:C:T	intronic	USP24	M37506	C100002107	411.4	Coronary atherosclerosis	palmitoyl sphingomyelin (d18:1/16:0)	Lipid	Sphingolipid Metabolism	0.24	-0.12	2.6e-08	0.022	T	C	-0.0802539	0.0169256	0.0336028	0	-0.0802539	2
19	11198187	rs17248720:11198187:C:T	intergenic	SMARCA4(dist=25229),LDLR(dist=1851)	M37506	C100002107	411.4	Coronary atherosclerosis	palmitoyl sphingomyelin (d18:1/16:0)	Lipid	Sphingolipid Metabolism	0.12	-0.19	4.1e-11	0.028	T	C	-0.101864	0.000288235	0.0280954	0	-0.101864	2
1	55662680	rs4926670:55662680:C:T	intronic	USP24	M37506	C100002107	272	Disorders of lipoid metabolism	palmitoyl sphingomyelin (d18:1/16:0)	Lipid	Sphingolipid Metabolism	0.24	-0.12	2.6e-08	0.022	T	C	-0.032266	0.237161	0.0272953	0	-0.032266	2
19	11198187	rs17248720:11198187:C:T	intergenic	SMARCA4(dist=25229),LDLR(dist=1851)	M37506	C100002107	272	Disorders of lipoid metabolism	palmitoyl sphingomyelin (d18:1/16:0)	Lipid	Sphingolipid Metabolism	0.12	-0.19	4.1e-11	0.028	T	C	-0.183983	2.12e-15	0.0231882	0	-0.183983	2
[truncated: 251 more rows]

## Sheet: ST6
Supplemental table 6: List of single nucleotide polymorphisms (SNP) driving each significant metabolite-phenotype association by mendelian randomization (IVWA) in African ancestry.
[truncated: 50 more rows]

[truncated: 2 more sheets: ST7, ST8]
